# Supplementary material for: Allosteric activation or inhibition of PI3Kγ mediated through conformational changes in the p110γ helical domain
Source: eLife journal article supplement (doi:10.7554/elife.88058), 2023-05-23
Supplement: figures [file elife-88058-figures-v1.pdf]

---

## Figures and figure supplements

Allosteric activation or inhibition of PI3K $\gamma$  mediated through conformational changes in the p110 $\gamma$  helical domain

**Noah J Harris and Meredith L Jenkins *et al.***

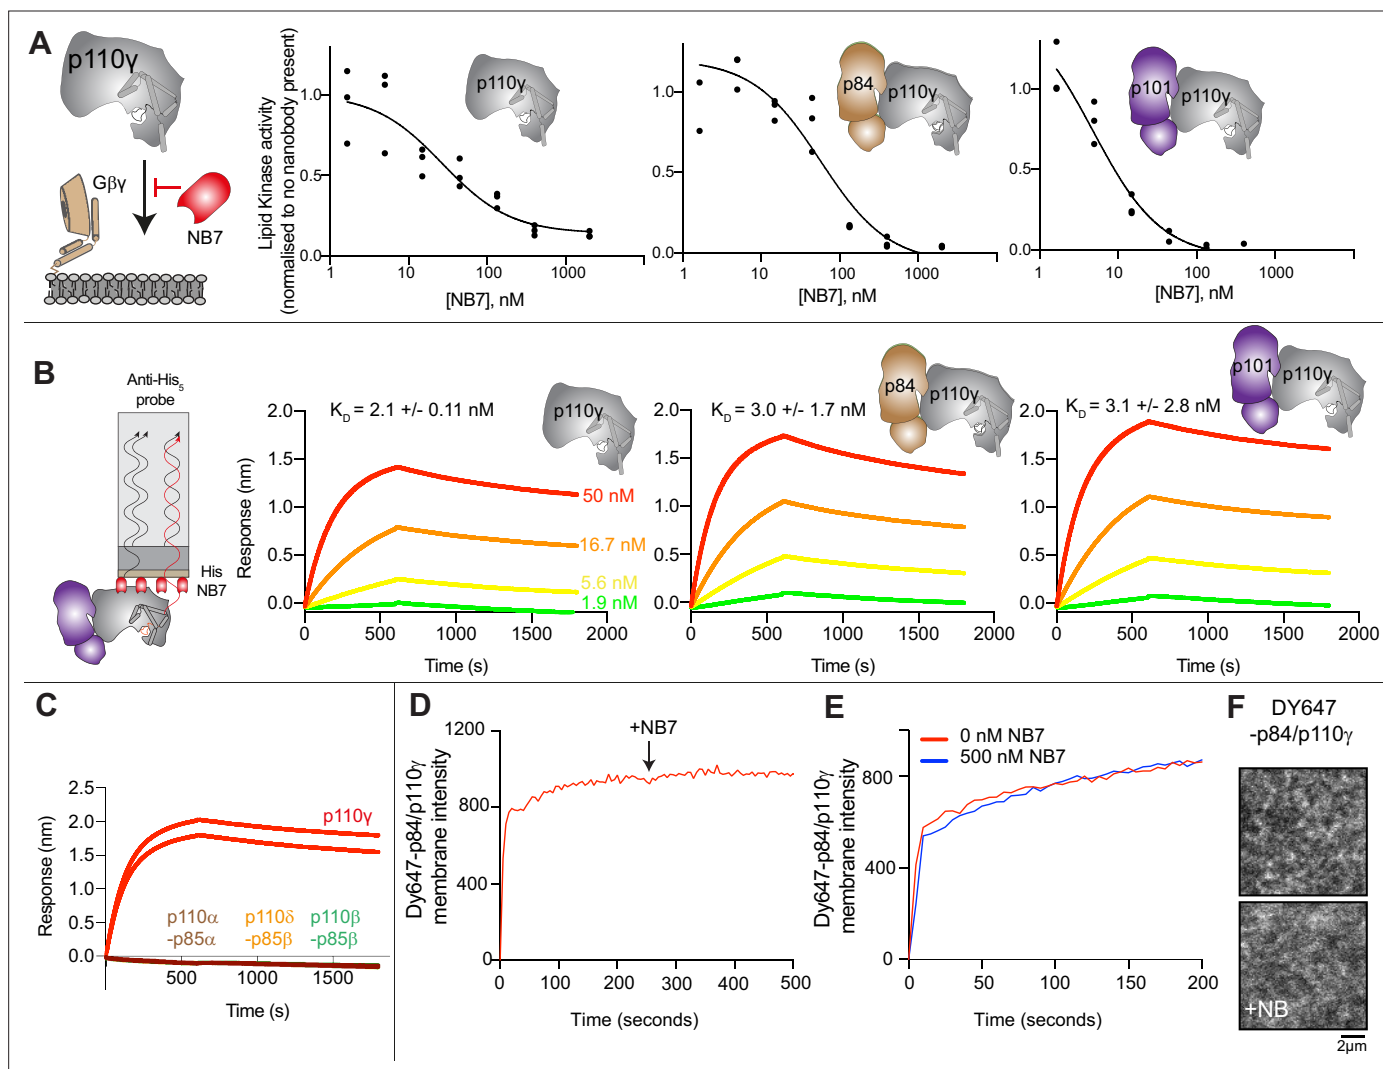

**Figure 1.** The inhibitory nanobody NB7 binds tightly to all p110 $\gamma$  complexes and inhibits kinase activity, but does not prevent membrane binding. **(A)** Cartoon schematic depicting nanobody inhibition of activation by lipidated G $\beta\gamma$  (1.5  $\mu$ M final concentration) on 5% PIP<sub>2</sub> membrane (5% phosphatidylinositol 4,5-bisphosphate [PIP<sub>2</sub>], 95% phosphatidylserine [PS]) activation. Lipid kinase assays showed a potent inhibition of lipid kinase activity with increasing concentrations of NB7 (3–3000 nM) for the different complexes. Experiments are carried out in triplicate ( $n=3$ ) with each replicate shown. The y-axis shows lipid kinase activity normalized for each complex activated by G $\beta\gamma$  in the absence of nanobody. Concentrations of each protein were selected to give a lipid kinase value in the detectable range of the ATPase Transcreeper assay. The protein concentration of p110 $\gamma$  (300 nM), p110 $\gamma$ -p84 (330 nM), and p110 $\gamma$ -p101 (12 nM) was different due to intrinsic differences of each complex to be activated by lipidated G $\beta\gamma$  and is likely mainly dependent for the difference seen in NB7 response. **(B)** Association and dissociation curves for the dose response of His-NB7 binding to p110 $\gamma$ , p110 $\gamma$ -p84, and p110 $\gamma$ -p101 (50–1.9 nM) are shown. A cartoon schematic of biolayer interferometry (BLI) analysis of the binding of immobilized His-NB7 to p110 $\gamma$  is shown on the left. Dissociation constants ( $K_D$ ) were calculated based on a global fit to a 1:1 model for the top three concentrations and averaged with error shown. Error was calculated from the association and dissociation value ( $n=3$ ) with standard deviation shown. Full details are present in **Source data 1**. **(C)** Association and dissociation curves for His-NB7 binding to p110 $\gamma$ , p110 $\alpha$ -p85, p110 $\beta$ -p85, and p110 $\delta$ -p85. Experiments were performed in duplicate with a final concentration of 50 nM of each class I phosphoinositide 3 kinase (PI3K) complex. **(D)** Effect of NB7 on PI3K $\gamma$  recruitment to supported lipid bilayers containing H-Ras (GTP) and farnesyl-G as measured by total internal reflection fluorescence microscopy (TIRF-M). DY647-p84/p110 $\gamma$  displays rapid equilibration kinetics and is insensitive to the addition of 500 nM nanobody (black arrow, 250 s) on supported lipid bilayers containing H-Ras (GTP) and farnesyl-G. **(E)** Kinetics of 50 nM DY647-p84/p110 $\gamma$  membrane recruitment appears indistinguishable in the absence and presence of nanobody. Prior to sample injection, DY647-p84/p110 $\gamma$  was incubated for 10 min with 500 nM nanobody. **(F)** Representative TIRF-M images showing the localization of 50 nM DY647-p84/p110 $\gamma$  visualized in the absence or presence of 500 nM nanobody (+NB7). Membrane composition for panels C–E: 93% DOPC, 5% DOPS, 2% MCC-PE, Ras (GTP) covalently attached to MCC-PE, and 200 nM farnesyl-G.

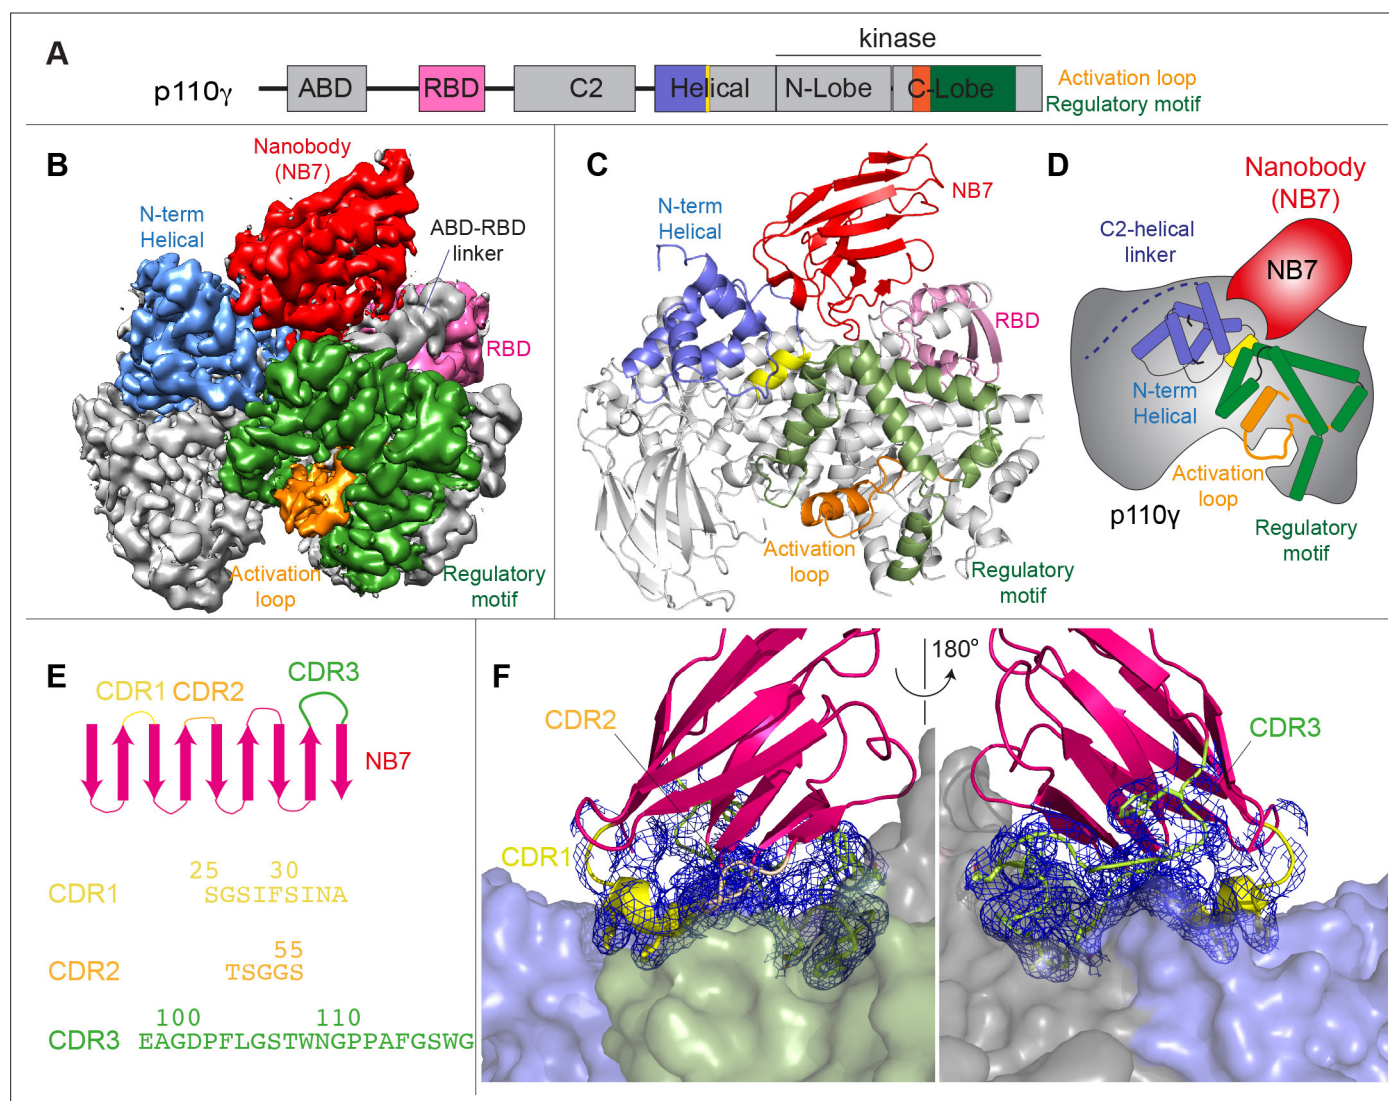

**Figure 2.** Structure of p110 $\gamma$  bound to inhibitory nanobody NB7. **(A)** Domain schematics of p110 $\gamma$  with helical domain (blue), activation loop (orange), and regulatory motif (green) of p110 $\gamma$  annotated. **(B)** Cryo electron microscopy (cryo-EM) density of the p110 $\gamma$ -NB7 complex colored according to the schematic in **(A)**. **(C)** Cartoon model of the structure of p110 $\gamma$  bound to NB7 colored according to **(A)**. **(D)** Schematic depicting the key features of p110 $\gamma$  and the nanobody binding site, colored according to panel **(A)**. **(E)** Domain schematic of NB7 complementarity determining regions (CDRs) and their sequences. **(F)** Zoom in on the binding interface of NB7, with the CDRs colored as in panel **E**, and the electron density of the CDRs contoured at 3 $\sigma$  (blue mesh).

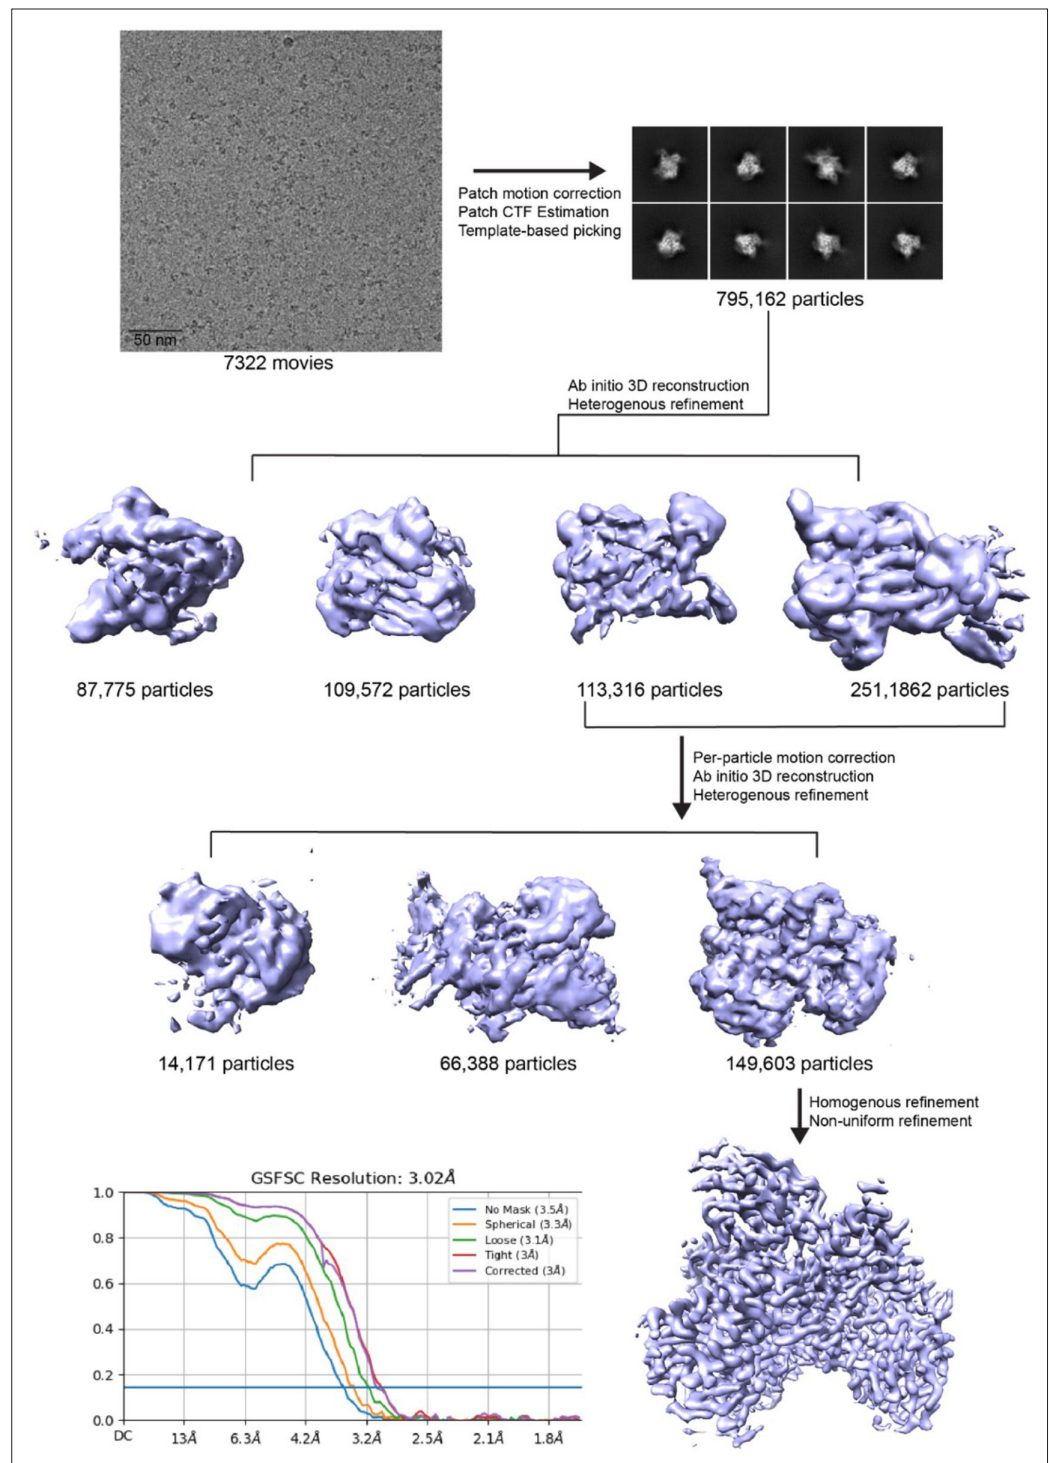

**Figure 2—figure supplement 1.** p110 $\gamma$ -NB7 complex cryo electron microscopy (cryo-EM) analysis workflow. Cryo-EM processing workflow of p110 $\gamma$ -NB7 complex is shown in order of a representative micrographs, representative 2D classification and 3D reconstruction processing strategy. Bottom left shows gold-standard Fourier shell correlation (FSC) curve of final round on non-uniform homogeneous refinement.



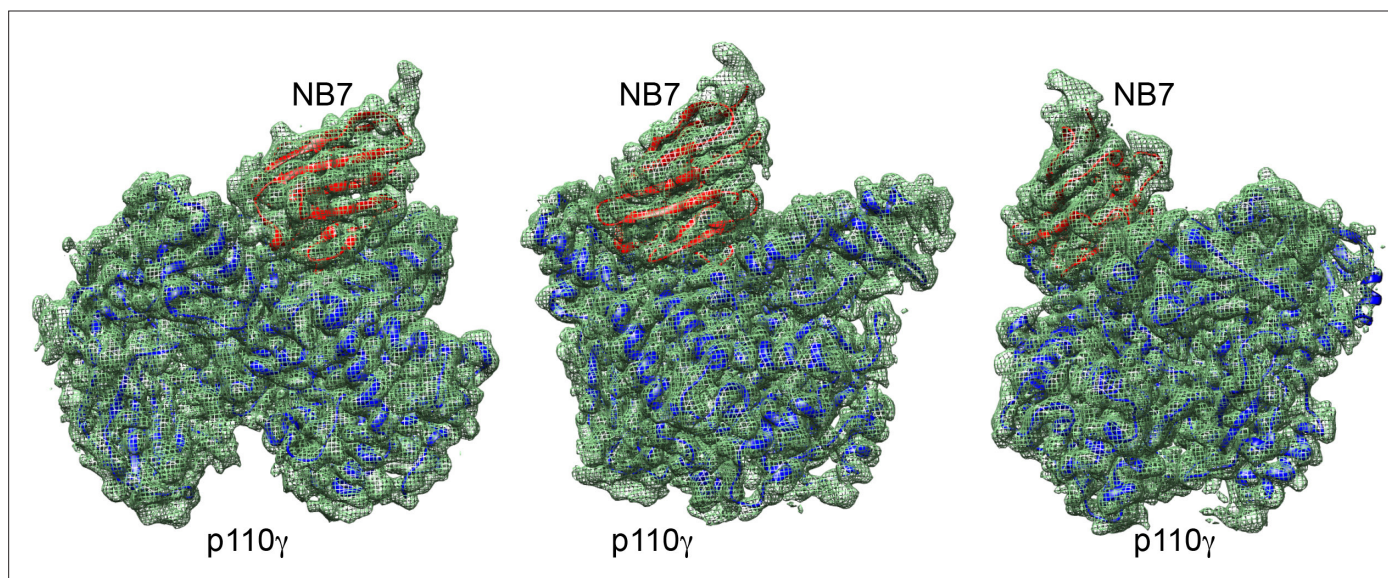

**Figure 2—figure supplement 2.** Density fit of p110 $\gamma$ -NB7 complex. Model of p110 $\gamma$  (blue)/NB7 (red) complex in different orientations is shown fit within the cryo electron microscopy (cryo-EM) density map (green mesh).

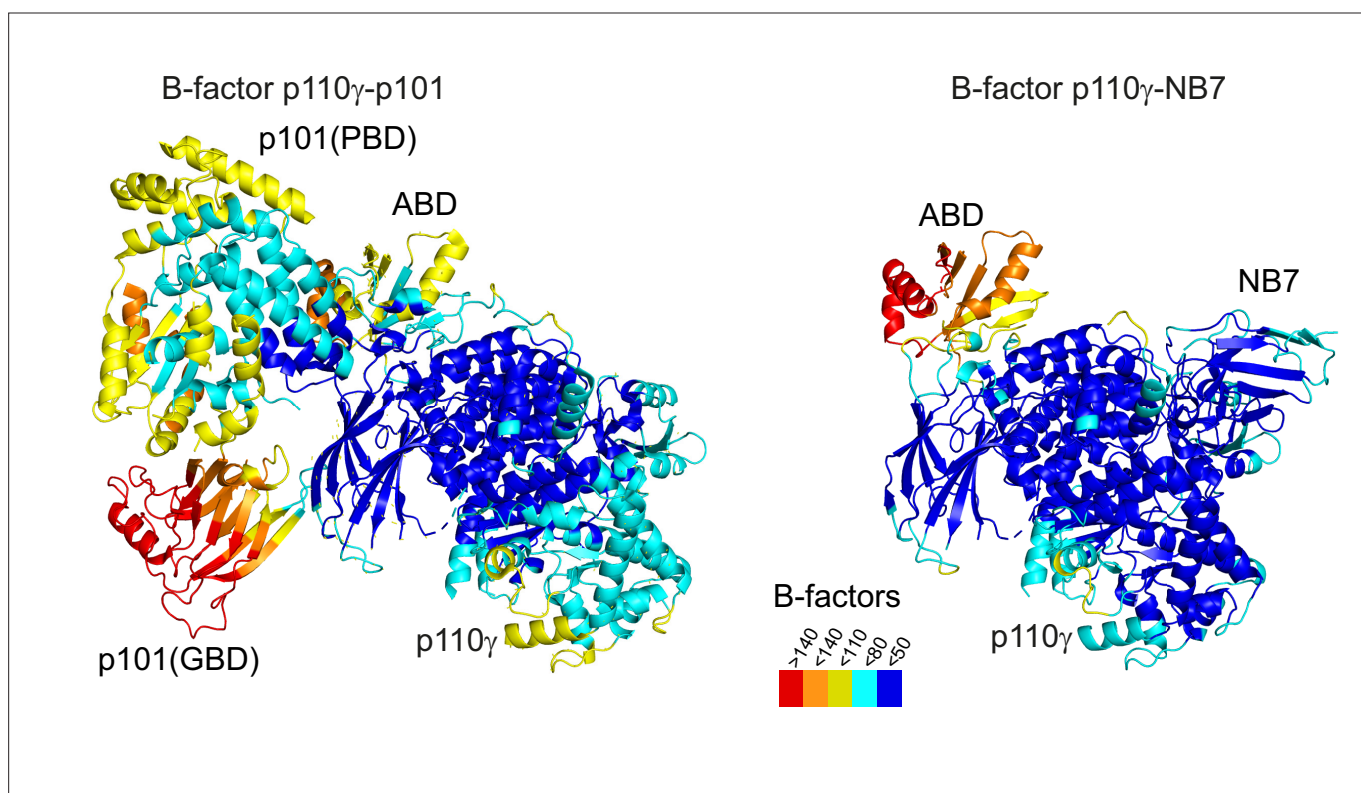

**Figure 2—figure supplement 3.** Comparison of full-length p110 $\gamma$  bound to NB7 compared to p110 $\gamma$ -p101. The structure of the p110 $\gamma$ -p101 complex (PDB: 7MEZ) compared to the NB7-p110 $\gamma$  complex is shown colored according to B-factor based on the legend.

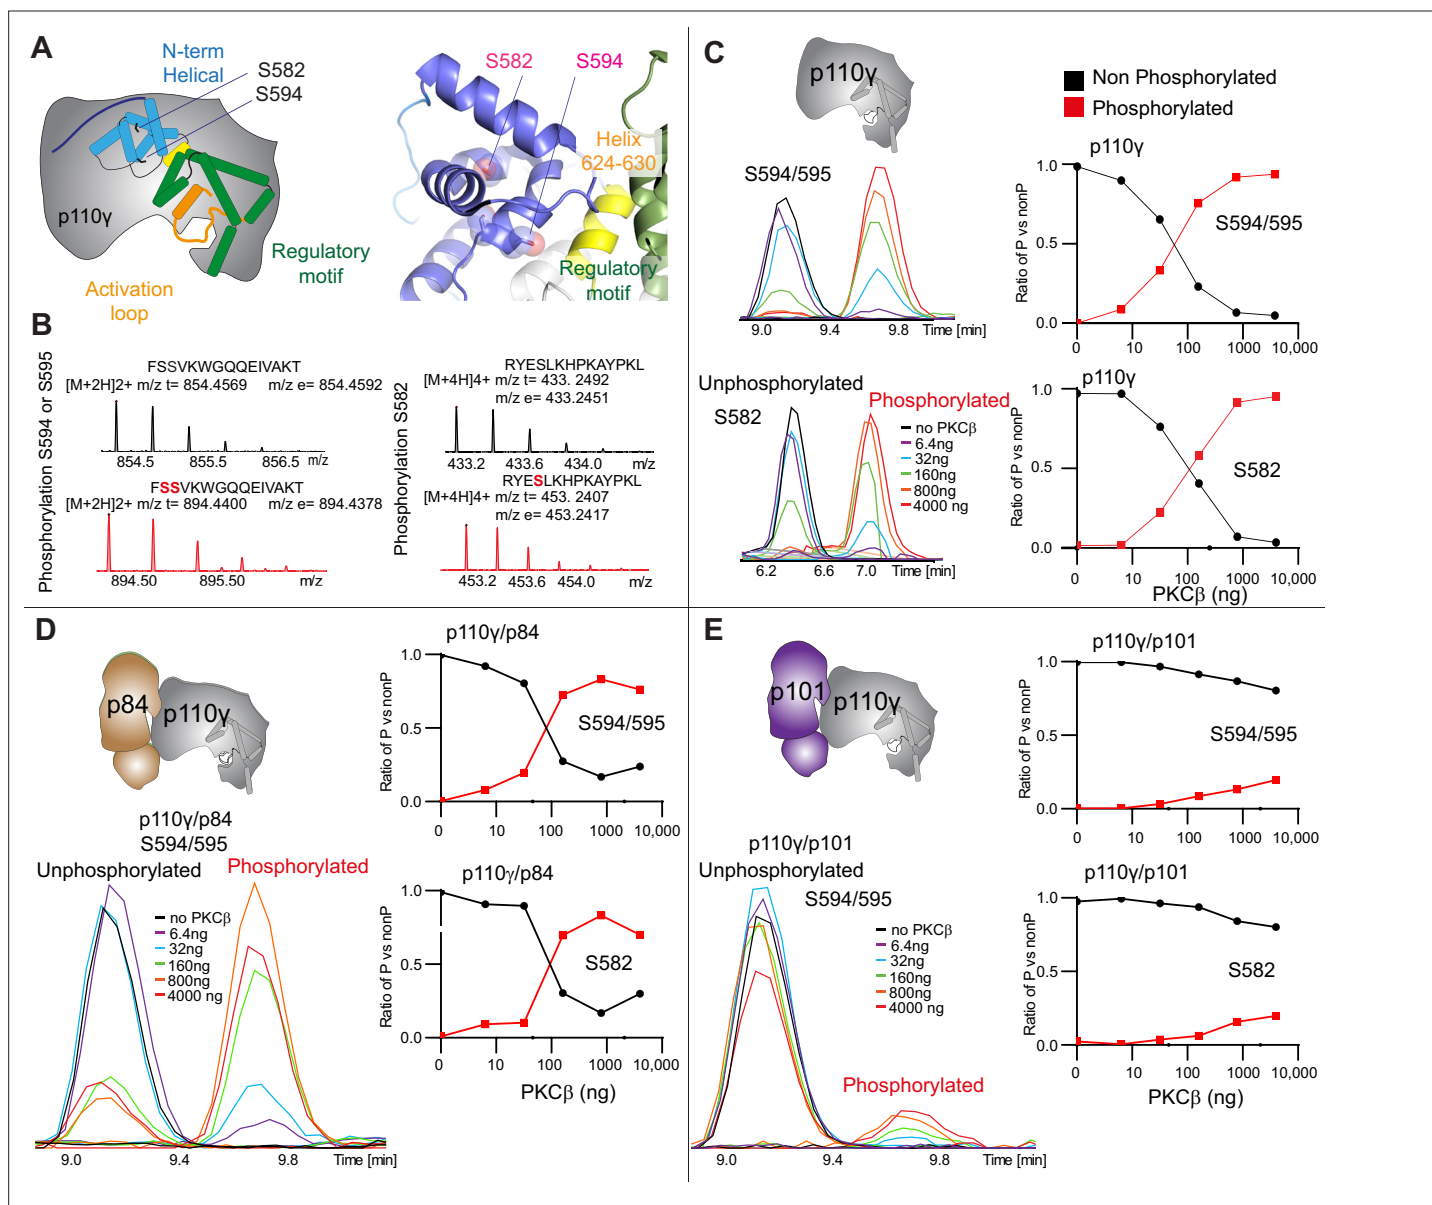

**Figure 3.** PKC $\beta$  leads to dual phosphorylation of internal sites in the helical domain, with selectivity for apo p110 $\gamma$  and p110 $\gamma$ -p84 over p110 $\gamma$ -p101. (A) Putative phosphorylation sites mapped on the structure of p110 $\gamma$  (PDB: 7MEZ) and cartoon schematic. The regions are colored based on domain schematics featured in **Figure 2A**. (B) Raw MS spectra of the unphosphorylated and phosphorylated peptide for a region spanning 579–592 (RYESLKHPKAYPKL) and 593–607 (FSSVKWGQEQEIVAKT). The putative phosphorylation sites in the sequence are shown in red, with the m/z theoretical (m/z t) and m/z experimental (m/z e) shown below each sequence. (C–E) Extracted traces and ratios of the intensity of extracted ion traces of different phosphorylation site peptides (top to bottom: S594/S595 and S582) from (C) p110 $\gamma$ , (D) p110 $\gamma$ /p84, or (E) p110 $\gamma$ /p101 samples treated with increasing concentration of PKC $\beta$  according to the legend. The black traces in the ratio graphs are the intensity of the non-phosphorylated peptide, and the red traces in the ratio graphs are the intensity of the phosphorylated peptide.

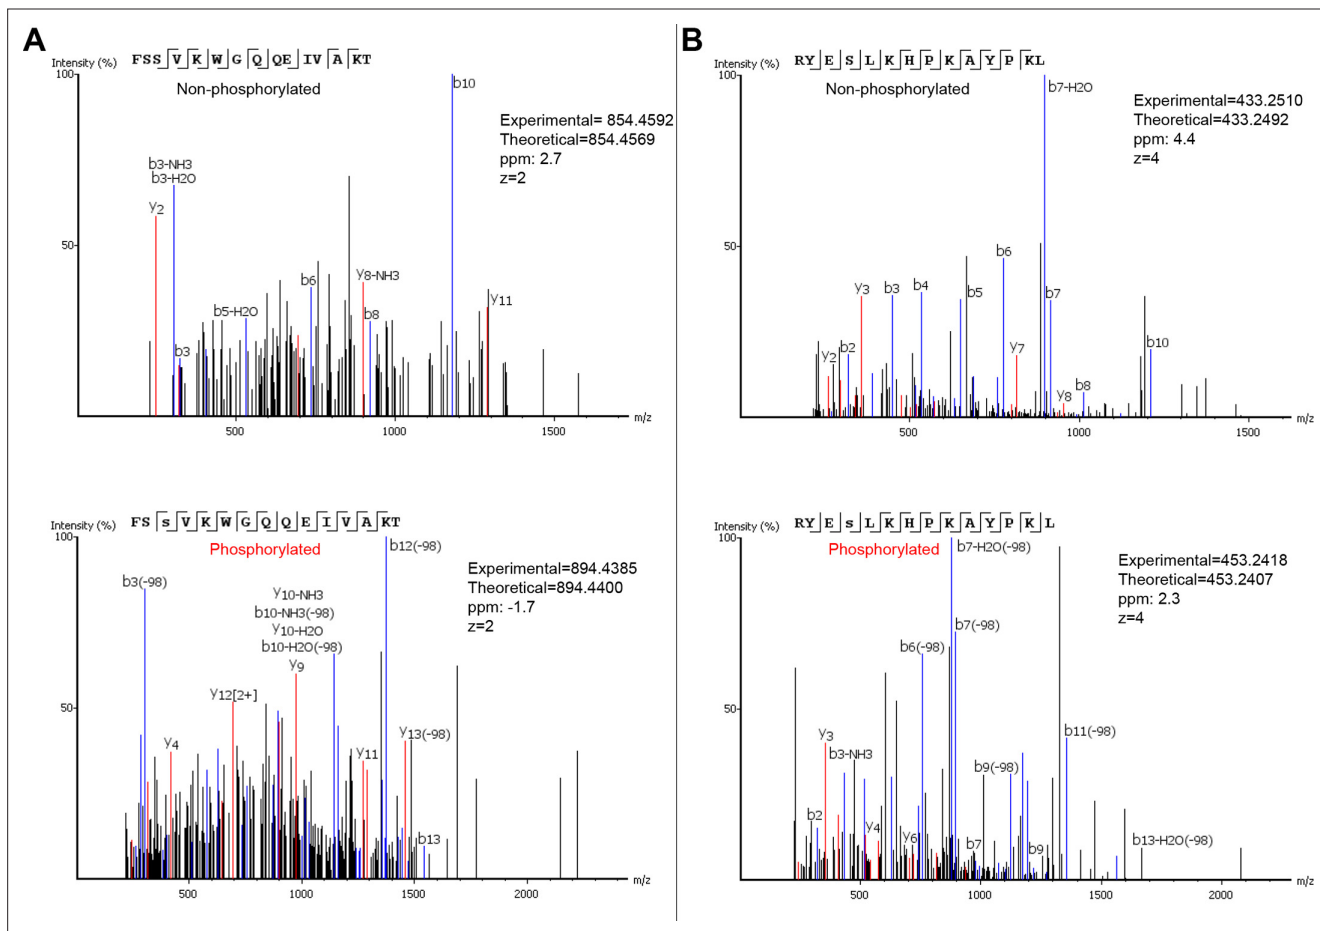

**Figure 3—figure supplement 1.** MS/MS spectra of peptides spanning S582 and S594/S595 for both phosphorylated and unphosphorylated states. The theoretical and experimental mass are annotated for all peptides.



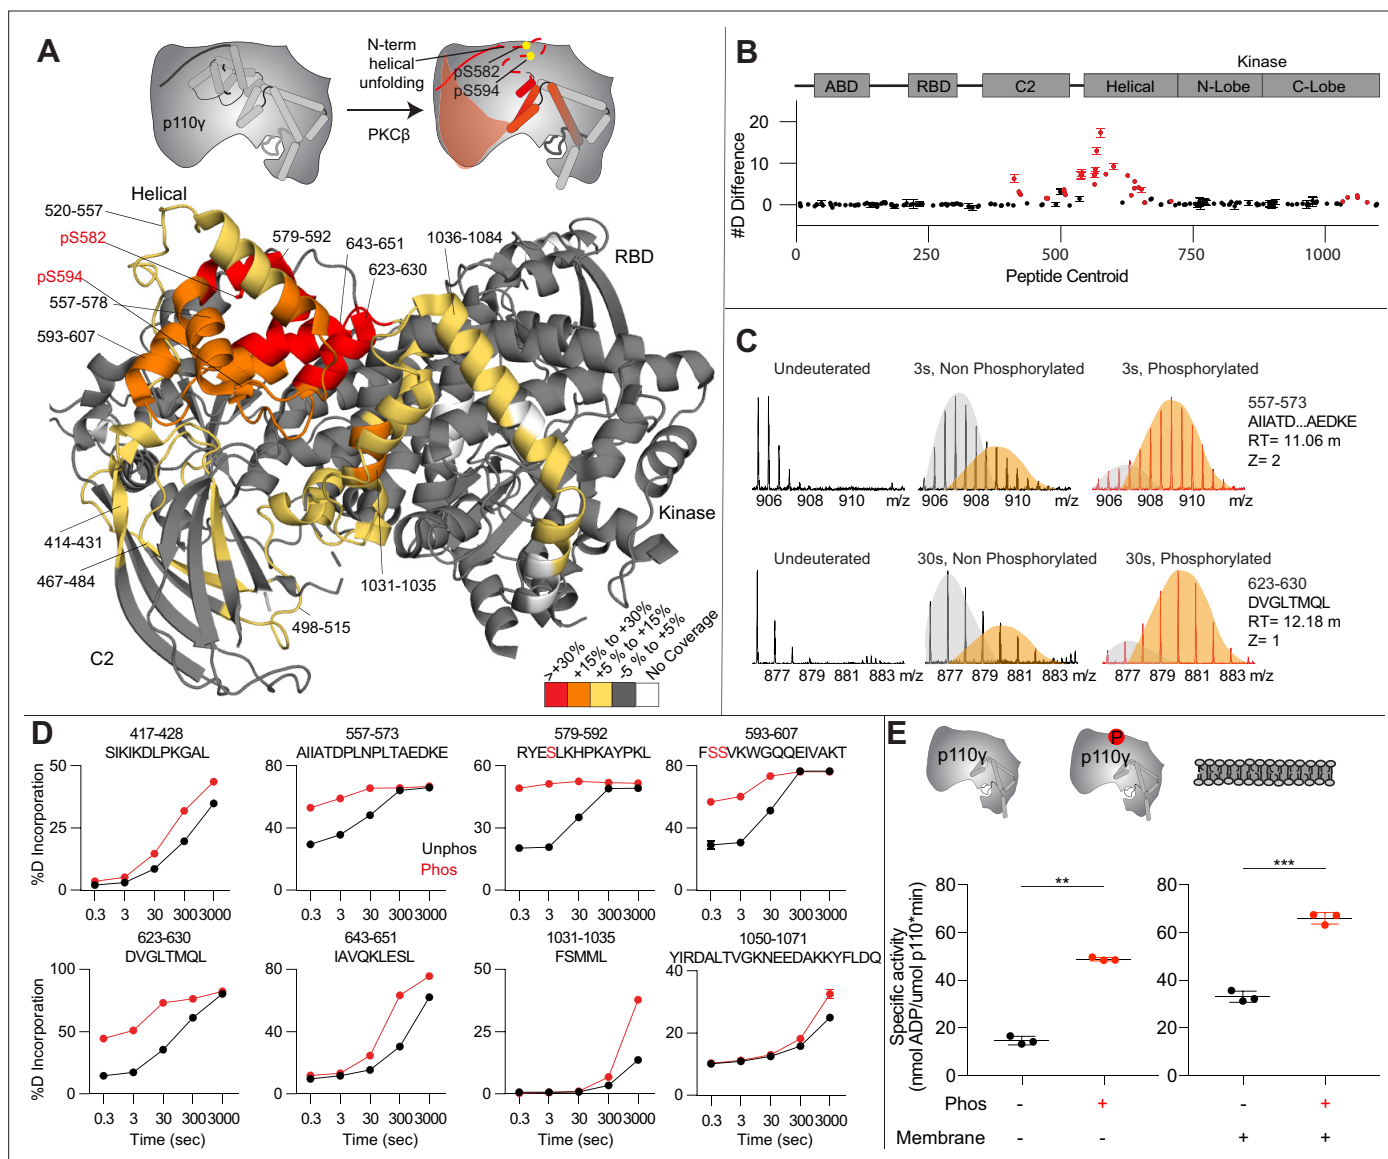

**Figure 4.** Activating phosphorylation at the helical domain leads to opening of the regulatory motif. **(A)** Hydrogen-deuterium exchange mass spectrometry (HDX-MS) comparing apo and phosphorylated p110γ. Significant differences in deuterium exchange are mapped on to the structure and cartoon of p110γ according to the legend (PDB: 7MEZ). **(B)** The graph of the #D difference in deuterium incorporation for p110γ, with each point representing a single peptide. Peptides colored in red are those that had a significant change in the mutants (greater than 0.4 Da and 5% difference at any time point, with a two tailed t-test  $p < 0.01$ ). Error bars are SD ( $n = 3$ ). **(C)** Representative bimodal distribution (EX1 kinetics) observed in the helical domain peptides of p110γ. **(D)** Representative p110γ peptides displaying increases in exchange in the phosphorylated state are shown. For all panels, error bars show SD ( $n = 3$ ). **(E)** Measurement of ATP to ADP conversion of phosphorylated and non-phosphorylated p110γ (1000 nM final concentration) ATPase activity in the absence (left) and presence of PIP<sub>2</sub> membranes (5% phosphatidylinositol 4,5-bisphosphate [PIP<sub>2</sub>], 95% phosphatidylserine [PS]) activation (right). Significance is indicated by \*\*(<0.001%) and \*\*\*(<0.0001%).

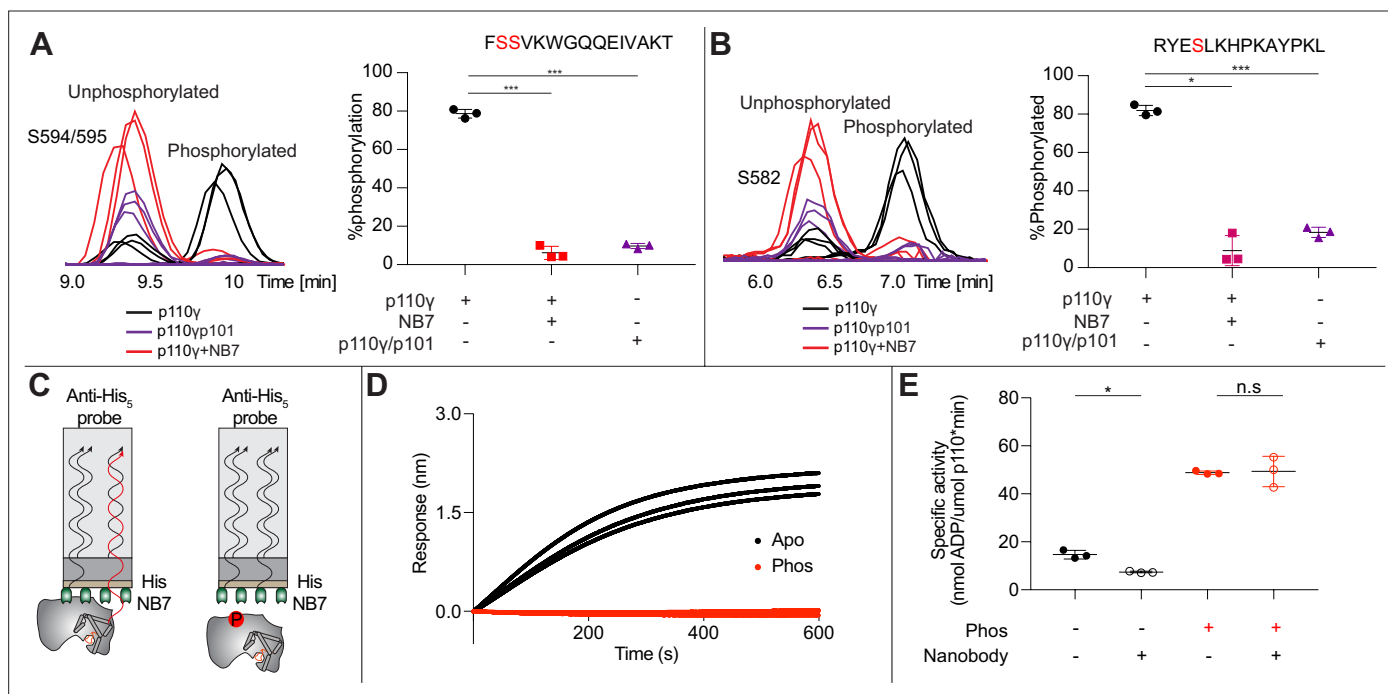

**Figure 5.** Nanobody NB7 blocks PKC $\beta$  phosphorylation, and phosphorylation prevents nanobody binding. **(A)** Extracted ion chromatograms for p110 $\gamma$ , p110 $\gamma$ -p101, and p110 $\gamma$  bound to NB7 are shown for the S594 or S595 phosphorylation site in p110 $\gamma$ . A bar graph showing the intensities of phosphorylated and non-phosphorylated p110 $\gamma$  peptide (593-607) for p110 $\gamma$  (black), p110 $\gamma$  with NB7 (red), and p110 $\gamma$ -p101 (purple) are shown to the right of the extracted ion chromatograms ( $n=3$ , right). In all experiments in panels A+B, PKC $\beta$  was present at 500 nM. Significance is indicated by \*\*\*(<0.0001%). **(B)** Extracted ion chromatograms for p110 $\gamma$ , p110 $\gamma$ -p101, and p110 $\gamma$  bound to NB7 are shown for the S582 phosphorylation site in p110 $\gamma$ . A bar graph showing the intensities of phosphorylated and non-phosphorylated p110 $\gamma$  peptide (579-592) p110 $\gamma$  (black), p110 $\gamma$  with NB7 (red), and p110 $\gamma$ -p101 (purple) are shown to the right of the extracted ion chromatograms ( $n=3$ , right). Significance is indicated by \*(<0.01%) and \*\*\*(<0.0001%). The putative phosphorylation site is shown in red in the sequence above the bar graphs for both panels A+B. **(C)** Cartoon schematic of biolayer interferometry (BLI) analysis of the binding of immobilized His-NB7 to phosphorylated and non-phosphorylated p110 $\gamma$ . **(D)** Association curves for phosphorylated and non-phosphorylated p110 $\gamma$  (25 nM) binding to His-NB7 are shown ( $n=3$ ). **(E)** ATPase kinase activity assays comparing the activation/inhibition of phosphorylated and non-phosphorylated p110 $\gamma$  (1000 nM) with or without nanobody (3000 nM final) in the absence of PIP<sub>2</sub> membranes. Significance is indicated by \*(<0.05%) and NS (>0.05%).

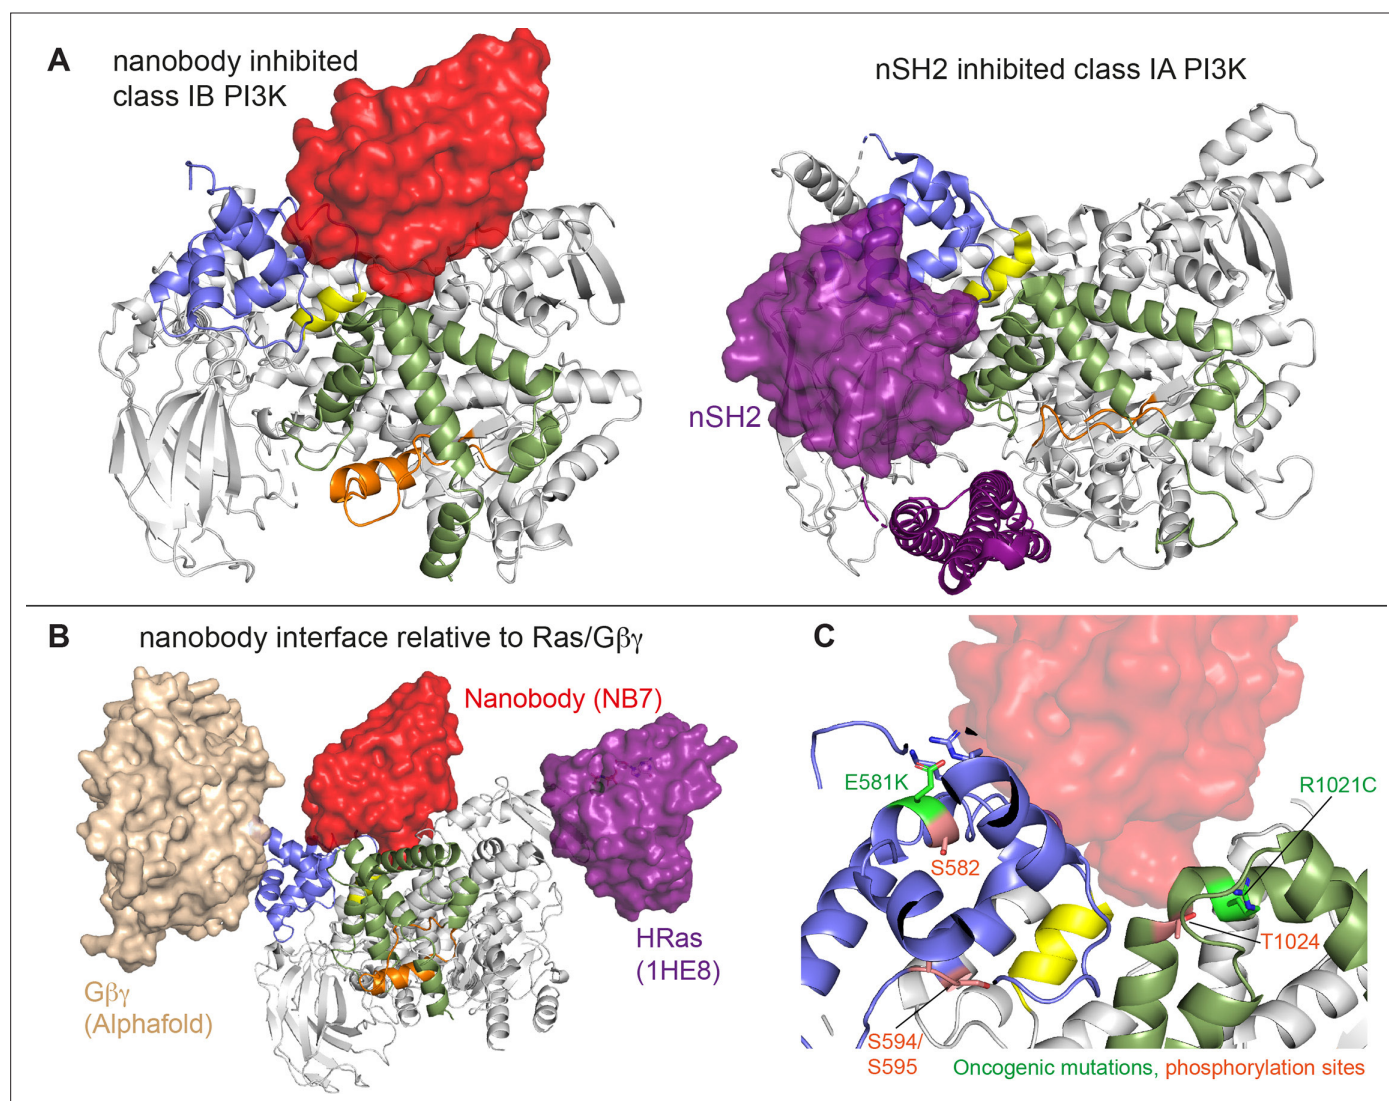

**Figure 6.** Comparison of nanobody binding site compared to p85 inhibition of class IA phosphoinositide 3 kinases (PI3Ks) and class IB activation sites. (A) Comparison of the nanobody NB7 binding site in p110γ compared to the nSH2 inhibitory site in p110α (PDB: 3HHM) (Mandelker et al., 2009). (B) Comparison of the nanobody NB7 binding site in p110γ compared to the X-ray structure of the Ras binding site (PDB: 1HE8) (Pacold et al., 2000) and the AlphaFold model of Gβγ bound to p110γ (Rathinaswamy et al., 2023). (C) Oncogenic mutations and post-translational modifications in spatial proximity to the nanobody binding site.
