# Supplementary material for: Allosteric activation or inhibition of PI3Kγ mediated through conformational changes in the p110γ helical domain
Source: eLife. 2023 Jul 7;12:RP88058. doi: 10.7554/eLife.88058 (PMC10392983; doi:10.7554/eLife.88058)
Supplement: Source data 1. [file elife-88058-data1.xlsx]

## Sheet: Fig1A_B_NB7_Assays_Octet
	p110g							p110g							p110gp84								p110gp84							Sensor Type	Conc. (nM)	Response	KD (M)	KD (error)	kon(1/Ms)	kdis(1/s)	kdis Error	RMax	kobs(1/s)	kobs Error	Req	Req Error	Req/Rmax(%)
	log([NB7]) nM	Fraction Maximal Activity						Time	50 nM	16.7 nM	5.6 nM	1.9 nM			Time	50 nM	16.7 nM	5.6 nM	1.9 nM				Time	50 nM	16.7 nM	5.6 nM	1.9 nM		p110g	HIS1K (Anti-Penta-HIS)	50	1.4024	2.03e-09	1.13137e-10	98800	0.0002	3.83e-07	1.5612	0.00514	4.13e-06	1.5004	0.0005	96.1
	3.30103	0.120278	0.154474	0.122629				0	-0.03523	-0.04132	-0.0414	-0.0415			0	-0.03376	-0.03871	-0.03979	-0.04822				0	-0.03491	-0.035	-0.03994	-0.04223			HIS1K (Anti-Penta-HIS)	16.7	0.7636	2.19e-09		105000	0.000231	3.97e-07	1.3211	0.00199	4.49e-06	1.1676	0.0017	88.4
	2.60206	0.128002	0.159201	0.190158				0.2	-0.03453	-0.04125	-0.04137	-0.04214			0.2	-0.03275	-0.0385	-0.03984	-0.04824				0.2	-0.03435	-0.03518	-0.04019	-0.04222			HIS1K (Anti-Penta-HIS)	5.6	0.2334				0.000627	1.59e-06		0.000304	1.26e-05	1.6778	0.0646
	2.12494	0.296575	0.38541	0.370174				0.4	-0.03365	-0.04085	-0.04161	-0.04292			0.4	-0.03187	-0.03798	-0.03997	-0.0484				0.4	-0.03324	-0.03513	-0.04023	-0.04281			HIS1K (Anti-Penta-HIS)	1.9	-0.0134
	1.64782	0.60501	0.484487	0.433777				0.6	-0.03303	-0.04047	-0.04155	-0.04348			0.6	-0.03056	-0.03719	-0.04004	-0.04834				0.6	-0.03191	-0.03511	-0.04029	-0.043		p110gp84	HIS1K (Anti-Penta-HIS)	50	1.7166	2.03e-09	1.72654e-09	113000	0.000229	4.4e-07	1.8649	0.00588	6.45e-06	1.7922	0.0007	96.1
	1.1707	0.494437	0.615621	0.660625				0.8	-0.03228	-0.04027	-0.04186	-0.04364			0.8	-0.02935	-0.03683	-0.04016	-0.04835				0.8	-0.03035	-0.03542	-0.04037	-0.04342			HIS1K (Anti-Penta-HIS)	16.7	1.0336	1.97e-09		129000	0.000255	4.64e-07	1.5846	0.00241	4.56e-06	1.417	0.0016	89.4
	0.693575	1.11906	0.637022	1.06289				1	-0.03107	-0.04016	-0.0421	-0.04419			1	-0.0279	-0.03644	-0.04025	-0.04834				1	-0.02822	-0.03513	-0.04077	-0.04403			HIS1K (Anti-Penta-HIS)	5.56	0.4608	4.99e-09		70400	0.000351	7.74e-07	2.6972	0.000742	9.81e-06	1.422	0.0159	52.7
	0.216454	1.14874	0.698573	0.98496				1.2	-0.02998	-0.04013	-0.04264	-0.04474			1.2	-0.02602	-0.03611	-0.04019	-0.04807				1.2	-0.02602	-0.0343	-0.04087	-0.04422			HIS1K (Anti-Penta-HIS)	1.85	0.0806				0.00139	1.97e-05		2.44e-06	4.01e-05	87.6565	1439.16
								1.4	-0.02843	-0.03996	-0.04292	-0.04494			1.4	-0.02417	-0.03526	-0.03996	-0.04842				1.4	-0.02376	-0.03374	-0.04043	-0.04422		p110gp101	HIS1K (Anti-Penta-HIS)	50	1.8711	1.36e-09	2.78372e-09	105000	0.000143	2.69e-07	2.0196	0.0054	8.7e-06	1.9661	0.0011	97.4
								1.6	-0.02709	-0.03972	-0.04318	-0.04511			1.6	-0.02249	-0.03477	-0.03974	-0.04825				1.6	-0.02165	-0.03334	-0.04035	-0.04443			HIS1K (Anti-Penta-HIS)	16.7	1.0866	1.65e-09		111000	0.000184	3.41e-07	1.7696	0.00204	5.78e-06	1.6101	0.0029	91
	p110gp84							1.8	-0.02571	-0.03933	-0.04319	-0.04552			1.8	-0.02046	-0.03432	-0.03999	-0.04796				1.8	-0.01944	-0.03287	-0.03987	-0.04469			HIS1K (Anti-Penta-HIS)	5.56	0.4444	6.32e-09		50200	0.000317	7.51e-07	3.5176	0.000597	1.05e-05	1.6465	0.0253	46.8
	log([NB7]) nM	Fraction Maximal Activity						2	-0.02438	-0.0393	-0.04308	-0.04569			2	-0.01845	-0.03341	-0.0403	-0.04766				2	-0.01731	-0.03215	-0.03967	-0.04476			HIS1K (Anti-Penta-HIS)	1.85	0.0503				0.00211	7.03e-05		7.91e-07	0.000114	180.98	26070.8
	3.30103	0.043319	0.038052	0.034078				2.2	-0.02294	-0.03892	-0.04295	-0.04538			2.2	-0.01649	-0.03246	-0.04042	-0.04722				2.2	-0.01515	-0.03152	-0.03934	-0.04459
	2.60206	0.038563	0.09942	0.049607				2.4	-0.02103	-0.03863	-0.04314	-0.04584			2.4	-0.01444	-0.03238	-0.0408	-0.04784				2.4	-0.01326	-0.03137	-0.03915	-0.04493
	2.12494	0.162943	0.158174	0.171849				2.6	-0.01928	-0.03861	-0.04349	-0.04604			2.6	-0.01252	-0.03194	-0.04115	-0.04777				2.6	-0.01075	-0.03012	-0.03905	-0.04535
	1.64782	0.834401	0.626701	0.961725				2.8	-0.01792	-0.03837	-0.04392	-0.04608			2.8	-0.01063	-0.0314	-0.04116	-0.04798				2.8	-0.00826	-0.02974	-0.03886	-0.04534
	1.1707	0.941091	0.819174	0.919708				3	-0.01665	-0.03798	-0.04373	-0.04629			3	-0.0086	-0.03112	-0.04148	-0.04855				3	-0.00592	-0.02895	-0.03913	-0.04512
	0.693575	1.01385	1.19987	1.19606				3.2	-0.01548	-0.0375	-0.04375	-0.04625			3.2	-0.00671	-0.03056	-0.04163	-0.04908				3.2	-0.00341	-0.02836	-0.03966	-0.04527
	0.216454	0.756614	1.57002	1.05781				3.4	-0.01383	-0.03702	-0.04297	-0.0466			3.4	-0.00502	-0.03001	-0.04165	-0.04959				3.4	-0.00157	-0.02751	-0.0399	-0.04539
								3.6	-0.01186	-0.03685	-0.04269	-0.04634			3.6	-0.00254	-0.02956	-0.04136	-0.05006				3.6	0.000442	-0.02731	-0.03989	-0.0453
								3.8	-0.01016	-0.03661	-0.0427	-0.04661			3.8	-0.00047	-0.02852	-0.04137	-0.04998				3.8	0.002191	-0.02667	-0.04023	-0.04485
	p110gp101							4	-0.00821	-0.0363	-0.04251	-0.04662			4	0.0017	-0.02819	-0.04098	-0.05015				4	0.004174	-0.0262	-0.04042	-0.04485
	log([NB7]) nM	Fraction Maximal Activity						4.2	-0.00654	-0.03661	-0.04212	-0.04668			4.2	0.00418	-0.02696	-0.04053	-0.04992				4.2	0.006087	-0.02582	-0.04053	-0.04521
	3.30103							4.4	-0.00513	-0.03619	-0.04183	-0.04647			4.4	0.006518	-0.02583	-0.04039	-0.05027				4.4	0.008338	-0.0258	-0.04049	-0.04575
	2.60206			0.037884				4.6	-0.00383	-0.03592	-0.0417	-0.04604			4.6	0.008817	-0.02479	-0.04035	-0.0504				4.6	0.00996	-0.02554	-0.04051	-0.04575
	2.12494		0.031769	0.011388				4.8	-0.00226	-0.03596	-0.04208	-0.04542			4.8	0.010836	-0.02437	-0.03991	-0.05091				4.8	0.01218	-0.02491	-0.0406	-0.0464
	1.64782		0.051601	0.117907				5	-0.00086	-0.03607	-0.04226	-0.04579			5	0.013181	-0.0238	-0.03913	-0.05097				5	0.014104	-0.0239	-0.04062	-0.04691
	1.1707	0.23955	0.345589	0.228319				5.2	-5.8e-05	-0.03612	-0.04284	-0.04574			5.2	0.015487	-0.02311	-0.03817	-0.05073				5.2	0.015725	-0.02285	-0.04022	-0.04686
	0.693575	0.657964	0.919985	0.802058				5.4	0.00168	-0.03563	-0.043	-0.04602			5.4	0.017221	-0.02211	-0.03754	-0.05062				5.4	0.017304	-0.02231	-0.03968	-0.04729
	0.216454	1.00749	1.29211	1.00068				5.6	0.002903	-0.03522	-0.04306	-0.04632			5.6	0.019489	-0.02156	-0.03738	-0.05002				5.6	0.019067	-0.02166	-0.03986	-0.0477
								5.8	0.003857	-0.03471	-0.04284	-0.04672			5.8	0.02183	-0.02095	-0.03741	-0.04996				5.8	0.020673	-0.02085	-0.03918	-0.04843
								6	0.005226	-0.03429	-0.04301	-0.04669			6	0.023791	-0.01985	-0.03742	-0.04999				6	0.022409	-0.02043	-0.03914	-0.04862
								6.2	0.006792	-0.03342	-0.04332	-0.0467			6.2	0.025908	-0.01907	-0.03713	-0.05008				6.2	0.024496	-0.02035	-0.0389	-0.04859
								6.4	0.008485	-0.03311	-0.04289	-0.04673			6.4	0.027828	-0.01891	-0.03728	-0.05054				6.4	0.026831	-0.02005	-0.03904	-0.04894
								6.6	0.010001	-0.03219	-0.04304	-0.04717			6.6	0.02984	-0.01846	-0.03764	-0.05033				6.6	0.029325	-0.01931	-0.03886	-0.04901
								6.8	0.011035	-0.0315	-0.04316	-0.04718			6.8	0.031676	-0.01826	-0.03743	-0.05043				6.8	0.031391	-0.01852	-0.0388	-0.04919
								7	0.012505	-0.03051	-0.04321	-0.04729			7	0.033537	-0.01755	-0.03783	-0.05036				7	0.033171	-0.01759	-0.03885	-0.04918
								7.2	0.014015	-0.03002	-0.04318	-0.0473			7.2	0.035306	-0.01676	-0.03767	-0.0504				7.2	0.035099	-0.01651	-0.0392	-0.04944
								7.4	0.016021	-0.02919	-0.04269	-0.04808			7.4	0.037154	-0.01641	-0.03735	-0.04997				7.4	0.036877	-0.0153	-0.03892	-0.04916
								7.6	0.018053	-0.0288	-0.04242	-0.04823			7.6	0.039323	-0.01562	-0.03734	-0.04997				7.6	0.039304	-0.01507	-0.03932	-0.04881
								7.8	0.020139	-0.02846	-0.04246	-0.04833			7.8	0.041224	-0.01519	-0.03763	-0.04947				7.8	0.041381	-0.01463	-0.03914	-0.04851
								8	0.021798	-0.02784	-0.04211	-0.04792			8	0.042862	-0.01544	-0.03707	-0.04962				8	0.04368	-0.01453	-0.03909	-0.04864
								8.2	0.023465	-0.02749	-0.04177	-0.04784			8.2	0.045018	-0.0145	-0.0373	-0.04952				8.2	0.046302	-0.01429	-0.03871	-0.04855
								8.4	0.024881	-0.02683	-0.04148	-0.04809			8.4	0.047121	-0.01392	-0.03713	-0.05005				8.4	0.048255	-0.01412	-0.03871	-0.0484
								8.6	0.026585	-0.02668	-0.04136	-0.04808			8.6	0.048795	-0.01321	-0.03709	-0.05012				8.6	0.050235	-0.01348	-0.03842	-0.04855
								8.8	0.027709	-0.0262	-0.0412	-0.04823			8.8	0.050837	-0.01279	-0.03659	-0.0501				8.8	0.05277	-0.01302	-0.03798	-0.04879
								9	0.028671	-0.02588	-0.04082	-0.04835			9	0.053053	-0.0124	-0.03638	-0.05002				9	0.05473	-0.01279	-0.03771	-0.04912
								9.2	0.03028	-0.0261	-0.04086	-0.04858			9.2	0.05495	-0.01167	-0.03598	-0.04963				9.2	0.05701	-0.01231	-0.03755	-0.04898
								9.4	0.031956	-0.02595	-0.04038	-0.04879			9.4	0.057303	-0.01125	-0.03596	-0.04927				9.4	0.059074	-0.01186	-0.03716	-0.04919
								9.6	0.033639	-0.02563	-0.04009	-0.04869			9.6	0.059641	-0.01071	-0.03611	-0.04959				9.6	0.061473	-0.01164	-0.03703	-0.0494
								9.8	0.034702	-0.02513	-0.03984	-0.04887			9.8	0.061433	-0.01046	-0.03596	-0.05002				9.8	0.063556	-0.01169	-0.03638	-0.04975
								10	0.036378	-0.02461	-0.03977	-0.04908			10	0.063366	-0.00992	-0.03574	-0.05014				10	0.065969	-0.01184	-0.03595	-0.04966
								10.2	0.037743	-0.02432	-0.03924	-0.04892			10.2	0.065261	-0.00945	-0.0354	-0.05018				10.2	0.068232	-0.01112	-0.03598	-0.04965
								10.4	0.039358	-0.02413	-0.03886	-0.04865			10.4	0.066711	-0.00916	-0.03494	-0.05016				10.4	0.070518	-0.01039	-0.03595	-0.04954
								10.6	0.04073	-0.02398	-0.039	-0.0485			10.6	0.068489	-0.00898	-0.03477	-0.04993				10.6	0.072439	-0.00963	-0.03599	-0.04944
								10.8	0.042061	-0.02372	-0.039	-0.04799			10.8	0.069937	-0.00804	-0.03414	-0.04975				10.8	0.074389	-0.00859	-0.03595	-0.04939
								11	0.043658	-0.02345	-0.03897	-0.04828			11	0.07186	-0.00708	-0.03404	-0.04943				11	0.076183	-0.0074	-0.03604	-0.04919
								11.2	0.045183	-0.02315	-0.03887	-0.04839			11.2	0.073605	-0.00673	-0.0333	-0.04941				11.2	0.078163	-0.00646	-0.03599	-0.04912
								11.4	0.046973	-0.02263	-0.0391	-0.04874			11.4	0.075664	-0.00646	-0.03297	-0.04887				11.4	0.079832	-0.00596	-0.03571	-0.04873
								11.6	0.048462	-0.02237	-0.03894	-0.04861			11.6	0.077398	-0.00562	-0.03273	-0.0489				11.6	0.081628	-0.00539	-0.03604	-0.0482
								11.8	0.050286	-0.02222	-0.0391	-0.04859			11.8	0.078972	-0.00558	-0.03243	-0.04844				11.8	0.083427	-0.00473	-0.03593	-0.04827
								12	0.051784	-0.02162	-0.03889	-0.04872			12	0.080272	-0.00544	-0.03169	-0.04835				12	0.085275	-0.00414	-0.03589	-0.0481
								12.2	0.053113	-0.0209	-0.03898	-0.04922			12.2	0.082572	-0.00407	-0.03143	-0.04797				12.2	0.086845	-0.00255	-0.03574	-0.04797
								12.4	0.054338	-0.02069	-0.0386	-0.04966			12.4	0.08438	-0.00361	-0.03115	-0.04807				12.4	0.088532	-0.00162	-0.03538	-0.0482
								12.6	0.055599	-0.02001	-0.03833	-0.04935			12.6	0.086265	-0.0026	-0.03147	-0.04827				12.6	0.090174	-0.00057	-0.03507	-0.04847
								12.8	0.056746	-0.01902	-0.0382	-0.04938			12.8	0.088393	-0.00238	-0.03116	-0.04816				12.8	0.091952	-0.00016	-0.0346	-0.04831
								13	0.058038	-0.01871	-0.03776	-0.04901			13	0.090616	-0.00192	-0.0317	-0.04861				13	0.093721	0.000476	-0.03455	-0.04864
								13.2	0.059163	-0.0185	-0.03798	-0.04909			13.2	0.092387	-0.00126	-0.03159	-0.04868				13.2	0.095516	0.001219	-0.03393	-0.04847
								13.4	0.05985	-0.0179	-0.03784	-0.0486			13.4	0.094948	-0.001	-0.03214	-0.04869				13.4	0.097372	0.0018	-0.0337	-0.0487
								13.6	0.061406	-0.01708	-0.03792	-0.04889			13.6	0.096836	-0.00011	-0.0321	-0.04925				13.6	0.099157	0.002118	-0.03326	-0.04908
								13.8	0.06208	-0.01676	-0.03779	-0.04891			13.8	0.098909	0.000248	-0.03225	-0.04977				13.8	0.10115	0.002346	-0.03271	-0.04896
								14	0.063324	-0.01638	-0.03772	-0.04834			14	0.10133	0.001032	-0.03234	-0.04965				14	0.102926	0.003138	-0.03243	-0.04917
								14.2	0.06481	-0.01611	-0.03799	-0.04741			14.2	0.103239	0.001594	-0.03234	-0.04957				14.2	0.105023	0.00409	-0.03259	-0.04913
								14.4	0.066651	-0.01599	-0.03791	-0.04681			14.4	0.105358	0.002152	-0.03196	-0.04974				14.4	0.107326	0.004719	-0.03208	-0.04882
								14.6	0.068286	-0.01554	-0.0378	-0.0463			14.6	0.107711	0.002626	-0.03196	-0.04997				14.6	0.109087	0.005377	-0.03192	-0.04899
								14.8	0.069911	-0.01463	-0.03798	-0.04649			14.8	0.109929	0.003624	-0.03158	-0.05041				14.8	0.111439	0.006394	-0.03186	-0.04926
								15	0.071392	-0.01418	-0.03801	-0.04653			15	0.111981	0.004465	-0.03127	-0.05063				15	0.113536	0.007146	-0.03178	-0.04941
								15.2	0.073126	-0.01358	-0.03858	-0.04673			15.2	0.113902	0.004968	-0.03071	-0.05054				15.2	0.115621	0.007134	-0.03145	-0.04964
								15.4	0.075005	-0.01322	-0.03848	-0.04665			15.4	0.115679	0.005816	-0.03011	-0.05058				15.4	0.117922	0.007249	-0.03128	-0.04946
								15.6	0.076666	-0.01297	-0.0381	-0.04675			15.6	0.117264	0.007078	-0.02932	-0.05058				15.6	0.120448	0.008105	-0.03169	-0.04953
								15.8	0.078493	-0.01255	-0.0381	-0.04669			15.8	0.118688	0.007563	-0.02873	-0.05032				15.8	0.122592	0.008426	-0.03177	-0.04975
								16	0.080231	-0.0118	-0.03801	-0.04687			16	0.120217	0.00855	-0.02844	-0.05066				16	0.124979	0.009049	-0.03167	-0.04954
								16.2	0.081977	-0.0113	-0.0377	-0.04703			16.2	0.121893	0.009239	-0.02814	-0.0504				16.2	0.126726	0.010201	-0.03171	-0.04956
								16.4	0.083762	-0.01101	-0.03701	-0.04739			16.4	0.123533	0.009494	-0.02791	-0.05029				16.4	0.128789	0.010816	-0.0317	-0.04966
								16.6	0.085065	-0.01027	-0.03697	-0.04749			16.6	0.125591	0.010657	-0.02743	-0.05051				16.6	0.130814	0.011399	-0.03204	-0.04962
								16.8	0.086456	-0.00987	-0.03673	-0.04727			16.8	0.127569	0.011304	-0.02685	-0.05023				16.8	0.132999	0.011193	-0.03207	-0.05
								17	0.087638	-0.00983	-0.03638	-0.04719			17	0.12936	0.012323	-0.02686	-0.05031				17	0.13527	0.011734	-0.03177	-0.05004
								17.2	0.088826	-0.0096	-0.03666	-0.04728			17.2	0.131225	0.01334	-0.02664	-0.04991				17.2	0.136771	0.012032	-0.03165	-0.05007
								17.4	0.09	-0.00961	-0.03703	-0.04757			17.4	0.133652	0.013957	-0.02663	-0.04976				17.4	0.138708	0.012225	-0.03173	-0.05014
								17.6	0.091499	-0.00952	-0.0372	-0.04801			17.6	0.135611	0.014766	-0.02652	-0.04939				17.6	0.140076	0.012723	-0.03163	-0.04997
								17.8	0.09278	-0.00922	-0.03778	-0.04821			17.8	0.138218	0.015225	-0.0274	-0.04928				17.8	0.141911	0.013354	-0.03188	-0.0493
								18	0.094384	-0.00857	-0.03834	-0.04804			18	0.140519	0.016191	-0.02768	-0.04873				18	0.143695	0.014168	-0.03164	-0.04922
								18.2	0.096443	-0.00813	-0.0387	-0.04816			18.2	0.142398	0.016677	-0.02765	-0.04854				18.2	0.145719	0.014742	-0.03093	-0.04888
								18.4	0.098215	-0.00748	-0.03871	-0.0483			18.4	0.144704	0.017496	-0.02756	-0.0487				18.4	0.147117	0.015377	-0.03044	-0.0486
								18.6	0.099612	-0.00664	-0.03937	-0.04844			18.6	0.146978	0.018153	-0.0276	-0.04868				18.6	0.148833	0.015662	-0.03051	-0.04855
								18.8	0.100647	-0.00588	-0.03977	-0.04893			18.8	0.149329	0.018693	-0.02746	-0.04864				18.8	0.151046	0.016383	-0.03032	-0.04874
								19	0.101938	-0.00531	-0.03968	-0.04882			19	0.151238	0.020262	-0.02761	-0.04813				19	0.153148	0.017022	-0.02987	-0.04844
								19.2	0.103347	-0.00469	-0.04061	-0.04927			19.2	0.153092	0.020948	-0.02758	-0.0477				19.2	0.15545	0.017712	-0.02964	-0.0483
								19.4	0.104609	-0.00422	-0.04046	-0.04908			19.4	0.15457	0.021504	-0.02732	-0.04789				19.4	0.157987	0.018453	-0.0298	-0.04806
								19.6	0.105718	-0.00392	-0.0408	-0.04918			19.6	0.156535	0.022401	-0.02722	-0.04766				19.6	0.160115	0.019557	-0.02963	-0.04816
								19.8	0.107071	-0.00288	-0.04084	-0.04896			19.8	0.15797	0.022621	-0.0271	-0.04761				19.8	0.162009	0.020428	-0.02917	-0.04809
								20	0.108599	-0.00227	-0.04019	-0.04884			20	0.159663	0.023368	-0.02706	-0.04786				20	0.164025	0.021452	-0.02886	-0.04817
								20.2	0.109938	-0.00159	-0.03966	-0.0489			20.2	0.161413	0.023525	-0.02655	-0.04729				20.2	0.165132	0.022399	-0.02875	-0.04861
								20.4	0.111212	-0.00103	-0.03917	-0.04877			20.4	0.163714	0.024034	-0.02597	-0.04736				20.4	0.167342	0.023126	-0.02838	-0.04888
								20.6	0.112509	-0.00086	-0.03872	-0.0483			20.6	0.16549	0.024423	-0.02546	-0.04755				20.6	0.169332	0.023487	-0.02833	-0.04941
								20.8	0.11381	-0.00069	-0.03789	-0.04741			20.8	0.167178	0.024978	-0.02529	-0.04756				20.8	0.171076	0.02378	-0.02802	-0.04988
								21	0.115433	-0.00064	-0.03748	-0.04711			21	0.168619	0.025243	-0.02491	-0.04797				21	0.172849	0.024448	-0.0275	-0.0496
								21.2	0.116772	4.36e-05	-0.03762	-0.047			21.2	0.170256	0.025346	-0.02462	-0.04821				21.2	0.174328	0.024725	-0.02743	-0.04991
								21.4	0.11815	6.45e-05	-0.03744	-0.04709			21.4	0.171783	0.025491	-0.02457	-0.04855				21.4	0.176725	0.025045	-0.02698	-0.04971
								21.6	0.119467	0.000679	-0.03674	-0.04745			21.6	0.173361	0.025642	-0.02428	-0.04856				21.6	0.178193	0.025219	-0.0272	-0.0498
								21.8	0.120985	0.001434	-0.03643	-0.04801			21.8	0.175683	0.026142	-0.02406	-0.04893				21.8	0.179865	0.025776	-0.02677	-0.0496
								22	0.122656	0.001889	-0.0357	-0.04791			22	0.17721	0.027034	-0.0235	-0.049				22	0.181975	0.025876	-0.02622	-0.05004
								22.2	0.124466	0.001956	-0.03514	-0.04801			22.2	0.179087	0.027848	-0.02325	-0.04889				22.2	0.183688	0.02672	-0.02593	-0.05003
								22.4	0.126001	0.002589	-0.03477	-0.04794			22.4	0.180827	0.028507	-0.02316	-0.0486				22.4	0.185317	0.027081	-0.02608	-0.05037
								22.6	0.127585	0.002964	-0.03484	-0.04841			22.6	0.182848	0.029152	-0.02305	-0.04848				22.6	0.187323	0.027435	-0.02625	-0.05042
								22.8	0.128824	0.003327	-0.0345	-0.04878			22.8	0.184589	0.029898	-0.02309	-0.04841				22.8	0.189424	0.028308	-0.02586	-0.05063
								23	0.130151	0.003864	-0.03484	-0.04893			23	0.186545	0.031363	-0.02312	-0.04855				23	0.191573	0.029275	-0.02602	-0.05066
								23.2	0.131917	0.003856	-0.03523	-0.04928			23.2	0.188272	0.031557	-0.02301	-0.04867				23.2	0.193759	0.030225	-0.02591	-0.05062
								23.4	0.133167	0.004294	-0.03526	-0.04918			23.4	0.190057	0.032533	-0.02273	-0.04879				23.4	0.196127	0.030742	-0.02627	-0.05048
								23.6	0.134608	0.004668	-0.03553	-0.04921			23.6	0.19205	0.033058	-0.02233	-0.04884				23.6	0.19783	0.03146	-0.02576	-0.05043
								23.8	0.135885	0.005411	-0.03546	-0.04902			23.8	0.194091	0.033689	-0.02179	-0.04863				23.8	0.199964	0.032503	-0.02574	-0.05027
								24	0.137398	0.0057	-0.03535	-0.04872			24	0.196107	0.034348	-0.0218	-0.04864				24	0.201686	0.033297	-0.02542	-0.05024
								24.2	0.138826	0.006321	-0.03567	-0.04894			24.2	0.198259	0.035147	-0.02153	-0.04836				24.2	0.203549	0.034087	-0.02503	-0.04978
								24.4	0.140659	0.006645	-0.03552	-0.04898			24.4	0.200429	0.035581	-0.02146	-0.04852				24.4	0.205574	0.034894	-0.02467	-0.04938
								24.6	0.141817	0.006962	-0.03555	-0.0486			24.6	0.202373	0.036175	-0.02157	-0.04868				24.6	0.207135	0.035512	-0.02432	-0.04916
								24.8	0.143006	0.007509	-0.03566	-0.04863			24.8	0.204328	0.037016	-0.0217	-0.04899				24.8	0.208968	0.036211	-0.02357	-0.04917
								25	0.1445	0.007909	-0.03585	-0.04863			25	0.206286	0.037503	-0.02153	-0.04943				25	0.211096	0.036603	-0.02338	-0.04842
								25.2	0.145683	0.008207	-0.03639	-0.04863			25.2	0.208237	0.038109	-0.02126	-0.04914				25.2	0.21298	0.036806	-0.02282	-0.04837
								25.4	0.146984	0.008331	-0.03594	-0.04906			25.4	0.210008	0.038671	-0.02123	-0.04867				25.4	0.214914	0.037223	-0.02238	-0.04824
								25.6	0.147916	0.009157	-0.03564	-0.04963			25.6	0.212124	0.03894	-0.02053	-0.04863				25.6	0.216554	0.037593	-0.02256	-0.04861
								25.8	0.14919	0.009855	-0.03563	-0.04958			25.8	0.214173	0.039686	-0.02047	-0.04829				25.8	0.218653	0.038703	-0.02224	-0.04831
								26	0.15054	0.010127	-0.03531	-0.0496			26	0.215891	0.040608	-0.01995	-0.04847				26	0.220395	0.039151	-0.02179	-0.04859
								26.2	0.151916	0.010336	-0.03506	-0.04962			26.2	0.217745	0.041659	-0.02011	-0.04775				26.2	0.221753	0.040176	-0.02159	-0.0489
								26.4	0.15319	0.011015	-0.03501	-0.04973			26.4	0.219455	0.042276	-0.02001	-0.04753				26.4	0.223462	0.040128	-0.02165	-0.04944
								26.6	0.154652	0.011321	-0.0354	-0.04987			26.6	0.221148	0.043039	-0.01943	-0.04793				26.6	0.225173	0.04036	-0.0216	-0.04953
								26.8	0.155786	0.011952	-0.03532	-0.04946			26.8	0.223252	0.043879	-0.01891	-0.04802				26.8	0.227234	0.040953	-0.02162	-0.04949
								27	0.156905	0.012274	-0.03545	-0.04954			27	0.225396	0.044244	-0.01832	-0.04834				27	0.228793	0.041434	-0.02206	-0.04946
								27.2	0.158296	0.012783	-0.03484	-0.04951			27.2	0.226985	0.044593	-0.01794	-0.04855				27.2	0.230748	0.041706	-0.02238	-0.04931
								27.4	0.159237	0.013359	-0.03514	-0.04925			27.4	0.228762	0.045398	-0.0177	-0.04899				27.4	0.23302	0.042258	-0.023	-0.04918
								27.6	0.160489	0.013707	-0.03472	-0.04958			27.6	0.230948	0.045882	-0.01738	-0.04911				27.6	0.234737	0.042433	-0.02262	-0.04939
								27.8	0.161908	0.014022	-0.03472	-0.04977			27.8	0.233113	0.04687	-0.01739	-0.04945				27.8	0.237268	0.043315	-0.02224	-0.04901
								28	0.163884	0.014771	-0.03482	-0.04966			28	0.235008	0.047437	-0.01764	-0.05006				28	0.238954	0.043772	-0.02149	-0.04889
								28.2	0.165401	0.015495	-0.03465	-0.04976			28.2	0.236891	0.047971	-0.01762	-0.05039				28.2	0.240844	0.044463	-0.02106	-0.04874
								28.4	0.166854	0.016201	-0.03413	-0.04988			28.4	0.23865	0.048555	-0.01788	-0.05067				28.4	0.24266	0.044507	-0.02083	-0.0489
								28.6	0.167924	0.016341	-0.03406	-0.04998			28.6	0.240552	0.049288	-0.01821	-0.05104				28.6	0.244915	0.044673	-0.02078	-0.04859
								28.8	0.169511	0.01672	-0.03372	-0.05005			28.8	0.242302	0.049512	-0.0188	-0.05093				28.8	0.246701	0.045252	-0.02057	-0.04892
								29	0.170879	0.01724	-0.03324	-0.04993			29	0.243719	0.050179	-0.01875	-0.05105				29	0.248517	0.045438	-0.02012	-0.04847
								29.2	0.17206	0.017886	-0.03312	-0.04965			29.2	0.245275	0.050749	-0.01849	-0.05058				29.2	0.250281	0.045877	-0.01921	-0.04869
								29.4	0.173606	0.019122	-0.0325	-0.04953			29.4	0.246411	0.050826	-0.01847	-0.04995				29.4	0.252327	0.047011	-0.019	-0.04898
								29.6	0.175227	0.020029	-0.03247	-0.04932			29.6	0.248009	0.051247	-0.01835	-0.04987				29.6	0.254364	0.047835	-0.01831	-0.04924
								29.8	0.176637	0.020912	-0.03209	-0.04908			29.8	0.249818	0.051795	-0.01805	-0.04971				29.8	0.256024	0.048918	-0.01734	-0.04904
								30	0.178254	0.021358	-0.03158	-0.04957			30	0.251754	0.0527	-0.01749	-0.04954				30	0.257382	0.049464	-0.01676	-0.04944
								30.2	0.179834	0.0218	-0.0311	-0.04888			30.2	0.253983	0.053259	-0.01732	-0.04823				30.2	0.259412	0.050508	-0.01667	-0.05003
								30.4	0.181285	0.022043	-0.03114	-0.04886			30.4	0.255747	0.05376	-0.01681	-0.04799				30.4	0.261781	0.051506	-0.01647	-0.05009
								30.6	0.183193	0.022133	-0.03101	-0.04866			30.6	0.257549	0.054365	-0.01589	-0.0476				30.6	0.263324	0.052457	-0.01639	-0.04981
								30.8	0.18469	0.022318	-0.03071	-0.04855			30.8	0.260159	0.05522	-0.01516	-0.04759				30.8	0.265135	0.053427	-0.01625	-0.04971
								31	0.186019	0.022141	-0.03035	-0.04836			31	0.262101	0.055829	-0.01458	-0.04786				31	0.266766	0.054584	-0.01644	-0.04988
								31.2	0.187733	0.022547	-0.03007	-0.04819			31.2	0.264004	0.057	-0.01412	-0.04788				31.2	0.268526	0.055278	-0.01651	-0.04975
								31.4	0.189643	0.022448	-0.03038	-0.04807			31.4	0.266127	0.058036	-0.01428	-0.04804				31.4	0.270471	0.056073	-0.01609	-0.04961
								31.6	0.191542	0.022514	-0.03025	-0.04823			31.6	0.268357	0.058749	-0.0139	-0.04771				31.6	0.271976	0.056383	-0.01561	-0.04955
								31.8	0.193459	0.022647	-0.0306	-0.04794			31.8	0.270368	0.059602	-0.01364	-0.04788				31.8	0.274232	0.057134	-0.01523	-0.04933
								32	0.19538	0.023011	-0.03065	-0.04748			32	0.272254	0.06007	-0.01342	-0.04759				32	0.276057	0.05759	-0.01551	-0.049
								32.2	0.19674	0.023189	-0.03043	-0.04733			32.2	0.273796	0.060726	-0.01373	-0.04758				32.2	0.277913	0.057878	-0.01577	-0.04904
								32.4	0.198313	0.02372	-0.03017	-0.0475			32.4	0.275633	0.061661	-0.01367	-0.04752				32.4	0.280066	0.057842	-0.01622	-0.04852
								32.6	0.199432	0.023957	-0.0304	-0.04778			32.6	0.277196	0.061861	-0.01336	-0.04764				32.6	0.282134	0.058138	-0.01685	-0.04868
								32.8	0.200612	0.024446	-0.03019	-0.04776			32.8	0.278652	0.06201	-0.01323	-0.04792				32.8	0.283487	0.058602	-0.01721	-0.04913
								33	0.20157	0.025016	-0.0299	-0.04815			33	0.279663	0.0627	-0.01292	-0.04815				33	0.28562	0.058881	-0.01689	-0.04893
								33.2	0.203021	0.025604	-0.02965	-0.04799			33.2	0.281172	0.062606	-0.0129	-0.04784				33.2	0.287754	0.059793	-0.01706	-0.04931
								33.4	0.204088	0.026257	-0.02954	-0.04799			33.4	0.282139	0.06294	-0.01267	-0.04763				33.4	0.289784	0.060826	-0.01705	-0.04974
								33.6	0.205479	0.026625	-0.0293	-0.04815			33.6	0.283236	0.063775	-0.01256	-0.04784				33.6	0.291964	0.06152	-0.01643	-0.04973
								33.8	0.206621	0.027047	-0.02881	-0.04859			33.8	0.284776	0.064045	-0.01243	-0.04822				33.8	0.29401	0.061531	-0.01661	-0.04983
								34	0.207524	0.02738	-0.02853	-0.04913			34	0.286496	0.064661	-0.01225	-0.04835				34	0.295744	0.062478	-0.01655	-0.05047
								34.2	0.208417	0.027903	-0.02869	-0.04881			34.2	0.288129	0.064894	-0.01176	-0.04848				34.2	0.297877	0.063592	-0.01643	-0.05081
								34.4	0.209421	0.027924	-0.02889	-0.04929			34.4	0.289478	0.065553	-0.01153	-0.04865				34.4	0.299581	0.064711	-0.01642	-0.05057
								34.6	0.210505	0.028127	-0.02881	-0.04961			34.6	0.291437	0.066038	-0.01112	-0.04906				34.6	0.301412	0.06522	-0.01616	-0.05072
								34.8	0.211321	0.028913	-0.0287	-0.04959			34.8	0.293535	0.066994	-0.01078	-0.0499				34.8	0.303205	0.0659	-0.0156	-0.05062
								35	0.212565	0.029392	-0.02835	-0.04952			35	0.29545	0.067762	-0.01076	-0.04974				35	0.304651	0.067407	-0.01543	-0.05027
								35.2	0.21379	0.030273	-0.02825	-0.04984			35.2	0.297017	0.068324	-0.01062	-0.04936				35.2	0.306076	0.067793	-0.01496	-0.05031
								35.4	0.214795	0.030912	-0.02804	-0.04982			35.4	0.299004	0.069191	-0.01044	-0.0496				35.4	0.307807	0.068926	-0.01412	-0.05035
								35.6	0.215786	0.031265	-0.02793	-0.04961			35.6	0.301444	0.069882	-0.0099	-0.04901				35.6	0.309828	0.069533	-0.01385	-0.05009
								35.8	0.216681	0.032051	-0.02759	-0.04953			35.8	0.303725	0.07056	-0.00951	-0.04858				35.8	0.312033	0.070147	-0.01377	-0.04996
								36	0.217744	0.032577	-0.0274	-0.04927			36	0.305702	0.071139	-0.00943	-0.0484				36	0.313909	0.070686	-0.01365	-0.04928
								36.2	0.218987	0.033268	-0.02761	-0.04909			36.2	0.30784	0.071812	-0.00928	-0.04833				36.2	0.315603	0.070982	-0.01344	-0.04956
								36.4	0.220441	0.03362	-0.02743	-0.04876			36.4	0.310266	0.072176	-0.00893	-0.04844				36.4	0.317725	0.071043	-0.0132	-0.049
								36.6	0.221307	0.033966	-0.02771	-0.04851			36.6	0.312281	0.072568	-0.00872	-0.04829				36.6	0.31941	0.07119	-0.0132	-0.04905
								36.8	0.222258	0.034267	-0.02778	-0.04826			36.8	0.31389	0.072908	-0.00903	-0.04835				36.8	0.320753	0.071426	-0.01291	-0.04894
								37	0.223783	0.034699	-0.02773	-0.0482			37	0.315847	0.073593	-0.00893	-0.0479				37	0.3224	0.071533	-0.01201	-0.04871
								37.2	0.225591	0.035207	-0.02757	-0.04799			37.2	0.317401	0.074028	-0.00885	-0.04768				37.2	0.324016	0.07204	-0.01178	-0.04899
								37.4	0.22685	0.035582	-0.02768	-0.04748			37.4	0.318372	0.075295	-0.00905	-0.04743				37.4	0.325643	0.071927	-0.01135	-0.04896
								37.6	0.228883	0.03603	-0.02779	-0.04721			37.6	0.319622	0.076575	-0.00954	-0.04729				37.6	0.327423	0.072231	-0.01128	-0.04888
								37.8	0.23044	0.036308	-0.02775	-0.04734			37.8	0.320965	0.077251	-0.00961	-0.04777				37.8	0.328709	0.072619	-0.01131	-0.04881
								38	0.231591	0.036494	-0.02789	-0.04742			38	0.322391	0.077844	-0.00977	-0.04804				38	0.329931	0.073814	-0.01114	-0.04884
								38.2	0.233118	0.037068	-0.02818	-0.04755			38.2	0.323462	0.078303	-0.01007	-0.04802				38.2	0.331742	0.074492	-0.01138	-0.04894
								38.4	0.234527	0.037488	-0.02797	-0.0475			38.4	0.325023	0.078675	-0.01045	-0.04779				38.4	0.333409	0.075148	-0.01127	-0.04902
								38.6	0.23598	0.038275	-0.02804	-0.04808			38.6	0.326388	0.079174	-0.01058	-0.04809				38.6	0.335637	0.076136	-0.01079	-0.04955
								38.8	0.237422	0.038773	-0.02799	-0.04803			38.8	0.327372	0.07979	-0.01047	-0.04813				38.8	0.337005	0.077186	-0.01009	-0.04922
								39	0.238506	0.039107	-0.02791	-0.04816			39	0.328887	0.080182	-0.01014	-0.04771				39	0.338523	0.078329	-0.00964	-0.04918
								39.2	0.238943	0.039839	-0.02745	-0.04866			39.2	0.329887	0.080564	-0.00956	-0.04764				39.2	0.3402	0.078831	-0.0093	-0.04965
								39.4	0.240026	0.039965	-0.02687	-0.04855			39.4	0.331833	0.081246	-0.00903	-0.04801				39.4	0.342461	0.079781	-0.00876	-0.0496
								39.6	0.241216	0.040429	-0.02658	-0.04894			39.6	0.333895	0.081365	-0.00827	-0.04759				39.6	0.344486	0.080031	-0.00861	-0.0496
								39.8	0.242626	0.041172	-0.02638	-0.04933			39.8	0.335803	0.081784	-0.00761	-0.04776				39.8	0.346669	0.080613	-0.00867	-0.04976
								40	0.244375	0.041345	-0.02675	-0.04943			40	0.337523	0.082558	-0.00678	-0.04808				40	0.349031	0.081276	-0.00802	-0.04937
								40.2	0.245804	0.041713	-0.02671	-0.04949			40.2	0.339695	0.083018	-0.0063	-0.048				40.2	0.351016	0.08127	-0.00803	-0.04947
								40.4	0.247078	0.041955	-0.02634	-0.04942			40.4	0.341645	0.08332	-0.00579	-0.04815				40.4	0.352961	0.081868	-0.0074	-0.04921
								40.6	0.248186	0.042869	-0.0265	-0.04955			40.6	0.343328	0.083978	-0.00528	-0.04796				40.6	0.354841	0.082011	-0.00751	-0.04923
								40.8	0.249468	0.0433	-0.02632	-0.04974			40.8	0.345025	0.084379	-0.0051	-0.04773				40.8	0.356588	0.081967	-0.00758	-0.04894
								41	0.251683	0.043861	-0.0264	-0.04971			41	0.347601	0.085416	-0.00465	-0.04781				41	0.358346	0.082435	-0.00769	-0.04896
								41.2	0.253123	0.044253	-0.0261	-0.04968			41.2	0.349479	0.086483	-0.00466	-0.04736				41.2	0.359978	0.083019	-0.00777	-0.04929
								41.4	0.254589	0.044507	-0.02625	-0.04906			41.4	0.351436	0.087447	-0.00494	-0.04719				41.4	0.361714	0.083259	-0.00812	-0.04917
								41.6	0.256063	0.04438	-0.02604	-0.04931			41.6	0.35359	0.088534	-0.0045	-0.0472				41.6	0.363512	0.08403	-0.0085	-0.04894
								41.8	0.257351	0.044407	-0.02601	-0.04882			41.8	0.355181	0.089434	-0.00463	-0.04773				41.8	0.364989	0.084956	-0.00907	-0.04902
								42	0.258537	0.044589	-0.02643	-0.04817			42	0.356993	0.089912	-0.00479	-0.04753				42	0.366434	0.085783	-0.0092	-0.04927
								42.2	0.25968	0.044751	-0.02666	-0.04818			42.2	0.358742	0.090737	-0.00497	-0.04727				42.2	0.367921	0.086319	-0.00928	-0.04951
								42.4	0.260486	0.045364	-0.02676	-0.04754			42.4	0.360304	0.091478	-0.00477	-0.04756				42.4	0.36982	0.087054	-0.00914	-0.04956
								42.6	0.261632	0.045435	-0.02711	-0.04779			42.6	0.361768	0.092071	-0.00464	-0.04767				42.6	0.371877	0.088052	-0.00858	-0.04963
								42.8	0.262619	0.045701	-0.02682	-0.04747			42.8	0.363114	0.092672	-0.00477	-0.04747				42.8	0.373276	0.088414	-0.00821	-0.04915
								43	0.263513	0.04594	-0.02669	-0.0478			43	0.365037	0.093505	-0.00461	-0.04752				43	0.374867	0.089285	-0.00778	-0.04917
								43.2	0.264656	0.046372	-0.02638	-0.04825			43.2	0.366543	0.094315	-0.00445	-0.04746				43.2	0.376483	0.089754	-0.00724	-0.04951
								43.4	0.266563	0.046886	-0.02657	-0.04849			43.4	0.368229	0.094946	-0.00411	-0.04761				43.4	0.378512	0.09025	-0.00697	-0.04952
								43.6	0.267863	0.048017	-0.02676	-0.04912			43.6	0.369972	0.095689	-0.00362	-0.0475				43.6	0.380571	0.091122	-0.00661	-0.04941
								43.8	0.269232	0.048797	-0.02679	-0.04929			43.8	0.371615	0.096627	-0.00322	-0.048				43.8	0.382858	0.091707	-0.00655	-0.04954
								44	0.270546	0.049475	-0.02698	-0.04952			44	0.373014	0.097296	-0.00297	-0.04792				44	0.384635	0.091923	-0.00652	-0.04933
								44.2	0.271586	0.050411	-0.02658	-0.0499			44.2	0.37433	0.097696	-0.00317	-0.04784				44.2	0.386398	0.092606	-0.00627	-0.049
								44.4	0.272888	0.051331	-0.0263	-0.05009			44.4	0.37584	0.098316	-0.00283	-0.04745				44.4	0.388526	0.093371	-0.00582	-0.0495
								44.6	0.274	0.05247	-0.02616	-0.05061			44.6	0.377403	0.098742	-0.00315	-0.04706				44.6	0.390472	0.093662	-0.00597	-0.04923
								44.8	0.275381	0.053181	-0.02563	-0.05098			44.8	0.37931	0.099192	-0.00295	-0.04676				44.8	0.392446	0.094598	-0.00624	-0.049
								45	0.276931	0.054071	-0.02532	-0.05059			45	0.381108	0.099944	-0.00275	-0.0464				45	0.394105	0.095901	-0.00596	-0.04937
								45.2	0.278017	0.054528	-0.02475	-0.05059			45.2	0.382378	0.100547	-0.00272	-0.04534				45.2	0.395945	0.096485	-0.00572	-0.04961
								45.4	0.279325	0.055156	-0.0249	-0.05028			45.4	0.38381	0.101017	-0.0029	-0.04539				45.4	0.3977	0.097266	-0.0058	-0.04951
								45.6	0.279977	0.055525	-0.02474	-0.04999			45.6	0.385377	0.102109	-0.00227	-0.04522				45.6	0.39943	0.097612	-0.00576	-0.04994
								45.8	0.280729	0.056108	-0.02487	-0.04925			45.8	0.387175	0.102861	-0.0025	-0.04499				45.8	0.401181	0.098605	-0.00564	-0.04996
								46	0.281416	0.056229	-0.02515	-0.04902			46	0.388867	0.103069	-0.00183	-0.04424				46	0.402473	0.099438	-0.00515	-0.04975
								46.2	0.282343	0.056507	-0.02473	-0.04902			46.2	0.390561	0.1038	-0.0018	-0.0444				46.2	0.404229	0.099492	-0.00498	-0.04934
								46.4	0.283685	0.057185	-0.02455	-0.04875			46.4	0.392252	0.104316	-0.00122	-0.04424				46.4	0.406237	0.100272	-0.0049	-0.04936
								46.6	0.285074	0.057252	-0.02428	-0.04894			46.6	0.394268	0.104798	-0.00129	-0.04404				46.6	0.407732	0.100708	-0.00461	-0.04933
								46.8	0.286284	0.057632	-0.02361	-0.04868			46.8	0.395844	0.105472	-0.0013	-0.04399				46.8	0.409168	0.101399	-0.00446	-0.04926
								47	0.287829	0.057797	-0.02377	-0.04868			47	0.397922	0.105994	-0.00104	-0.04394				47	0.410628	0.101952	-0.00388	-0.049
								47.2	0.289124	0.058277	-0.02363	-0.04844			47.2	0.399622	0.106285	-0.00045	-0.044				47.2	0.412022	0.101687	-0.00398	-0.04876
								47.4	0.2904	0.058715	-0.02344	-0.04869			47.4	0.401259	0.106818	8.68e-06	-0.04411				47.4	0.413554	0.102606	-0.00395	-0.04848
								47.6	0.291661	0.058934	-0.02324	-0.04851			47.6	0.403026	0.107595	0.000256	-0.04474				47.6	0.41512	0.103214	-0.00374	-0.04814
								47.8	0.293256	0.05923	-0.02236	-0.04859			47.8	0.404498	0.108169	0.00078	-0.0452				47.8	0.416271	0.103223	-0.00384	-0.04808
								48	0.294718	0.059629	-0.02204	-0.04855			48	0.406323	0.108671	0.000963	-0.04536				48	0.418042	0.103902	-0.0035	-0.04735
								48.2	0.295955	0.060425	-0.02142	-0.04877			48.2	0.408265	0.108894	0.000897	-0.04557				48.2	0.419818	0.105138	-0.00296	-0.04755
								48.4	0.297072	0.06033	-0.02099	-0.04888			48.4	0.410111	0.109356	0.001029	-0.04538				48.4	0.421712	0.105695	-0.00264	-0.04822
								48.6	0.298605	0.060728	-0.02043	-0.04874			48.6	0.41164	0.109383	0.001444	-0.04561				48.6	0.423553	0.106521	-0.00246	-0.04798
								48.8	0.30017	0.060973	-0.02023	-0.04862			48.8	0.413114	0.109747	0.001921	-0.04576				48.8	0.425365	0.107338	-0.00249	-0.0482
								49	0.30155	0.061253	-0.02035	-0.04818			49	0.414665	0.110564	0.001928	-0.0454				49	0.426718	0.108206	-0.00197	-0.04867
								49.2	0.302859	0.061544	-0.02071	-0.0485			49.2	0.416301	0.111241	0.001942	-0.04545				49.2	0.428548	0.108294	-0.00191	-0.04897
								49.4	0.304262	0.062256	-0.02068	-0.04863			49.4	0.418185	0.112093	0.002257	-0.04566				49.4	0.430081	0.109033	-0.00179	-0.0493
								49.6	0.305582	0.062388	-0.02091	-0.0483			49.6	0.419846	0.113128	0.002489	-0.04562				49.6	0.432282	0.109117	-0.00181	-0.04936
								49.8	0.306901	0.062787	-0.02133	-0.04851			49.8	0.421865	0.114086	0.002723	-0.04562				49.8	0.434181	0.109968	-0.00134	-0.04911
								50	0.308105	0.062787	-0.02184	-0.04857			50	0.422997	0.114631	0.003109	-0.04523				50	0.435492	0.110387	-0.00129	-0.04929
								50.2	0.309331	0.063741	-0.02177	-0.04831			50.2	0.424506	0.115469	0.003366	-0.04545				50.2	0.437376	0.110479	-0.00112	-0.0495
								50.4	0.310518	0.064251	-0.02205	-0.04855			50.4	0.426091	0.116257	0.00369	-0.04544				50.4	0.438828	0.111542	-0.00108	-0.04981
								50.6	0.311579	0.064942	-0.02212	-0.04825			50.6	0.427836	0.116991	0.003467	-0.04589				50.6	0.440317	0.1122	-0.00091	-0.04977
								50.8	0.312434	0.065646	-0.02223	-0.04836			50.8	0.42942	0.117877	0.003757	-0.04571				50.8	0.442147	0.11306	-0.00093	-0.04968
								51	0.31362	0.066436	-0.0222	-0.04837			51	0.431301	0.118308	0.004291	-0.04525				51	0.44359	0.113467	-0.00085	-0.04917
								51.2	0.314954	0.066903	-0.02222	-0.04873			51.2	0.432827	0.118681	0.004838	-0.04562				51.2	0.44509	0.114312	-0.00082	-0.04921
								51.4	0.316617	0.067137	-0.02204	-0.04928			51.4	0.434543	0.119085	0.005096	-0.04591				51.4	0.44679	0.115742	-0.0003	-0.04874
								51.6	0.318223	0.067611	-0.02184	-0.04909			51.6	0.436194	0.119692	0.005403	-0.04627				51.6	0.448331	0.116286	6.25e-05	-0.0485
								51.8	0.319508	0.06826	-0.02104	-0.04879			51.8	0.437966	0.120453	0.005984	-0.04624				51.8	0.450009	0.117003	0.000119	-0.04863
								52	0.320374	0.068448	-0.0211	-0.04857			52	0.440548	0.120751	0.006012	-0.04642				52	0.451835	0.117767	0.001104	-0.04806
								52.2	0.321439	0.068625	-0.02083	-0.04907			52.2	0.442135	0.120768	0.006191	-0.0461				52.2	0.453335	0.118698	0.001115	-0.04855
								52.4	0.322684	0.068365	-0.02068	-0.04927			52.4	0.443752	0.120839	0.006827	-0.04577				52.4	0.454858	0.119271	0.001663	-0.04846
								52.6	0.323835	0.068638	-0.02038	-0.04926			52.6	0.445475	0.121185	0.007312	-0.04555				52.6	0.456689	0.119305	0.001929	-0.04828
								52.8	0.324785	0.068523	-0.02026	-0.04947			52.8	0.447176	0.121794	0.007553	-0.045				52.8	0.458089	0.119575	0.002268	-0.04848
								53	0.326062	0.068938	-0.02009	-0.04956			53	0.449022	0.122379	0.008338	-0.04482				53	0.459653	0.119896	0.002833	-0.04861
								53.2	0.327024	0.069163	-0.01992	-0.04981			53.2	0.450377	0.122795	0.008528	-0.04492				53.2	0.461241	0.119585	0.003337	-0.04812
								53.4	0.328184	0.069695	-0.01949	-0.04971			53.4	0.45184	0.123707	0.008634	-0.04481				53.4	0.463103	0.119996	0.003439	-0.04825
								53.6	0.329348	0.069904	-0.01985	-0.04958			53.6	0.452711	0.124789	0.00866	-0.0447				53.6	0.465223	0.119415	0.003641	-0.04798
								53.8	0.330251	0.070722	-0.02004	-0.04972			53.8	0.453963	0.125669	0.008718	-0.04455				53.8	0.467146	0.119736	0.003501	-0.04826
								54	0.331017	0.070926	-0.02002	-0.0492			54	0.454829	0.126158	0.008685	-0.04415				54	0.46892	0.120199	0.003792	-0.04835
								54.2	0.331847	0.07198	-0.02002	-0.04919			54.2	0.455987	0.127149	0.00905	-0.0442				54.2	0.470705	0.120055	0.004043	-0.04842
								54.4	0.333153	0.072727	-0.02053	-0.04949			54.4	0.456984	0.128273	0.009179	-0.04438				54.4	0.472387	0.120682	0.003955	-0.048
								54.6	0.33476	0.073673	-0.02042	-0.04949			54.6	0.458745	0.129074	0.009161	-0.04442				54.6	0.474683	0.12106	0.004217	-0.04793
								54.8	0.335548	0.073761	-0.02004	-0.04965			54.8	0.459957	0.13	0.009344	-0.04396				54.8	0.476482	0.12201	0.004018	-0.04768
								55	0.336925	0.074348	-0.0201	-0.04925			55	0.461134	0.130313	0.010059	-0.04412				55	0.477697	0.122938	0.003837	-0.04777
								55.2	0.338605	0.074848	-0.02023	-0.0489			55.2	0.462464	0.131207	0.010024	-0.04416				55.2	0.479263	0.123664	0.003725	-0.04805
								55.4	0.340617	0.074876	-0.01997	-0.04871			55.4	0.463878	0.131812	0.01008	-0.04438				55.4	0.48101	0.124527	0.003769	-0.048
								55.6	0.341907	0.07555	-0.0196	-0.04792			55.6	0.465724	0.132672	0.01016	-0.04422				55.6	0.481969	0.125569	0.00389	-0.04847
								55.8	0.343128	0.075917	-0.01909	-0.04773			55.8	0.467315	0.133096	0.010596	-0.04415				55.8	0.483322	0.126297	0.004622	-0.04874
								56	0.344328	0.076204	-0.01883	-0.04763			56	0.468945	0.133543	0.010903	-0.04396				56	0.484843	0.12709	0.005144	-0.04857
								56.2	0.345594	0.077107	-0.01835	-0.0477			56.2	0.470069	0.133856	0.011367	-0.04382				56.2	0.48639	0.127994	0.005024	-0.04875
								56.4	0.346647	0.077422	-0.01829	-0.04768			56.4	0.471669	0.133953	0.011624	-0.0434				56.4	0.487855	0.128369	0.00518	-0.04826
								56.6	0.347913	0.077788	-0.01797	-0.04791			56.6	0.473124	0.134425	0.011794	-0.04349				56.6	0.489539	0.128792	0.005331	-0.04778
								56.8	0.348868	0.078435	-0.01758	-0.04817			56.8	0.47466	0.134525	0.01201	-0.04334				56.8	0.490892	0.12971	0.005703	-0.04769
								57	0.349571	0.079255	-0.01781	-0.04845			57	0.476073	0.134813	0.012368	-0.04351				57	0.49248	0.130331	0.006059	-0.04742
								57.2	0.350413	0.07995	-0.01769	-0.04898			57.2	0.477405	0.135253	0.012243	-0.04322				57.2	0.493776	0.131089	0.006426	-0.04712
								57.4	0.35165	0.08084	-0.01758	-0.04918			57.4	0.478937	0.135841	0.012802	-0.04297				57.4	0.495468	0.131795	0.006404	-0.04754
								57.6	0.353041	0.081347	-0.01738	-0.04958			57.6	0.480037	0.136307	0.01314	-0.04289				57.6	0.497164	0.132377	0.00639	-0.04717
								57.8	0.354084	0.082293	-0.01713	-0.04981			57.8	0.481591	0.1368	0.013416	-0.0432				57.8	0.498517	0.133257	0.006386	-0.04661
								58	0.354986	0.082631	-0.01724	-0.05014			58	0.483126	0.137537	0.013858	-0.04313				58	0.499803	0.133685	0.007004	-0.0464
								58.2	0.356241	0.083021	-0.017	-0.05108			58.2	0.484381	0.138267	0.014116	-0.04314				58.2	0.501336	0.134087	0.007166	-0.046
								58.4	0.357482	0.083186	-0.01746	-0.05143			58.4	0.48626	0.139283	0.014299	-0.04325				58.4	0.503149	0.134851	0.007348	-0.04516
								58.6	0.358701	0.083421	-0.01714	-0.05149			58.6	0.48861	0.140469	0.014007	-0.04324				58.6	0.505041	0.135872	0.007404	-0.04475
								58.8	0.359137	0.082955	-0.01716	-0.05128			58.8	0.489987	0.14133	0.014314	-0.04323				58.8	0.506171	0.13664	0.00708	-0.04435
								59	0.360243	0.083643	-0.01752	-0.05092			59	0.49191	0.142196	0.014726	-0.04329				59	0.506992	0.137275	0.007289	-0.04472
								59.2	0.361296	0.083808	-0.01719	-0.05066			59.2	0.493621	0.143752	0.014281	-0.04291				59.2	0.508528	0.138047	0.007658	-0.04503
								59.4	0.362401	0.084097	-0.01747	-0.05047			59.4	0.495413	0.144143	0.014117	-0.04337				59.4	0.509821	0.138971	0.008538	-0.0454
								59.6	0.362779	0.084594	-0.01698	-0.04992			59.6	0.497275	0.144921	0.013742	-0.04328				59.6	0.511283	0.139735	0.009188	-0.04591
								59.8	0.363716	0.08496	-0.01714	-0.05004			59.8	0.498678	0.145893	0.013798	-0.04328				59.8	0.513378	0.139916	0.010189	-0.04621
								60	0.364906	0.085625	-0.01701	-0.04973			60	0.500483	0.14656	0.013983	-0.04332				60	0.515028	0.140419	0.009807	-0.04633
								60.2	0.365893	0.086099	-0.01715	-0.04961			60.2	0.502462	0.146776	0.01363	-0.04336				60.2	0.516639	0.140878	0.010093	-0.04619
								60.4	0.366682	0.085877	-0.01735	-0.04955			60.4	0.504225	0.14711	0.013536	-0.04303				60.4	0.518178	0.141378	0.009899	-0.04607
								60.6	0.368036	0.086567	-0.01753	-0.04973			60.6	0.505879	0.147505	0.013426	-0.04294				60.6	0.519892	0.141946	0.00975	-0.04626
								60.8	0.368647	0.086926	-0.01758	-0.04987			60.8	0.507244	0.147618	0.01327	-0.04254				60.8	0.52159	0.142562	0.010083	-0.04635
								61	0.369902	0.087249	-0.01773	-0.04965			61	0.508819	0.147908	0.013405	-0.04239				61	0.523457	0.142931	0.010267	-0.04665
								61.2	0.371451	0.087705	-0.01743	-0.04992			61.2	0.510262	0.147925	0.013847	-0.04211				61.2	0.524976	0.144068	0.010317	-0.04718
								61.4	0.37284	0.088058	-0.0172	-0.04986			61.4	0.511654	0.148158	0.014184	-0.04258				61.4	0.526704	0.144463	0.010571	-0.04754
								61.6	0.374426	0.088272	-0.01642	-0.04968			61.6	0.512987	0.148524	0.014128	-0.04271				61.6	0.528242	0.145551	0.010603	-0.04706
								61.8	0.375922	0.088643	-0.01592	-0.04942			61.8	0.51427	0.148983	0.014576	-0.04278				61.8	0.52966	0.145906	0.010955	-0.04686
								62	0.377359	0.088939	-0.01604	-0.04958			62	0.515593	0.149419	0.014851	-0.04218				62	0.531411	0.146792	0.011012	-0.04691
								62.2	0.378711	0.089222	-0.01553	-0.04972			62.2	0.516886	0.150026	0.014916	-0.04185				62.2	0.533285	0.147224	0.011365	-0.04648
								62.4	0.380127	0.089798	-0.0155	-0.04949			62.4	0.518759	0.150617	0.015041	-0.04166				62.4	0.535044	0.147253	0.011246	-0.04658
								62.6	0.381057	0.090081	-0.0157	-0.04942			62.6	0.520325	0.151529	0.015458	-0.04197				62.6	0.536491	0.148286	0.011356	-0.04633
								62.8	0.382134	0.090497	-0.01575	-0.04916			62.8	0.521518	0.151669	0.01611	-0.04198				62.8	0.537635	0.148599	0.011375	-0.04678
								63	0.383534	0.091053	-0.01572	-0.04887			63	0.523038	0.152126	0.016249	-0.04178				63	0.538953	0.149294	0.012103	-0.04731
								63.2	0.384387	0.091418	-0.01614	-0.04879			63.2	0.523678	0.152911	0.016648	-0.04196				63.2	0.540483	0.149956	0.012614	-0.0471
								63.4	0.385471	0.091719	-0.01592	-0.04872			63.4	0.525234	0.153404	0.01657	-0.04215				63.4	0.542083	0.150988	0.012902	-0.04725
								63.6	0.387024	0.091961	-0.01522	-0.04922			63.6	0.526504	0.154643	0.016645	-0.04231				63.6	0.543847	0.151675	0.013212	-0.04717
								63.8	0.388757	0.092151	-0.01514	-0.0495			63.8	0.528207	0.155513	0.016991	-0.04184				63.8	0.544992	0.152036	0.013544	-0.04715
								64	0.390082	0.092774	-0.01498	-0.04919			64	0.529798	0.155927	0.017738	-0.04195				64	0.545795	0.152761	0.013288	-0.04695
								64.2	0.391082	0.092862	-0.01471	-0.04907			64.2	0.531158	0.156669	0.017511	-0.04218				64.2	0.547252	0.153118	0.013788	-0.04661
								64.4	0.392255	0.093018	-0.01463	-0.04906			64.4	0.532364	0.156893	0.017816	-0.04208				64.4	0.548778	0.153798	0.013613	-0.04651
								64.6	0.393405	0.093388	-0.01457	-0.04896			64.6	0.533402	0.157507	0.018006	-0.04164				64.6	0.550123	0.154268	0.013927	-0.04625
								64.8	0.39426	0.093334	-0.01425	-0.04902			64.8	0.534594	0.157826	0.018149	-0.0418				64.8	0.551491	0.154789	0.014283	-0.04608
								65	0.395332	0.09363	-0.01435	-0.04852			65	0.536117	0.158216	0.018574	-0.04183				65	0.552924	0.155333	0.014215	-0.04606
								65.2	0.396728	0.094194	-0.01427	-0.04845			65.2	0.537339	0.158902	0.019002	-0.04196				65.2	0.55427	0.156046	0.014158	-0.04619
								65.4	0.398173	0.095161	-0.0144	-0.04776			65.4	0.5389	0.15944	0.019338	-0.04212				65.4	0.555873	0.156418	0.014936	-0.04587
								65.6	0.399648	0.095782	-0.01417	-0.04714			65.6	0.540571	0.159725	0.019995	-0.0417				65.6	0.557317	0.157773	0.015076	-0.04539
								65.8	0.400703	0.096756	-0.01399	-0.0466			65.8	0.542003	0.160042	0.02041	-0.04123				65.8	0.558917	0.157623	0.015057	-0.04531
								66	0.401517	0.097701	-0.014	-0.04717			66	0.543878	0.160622	0.02081	-0.04066				66	0.560506	0.158252	0.014704	-0.04544
								66.2	0.402198	0.098254	-0.01376	-0.0468			66.2	0.545424	0.161364	0.020948	-0.04062				66.2	0.562154	0.158366	0.014769	-0.04562
								66.4	0.40321	0.09883	-0.01351	-0.04681			66.4	0.547387	0.161747	0.021198	-0.04044				66.4	0.563516	0.159305	0.014478	-0.04616
								66.6	0.40416	0.099347	-0.01401	-0.04692			66.6	0.548883	0.162785	0.021942	-0.04038				66.6	0.565422	0.16011	0.014615	-0.04569
								66.8	0.405428	0.100107	-0.01362	-0.04703			66.8	0.550509	0.16304	0.022694	-0.04018				66.8	0.567187	0.16047	0.014742	-0.04619
								67	0.406561	0.100329	-0.01338	-0.04714			67	0.552241	0.16398	0.022763	-0.04008				67	0.568912	0.161333	0.015433	-0.04608
								67.2	0.407501	0.100919	-0.01369	-0.04728			67.2	0.553481	0.165041	0.023233	-0.04032				67.2	0.570139	0.162405	0.01522	-0.04546
								67.4	0.408769	0.101412	-0.01314	-0.04763			67.4	0.555918	0.166082	0.022973	-0.04022				67.4	0.571823	0.163444	0.015202	-0.04575
								67.6	0.410171	0.102015	-0.01298	-0.04793			67.6	0.557588	0.167286	0.023571	-0.04044				67.6	0.572981	0.163834	0.015894	-0.04562
								67.8	0.411367	0.102584	-0.0126	-0.04798			67.8	0.559396	0.167851	0.023666	-0.04038				67.8	0.574153	0.164445	0.015949	-0.04566
								68	0.41218	0.102925	-0.01255	-0.0481			68	0.560307	0.168373	0.024194	-0.04087				68	0.575854	0.165262	0.016036	-0.04574
								68.2	0.412865	0.103137	-0.01222	-0.04875			68.2	0.561682	0.168693	0.02408	-0.04098				68.2	0.577331	0.165724	0.01636	-0.0459
								68.4	0.413461	0.103272	-0.01188	-0.04884			68.4	0.562594	0.169069	0.02431	-0.04056				68.4	0.578881	0.166445	0.016245	-0.04632
								68.6	0.413927	0.103503	-0.01208	-0.04913			68.6	0.563912	0.170198	0.024863	-0.03981				68.6	0.580292	0.166526	0.016646	-0.04615
								68.8	0.41458	0.103725	-0.0119	-0.04928			68.8	0.565377	0.170586	0.025143	-0.04016				68.8	0.581787	0.166824	0.01681	-0.04653
								69	0.415381	0.104369	-0.01221	-0.04906			69	0.567044	0.171286	0.025729	-0.03983				69	0.583324	0.167186	0.017384	-0.04663
								69.2	0.41694	0.104897	-0.01238	-0.04945			69.2	0.568338	0.171809	0.025919	-0.03999				69.2	0.58494	0.167712	0.018078	-0.04709
								69.4	0.417735	0.10574	-0.01257	-0.04923			69.4	0.569889	0.171892	0.026078	-0.03969				69.4	0.586946	0.168405	0.018743	-0.04677
								69.6	0.41898	0.105978	-0.0122	-0.04931			69.6	0.571183	0.172092	0.026491	-0.03923				69.6	0.588729	0.168849	0.018982	-0.04671
								69.8	0.419607	0.106565	-0.01184	-0.04928			69.8	0.57244	0.172958	0.026116	-0.039				69.8	0.590649	0.168663	0.018977	-0.04691
								70	0.419937	0.106905	-0.01138	-0.04975			70	0.573803	0.173747	0.026027	-0.03918				70	0.592758	0.169313	0.019644	-0.04697
								70.2	0.421047	0.106947	-0.01118	-0.04914			70.2	0.575072	0.174491	0.026194	-0.03942				70.2	0.59431	0.169786	0.020343	-0.04674
								70.4	0.422204	0.107667	-0.01058	-0.04939			70.4	0.576713	0.175333	0.026308	-0.03912				70.4	0.59632	0.170541	0.020533	-0.04668
								70.6	0.423577	0.108345	-0.01064	-0.04959			70.6	0.578186	0.176216	0.027081	-0.0394				70.6	0.598458	0.171084	0.021278	-0.04608
								70.8	0.424484	0.108397	-0.0104	-0.04955			70.8	0.579717	0.17728	0.027023	-0.03959				70.8	0.599676	0.171979	0.02214	-0.04614
								71	0.425856	0.108827	-0.00981	-0.04912			71	0.58136	0.178275	0.026782	-0.03947				71	0.600837	0.172877	0.02248	-0.04574
								71.2	0.427298	0.10943	-0.00993	-0.04854			71.2	0.58284	0.178899	0.026986	-0.03989				71.2	0.602359	0.173464	0.022885	-0.04558
								71.4	0.428664	0.109798	-0.00928	-0.04838			71.4	0.58467	0.17963	0.027029	-0.04012				71.4	0.604051	0.173694	0.02319	-0.04556
								71.6	0.430103	0.109944	-0.00935	-0.04788			71.6	0.585539	0.180556	0.027566	-0.04055				71.6	0.605068	0.174094	0.023423	-0.04508
								71.8	0.431661	0.110533	-0.00896	-0.04768			71.8	0.58675	0.1808	0.027378	-0.04059				71.8	0.606552	0.174618	0.023119	-0.0449
								72	0.432475	0.110897	-0.00933	-0.04791			72	0.587972	0.181853	0.027331	-0.04047				72	0.60805	0.174753	0.022757	-0.04474
								72.2	0.433713	0.11135	-0.00926	-0.04816			72.2	0.589637	0.182606	0.027539	-0.04026				72.2	0.609315	0.175633	0.02227	-0.04467
								72.4	0.434598	0.111931	-0.00909	-0.04825			72.4	0.591209	0.183357	0.027627	-0.04002				72.4	0.610773	0.176222	0.022135	-0.04473
								72.6	0.43576	0.112145	-0.0097	-0.04843			72.6	0.592971	0.184126	0.027837	-0.03936				72.6	0.612508	0.176364	0.0225	-0.04455
								72.8	0.436822	0.112668	-0.00952	-0.04835			72.8	0.59444	0.184486	0.028212	-0.0394				72.8	0.613641	0.177279	0.022458	-0.04465
								73	0.438021	0.11362	-0.00966	-0.04879			73	0.596014	0.18482	0.028551	-0.03882				73	0.61493	0.177849	0.02247	-0.04444
								73.2	0.4392	0.113788	-0.0103	-0.0493			73.2	0.597574	0.184636	0.028452	-0.03914				73.2	0.616285	0.178577	0.022515	-0.04425
								73.4	0.439875	0.114409	-0.0103	-0.04935			73.4	0.599273	0.184991	0.028792	-0.03895				73.4	0.618299	0.179101	0.022619	-0.04394
								73.6	0.440386	0.114778	-0.01025	-0.04948			73.6	0.600648	0.185432	0.029294	-0.03906				73.6	0.619786	0.179577	0.022809	-0.04374
								73.8	0.441027	0.114843	-0.01032	-0.04978			73.8	0.602223	0.185776	0.029174	-0.0394				73.8	0.62157	0.180243	0.023164	-0.04368
								74	0.441787	0.114978	-0.01028	-0.04982			74	0.603633	0.18608	0.029175	-0.03978				74	0.623303	0.180774	0.023968	-0.04363
								74.2	0.443046	0.114932	-0.01046	-0.05012			74.2	0.60516	0.186328	0.029368	-0.03995				74.2	0.624171	0.181634	0.02435	-0.04345
								74.4	0.443786	0.11545	-0.01043	-0.05047			74.4	0.60659	0.186926	0.029816	-0.04				74.4	0.625813	0.182427	0.024507	-0.04317
								74.6	0.445221	0.11529	-0.01014	-0.05063			74.6	0.607732	0.187609	0.030231	-0.04022				74.6	0.627121	0.182262	0.025375	-0.0433
								74.8	0.446428	0.115366	-0.00951	-0.05012			74.8	0.608724	0.188449	0.030291	-0.04037				74.8	0.628312	0.183114	0.025879	-0.04353
								75	0.44785	0.115857	-0.00872	-0.04975			75	0.609926	0.188416	0.030414	-0.04018				75	0.629803	0.183699	0.026047	-0.04342
								75.2	0.449376	0.116166	-0.00868	-0.04955			75.2	0.610978	0.188805	0.030724	-0.04025				75.2	0.631631	0.184123	0.026623	-0.04363
								75.4	0.450397	0.11653	-0.00816	-0.04915			75.4	0.612013	0.189146	0.030576	-0.04013				75.4	0.633342	0.184386	0.026666	-0.04344
								75.6	0.451926	0.117001	-0.00811	-0.04898			75.6	0.613059	0.189797	0.030374	-0.04025				75.6	0.634572	0.184818	0.02676	-0.04341
								75.8	0.453314	0.117667	-0.00714	-0.04852			75.8	0.614615	0.190682	0.030098	-0.04012				75.8	0.636504	0.185872	0.026555	-0.04372
								76	0.454559	0.118115	-0.00732	-0.04848			76	0.615774	0.191949	0.030429	-0.04016				76	0.637945	0.186267	0.026464	-0.04364
								76.2	0.455866	0.118571	-0.00668	-0.04841			76.2	0.617454	0.192425	0.030906	-0.03962				76.2	0.639574	0.18744	0.026291	-0.04396
								76.4	0.456996	0.119383	-0.00692	-0.04821			76.4	0.619119	0.192884	0.03078	-0.03933				76.4	0.64107	0.187914	0.0265	-0.04418
								76.6	0.458484	0.119877	-0.00678	-0.0482			76.6	0.620411	0.193618	0.031009	-0.03899				76.6	0.642596	0.188066	0.026499	-0.04407
								76.8	0.459881	0.120396	-0.00647	-0.04794			76.8	0.622074	0.193972	0.031386	-0.03868				76.8	0.643635	0.188666	0.025765	-0.04379
								77	0.461129	0.120746	-0.00614	-0.04798			77	0.623971	0.194651	0.031718	-0.03875				77	0.645056	0.189473	0.025634	-0.04397
								77.2	0.461997	0.120744	-0.00666	-0.04799			77.2	0.62546	0.19479	0.031999	-0.03866				77.2	0.646752	0.190895	0.026273	-0.04401
								77.4	0.462537	0.121179	-0.00693	-0.04771			77.4	0.626534	0.195276	0.032637	-0.03838				77.4	0.648418	0.191702	0.02632	-0.0439
								77.6	0.46316	0.121408	-0.00721	-0.04756			77.6	0.627991	0.195491	0.03295	-0.03809				77.6	0.649058	0.192287	0.026327	-0.04384
								77.8	0.464205	0.121495	-0.00749	-0.04763			77.8	0.6292	0.195479	0.032972	-0.03814				77.8	0.650352	0.192659	0.026887	-0.04394
								78	0.465219	0.122085	-0.00789	-0.0476			78	0.630239	0.195977	0.033303	-0.03799				78	0.651616	0.19339	0.026795	-0.04389
								78.2	0.465635	0.12227	-0.00809	-0.04797			78.2	0.631308	0.196512	0.033562	-0.0382				78.2	0.652182	0.193784	0.027284	-0.04362
								78.4	0.466598	0.12244	-0.00805	-0.04782			78.4	0.632074	0.197946	0.034394	-0.03853				78.4	0.653385	0.193837	0.027273	-0.04372
								78.6	0.467556	0.122795	-0.00764	-0.04786			78.6	0.632994	0.199051	0.034638	-0.03825				78.6	0.65471	0.19405	0.027687	-0.04431
								78.8	0.468468	0.123616	-0.00763	-0.04754			78.8	0.63401	0.199773	0.034558	-0.03809				78.8	0.656097	0.195418	0.027847	-0.04421
								79	0.469121	0.123932	-0.00768	-0.04766			79	0.635353	0.200223	0.034467	-0.03756				79	0.6573	0.195738	0.027983	-0.04396
								79.2	0.470066	0.12453	-0.00805	-0.04772			79.2	0.636247	0.201239	0.034324	-0.03763				79.2	0.658939	0.19618	0.028353	-0.04421
								79.4	0.470659	0.125198	-0.00799	-0.04764			79.4	0.637293	0.201996	0.034238	-0.03805				79.4	0.660361	0.196191	0.028502	-0.04444
								79.6	0.471602	0.125681	-0.00768	-0.04765			79.6	0.638559	0.203	0.034461	-0.03837				79.6	0.661858	0.197072	0.028761	-0.04448
								79.8	0.472315	0.126187	-0.00753	-0.04727			79.8	0.639726	0.203758	0.03506	-0.03842				79.8	0.663519	0.197823	0.029093	-0.04464
								80	0.473339	0.12649	-0.00799	-0.0473			80	0.641362	0.204263	0.035657	-0.03809				80	0.664585	0.198215	0.029516	-0.04464
								80.2	0.474432	0.126818	-0.00747	-0.04744			80.2	0.643444	0.204716	0.03573	-0.03796				80.2	0.666013	0.199061	0.029628	-0.0447
								80.4	0.475774	0.127208	-0.00754	-0.04714			80.4	0.645065	0.205396	0.035976	-0.0382				80.4	0.667421	0.199561	0.029942	-0.04475
								80.6	0.476751	0.127401	-0.00679	-0.04715			80.6	0.646719	0.206205	0.036064	-0.03831				80.6	0.668918	0.19985	0.030079	-0.04427
								80.8	0.477999	0.127454	-0.00694	-0.04695			80.8	0.648734	0.206831	0.036639	-0.03822				80.8	0.67046	0.200493	0.030071	-0.04419
								81	0.479073	0.127885	-0.00646	-0.04739			81	0.650361	0.207433	0.037186	-0.03816				81	0.671823	0.201594	0.030656	-0.04407
								81.2	0.479595	0.128165	-0.007	-0.04753			81.2	0.651582	0.207514	0.037288	-0.03786				81.2	0.673602	0.202255	0.031054	-0.0435
								81.4	0.480316	0.128826	-0.00719	-0.04771			81.4	0.65305	0.207509	0.037281	-0.03774				81.4	0.675056	0.202372	0.030843	-0.04326
								81.6	0.481092	0.129225	-0.007	-0.04777			81.6	0.654673	0.207841	0.037325	-0.03747				81.6	0.676313	0.202685	0.031056	-0.04315
								81.8	0.482026	0.129578	-0.00669	-0.04811			81.8	0.655974	0.207941	0.037562	-0.03769				81.8	0.67792	0.203009	0.031291	-0.04259
								82	0.483591	0.129747	-0.00636	-0.04844			82	0.657759	0.20877	0.038204	-0.03802				82	0.67947	0.20348	0.03107	-0.04275
								82.2	0.484573	0.12966	-0.0059	-0.04886			82.2	0.659088	0.209535	0.037603	-0.03814				82.2	0.680217	0.203285	0.031249	-0.04229
								82.4	0.486011	0.130268	-0.00556	-0.04879			82.4	0.660126	0.210509	0.037739	-0.03808				82.4	0.681703	0.203722	0.031142	-0.04203
								82.6	0.487232	0.130962	-0.00505	-0.04905			82.6	0.661619	0.210568	0.037486	-0.03805				82.6	0.68335	0.204171	0.031044	-0.04194
								82.8	0.488518	0.131369	-0.00485	-0.04894			82.8	0.663018	0.211062	0.037411	-0.03762				82.8	0.684776	0.204684	0.031175	-0.0417
								83	0.48966	0.13204	-0.00483	-0.04922			83	0.664392	0.211711	0.03755	-0.03751				83	0.685819	0.205205	0.031258	-0.04173
								83.2	0.490722	0.133086	-0.00451	-0.04944			83.2	0.665248	0.211982	0.037762	-0.03743				83.2	0.687389	0.2055	0.031865	-0.04216
								83.4	0.491847	0.133919	-0.00412	-0.0494			83.4	0.666639	0.212181	0.038486	-0.0377				83.4	0.688851	0.20592	0.032231	-0.04238
								83.6	0.492608	0.134362	-0.00341	-0.04895			83.6	0.667861	0.212359	0.038789	-0.03747				83.6	0.690176	0.206933	0.032435	-0.04245
								83.8	0.493935	0.134961	-0.00345	-0.04882			83.8	0.66921	0.212557	0.039198	-0.03741				83.8	0.691253	0.207167	0.032781	-0.04262
								84	0.494848	0.135374	-0.00338	-0.04842			84	0.670833	0.212796	0.039779	-0.03728				84	0.692508	0.208019	0.032844	-0.04319
								84.2	0.495839	0.135895	-0.00309	-0.04846			84.2	0.671954	0.213139	0.040126	-0.03724				84.2	0.693813	0.208573	0.032871	-0.04321
								84.4	0.49654	0.136512	-0.00317	-0.0484			84.4	0.673494	0.213767	0.040358	-0.03742				84.4	0.695727	0.208977	0.033183	-0.04346
								84.6	0.496895	0.136715	-0.0032	-0.04845			84.6	0.674905	0.214614	0.040374	-0.03747				84.6	0.697273	0.209968	0.033825	-0.04382
								84.8	0.498262	0.136929	-0.00331	-0.04853			84.8	0.676272	0.215303	0.040932	-0.0377				84.8	0.698275	0.210893	0.034266	-0.04445
								85	0.499335	0.137118	-0.00341	-0.04852			85	0.677887	0.215989	0.040576	-0.03757				85	0.699702	0.211386	0.034772	-0.04438
								85.2	0.500181	0.137534	-0.00382	-0.04832			85.2	0.679431	0.216634	0.040593	-0.03761				85.2	0.701438	0.21216	0.035094	-0.04427
								85.4	0.501524	0.138066	-0.00368	-0.04866			85.4	0.680849	0.217028	0.040501	-0.03733				85.4	0.70283	0.212866	0.036042	-0.04445
								85.6	0.502352	0.138081	-0.00365	-0.04844			85.6	0.682172	0.218095	0.04089	-0.03734				85.6	0.703645	0.213487	0.036248	-0.04437
								85.8	0.503796	0.13863	-0.00318	-0.04845			85.8	0.683779	0.218667	0.041103	-0.03751				85.8	0.704155	0.213975	0.036315	-0.04446
								86	0.505575	0.139019	-0.00299	-0.04839			86	0.685289	0.219576	0.041069	-0.03764				86	0.705671	0.214811	0.036455	-0.04437
								86.2	0.506826	0.139488	-0.00306	-0.04825			86.2	0.686733	0.22035	0.040355	-0.03749				86.2	0.706481	0.215171	0.036519	-0.0435
								86.4	0.507879	0.140219	-0.00297	-0.04766			86.4	0.687807	0.220911	0.04061	-0.03764				86.4	0.707945	0.216417	0.036432	-0.04319
								86.6	0.508926	0.140389	-0.00244	-0.04795			86.6	0.689009	0.221169	0.040856	-0.03776				86.6	0.708962	0.21721	0.036433	-0.04314
								86.8	0.509536	0.140621	-0.00217	-0.0476			86.8	0.690009	0.222199	0.041126	-0.03703				86.8	0.709712	0.217673	0.037083	-0.04304
								87	0.510568	0.140861	-0.00199	-0.04734			87	0.691302	0.222782	0.041083	-0.03682				87	0.71063	0.218295	0.036888	-0.0428
								87.2	0.51127	0.141048	-0.00179	-0.04729			87.2	0.692795	0.222849	0.041367	-0.03661				87.2	0.711887	0.218409	0.037386	-0.04245
								87.4	0.512509	0.141472	-0.0018	-0.04685			87.4	0.693952	0.223532	0.042025	-0.0368				87.4	0.712962	0.219301	0.036991	-0.04239
								87.6	0.513348	0.141891	-0.0013	-0.04671			87.6	0.69508	0.22422	0.04268	-0.03668				87.6	0.713964	0.219565	0.036554	-0.04218
								87.8	0.514308	0.142442	-0.00192	-0.0467			87.8	0.696436	0.224944	0.043033	-0.03668				87.8	0.71559	0.22	0.036951	-0.04225
								88	0.514674	0.14279	-0.00167	-0.04668			88	0.697405	0.225116	0.04384	-0.03664				88	0.717371	0.220694	0.03652	-0.04287
								88.2	0.515312	0.143268	-0.00168	-0.0469			88.2	0.698413	0.225443	0.043845	-0.0369				88.2	0.718808	0.22126	0.036419	-0.04277
								88.4	0.515866	0.143052	-0.00172	-0.04709			88.4	0.699609	0.22618	0.043817	-0.0371				88.4	0.720465	0.222057	0.036308	-0.04342
								88.6	0.516724	0.142687	-0.00161	-0.0466			88.6	0.700569	0.226802	0.04413	-0.03702				88.6	0.721894	0.223067	0.036678	-0.04398
								88.8	0.518079	0.143032	-0.00129	-0.04637			88.8	0.701487	0.226834	0.044621	-0.03723				88.8	0.722885	0.223462	0.036876	-0.0441
								89	0.518557	0.143346	-0.00156	-0.0462			89	0.702889	0.227273	0.044228	-0.03724				89	0.724803	0.223954	0.037244	-0.04395
								89.2	0.519444	0.143802	-0.00123	-0.04656			89.2	0.703868	0.227772	0.044786	-0.03704				89.2	0.726755	0.224361	0.037864	-0.04377
								89.4	0.520328	0.144011	-0.00121	-0.04733			89.4	0.704551	0.228256	0.045139	-0.03694				89.4	0.727893	0.224954	0.03846	-0.04409
								89.6	0.521137	0.144652	-0.00139	-0.04724			89.6	0.705821	0.229063	0.045462	-0.03726				89.6	0.728978	0.225232	0.037849	-0.04463
								89.8	0.522165	0.145338	-0.0009	-0.04752			89.8	0.707127	0.230014	0.045301	-0.03699				89.8	0.730598	0.225646	0.038176	-0.04495
								90	0.523315	0.145996	-0.00115	-0.04765			90	0.70835	0.230376	0.045367	-0.03665				90	0.732603	0.226567	0.038172	-0.04475
								90.2	0.524175	0.146605	-0.0016	-0.04742			90.2	0.709689	0.23109	0.045375	-0.03646				90.2	0.734379	0.226825	0.038582	-0.04497
								90.4	0.525124	0.147136	-0.00125	-0.0477			90.4	0.710465	0.231687	0.04542	-0.03655				90.4	0.735715	0.227434	0.03868	-0.04482
								90.6	0.526145	0.147529	-0.00139	-0.04817			90.6	0.711597	0.232603	0.045351	-0.03669				90.6	0.736707	0.228151	0.039206	-0.04492
								90.8	0.526893	0.148255	-0.00141	-0.04777			90.8	0.713185	0.233279	0.045525	-0.03613				90.8	0.737961	0.228449	0.039743	-0.0447
								91	0.528098	0.148756	-0.00157	-0.04793			91	0.7152	0.233919	0.045276	-0.03563				91	0.739199	0.22905	0.040061	-0.04423
								91.2	0.529351	0.149511	-0.00125	-0.04791			91.2	0.716633	0.234729	0.045378	-0.03561				91.2	0.740471	0.229604	0.040903	-0.04412
								91.4	0.531263	0.15053	-0.00129	-0.04796			91.4	0.718093	0.235797	0.045997	-0.03561				91.4	0.741571	0.230466	0.04097	-0.04395
								91.6	0.532556	0.150796	-0.00102	-0.04817			91.6	0.719977	0.236943	0.04622	-0.03582				91.6	0.74305	0.230699	0.041112	-0.04374
								91.8	0.53372	0.151283	-0.00127	-0.0482			91.8	0.721672	0.237224	0.046333	-0.03586				91.8	0.744326	0.231549	0.042093	-0.04382
								92	0.534645	0.151972	-0.00091	-0.04836			92	0.723229	0.237745	0.046488	-0.03582				92	0.745504	0.231944	0.042221	-0.04323
								92.2	0.535779	0.152001	-0.00069	-0.04837			92.2	0.724957	0.238562	0.046558	-0.03567				92.2	0.746837	0.232856	0.042149	-0.04276
								92.4	0.536855	0.152097	-0.00047	-0.04808			92.4	0.726329	0.239344	0.047267	-0.03537				92.4	0.747642	0.233734	0.042422	-0.04273
								92.6	0.538096	0.152607	-0.00028	-0.0475			92.6	0.727374	0.239587	0.047553	-0.03499				92.6	0.748876	0.234503	0.043186	-0.04197
								92.8	0.538922	0.152977	-5.8e-05	-0.04725			92.8	0.728674	0.240087	0.048245	-0.03511				92.8	0.749646	0.235075	0.043646	-0.04152
								93	0.539737	0.153098	-0.00038	-0.0474			93	0.730056	0.240944	0.048098	-0.03502				93	0.751241	0.235635	0.044258	-0.04126
								93.2	0.540907	0.153563	-0.00013	-0.04783			93.2	0.731639	0.240997	0.048501	-0.03487				93.2	0.752159	0.235767	0.044391	-0.04111
								93.4	0.542248	0.153803	-0.00023	-0.048			93.4	0.732564	0.241492	0.04879	-0.03541				93.4	0.753118	0.236646	0.044619	-0.04149
								93.6	0.542993	0.154421	-2.7e-05	-0.04786			93.6	0.733871	0.24177	0.048702	-0.03526				93.6	0.754318	0.236516	0.044405	-0.04189
								93.8	0.543699	0.154656	0.000367	-0.04782			93.8	0.734676	0.242735	0.048566	-0.03487				93.8	0.755947	0.236929	0.044935	-0.04171
								94	0.544772	0.154866	0.000247	-0.04739			94	0.73526	0.242697	0.048889	-0.03477				94	0.757473	0.237343	0.044889	-0.04175
								94.2	0.546126	0.155027	0.000361	-0.04738			94.2	0.736104	0.243378	0.048971	-0.03505				94.2	0.759278	0.237236	0.045301	-0.04159
								94.4	0.546543	0.155403	0.000483	-0.04777			94.4	0.736779	0.243869	0.048891	-0.03567				94.4	0.760321	0.237656	0.045128	-0.04183
								94.6	0.547455	0.155794	0.000279	-0.04761			94.6	0.737856	0.24423	0.049	-0.0356				94.6	0.761567	0.238381	0.04549	-0.04208
								94.8	0.547759	0.156329	0.00082	-0.04753			94.8	0.739298	0.244358	0.049372	-0.03508				94.8	0.762327	0.238001	0.04577	-0.04235
								95	0.548689	0.156679	0.001141	-0.04764			95	0.740416	0.244826	0.049014	-0.03515				95	0.763198	0.238434	0.046072	-0.04241
								95.2	0.549616	0.157035	0.001415	-0.04748			95.2	0.74095	0.245399	0.049597	-0.03542				95.2	0.764432	0.239042	0.046213	-0.0428
								95.4	0.550592	0.157113	0.001332	-0.04763			95.4	0.742264	0.24599	0.050063	-0.03511				95.4	0.765535	0.239506	0.045977	-0.043
								95.6	0.55111	0.157315	0.001691	-0.0477			95.6	0.743651	0.246403	0.050375	-0.0351				95.6	0.766813	0.240155	0.046257	-0.04332
								95.8	0.551714	0.158045	0.001818	-0.04777			95.8	0.744871	0.246483	0.050714	-0.03503				95.8	0.767993	0.240877	0.046484	-0.0431
								96	0.552191	0.158549	0.002328	-0.04759			96	0.745897	0.247701	0.050936	-0.03477				96	0.769406	0.241662	0.046464	-0.04269
								96.2	0.553142	0.15873	0.00312	-0.0478			96.2	0.747421	0.248307	0.051962	-0.03458				96.2	0.771109	0.242738	0.046366	-0.04299
								96.4	0.553666	0.15964	0.003184	-0.04739			96.4	0.748427	0.249133	0.052541	-0.03431				96.4	0.771517	0.243636	0.046594	-0.04279
								96.6	0.554654	0.160103	0.003289	-0.04744			96.6	0.749798	0.250013	0.052573	-0.03404				96.6	0.772939	0.244484	0.046448	-0.0425
								96.8	0.555612	0.160515	0.003888	-0.04736			96.8	0.751082	0.250837	0.052936	-0.03403				96.8	0.774204	0.245331	0.046056	-0.04241
								97	0.556846	0.160971	0.004248	-0.04729			97	0.752349	0.251127	0.05301	-0.03399				97	0.775415	0.246373	0.045899	-0.04246
								97.2	0.558101	0.161342	0.004472	-0.04717			97.2	0.753529	0.251521	0.053295	-0.03446				97.2	0.77625	0.247335	0.046205	-0.04258
								97.4	0.559188	0.161358	0.004788	-0.04691			97.4	0.754462	0.25254	0.053609	-0.03456				97.4	0.777751	0.248401	0.046246	-0.04234
								97.6	0.559867	0.162079	0.005411	-0.04669			97.6	0.755553	0.253172	0.053327	-0.03444				97.6	0.778719	0.248764	0.046341	-0.04189
								97.8	0.560992	0.161885	0.005701	-0.04617			97.8	0.756326	0.254158	0.053536	-0.03449				97.8	0.780064	0.249379	0.046577	-0.04139
								98	0.562213	0.161922	0.006073	-0.04608			98	0.757708	0.254804	0.053927	-0.03428				98	0.781744	0.249768	0.046348	-0.04088
								98.2	0.563491	0.162284	0.006129	-0.04635			98.2	0.759485	0.255369	0.054365	-0.03434				98.2	0.783423	0.250441	0.046703	-0.04042
								98.4	0.563894	0.162631	0.005841	-0.0463			98.4	0.761123	0.255709	0.054564	-0.03414				98.4	0.784581	0.250777	0.047124	-0.04058
								98.6	0.565193	0.163335	0.006002	-0.04621			98.6	0.762567	0.256426	0.05473	-0.03418				98.6	0.785504	0.250984	0.047657	-0.0405
								98.8	0.566085	0.163434	0.005735	-0.04623			98.8	0.763568	0.256702	0.055098	-0.03425				98.8	0.786733	0.251028	0.048145	-0.04088
								99	0.567126	0.163653	0.005614	-0.04602			99	0.764219	0.257073	0.055498	-0.03462				99	0.788305	0.251716	0.048812	-0.04053
								99.2	0.567874	0.163881	0.005215	-0.04583			99.2	0.764676	0.257602	0.056202	-0.0345				99.2	0.789804	0.25253	0.048913	-0.04076
								99.4	0.569093	0.164056	0.004939	-0.04595			99.4	0.765949	0.258132	0.056575	-0.03443				99.4	0.791575	0.253338	0.048914	-0.04078
								99.6	0.570307	0.164595	0.004927	-0.04626			99.6	0.767199	0.258729	0.056919	-0.0347				99.6	0.793351	0.25386	0.049437	-0.04099
								99.8	0.571694	0.164724	0.004361	-0.04635			99.8	0.76807	0.259473	0.057409	-0.03501				99.8	0.795364	0.254226	0.049432	-0.04098
								100	0.572893	0.16523	0.004458	-0.04661			100	0.76887	0.25984	0.057916	-0.03528				100	0.797586	0.254911	0.049971	-0.04103
								100.2	0.573753	0.165822	0.004459	-0.04687			100.2	0.770478	0.260351	0.058237	-0.03545				100.2	0.799472	0.25552	0.049865	-0.04143
								100.4	0.5745	0.166458	0.003953	-0.04682			100.4	0.771353	0.26103	0.058431	-0.03554				100.4	0.800681	0.255845	0.049722	-0.04145
								100.6	0.575595	0.166735	0.00418	-0.04693			100.6	0.772614	0.261367	0.057866	-0.03597				100.6	0.802461	0.256629	0.049431	-0.04161
								100.8	0.576773	0.167514	0.004551	-0.04652			100.8	0.773686	0.261657	0.058032	-0.03609				100.8	0.803507	0.257428	0.049392	-0.0416
								101	0.577751	0.167852	0.004425	-0.04653			101	0.775272	0.262271	0.058282	-0.03627				101	0.804771	0.258688	0.049423	-0.04156
								101.2	0.578331	0.16828	0.003959	-0.04687			101.2	0.776464	0.262988	0.058212	-0.03612				101.2	0.805634	0.259294	0.050103	-0.04155
								101.4	0.578848	0.168845	0.004508	-0.04681			101.4	0.777798	0.263228	0.057822	-0.03559				101.4	0.807133	0.259946	0.049726	-0.0412
								101.6	0.579435	0.169508	0.005092	-0.04684			101.6	0.778766	0.263587	0.057427	-0.0354				101.6	0.808342	0.260107	0.049933	-0.04112
								101.8	0.580033	0.169368	0.005168	-0.04664			101.8	0.779846	0.264033	0.057183	-0.03476				101.8	0.80914	0.260455	0.049876	-0.04107
								102	0.580862	0.16968	0.005305	-0.04727			102	0.781708	0.264515	0.057401	-0.03401				102	0.810741	0.261008	0.050168	-0.04075
								102.2	0.581436	0.170144	0.00525	-0.04757			102.2	0.782833	0.264627	0.057334	-0.03359				102.2	0.811838	0.261052	0.050268	-0.04068
								102.4	0.58204	0.170751	0.00499	-0.04734			102.4	0.783945	0.265015	0.057045	-0.03293				102.4	0.812539	0.261119	0.050518	-0.04023
								102.6	0.582854	0.171245	0.00522	-0.04754			102.6	0.785087	0.265726	0.056826	-0.03282				102.6	0.813511	0.261295	0.050891	-0.04016
								102.8	0.583673	0.171378	0.004867	-0.04741			102.8	0.785952	0.266476	0.057088	-0.03282				102.8	0.814082	0.261672	0.051548	-0.04016
								103	0.584451	0.171844	0.005271	-0.0473			103	0.787035	0.267541	0.057269	-0.03234				103	0.815192	0.262589	0.051843	-0.03994
								103.2	0.585553	0.171873	0.00521	-0.04725			103.2	0.788245	0.268363	0.057464	-0.03177				103.2	0.81619	0.263674	0.052117	-0.0398
								103.4	0.586737	0.17218	0.005422	-0.0477			103.4	0.789514	0.269018	0.057784	-0.03162				103.4	0.817766	0.263909	0.052551	-0.03977
								103.6	0.587944	0.172892	0.006055	-0.04769			103.6	0.790515	0.269606	0.058146	-0.03153				103.6	0.81927	0.264368	0.05302	-0.04012
								103.8	0.589	0.173293	0.00608	-0.0475			103.8	0.791263	0.270157	0.058736	-0.0318				103.8	0.820803	0.26481	0.053297	-0.03993
								104	0.589735	0.174301	0.006826	-0.04757			104	0.792124	0.270177	0.059089	-0.03204				104	0.821944	0.265528	0.053512	-0.04007
								104.2	0.590346	0.174608	0.007129	-0.04739			104.2	0.793536	0.270625	0.059453	-0.03185				104.2	0.823176	0.266383	0.053826	-0.03993
								104.4	0.591089	0.17534	0.007057	-0.04742			104.4	0.794623	0.271047	0.060065	-0.03163				104.4	0.823673	0.266792	0.054229	-0.0397
								104.6	0.592128	0.175685	0.007224	-0.04713			104.6	0.796351	0.271655	0.060517	-0.03176				104.6	0.824774	0.267765	0.054329	-0.03971
								104.8	0.593329	0.17651	0.007132	-0.04652			104.8	0.797497	0.272181	0.061462	-0.03189				104.8	0.825744	0.268259	0.054054	-0.03967
								105	0.593942	0.176727	0.006883	-0.04672			105	0.798744	0.272243	0.061839	-0.03187				105	0.827297	0.268782	0.054341	-0.03944
								105.2	0.594886	0.176717	0.006867	-0.04667			105.2	0.799864	0.272512	0.062016	-0.03176				105.2	0.828679	0.268839	0.054965	-0.03944
								105.4	0.595982	0.177106	0.007259	-0.04636			105.4	0.800835	0.272746	0.062169	-0.03157				105.4	0.830325	0.269238	0.054932	-0.03973
								105.6	0.596893	0.177276	0.006988	-0.04659			105.6	0.801633	0.273286	0.062586	-0.03182				105.6	0.831464	0.269448	0.055191	-0.03969
								105.8	0.597943	0.177359	0.006289	-0.04679			105.8	0.802814	0.273694	0.062455	-0.03208				105.8	0.832388	0.270103	0.055647	-0.03995
								106	0.598825	0.17788	0.006171	-0.04739			106	0.804148	0.27418	0.06273	-0.03192				106	0.833832	0.270598	0.055772	-0.03987
								106.2	0.599579	0.178475	0.006044	-0.04746			106.2	0.805036	0.274419	0.062378	-0.03166				106.2	0.834936	0.270343	0.055652	-0.03967
								106.4	0.600856	0.179085	0.005746	-0.0473			106.4	0.806447	0.275269	0.062239	-0.03152				106.4	0.836065	0.271526	0.056335	-0.03928
								106.6	0.601489	0.179468	0.005804	-0.04734			106.6	0.807374	0.276164	0.062302	-0.03181				106.6	0.837187	0.271681	0.05669	-0.03956
								106.8	0.602789	0.179552	0.005678	-0.04708			106.8	0.808214	0.276969	0.062489	-0.03219				106.8	0.838177	0.273256	0.05698	-0.03969
								107	0.60341	0.179789	0.006149	-0.04708			107	0.809374	0.277356	0.06258	-0.03182				107	0.840022	0.274593	0.057525	-0.03976
								107.2	0.604277	0.179897	0.0065	-0.04711			107.2	0.81051	0.277458	0.062513	-0.03169				107.2	0.840806	0.275322	0.05816	-0.0399
								107.4	0.605108	0.180531	0.006908	-0.04725			107.4	0.811278	0.277489	0.062661	-0.03155				107.4	0.842035	0.275725	0.057984	-0.03986
								107.6	0.606192	0.181049	0.00747	-0.04707			107.6	0.812193	0.278226	0.063302	-0.03166				107.6	0.843529	0.276828	0.058037	-0.04003
								107.8	0.607159	0.181068	0.007451	-0.04714			107.8	0.813336	0.279024	0.063813	-0.03143				107.8	0.844389	0.277645	0.058241	-0.04016
								108	0.608223	0.181747	0.007379	-0.04747			108	0.814847	0.27936	0.06437	-0.03108				108	0.845391	0.278643	0.058635	-0.03997
								108.2	0.608809	0.181767	0.007299	-0.04733			108.2	0.816464	0.280211	0.064848	-0.0305				108.2	0.846426	0.279001	0.058767	-0.03969
								108.4	0.60971	0.182598	0.007069	-0.04733			108.4	0.818092	0.281331	0.065364	-0.03058				108.4	0.847082	0.279478	0.058485	-0.03987
								108.6	0.610711	0.182652	0.007124	-0.04692			108.6	0.819824	0.282016	0.06582	-0.03081				108.6	0.848652	0.279715	0.057959	-0.03992
								108.8	0.61163	0.182812	0.007259	-0.04624			108.8	0.820593	0.28241	0.066258	-0.03081				108.8	0.850017	0.279637	0.057619	-0.03986
								109	0.612455	0.183207	0.007483	-0.04645			109	0.822082	0.283127	0.06666	-0.03072				109	0.851533	0.280074	0.058698	-0.03998
								109.2	0.613722	0.183128	0.00776	-0.04639			109.2	0.823373	0.283986	0.067009	-0.03058				109.2	0.853283	0.280641	0.059143	-0.04012
								109.4	0.61474	0.1836	0.008068	-0.04635			109.4	0.824169	0.28468	0.067545	-0.03054				109.4	0.854298	0.280927	0.058917	-0.0402
								109.6	0.615353	0.183798	0.007726	-0.04654			109.6	0.825042	0.285081	0.06803	-0.0312				109.6	0.855564	0.281027	0.059072	-0.04011
								109.8	0.616208	0.183917	0.008127	-0.04632			109.8	0.825784	0.285749	0.067675	-0.03082				109.8	0.857049	0.281528	0.059159	-0.04053
								110	0.617099	0.184364	0.008365	-0.04622			110	0.826783	0.286036	0.067475	-0.03021				110	0.858558	0.281767	0.058874	-0.04053
								110.2	0.618205	0.184517	0.008938	-0.0461			110.2	0.827418	0.286726	0.067504	-0.02979				110.2	0.860256	0.281929	0.059103	-0.04039
								110.4	0.619291	0.184992	0.009074	-0.04596			110.4	0.828217	0.28751	0.067271	-0.02944				110.4	0.861494	0.282856	0.059192	-0.0404
								110.6	0.620264	0.184961	0.009723	-0.04609			110.6	0.829301	0.287841	0.067309	-0.02967				110.6	0.862863	0.282901	0.059321	-0.04067
								110.8	0.621153	0.185096	0.010422	-0.04611			110.8	0.830249	0.288156	0.066841	-0.02975				110.8	0.864186	0.284081	0.059599	-0.04052
								111	0.62191	0.185691	0.010839	-0.04616			111	0.831692	0.28859	0.066645	-0.02926				111	0.865228	0.284543	0.059986	-0.04024
								111.2	0.622876	0.185653	0.010975	-0.04667			111.2	0.832647	0.289247	0.066067	-0.02887				111.2	0.865834	0.28472	0.05998	-0.03999
								111.4	0.62357	0.185969	0.010945	-0.047			111.4	0.833707	0.28978	0.066292	-0.02868				111.4	0.867037	0.285141	0.05979	-0.039
								111.6	0.624534	0.186553	0.011427	-0.04694			111.6	0.835104	0.290497	0.06635	-0.02886				111.6	0.868589	0.286212	0.059895	-0.03864
								111.8	0.625363	0.187525	0.011205	-0.04727			111.8	0.837083	0.291264	0.066405	-0.02897				111.8	0.869513	0.286623	0.060338	-0.03853
								112	0.626207	0.188296	0.011272	-0.04798			112	0.83878	0.292126	0.066693	-0.02921				112	0.870311	0.286803	0.06049	-0.0381
								112.2	0.626574	0.189009	0.011362	-0.04787			112.2	0.84037	0.293278	0.066361	-0.02943				112.2	0.870951	0.287565	0.060061	-0.03802
								112.4	0.627637	0.18993	0.011495	-0.04797			112.4	0.84176	0.293658	0.066731	-0.03012				112.4	0.871917	0.288315	0.060234	-0.03768
								112.6	0.627976	0.190404	0.011532	-0.048			112.6	0.842938	0.294278	0.067558	-0.02985				112.6	0.873038	0.288446	0.060502	-0.03778
								112.8	0.62842	0.19094	0.011696	-0.04788			112.8	0.843648	0.294684	0.067864	-0.03027				112.8	0.874138	0.288851	0.06153	-0.03803
								113	0.629152	0.191866	0.011675	-0.04758			113	0.844998	0.294954	0.068028	-0.03034				113	0.874892	0.289836	0.062439	-0.03839
								113.2	0.629988	0.1922	0.01159	-0.04726			113.2	0.846008	0.295143	0.068189	-0.03053				113.2	0.876078	0.290508	0.062733	-0.03832
								113.4	0.630426	0.192548	0.011776	-0.04708			113.4	0.84655	0.295477	0.068349	-0.03081				113.4	0.876712	0.290725	0.06281	-0.03806
								113.6	0.631236	0.192943	0.011667	-0.04686			113.6	0.847557	0.296084	0.068434	-0.0311				113.6	0.878166	0.291498	0.062876	-0.03866
								113.8	0.632305	0.193114	0.011913	-0.04658			113.8	0.848605	0.296795	0.068429	-0.03099				113.8	0.879224	0.292291	0.062849	-0.03914
								114	0.632951	0.193613	0.011698	-0.04681			114	0.850029	0.296937	0.068465	-0.03106				114	0.880547	0.292614	0.063141	-0.03926
								114.2	0.633931	0.194146	0.012305	-0.0467			114.2	0.850862	0.297589	0.068943	-0.03105				114.2	0.881656	0.29314	0.063302	-0.0394
								114.4	0.634223	0.194394	0.012454	-0.04666			114.4	0.851764	0.29792	0.068754	-0.03138				114.4	0.88264	0.293514	0.063572	-0.03945
								114.6	0.635495	0.194292	0.013204	-0.04674			114.6	0.852776	0.298162	0.068445	-0.03164				114.6	0.884027	0.29391	0.063701	-0.03936
								114.8	0.635657	0.19447	0.013739	-0.04682			114.8	0.853653	0.298717	0.068423	-0.03169				114.8	0.885482	0.294524	0.06342	-0.03899
								115	0.63663	0.194414	0.013849	-0.04717			115	0.855091	0.299237	0.068547	-0.03143				115	0.886278	0.295209	0.063275	-0.03872
								115.2	0.637492	0.194208	0.013939	-0.04758			115.2	0.855656	0.299623	0.06856	-0.031				115.2	0.887432	0.295517	0.063404	-0.03863
								115.4	0.638747	0.19457	0.014236	-0.04769			115.4	0.856569	0.29998	0.069097	-0.03114				115.4	0.889135	0.296333	0.063195	-0.03834
								115.6	0.640098	0.195103	0.01499	-0.04748			115.6	0.857598	0.300384	0.069318	-0.03153				115.6	0.89059	0.296954	0.063479	-0.03875
								115.8	0.641277	0.195727	0.014718	-0.04762			115.8	0.859008	0.301264	0.069784	-0.03175				115.8	0.891972	0.297588	0.063673	-0.03913
								116	0.642234	0.195952	0.014581	-0.04818			116	0.859777	0.302031	0.070513	-0.03193				116	0.892859	0.298514	0.063716	-0.03944
								116.2	0.642974	0.196295	0.014451	-0.04791			116.2	0.860856	0.302679	0.070608	-0.03174				116.2	0.894116	0.299372	0.063909	-0.03962
								116.4	0.64391	0.196421	0.014819	-0.04784			116.4	0.861591	0.302443	0.071293	-0.03168				116.4	0.894851	0.299701	0.064516	-0.03958
								116.6	0.644277	0.196806	0.014561	-0.04779			116.6	0.862396	0.303161	0.07176	-0.0312				116.6	0.896273	0.300501	0.064694	-0.04027
								116.8	0.645135	0.196992	0.014687	-0.04735			116.8	0.862907	0.303238	0.071722	-0.03104				116.8	0.89726	0.301015	0.065255	-0.04033
								117	0.646442	0.197439	0.014728	-0.0466			117	0.864071	0.303751	0.072134	-0.02997				117	0.897988	0.301622	0.06572	-0.04052
								117.2	0.64679	0.198129	0.015024	-0.04612			117.2	0.865017	0.304337	0.072153	-0.02992				117.2	0.899588	0.302293	0.066329	-0.0404
								117.4	0.647315	0.198524	0.015198	-0.04583			117.4	0.865801	0.304806	0.072491	-0.02976				117.4	0.900746	0.302747	0.066686	-0.04071
								117.6	0.648312	0.199208	0.015188	-0.04562			117.6	0.867035	0.305799	0.072656	-0.03004				117.6	0.902044	0.303705	0.066344	-0.04067
								117.8	0.648712	0.19995	0.01515	-0.04561			117.8	0.868705	0.306148	0.073048	-0.03008				117.8	0.902801	0.304096	0.066512	-0.04031
								118	0.649402	0.200713	0.015319	-0.04562			118	0.869991	0.306388	0.073199	-0.03014				118	0.904011	0.304495	0.066833	-0.03989
								118.2	0.650155	0.20127	0.015658	-0.04506			118.2	0.871231	0.306836	0.073793	-0.03007				118.2	0.904736	0.305006	0.066536	-0.0397
								118.4	0.650871	0.201432	0.015811	-0.04525			118.4	0.872088	0.307639	0.074016	-0.03021				118.4	0.905383	0.305143	0.066748	-0.0392
								118.6	0.65224	0.201707	0.016007	-0.04508			118.6	0.873451	0.30777	0.074133	-0.02992				118.6	0.906523	0.305273	0.066391	-0.03885
								118.8	0.65267	0.202233	0.01634	-0.04532			118.8	0.87558	0.308007	0.074723	-0.03007				118.8	0.90772	0.305421	0.066581	-0.03833
								119	0.653884	0.202583	0.01656	-0.04524			119	0.87646	0.308471	0.074832	-0.02967				119	0.908077	0.305954	0.067267	-0.0382
								119.2	0.654775	0.203087	0.016504	-0.04566			119.2	0.877578	0.308748	0.07574	-0.02962				119.2	0.909448	0.305983	0.067517	-0.03811
								119.4	0.656129	0.20376	0.016783	-0.0456			119.4	0.878738	0.309567	0.076324	-0.02998				119.4	0.910324	0.306237	0.067701	-0.03765
								119.6	0.657128	0.204439	0.016492	-0.04542			119.6	0.879859	0.309891	0.076458	-0.03003				119.6	0.911731	0.306152	0.068019	-0.03776
								119.8	0.658472	0.204941	0.016026	-0.04563			119.8	0.881541	0.310569	0.076806	-0.02987				119.8	0.913019	0.306971	0.068168	-0.03745
								120	0.65955	0.205191	0.015668	-0.04608			120	0.882636	0.311499	0.077116	-0.02992				120	0.913886	0.307093	0.068382	-0.03753
								120.2	0.660386	0.205192	0.015605	-0.04582			120.2	0.883522	0.312445	0.077265	-0.02976				120.2	0.915077	0.307796	0.068535	-0.03715
								120.4	0.661332	0.205225	0.015809	-0.04544			120.4	0.883848	0.312976	0.077269	-0.02951				120.4	0.916247	0.308449	0.068663	-0.03681
								120.6	0.661786	0.205745	0.015245	-0.04512			120.6	0.88516	0.314155	0.077211	-0.02891				120.6	0.918305	0.308768	0.068748	-0.03717
								120.8	0.662968	0.205879	0.015482	-0.04445			120.8	0.886249	0.314457	0.077251	-0.02868				120.8	0.919316	0.30903	0.06926	-0.03692
								121	0.663674	0.206606	0.015463	-0.04401			121	0.887183	0.315088	0.077158	-0.02819				121	0.920803	0.309493	0.069468	-0.03687
								121.2	0.664095	0.207402	0.015262	-0.04346			121.2	0.888177	0.315526	0.077245	-0.02854				121.2	0.922494	0.31069	0.069825	-0.03676
								121.4	0.665482	0.207819	0.014928	-0.04339			121.4	0.888924	0.315935	0.077425	-0.02821				121.4	0.923877	0.311354	0.069873	-0.0368
								121.6	0.666457	0.208098	0.015014	-0.04364			121.6	0.88989	0.316634	0.077388	-0.02876				121.6	0.924863	0.312226	0.06978	-0.03647
								121.8	0.667494	0.208634	0.015142	-0.04416			121.8	0.891259	0.316877	0.077639	-0.02876				121.8	0.925789	0.312895	0.070127	-0.03691
								122	0.668781	0.208708	0.014911	-0.04432			122	0.892128	0.317275	0.077863	-0.02881				122	0.926945	0.313539	0.06991	-0.03718
								122.2	0.66926	0.209061	0.014934	-0.04465			122.2	0.893262	0.317868	0.078334	-0.02883				122.2	0.927974	0.314245	0.07003	-0.03717
								122.4	0.669959	0.209278	0.015199	-0.04483			122.4	0.894095	0.318309	0.078541	-0.02911				122.4	0.928985	0.315194	0.070243	-0.03726
								122.6	0.670334	0.209689	0.015349	-0.04478			122.6	0.895829	0.31823	0.078426	-0.02934				122.6	0.930097	0.315922	0.070567	-0.0373
								122.8	0.670681	0.210145	0.015977	-0.04509			122.8	0.897365	0.318259	0.078685	-0.02976				122.8	0.931011	0.316679	0.070955	-0.03767
								123	0.671325	0.210517	0.01634	-0.04555			123	0.897479	0.318933	0.078802	-0.0298				123	0.931621	0.317615	0.071667	-0.03802
								123.2	0.671626	0.210971	0.016434	-0.04608			123.2	0.898637	0.319166	0.079454	-0.02999				123.2	0.932596	0.317937	0.071653	-0.03803
								123.4	0.672608	0.211644	0.016829	-0.04558			123.4	0.899745	0.319796	0.079344	-0.03001				123.4	0.933484	0.318277	0.07194	-0.03812
								123.6	0.67298	0.211855	0.016874	-0.04615			123.6	0.900848	0.320324	0.079038	-0.0302				123.6	0.93512	0.319123	0.072073	-0.03857
								123.8	0.673742	0.21258	0.017314	-0.04608			123.8	0.901826	0.320985	0.079085	-0.03022				123.8	0.935785	0.320018	0.072723	-0.03828
								124	0.674369	0.212819	0.017448	-0.04551			124	0.902717	0.321556	0.078852	-0.03039				124	0.93676	0.320537	0.072775	-0.03815
								124.2	0.674932	0.212891	0.017741	-0.04488			124.2	0.90348	0.322209	0.078804	-0.03058				124.2	0.938207	0.321269	0.073203	-0.03782
								124.4	0.675411	0.213226	0.018005	-0.04495			124.4	0.9045	0.322588	0.078541	-0.03039				124.4	0.939615	0.321521	0.073513	-0.03779
								124.6	0.676082	0.213908	0.018201	-0.04446			124.6	0.905917	0.323168	0.078984	-0.02999				124.6	0.940499	0.321946	0.073496	-0.03781
								124.8	0.677182	0.214341	0.01882	-0.04382			124.8	0.906372	0.323441	0.079455	-0.03009				124.8	0.941158	0.322366	0.073632	-0.03749
								125	0.677977	0.21477	0.018776	-0.04369			125	0.906749	0.32387	0.080241	-0.02957				125	0.942688	0.322916	0.073746	-0.03711
								125.2	0.679563	0.215146	0.018703	-0.04352			125.2	0.907282	0.324024	0.081043	-0.02981				125.2	0.943414	0.323925	0.074072	-0.03691
								125.4	0.680793	0.21513	0.01878	-0.04356			125.4	0.907974	0.324578	0.08163	-0.0294				125.4	0.944422	0.324098	0.073945	-0.03663
								125.6	0.681913	0.215167	0.019446	-0.04403			125.6	0.908993	0.325613	0.082113	-0.02963				125.6	0.945457	0.324819	0.07411	-0.0368
								125.8	0.683226	0.215405	0.019387	-0.04454			125.8	0.909927	0.3261	0.082607	-0.02967				125.8	0.946809	0.325173	0.073999	-0.03661
								126	0.684407	0.215411	0.0189	-0.0447			126	0.910873	0.326836	0.082917	-0.02945				126	0.948313	0.325943	0.073981	-0.03639
								126.2	0.68548	0.215618	0.019122	-0.04467			126.2	0.912348	0.327318	0.08344	-0.02918				126.2	0.949391	0.326836	0.073976	-0.03624
								126.4	0.686483	0.215589	0.018877	-0.04454			126.4	0.913237	0.327834	0.083577	-0.02851				126.4	0.950191	0.327432	0.074034	-0.03649
								126.6	0.687272	0.215711	0.01855	-0.04442			126.6	0.914473	0.328116	0.083417	-0.02858				126.6	0.950865	0.327884	0.07418	-0.0363
								126.8	0.688205	0.215952	0.018431	-0.04407			126.8	0.915231	0.328738	0.084072	-0.02853				126.8	0.951985	0.328235	0.074408	-0.03657
								127	0.688899	0.2163	0.018512	-0.04408			127	0.916118	0.329477	0.084094	-0.02797				127	0.952874	0.328879	0.075008	-0.03657
								127.2	0.689447	0.216553	0.018493	-0.04345			127.2	0.917365	0.329752	0.084117	-0.02817				127.2	0.953606	0.329358	0.075033	-0.03667
								127.4	0.689765	0.217315	0.01902	-0.04346			127.4	0.918466	0.33069	0.083681	-0.02811				127.4	0.954962	0.329787	0.075246	-0.03685
								127.6	0.690341	0.217561	0.01941	-0.04355			127.6	0.919595	0.331126	0.083334	-0.02836				127.6	0.956017	0.330712	0.075457	-0.03656
								127.8	0.69105	0.218574	0.019706	-0.04297			127.8	0.920751	0.331435	0.083304	-0.02816				127.8	0.956784	0.330866	0.075809	-0.03607
								128	0.691811	0.21863	0.019793	-0.04264			128	0.922359	0.331861	0.083304	-0.02814				128	0.958084	0.33107	0.075808	-0.03582
								128.2	0.692434	0.218973	0.020013	-0.04299			128.2	0.923462	0.332331	0.083601	-0.02826				128.2	0.959048	0.331321	0.076144	-0.0358
								128.4	0.692817	0.21959	0.020342	-0.04337			128.4	0.924489	0.333353	0.083762	-0.02822				128.4	0.960045	0.331768	0.076464	-0.0357
								128.6	0.693813	0.220135	0.020907	-0.04296			128.6	0.925232	0.334009	0.084274	-0.0277				128.6	0.960522	0.331704	0.076864	-0.03581
								128.8	0.694745	0.22095	0.021107	-0.04333			128.8	0.926279	0.334589	0.084694	-0.02753				128.8	0.961452	0.332123	0.07721	-0.03581
								129	0.696004	0.221102	0.021149	-0.04386			129	0.927008	0.335351	0.085228	-0.02732				129	0.962203	0.333181	0.07752	-0.03581
								129.2	0.697142	0.221536	0.021247	-0.04467			129.2	0.927637	0.335911	0.085872	-0.02733				129.2	0.96289	0.334001	0.077922	-0.03556
								129.4	0.697847	0.2217	0.021798	-0.04489			129.4	0.928843	0.337363	0.086006	-0.02721				129.4	0.964222	0.334182	0.07817	-0.03548
								129.6	0.699249	0.222273	0.022279	-0.04554			129.6	0.929483	0.338173	0.086281	-0.0275				129.6	0.966011	0.335011	0.078731	-0.03565
								129.8	0.700319	0.222678	0.021887	-0.04606			129.8	0.930305	0.338391	0.086605	-0.02756				129.8	0.967397	0.335462	0.078932	-0.03555
								130	0.701558	0.223067	0.021609	-0.0462			130	0.93144	0.339144	0.086738	-0.02724				130	0.968742	0.336431	0.078973	-0.03577
								130.2	0.702697	0.223607	0.021733	-0.04614			130.2	0.932308	0.339596	0.08718	-0.02647				130.2	0.969748	0.337254	0.078983	-0.03581
								130.4	0.703422	0.223791	0.021439	-0.04637			130.4	0.932978	0.339969	0.087427	-0.02639				130.4	0.97091	0.337743	0.079575	-0.03586
								130.6	0.704127	0.224367	0.021805	-0.04616			130.6	0.933904	0.340079	0.087484	-0.02706				130.6	0.972372	0.338148	0.079711	-0.03594
								130.8	0.704916	0.225229	0.02194	-0.04619			130.8	0.934715	0.340509	0.087766	-0.02716				130.8	0.973861	0.3385	0.080019	-0.03605
								131	0.705317	0.225625	0.022139	-0.04614			131	0.935286	0.34095	0.087912	-0.0275				131	0.975136	0.339555	0.079913	-0.03621
								131.2	0.706048	0.226042	0.021963	-0.04609			131.2	0.936072	0.341444	0.088034	-0.02824				131.2	0.976303	0.340076	0.079723	-0.03575
								131.4	0.706259	0.226547	0.022336	-0.04617			131.4	0.937224	0.34203	0.088112	-0.02793				131.4	0.978001	0.339928	0.079588	-0.03556
								131.6	0.707387	0.226968	0.022497	-0.04581			131.6	0.938179	0.34216	0.088176	-0.02855				131.6	0.979168	0.340368	0.079467	-0.03524
								131.8	0.707752	0.227025	0.022299	-0.04571			131.8	0.939397	0.342393	0.088589	-0.02849				131.8	0.980791	0.340636	0.079597	-0.0347
								132	0.708406	0.227196	0.021989	-0.04533			132	0.940517	0.342928	0.088994	-0.02836				132	0.982108	0.340866	0.079594	-0.03434
								132.2	0.709014	0.22774	0.022029	-0.04523			132.2	0.941645	0.34339	0.089344	-0.0283				132.2	0.983029	0.341307	0.080105	-0.03431
								132.4	0.709502	0.228477	0.022071	-0.04502			132.4	0.942808	0.344375	0.089719	-0.02816				132.4	0.984118	0.341404	0.080549	-0.03433
								132.6	0.710525	0.228956	0.022075	-0.04498			132.6	0.943663	0.344865	0.090699	-0.0276				132.6	0.985077	0.342133	0.080856	-0.03428
								132.8	0.711042	0.229395	0.021894	-0.04524			132.8	0.945032	0.34548	0.091374	-0.02751				132.8	0.986001	0.342961	0.080954	-0.03437
								133	0.711406	0.229465	0.022093	-0.04487			133	0.946016	0.346661	0.092039	-0.02749				133	0.986809	0.343833	0.081359	-0.03451
								133.2	0.711552	0.229997	0.022282	-0.04471			133.2	0.947068	0.347144	0.092447	-0.02694				133.2	0.988239	0.344384	0.081524	-0.03414
								133.4	0.7123	0.23027	0.022715	-0.04435			133.4	0.947968	0.347572	0.092329	-0.02697				133.4	0.989304	0.344734	0.081486	-0.03414
								133.6	0.712908	0.230484	0.022854	-0.04419			133.6	0.949469	0.34774	0.092751	-0.02648				133.6	0.990661	0.345273	0.0817	-0.03442
								133.8	0.713331	0.230718	0.022956	-0.04427			133.8	0.95103	0.348074	0.092855	-0.02593				133.8	0.991345	0.346215	0.081777	-0.03484
								134	0.713939	0.230674	0.02317	-0.04399			134	0.952036	0.34854	0.092918	-0.02587				134	0.992028	0.347104	0.081529	-0.03514
								134.2	0.714669	0.230809	0.023411	-0.04399			134.2	0.952833	0.348513	0.093154	-0.02563				134.2	0.992632	0.347631	0.08179	-0.03577
								134.4	0.715194	0.231035	0.023654	-0.04385			134.4	0.953967	0.34846	0.093146	-0.02596				134.4	0.993742	0.348066	0.081561	-0.03599
								134.6	0.715745	0.231331	0.023879	-0.04379			134.6	0.954811	0.348982	0.092943	-0.02581				134.6	0.994502	0.348304	0.08096	-0.03617
								134.8	0.716159	0.231526	0.023348	-0.04393			134.8	0.955494	0.349816	0.093138	-0.02578				134.8	0.995467	0.348687	0.080724	-0.03579
								135	0.716737	0.231215	0.023145	-0.04388			135	0.955672	0.350722	0.09353	-0.02586				135	0.99621	0.349042	0.080629	-0.03573
								135.2	0.717606	0.231058	0.022915	-0.04395			135.2	0.956313	0.351166	0.093318	-0.02609				135.2	0.997081	0.348746	0.080471	-0.03554
								135.4	0.718476	0.231046	0.022999	-0.04396			135.4	0.956972	0.351627	0.093143	-0.02595				135.4	0.998292	0.348648	0.080749	-0.03546
								135.6	0.719844	0.231622	0.022998	-0.04396			135.6	0.95741	0.352028	0.093488	-0.02654				135.6	0.999383	0.349305	0.081325	-0.03499
								135.8	0.720709	0.231745	0.022643	-0.04378			135.8	0.958314	0.352554	0.093755	-0.02641				135.8	1.00076	0.349386	0.082336	-0.03474
								136	0.721708	0.232353	0.022339	-0.04365			136	0.959196	0.353094	0.094147	-0.02625				136	1.00154	0.349629	0.083445	-0.03482
								136.2	0.722503	0.233159	0.022416	-0.04376			136.2	0.960309	0.353708	0.094086	-0.02675				136.2	1.00248	0.349853	0.08427	-0.03511
								136.4	0.723365	0.233807	0.022791	-0.04401			136.4	0.961407	0.354522	0.0942	-0.02715				136.4	1.00304	0.350363	0.085098	-0.03485
								136.6	0.724493	0.234329	0.023033	-0.04426			136.6	0.962515	0.355466	0.09429	-0.02753				136.6	1.00397	0.351216	0.085807	-0.03441
								136.8	0.725123	0.234706	0.023075	-0.04447			136.8	0.963617	0.355969	0.094165	-0.02784				136.8	1.00482	0.351558	0.086538	-0.03434
								137	0.725861	0.235265	0.023434	-0.04402			137	0.964654	0.356416	0.094434	-0.02758				137	1.00544	0.352443	0.086807	-0.0338
								137.2	0.726595	0.236003	0.024113	-0.04418			137.2	0.965495	0.356406	0.094494	-0.02723				137.2	1.00673	0.352847	0.087063	-0.03344
								137.4	0.727688	0.236376	0.024653	-0.04434			137.4	0.966456	0.356791	0.094377	-0.02721				137.4	1.00724	0.353865	0.087387	-0.03357
								137.6	0.728334	0.23689	0.025027	-0.04436			137.6	0.967956	0.357471	0.0946	-0.02673				137.6	1.00816	0.354483	0.087809	-0.03392
								137.8	0.729136	0.237046	0.02554	-0.04485			137.8	0.968678	0.357965	0.094555	-0.02708				137.8	1.00857	0.355828	0.088061	-0.0342
								138	0.730077	0.236824	0.025959	-0.04459			138	0.969431	0.358122	0.094737	-0.02714				138	1.00858	0.356462	0.087755	-0.03423
								138.2	0.730796	0.237442	0.02623	-0.04442			138.2	0.970045	0.358494	0.094966	-0.02686				138.2	1.00946	0.356675	0.08785	-0.03432
								138.4	0.731124	0.238049	0.02616	-0.04366			138.4	0.97086	0.358852	0.095319	-0.02647				138.4	1.01036	0.357216	0.087741	-0.0338
								138.6	0.73185	0.238455	0.026379	-0.04381			138.6	0.971632	0.360021	0.09546	-0.0259				138.6	1.01107	0.357545	0.087397	-0.03379
								138.8	0.732723	0.238948	0.026536	-0.04378			138.8	0.97221	0.360836	0.095716	-0.0256				138.8	1.01235	0.357989	0.087598	-0.03362
								139	0.733865	0.239398	0.026697	-0.044			139	0.972891	0.361528	0.096282	-0.02514				139	1.01326	0.358556	0.087735	-0.03362
								139.2	0.73489	0.239895	0.026417	-0.04426			139.2	0.973524	0.361732	0.096655	-0.02486				139.2	1.01426	0.358807	0.087655	-0.03339
								139.4	0.735904	0.240611	0.026588	-0.04429			139.4	0.97454	0.36171	0.097121	-0.02478				139.4	1.01546	0.358963	0.088109	-0.03333
								139.6	0.737121	0.241157	0.026679	-0.04427			139.6	0.975873	0.362085	0.097735	-0.02468				139.6	1.01664	0.359275	0.088735	-0.03335
								139.8	0.738222	0.241222	0.026696	-0.04428			139.8	0.977255	0.362413	0.097671	-0.02445				139.8	1.0178	0.359214	0.089492	-0.03364
								140	0.738931	0.241424	0.026845	-0.04398			140	0.978611	0.362341	0.097985	-0.02442				140	1.01877	0.359821	0.089606	-0.03387
								140.2	0.73974	0.241844	0.027199	-0.04392			140.2	0.979849	0.363032	0.097658	-0.02503				140.2	1.01951	0.360005	0.08961	-0.03439
								140.4	0.740857	0.242131	0.02741	-0.04391			140.4	0.980795	0.363536	0.097426	-0.02475				140.4	1.02015	0.36061	0.090002	-0.03437
								140.6	0.741899	0.242506	0.027457	-0.04428			140.6	0.982032	0.363612	0.097799	-0.02468				140.6	1.02118	0.360732	0.089913	-0.03472
								140.8	0.742496	0.242299	0.027182	-0.04434			140.8	0.982487	0.363884	0.098051	-0.02483				140.8	1.02276	0.361057	0.090134	-0.03503
								141	0.742984	0.242597	0.02747	-0.04424			141	0.984046	0.36414	0.098785	-0.02491				141	1.02378	0.361402	0.090058	-0.03524
								141.2	0.743185	0.243136	0.027727	-0.04431			141.2	0.984837	0.365113	0.098867	-0.02482				141.2	1.02525	0.361811	0.090404	-0.0355
								141.4	0.743593	0.243464	0.027857	-0.04378			141.4	0.985982	0.36613	0.098617	-0.02492				141.4	1.02636	0.362655	0.090878	-0.03592
								141.6	0.7442	0.243716	0.027958	-0.04336			141.6	0.986909	0.36688	0.098871	-0.02511				141.6	1.02754	0.362955	0.091029	-0.03602
								141.8	0.744794	0.243412	0.028137	-0.04331			141.8	0.988039	0.367515	0.099076	-0.02545				141.8	1.02835	0.363801	0.091286	-0.03583
								142	0.745708	0.243713	0.028275	-0.04268			142	0.989007	0.367867	0.099063	-0.02529				142	1.0292	0.364167	0.091225	-0.03545
								142.2	0.745902	0.244215	0.028069	-0.04245			142.2	0.989832	0.368639	0.098965	-0.02517				142.2	1.03068	0.364375	0.091574	-0.03528
								142.4	0.746274	0.244547	0.027553	-0.04257			142.4	0.990695	0.369462	0.099052	-0.02485				142.4	1.03133	0.365488	0.091923	-0.03488
								142.6	0.747228	0.245082	0.02827	-0.04273			142.6	0.991815	0.37048	0.098733	-0.02465				142.6	1.03219	0.366478	0.091871	-0.03456
								142.8	0.747839	0.245415	0.02811	-0.04303			142.8	0.992445	0.371273	0.098717	-0.02466				142.8	1.03352	0.367408	0.092583	-0.03414
								143	0.748447	0.245617	0.027977	-0.04345			143	0.993563	0.37192	0.098999	-0.02472				143	1.03403	0.368126	0.092585	-0.03381
								143.2	0.749366	0.246065	0.028178	-0.04368			143.2	0.994014	0.371935	0.098813	-0.02491				143.2	1.03496	0.368839	0.092286	-0.0331
								143.4	0.749825	0.246937	0.028979	-0.04392			143.4	0.994775	0.372136	0.098601	-0.02519				143.4	1.03643	0.369803	0.092603	-0.03254
								143.6	0.750643	0.246855	0.029419	-0.04405			143.6	0.995882	0.372842	0.098821	-0.02494				143.6	1.03698	0.370797	0.09263	-0.03221
								143.8	0.751584	0.247127	0.029977	-0.04428			143.8	0.996489	0.372889	0.0986	-0.02512				143.8	1.03791	0.371752	0.092513	-0.03216
								144	0.752184	0.247254	0.030314	-0.04423			144	0.996956	0.373255	0.098917	-0.02504				144	1.0386	0.372322	0.092382	-0.03264
								144.2	0.753223	0.24769	0.030329	-0.04469			144.2	0.997754	0.373686	0.098886	-0.0249				144.2	1.03913	0.372588	0.093061	-0.03298
								144.4	0.75417	0.24815	0.03089	-0.04507			144.4	0.998151	0.373833	0.099031	-0.02447				144.4	1.03989	0.372786	0.092901	-0.03306
								144.6	0.754832	0.248722	0.030931	-0.04536			144.6	0.998927	0.373833	0.099683	-0.02455				144.6	1.04088	0.372781	0.09282	-0.0334
								144.8	0.755257	0.24876	0.030909	-0.04534			144.8	0.999596	0.374361	0.100329	-0.02455				144.8	1.04216	0.373322	0.092855	-0.03353
								145	0.755941	0.249708	0.031198	-0.04513			145	1.00067	0.374416	0.10098	-0.02465				145	1.04278	0.373469	0.093403	-0.03369
								145.2	0.756238	0.250115	0.031166	-0.04481			145.2	1.00126	0.375091	0.101168	-0.02416				145.2	1.04411	0.37391	0.093944	-0.03369
								145.4	0.756966	0.250521	0.031016	-0.0446			145.4	1.0023	0.375244	0.101682	-0.02459				145.4	1.04495	0.373836	0.094094	-0.03404
								145.6	0.757755	0.250452	0.030712	-0.04459			145.6	1.00304	0.375557	0.102415	-0.02478				145.6	1.04611	0.374203	0.093905	-0.03384
								145.8	0.75808	0.250841	0.030351	-0.04462			145.8	1.00417	0.376388	0.103173	-0.0242				145.8	1.04718	0.374593	0.094118	-0.03404
								146	0.758899	0.25118	0.029969	-0.04441			146	1.00461	0.376909	0.103275	-0.02389				146	1.04835	0.374647	0.094298	-0.03409
								146.2	0.759736	0.251259	0.029195	-0.04425			146.2	1.00539	0.377848	0.103477	-0.02332				146.2	1.04947	0.374837	0.094288	-0.0344
								146.4	0.760166	0.251285	0.028999	-0.04431			146.4	1.00609	0.378768	0.103886	-0.02328				146.4	1.05039	0.375629	0.094484	-0.0342
								146.6	0.761405	0.251626	0.028994	-0.04377			146.6	1.00688	0.37937	0.103748	-0.02354				146.6	1.05154	0.37621	0.094691	-0.03345
								146.8	0.762139	0.251874	0.028328	-0.04362			146.8	1.00757	0.38047	0.103665	-0.02335				146.8	1.05272	0.376694	0.095119	-0.03351
								147	0.763261	0.252413	0.028462	-0.04337			147	1.00861	0.38082	0.104039	-0.02331				147	1.05348	0.377708	0.094941	-0.03316
								147.2	0.764131	0.253546	0.028993	-0.04327			147.2	1.00946	0.381458	0.104246	-0.02307				147.2	1.05465	0.378836	0.094726	-0.0327
								147.4	0.76429	0.254276	0.029368	-0.04336			147.4	1.01028	0.382446	0.104139	-0.0227				147.4	1.0558	0.379894	0.094922	-0.03217
								147.6	0.764996	0.254014	0.030034	-0.04321			147.6	1.01117	0.383387	0.104195	-0.02276				147.6	1.0565	0.380469	0.094608	-0.03231
								147.8	0.765925	0.254419	0.030676	-0.04361			147.8	1.01226	0.384249	0.103782	-0.02257				147.8	1.05761	0.381269	0.094745	-0.03222
								148	0.766552	0.254612	0.03101	-0.04345			148	1.01328	0.385204	0.103888	-0.02217				148	1.05842	0.381246	0.095246	-0.03201
								148.2	0.767381	0.255266	0.031658	-0.04359			148.2	1.01443	0.385599	0.103876	-0.02187				148.2	1.05948	0.381571	0.09576	-0.0319
								148.4	0.767887	0.255806	0.032332	-0.04342			148.4	1.01496	0.386148	0.104154	-0.0214				148.4	1.06038	0.38187	0.095203	-0.03222
								148.6	0.768542	0.25643	0.032252	-0.04352			148.6	1.01645	0.386475	0.104278	-0.02108				148.6	1.06125	0.382549	0.095014	-0.03224
								148.8	0.769312	0.256377	0.032718	-0.0436			148.8	1.01769	0.386692	0.10499	-0.02106				148.8	1.06181	0.38302	0.094902	-0.03203
								149	0.769996	0.256796	0.033355	-0.0435			149	1.01858	0.386585	0.105369	-0.02121				149	1.06256	0.383049	0.095749	-0.03228
								149.2	0.770275	0.25683	0.033157	-0.04356			149.2	1.01953	0.387004	0.105712	-0.02081				149.2	1.06344	0.383551	0.095671	-0.03222
								149.4	0.770665	0.257395	0.032932	-0.04348			149.4	1.02062	0.386906	0.106509	-0.02109				149.4	1.0641	0.383683	0.095664	-0.03219
								149.6	0.771137	0.257922	0.033337	-0.04328			149.6	1.02173	0.387626	0.107178	-0.0212				149.6	1.06553	0.384438	0.096099	-0.03249
								149.8	0.771845	0.258186	0.033276	-0.0431			149.8	1.02291	0.388197	0.107831	-0.02045				149.8	1.06639	0.384472	0.096275	-0.03295
								150	0.773178	0.258418	0.033121	-0.0429			150	1.02398	0.388027	0.107749	-0.02065				150	1.06717	0.385084	0.09643	-0.03287
								150.2	0.77424	0.258812	0.033101	-0.0433			150.2	1.02524	0.38828	0.10806	-0.02062				150.2	1.06795	0.385764	0.096383	-0.03299
								150.4	0.774642	0.258816	0.033171	-0.0434			150.4	1.02607	0.388671	0.108426	-0.02102				150.4	1.06877	0.386775	0.096899	-0.03251
								150.6	0.776112	0.259321	0.03252	-0.04316			150.6	1.02643	0.388888	0.108253	-0.02132				150.6	1.06967	0.387481	0.097492	-0.03227
								150.8	0.776847	0.259699	0.032493	-0.04293			150.8	1.02738	0.389438	0.108384	-0.02142				150.8	1.07048	0.387552	0.098054	-0.03251
								151	0.777655	0.260407	0.032776	-0.043			151	1.02831	0.389669	0.109049	-0.02213				151	1.07144	0.388675	0.098382	-0.03253
								151.2	0.778276	0.261036	0.033024	-0.04286			151.2	1.02942	0.39065	0.109143	-0.02226				151.2	1.07217	0.389373	0.098318	-0.03252
								151.4	0.778975	0.261365	0.033032	-0.04281			151.4	1.0303	0.391164	0.109034	-0.0227				151.4	1.07338	0.390006	0.09874	-0.03211
								151.6	0.779683	0.261251	0.033371	-0.04222			151.6	1.03076	0.391851	0.108998	-0.02307				151.6	1.07423	0.390194	0.098799	-0.03218
								151.8	0.780666	0.261735	0.03332	-0.04248			151.8	1.03187	0.39249	0.108916	-0.02283				151.8	1.07502	0.390833	0.099117	-0.03201
								152	0.781211	0.262121	0.033561	-0.04243			152	1.03274	0.392952	0.109287	-0.02275				152	1.07633	0.390779	0.099504	-0.03155
								152.2	0.781476	0.262668	0.033385	-0.04243			152.2	1.03369	0.39364	0.109273	-0.02271				152.2	1.07726	0.391306	0.099497	-0.03137
								152.4	0.781457	0.263014	0.032893	-0.04233			152.4	1.03471	0.394404	0.109511	-0.02273				152.4	1.07828	0.391761	0.099074	-0.03115
								152.6	0.781902	0.263024	0.033192	-0.04232			152.6	1.03573	0.394707	0.109638	-0.0228				152.6	1.0793	0.392474	0.099095	-0.03069
								152.8	0.78261	0.262966	0.033475	-0.04216			152.8	1.03639	0.395116	0.110261	-0.02281				152.8	1.08068	0.392546	0.099539	-0.03063
								153	0.783157	0.263538	0.033645	-0.04225			153	1.03709	0.395502	0.110336	-0.02278				153	1.0816	0.392933	0.100362	-0.03071
								153.2	0.783952	0.263903	0.03337	-0.04258			153.2	1.03818	0.396257	0.110377	-0.02216				153.2	1.08265	0.39369	0.100403	-0.03027
								153.4	0.784639	0.264306	0.033563	-0.04236			153.4	1.03938	0.396753	0.110954	-0.02226				153.4	1.08387	0.394048	0.100724	-0.02975
								153.6	0.785085	0.26441	0.033952	-0.04241			153.6	1.04042	0.397275	0.110725	-0.02258				153.6	1.0847	0.394663	0.101284	-0.03005
								153.8	0.785588	0.264225	0.033633	-0.04289			153.8	1.0412	0.397568	0.110524	-0.02199				153.8	1.0853	0.395405	0.101487	-0.03018
								154	0.786214	0.264648	0.033488	-0.04348			154	1.04205	0.398017	0.110118	-0.02212				154	1.08549	0.396604	0.101993	-0.03011
								154.2	0.786682	0.264831	0.033562	-0.04412			154.2	1.04306	0.398574	0.110142	-0.0221				154.2	1.0863	0.397067	0.102443	-0.03042
								154.4	0.787434	0.26532	0.03349	-0.04397			154.4	1.04392	0.399201	0.110093	-0.02197				154.4	1.08706	0.397493	0.103056	-0.03054
								154.6	0.788275	0.265637	0.033545	-0.04397			154.6	1.04458	0.399718	0.109846	-0.02171				154.6	1.08796	0.397725	0.1034	-0.03088
								154.8	0.78915	0.265898	0.033611	-0.04409			154.8	1.04574	0.40029	0.109843	-0.02172				154.8	1.08848	0.397811	0.103607	-0.03142
								155	0.789943	0.266157	0.033724	-0.04418			155	1.04647	0.400766	0.110461	-0.02163				155	1.08949	0.398871	0.103547	-0.03206
								155.2	0.79093	0.266749	0.034026	-0.04383			155.2	1.04753	0.401166	0.110612	-0.02136				155.2	1.09034	0.399236	0.102956	-0.03237
								155.4	0.792081	0.267228	0.034227	-0.04339			155.4	1.04829	0.401703	0.111069	-0.02153				155.4	1.09101	0.399651	0.102681	-0.03256
								155.6	0.792883	0.266984	0.034246	-0.0428			155.6	1.04898	0.402345	0.111308	-0.02118				155.6	1.09149	0.399709	0.102199	-0.03278
								155.8	0.793676	0.267313	0.034534	-0.04323			155.8	1.05024	0.402247	0.111699	-0.02108				155.8	1.09267	0.400137	0.102135	-0.03267
								156	0.794098	0.267607	0.034593	-0.04341			156	1.05102	0.402773	0.11184	-0.02075				156	1.09372	0.400323	0.102237	-0.03266
								156.2	0.794455	0.267939	0.034554	-0.04324			156.2	1.05202	0.403369	0.111975	-0.02106				156.2	1.09433	0.400993	0.102434	-0.03252
								156.4	0.795178	0.267775	0.034883	-0.04322			156.4	1.05248	0.403536	0.112757	-0.02064				156.4	1.09578	0.40127	0.102504	-0.03252
								156.6	0.79609	0.268222	0.035422	-0.04341			156.6	1.053	0.403433	0.11322	-0.02047				156.6	1.09719	0.401725	0.102858	-0.0324
								156.8	0.797326	0.268655	0.035416	-0.04372			156.8	1.05359	0.404077	0.113449	-0.0199				156.8	1.09867	0.402107	0.102736	-0.03227
								157	0.798379	0.268849	0.035648	-0.0437			157	1.05424	0.404347	0.113674	-0.01944				157	1.09962	0.403171	0.102588	-0.03199
								157.2	0.799163	0.268801	0.036101	-0.04353			157.2	1.05512	0.404971	0.114006	-0.01931				157.2	1.10116	0.40385	0.102833	-0.0318
								157.4	0.799566	0.268837	0.036129	-0.04318			157.4	1.05551	0.405499	0.114255	-0.01967				157.4	1.10168	0.404354	0.103037	-0.03111
								157.6	0.800126	0.269003	0.036434	-0.04322			157.6	1.05555	0.405824	0.113891	-0.01994				157.6	1.10242	0.405222	0.103517	-0.03122
								157.8	0.800775	0.269311	0.036499	-0.04341			157.8	1.05616	0.406213	0.114243	-0.01971				157.8	1.10272	0.40599	0.10399	-0.03102
								158	0.801527	0.269857	0.036962	-0.04331			158	1.05709	0.406542	0.114198	-0.01963				158	1.10329	0.406841	0.104347	-0.03066
								158.2	0.802141	0.270683	0.037221	-0.04299			158.2	1.05835	0.406998	0.114775	-0.0194				158.2	1.10368	0.407111	0.104848	-0.03042
								158.4	0.803049	0.271503	0.037462	-0.04303			158.4	1.05897	0.407448	0.115259	-0.01916				158.4	1.10422	0.407176	0.105359	-0.03031
								158.6	0.803349	0.271736	0.037723	-0.04342			158.6	1.05951	0.407904	0.115626	-0.01944				158.6	1.10497	0.407625	0.105092	-0.03071
								158.8	0.803828	0.272149	0.037608	-0.04348			158.8	1.06059	0.408583	0.11625	-0.01966				158.8	1.1055	0.408033	0.104936	-0.03121
								159	0.804418	0.272806	0.037611	-0.04334			159	1.06156	0.409296	0.117472	-0.01979				159	1.1064	0.408614	0.104873	-0.03174
								159.2	0.805026	0.273429	0.037413	-0.04308			159.2	1.06261	0.410229	0.117852	-0.01995				159.2	1.10703	0.408937	0.104911	-0.0319
								159.4	0.805379	0.274001	0.037003	-0.04325			159.4	1.06363	0.411172	0.118277	-0.02026				159.4	1.10752	0.409517	0.105239	-0.03197
								159.6	0.805578	0.274276	0.036872	-0.04292			159.6	1.06489	0.411395	0.118274	-0.02015				159.6	1.10832	0.409883	0.105826	-0.032
								159.8	0.80605	0.275063	0.036538	-0.04328			159.8	1.06596	0.411698	0.118234	-0.02021				159.8	1.10954	0.410392	0.106302	-0.032
								160	0.806608	0.275824	0.036156	-0.04351			160	1.06713	0.41268	0.118198	-0.02032				160	1.11042	0.410924	0.1071	-0.03219
								160.2	0.80708	0.276241	0.036164	-0.04315			160.2	1.06863	0.41299	0.118688	-0.0204				160.2	1.11129	0.411284	0.107571	-0.03174
								160.4	0.807642	0.276836	0.03596	-0.04316			160.4	1.06932	0.413349	0.118692	-0.02015				160.4	1.11279	0.411951	0.107731	-0.03162
								160.6	0.808324	0.277358	0.035977	-0.04328			160.6	1.07047	0.413819	0.118817	-0.02007				160.6	1.11414	0.412652	0.108028	-0.03115
								160.8	0.809409	0.277894	0.03606	-0.04306			160.8	1.07105	0.414585	0.118696	-0.01987				160.8	1.11551	0.413652	0.108092	-0.03104
								161	0.809831	0.277748	0.036637	-0.04333			161	1.07204	0.415113	0.118755	-0.01977				161	1.11692	0.414511	0.108717	-0.03091
								161.2	0.8103	0.278147	0.036803	-0.04338			161.2	1.07265	0.416143	0.118802	-0.02013				161.2	1.11794	0.414384	0.109818	-0.03059
								161.4	0.811287	0.278027	0.036707	-0.04365			161.4	1.07312	0.416607	0.118562	-0.02003				161.4	1.11892	0.415134	0.109923	-0.02984
								161.6	0.812164	0.277987	0.037652	-0.04317			161.6	1.07343	0.417157	0.1185	-0.01996				161.6	1.12024	0.415698	0.110362	-0.02997
								161.8	0.812769	0.278216	0.037545	-0.04312			161.8	1.0744	0.41763	0.118743	-0.02013				161.8	1.12081	0.416219	0.110779	-0.02984
								162	0.814028	0.278379	0.0375	-0.043			162	1.07513	0.417983	0.118523	-0.02026				162	1.12197	0.417016	0.111571	-0.02961
								162.2	0.81488	0.278431	0.037226	-0.04255			162.2	1.07565	0.418742	0.118661	-0.02034				162.2	1.12249	0.417196	0.111838	-0.02951
								162.4	0.815827	0.278863	0.037289	-0.04285			162.4	1.07606	0.419035	0.119002	-0.02099				162.4	1.12329	0.417528	0.111995	-0.03017
								162.6	0.816325	0.279231	0.037644	-0.0426			162.6	1.07684	0.4196	0.119382	-0.02096				162.6	1.12437	0.417939	0.111896	-0.03045
								162.8	0.817027	0.279705	0.037259	-0.04208			162.8	1.0778	0.420476	0.119837	-0.0205				162.8	1.12492	0.418521	0.112163	-0.03082
								163	0.817804	0.280079	0.037077	-0.04165			163	1.07886	0.420796	0.120103	-0.02041				163	1.12582	0.418808	0.112766	-0.03109
								163.2	0.818092	0.27993	0.036666	-0.04118			163.2	1.07934	0.421301	0.119778	-0.02013				163.2	1.12672	0.41894	0.1131	-0.03075
								163.4	0.818774	0.280649	0.036643	-0.04076			163.4	1.08021	0.421347	0.119698	-0.02004				163.4	1.12769	0.419403	0.112835	-0.03103
								163.6	0.819547	0.281264	0.037244	-0.04014			163.6	1.0812	0.421364	0.119313	-0.01934				163.6	1.12866	0.41982	0.113456	-0.03064
								163.8	0.820441	0.281607	0.037127	-0.04009			163.8	1.08198	0.42171	0.119324	-0.0194				163.8	1.13011	0.419793	0.113471	-0.03033
								164	0.820857	0.282367	0.037904	-0.04006			164	1.08319	0.4221	0.119439	-0.01948				164	1.13083	0.420182	0.11368	-0.03034
								164.2	0.821158	0.283024	0.038309	-0.03961			164.2	1.08409	0.422166	0.119827	-0.01906				164.2	1.13138	0.420641	0.113515	-0.03001
								164.4	0.822107	0.283549	0.039031	-0.03963			164.4	1.08445	0.421938	0.119549	-0.01897				164.4	1.13225	0.421333	0.114132	-0.03014
								164.6	0.822893	0.283667	0.039584	-0.04006			164.6	1.08483	0.422216	0.119704	-0.01866				164.6	1.13259	0.422182	0.114509	-0.02983
								164.8	0.823497	0.284188	0.039814	-0.04069			164.8	1.08552	0.422596	0.120194	-0.01879				164.8	1.1338	0.422825	0.114609	-0.02993
								165	0.823772	0.284211	0.040503	-0.04145			165	1.08609	0.423087	0.120632	-0.01852				165	1.13432	0.423061	0.114759	-0.03001
								165.2	0.824204	0.284571	0.040785	-0.04212			165.2	1.08651	0.423532	0.120853	-0.01861				165.2	1.13515	0.423042	0.114936	-0.03029
								165.4	0.825024	0.284074	0.041086	-0.04247			165.4	1.08702	0.423958	0.121215	-0.01857				165.4	1.13613	0.423812	0.114624	-0.03022
								165.6	0.825431	0.284404	0.041585	-0.04279			165.6	1.08778	0.424464	0.121652	-0.01813				165.6	1.13655	0.424459	0.11473	-0.03049
								165.8	0.82625	0.284645	0.041067	-0.04316			165.8	1.08855	0.424805	0.121945	-0.01859				165.8	1.13737	0.424952	0.114697	-0.03056
								166	0.826946	0.284821	0.040778	-0.04288			166	1.08925	0.42521	0.122356	-0.0185				166	1.13823	0.425535	0.114916	-0.0302
								166.2	0.827288	0.285006	0.040909	-0.04302			166.2	1.08972	0.425516	0.122781	-0.01852				166.2	1.13889	0.426269	0.114292	-0.03015
								166.4	0.828163	0.285811	0.041213	-0.04325			166.4	1.09082	0.425865	0.123471	-0.01843				166.4	1.13945	0.426841	0.114238	-0.03015
								166.6	0.828693	0.28596	0.0415	-0.04343			166.6	1.09185	0.426656	0.123379	-0.01784				166.6	1.14015	0.427131	0.11436	-0.02983
								166.8	0.829278	0.286161	0.041342	-0.04316			166.8	1.09303	0.427368	0.123448	-0.0176				166.8	1.14065	0.42766	0.114241	-0.03032
								167	0.830051	0.286315	0.040935	-0.04296			167	1.094	0.427684	0.123622	-0.01748				167	1.14152	0.427702	0.114368	-0.03008
								167.2	0.831002	0.287091	0.040616	-0.04281			167.2	1.09414	0.428517	0.123732	-0.01732				167.2	1.1425	0.427407	0.114043	-0.03023
								167.4	0.831641	0.28781	0.040704	-0.04306			167.4	1.09454	0.428997	0.12379	-0.01721				167.4	1.14357	0.428276	0.113906	-0.03011
								167.6	0.83228	0.28855	0.040925	-0.04309			167.6	1.09556	0.429382	0.123785	-0.01709				167.6	1.14451	0.428835	0.114178	-0.02962
								167.8	0.832995	0.289203	0.040823	-0.0433			167.8	1.09674	0.429844	0.124287	-0.01765				167.8	1.14583	0.428952	0.113986	-0.02973
								168	0.833381	0.290309	0.040977	-0.04306			168	1.09745	0.430741	0.12461	-0.01774				168	1.14621	0.429425	0.114174	-0.02981
								168.2	0.834381	0.290595	0.041271	-0.04288			168.2	1.09813	0.431255	0.124779	-0.01794				168.2	1.14655	0.430273	0.114398	-0.02928
								168.4	0.8356	0.290673	0.041183	-0.04278			168.4	1.09839	0.431691	0.124418	-0.01804				168.4	1.14764	0.43048	0.115006	-0.02962
								168.6	0.836014	0.291229	0.041063	-0.04309			168.6	1.0996	0.432947	0.124622	-0.01833				168.6	1.1484	0.431107	0.114796	-0.02965
								168.8	0.836528	0.291784	0.041102	-0.04294			168.8	1.10065	0.433435	0.125364	-0.0185				168.8	1.14971	0.430902	0.114887	-0.02942
								169	0.836835	0.292227	0.041439	-0.04306			169	1.10105	0.434387	0.125525	-0.01828				169	1.15003	0.430999	0.115242	-0.02949
								169.2	0.837241	0.292688	0.041452	-0.04291			169.2	1.10194	0.43494	0.125755	-0.01816				169.2	1.15106	0.431018	0.115191	-0.0295
								169.4	0.838139	0.292899	0.041557	-0.04271			169.4	1.10301	0.435409	0.12631	-0.01789				169.4	1.15194	0.43144	0.115275	-0.0292
								169.6	0.838566	0.293276	0.041704	-0.04271			169.6	1.10414	0.435707	0.126398	-0.01743				169.6	1.15273	0.432542	0.115607	-0.0293
								169.8	0.839443	0.292993	0.041811	-0.04248			169.8	1.105	0.435843	0.126841	-0.01775				169.8	1.154	0.432797	0.11577	-0.02901
								170	0.839847	0.293046	0.042198	-0.04219			170	1.10583	0.436263	0.127086	-0.01758				170	1.15469	0.433676	0.115798	-0.0281
								170.2	0.840785	0.292764	0.042742	-0.04237			170.2	1.10671	0.436497	0.126897	-0.01766				170.2	1.15552	0.433919	0.115873	-0.0278
								170.4	0.841526	0.292962	0.043156	-0.0424			170.4	1.10787	0.437379	0.127116	-0.01728				170.4	1.15581	0.434371	0.116425	-0.0274
								170.6	0.842048	0.293004	0.04362	-0.04231			170.6	1.10848	0.437615	0.127323	-0.01728				170.6	1.15636	0.434627	0.116663	-0.0276
								170.8	0.842855	0.293105	0.043591	-0.04208			170.8	1.10882	0.437856	0.127893	-0.01717				170.8	1.1574	0.435361	0.116783	-0.02819
								171	0.843701	0.293481	0.043169	-0.0422			171	1.10901	0.438123	0.128252	-0.01713				171	1.15829	0.435569	0.117234	-0.02789
								171.2	0.844412	0.294514	0.043298	-0.04242			171.2	1.1094	0.438111	0.12844	-0.01693				171.2	1.15897	0.43618	0.117241	-0.02797
								171.4	0.84481	0.29481	0.043448	-0.04266			171.4	1.11016	0.43835	0.128505	-0.01704				171.4	1.15992	0.437364	0.117383	-0.02761
								171.6	0.845981	0.295212	0.043461	-0.0423			171.6	1.11113	0.4384	0.128936	-0.01697				171.6	1.16084	0.438171	0.11748	-0.02776
								171.8	0.846502	0.295473	0.043581	-0.04237			171.8	1.11216	0.439105	0.129276	-0.01695				171.8	1.16155	0.438509	0.117921	-0.0273
								172	0.847621	0.295892	0.043264	-0.04235			172	1.11252	0.439991	0.129205	-0.01691				172	1.16193	0.438954	0.118271	-0.02724
								172.2	0.848476	0.295948	0.043576	-0.04237			172.2	1.11342	0.440602	0.128951	-0.01679				172.2	1.16246	0.43952	0.118414	-0.02721
								172.4	0.849	0.296337	0.043218	-0.04223			172.4	1.11421	0.440902	0.129438	-0.01655				172.4	1.16351	0.439757	0.118605	-0.02778
								172.6	0.849438	0.296768	0.043351	-0.04235			172.6	1.11533	0.441061	0.129563	-0.01625				172.6	1.16397	0.440422	0.11855	-0.02761
								172.8	0.850207	0.297398	0.043576	-0.04233			172.8	1.11592	0.441271	0.129545	-0.01616				172.8	1.1644	0.440804	0.11894	-0.02758
								173	0.850993	0.297831	0.04365	-0.04268			173	1.11651	0.4419	0.129409	-0.01572				173	1.16504	0.441632	0.118757	-0.02804
								173.2	0.852006	0.298399	0.043827	-0.04266			173.2	1.11747	0.442346	0.129323	-0.01587				173.2	1.16554	0.442176	0.118755	-0.02797
								173.4	0.852525	0.298452	0.043843	-0.04312			173.4	1.11849	0.443017	0.129196	-0.01587				173.4	1.16683	0.442909	0.119124	-0.02821
								173.6	0.853194	0.298434	0.04391	-0.04287			173.6	1.11916	0.443684	0.128757	-0.01564				173.6	1.16784	0.444061	0.119369	-0.02825
								173.8	0.853835	0.29874	0.044159	-0.04288			173.8	1.12001	0.444179	0.1287	-0.01566				173.8	1.16855	0.444285	0.119592	-0.02826
								174	0.85442	0.299079	0.044384	-0.04269			174	1.12061	0.444852	0.128725	-0.01585				174	1.16925	0.444325	0.119679	-0.02845
								174.2	0.854985	0.299378	0.044363	-0.04295			174.2	1.12153	0.445391	0.1284	-0.01578				174.2	1.16989	0.444389	0.119936	-0.0286
								174.4	0.855213	0.300037	0.044471	-0.04283			174.4	1.12215	0.445991	0.129164	-0.01586				174.4	1.17047	0.444612	0.120134	-0.02877
								174.6	0.8559	0.300569	0.044536	-0.04283			174.6	1.12272	0.446055	0.129481	-0.01596				174.6	1.17163	0.445021	0.119902	-0.02892
								174.8	0.856428	0.300772	0.044292	-0.04319			174.8	1.12322	0.446397	0.129414	-0.01638				174.8	1.17295	0.445532	0.120255	-0.02887
								175	0.856949	0.301718	0.044082	-0.04291			175	1.12383	0.44662	0.129573	-0.01633				175	1.17388	0.44601	0.120673	-0.02859
								175.2	0.857321	0.302797	0.043897	-0.04311			175.2	1.12481	0.446724	0.129743	-0.01621				175.2	1.17475	0.4463	0.120805	-0.02846
								175.4	0.858092	0.303055	0.044305	-0.04328			175.4	1.12559	0.447354	0.130036	-0.0166				175.4	1.176	0.446782	0.121025	-0.02818
								175.6	0.858628	0.303197	0.044686	-0.04335			175.6	1.12591	0.447768	0.130359	-0.01622				175.6	1.17673	0.447379	0.121621	-0.02811
								175.8	0.859027	0.303982	0.044728	-0.04373			175.8	1.12642	0.448623	0.130626	-0.01631				175.8	1.17722	0.447597	0.121797	-0.0275
								176	0.859814	0.304602	0.044657	-0.0438			176	1.12711	0.448836	0.130981	-0.01612				176	1.17845	0.447761	0.121878	-0.02774
								176.2	0.85991	0.305038	0.045184	-0.04361			176.2	1.12786	0.448956	0.131678	-0.01561				176.2	1.17942	0.448165	0.121893	-0.02772
								176.4	0.860729	0.305268	0.045278	-0.04373			176.4	1.12869	0.44912	0.13231	-0.01547				176.4	1.18084	0.448753	0.121928	-0.02741
								176.6	0.861511	0.30532	0.045338	-0.04399			176.6	1.12937	0.449378	0.131948	-0.01529				176.6	1.18187	0.448959	0.122014	-0.02689
								176.8	0.862438	0.30574	0.045498	-0.04362			176.8	1.13009	0.449818	0.1321	-0.0157				176.8	1.18284	0.449436	0.122389	-0.02698
								177	0.863305	0.305944	0.045793	-0.04359			177	1.13053	0.450622	0.132381	-0.01528				177	1.18391	0.450234	0.122222	-0.02666
								177.2	0.863969	0.305659	0.046126	-0.0435			177.2	1.13127	0.451172	0.132302	-0.01537				177.2	1.18488	0.450614	0.122561	-0.02669
								177.4	0.864145	0.305907	0.04633	-0.04363			177.4	1.13189	0.451926	0.132018	-0.01563				177.4	1.18649	0.451108	0.122867	-0.02686
								177.6	0.864811	0.306143	0.04671	-0.04358			177.6	1.13212	0.452788	0.131815	-0.01527				177.6	1.18724	0.451777	0.123228	-0.02673
								177.8	0.865156	0.306439	0.046892	-0.04381			177.8	1.13281	0.453501	0.132263	-0.01542				177.8	1.18801	0.451956	0.123414	-0.02673
								178	0.865728	0.306698	0.046924	-0.04388			178	1.1335	0.45374	0.132688	-0.01561				178	1.18862	0.45201	0.12307	-0.02696
								178.2	0.865987	0.306998	0.04743	-0.04411			178.2	1.13439	0.454539	0.133187	-0.01566				178.2	1.18934	0.452809	0.123031	-0.02676
								178.4	0.866504	0.30738	0.04723	-0.04398			178.4	1.13505	0.455173	0.1338	-0.01596				178.4	1.18999	0.453377	0.123438	-0.02663
								178.6	0.867068	0.307337	0.047145	-0.04392			178.6	1.1359	0.45545	0.133635	-0.0159				178.6	1.19075	0.454144	0.123795	-0.02655
								178.8	0.867174	0.30762	0.046905	-0.0437			178.8	1.13638	0.455971	0.133936	-0.01591				178.8	1.19163	0.454617	0.124228	-0.02674
								179	0.867771	0.307978	0.046755	-0.04342			179	1.13673	0.456176	0.134331	-0.01577				179	1.19179	0.455596	0.124665	-0.02661
								179.2	0.868053	0.308288	0.046931	-0.04383			179.2	1.13735	0.456722	0.13463	-0.01556				179.2	1.19218	0.455691	0.125084	-0.02663
								179.4	0.868768	0.308436	0.047016	-0.04396			179.4	1.13764	0.457359	0.134921	-0.01577				179.4	1.19189	0.45637	0.125195	-0.02669
								179.6	0.868997	0.308895	0.047553	-0.04412			179.6	1.13781	0.458171	0.135002	-0.01523				179.6	1.19202	0.457009	0.125725	-0.02686
								179.8	0.869508	0.309197	0.047956	-0.04383			179.8	1.1384	0.458905	0.135368	-0.01513				179.8	1.19284	0.457454	0.125464	-0.02717
								180	0.870149	0.309441	0.04789	-0.04352			180	1.13953	0.459153	0.135759	-0.01461				180	1.19342	0.458182	0.125891	-0.02696
								180.2	0.870588	0.309482	0.048015	-0.04306			180.2	1.14027	0.459584	0.136252	-0.0143				180.2	1.19411	0.458791	0.126179	-0.02691
								180.4	0.871671	0.309589	0.047872	-0.04265			180.4	1.14086	0.460265	0.136398	-0.01412				180.4	1.19494	0.45923	0.126588	-0.02635
								180.6	0.872414	0.309652	0.047942	-0.04205			180.6	1.14118	0.460626	0.136342	-0.01381				180.6	1.19527	0.459292	0.126887	-0.02623
								180.8	0.873165	0.309996	0.047748	-0.04152			180.8	1.14182	0.461125	0.136846	-0.01381				180.8	1.19523	0.460092	0.127134	-0.02632
								181	0.873699	0.310549	0.048156	-0.04163			181	1.14245	0.461639	0.137052	-0.01332				181	1.19609	0.460511	0.127322	-0.02627
								181.2	0.873944	0.310815	0.048161	-0.04207			181.2	1.14342	0.461953	0.137366	-0.01343				181.2	1.19712	0.460569	0.127925	-0.02662
								181.4	0.874261	0.311794	0.048497	-0.04231			181.4	1.14403	0.462887	0.138215	-0.01379				181.4	1.19807	0.460462	0.128862	-0.02613
								181.6	0.875021	0.312497	0.048515	-0.04263			181.6	1.14504	0.463365	0.138723	-0.01358				181.6	1.19939	0.460333	0.129368	-0.02623
								181.8	0.875456	0.313128	0.048626	-0.04258			181.8	1.1462	0.463749	0.139472	-0.01383				181.8	1.20035	0.460542	0.129353	-0.02629
								182	0.876489	0.313433	0.048665	-0.04246			182	1.14754	0.463638	0.140217	-0.01415				182	1.20093	0.460853	0.129342	-0.02638
								182.2	0.877256	0.313793	0.048757	-0.04246			182.2	1.14863	0.464171	0.140688	-0.01457				182.2	1.20213	0.461319	0.129697	-0.02623
								182.4	0.878115	0.313785	0.048157	-0.04239			182.4	1.14986	0.464137	0.14021	-0.01462				182.4	1.20271	0.462215	0.129742	-0.02651
								182.6	0.878978	0.314084	0.048109	-0.0425			182.6	1.15088	0.464463	0.140613	-0.01456				182.6	1.20403	0.462448	0.129842	-0.02634
								182.8	0.879921	0.314493	0.048362	-0.04298			182.8	1.15138	0.464504	0.14095	-0.01469				182.8	1.20513	0.462973	0.130146	-0.02623
								183	0.881165	0.314645	0.0483	-0.04308			183	1.15203	0.464578	0.140779	-0.01496				183	1.20545	0.463432	0.130185	-0.02622
								183.2	0.881856	0.314909	0.048454	-0.04311			183.2	1.15275	0.465028	0.14082	-0.01491				183.2	1.20608	0.464071	0.130744	-0.02644
								183.4	0.882947	0.315262	0.048575	-0.04337			183.4	1.15307	0.465543	0.140752	-0.01501				183.4	1.20637	0.464668	0.130782	-0.02634
								183.6	0.883824	0.315325	0.049854	-0.04324			183.6	1.15356	0.46615	0.140799	-0.01462				183.6	1.20719	0.46581	0.131256	-0.02647
								183.8	0.8847	0.315486	0.050029	-0.04297			183.8	1.15392	0.466477	0.140969	-0.01466				183.8	1.2082	0.466683	0.131259	-0.02652
								184	0.885356	0.316188	0.049493	-0.04267			184	1.15439	0.467024	0.140557	-0.01445				184	1.20873	0.467481	0.1316	-0.02626
								184.2	0.885611	0.316366	0.049816	-0.04233			184.2	1.15489	0.467468	0.140565	-0.01457				184.2	1.20985	0.46787	0.131474	-0.02649
								184.4	0.886283	0.316742	0.049367	-0.04217			184.4	1.15564	0.46798	0.140184	-0.01387				184.4	1.21043	0.468307	0.131425	-0.02636
								184.6	0.886358	0.316772	0.049222	-0.04222			184.6	1.15617	0.46859	0.140161	-0.01358				184.6	1.21093	0.468367	0.131235	-0.02625
								184.8	0.886551	0.317424	0.049319	-0.04251			184.8	1.15662	0.469077	0.140576	-0.01327				184.8	1.21127	0.468748	0.131365	-0.02637
								185	0.887016	0.317758	0.049595	-0.0425			185	1.1573	0.469711	0.14067	-0.01308				185	1.21211	0.468862	0.131845	-0.02637
								185.2	0.887412	0.31821	0.049701	-0.04269			185.2	1.15781	0.470639	0.140974	-0.01317				185.2	1.2128	0.469316	0.131905	-0.02689
								185.4	0.887818	0.318686	0.049983	-0.04226			185.4	1.15818	0.471124	0.141432	-0.01342				185.4	1.21356	0.468941	0.132228	-0.02712
								185.6	0.888077	0.319118	0.049714	-0.04228			185.6	1.15877	0.471383	0.141101	-0.01331				185.6	1.2146	0.469515	0.132041	-0.02724
								185.8	0.88824	0.318981	0.049997	-0.04205			185.8	1.15959	0.471959	0.141501	-0.0135				185.8	1.2146	0.470254	0.131585	-0.02674
								186	0.88876	0.318908	0.050291	-0.04229			186	1.16082	0.472195	0.141619	-0.01385				186	1.21527	0.470515	0.131422	-0.02687
								186.2	0.888892	0.319432	0.050334	-0.04243			186.2	1.16131	0.472316	0.141662	-0.01402				186.2	1.21602	0.471189	0.131266	-0.02693
								186.4	0.889658	0.319458	0.049967	-0.04256			186.4	1.16259	0.472867	0.141923	-0.0139				186.4	1.2169	0.47226	0.131015	-0.02681
								186.6	0.890513	0.319763	0.05046	-0.0428			186.6	1.16292	0.473385	0.142774	-0.01411				186.6	1.21785	0.472183	0.131329	-0.02597
								186.8	0.89138	0.320079	0.050387	-0.04262			186.8	1.16345	0.473852	0.142947	-0.01425				186.8	1.21867	0.473214	0.131443	-0.02566
								187	0.89224	0.320209	0.050153	-0.04246			187	1.16421	0.474436	0.143288	-0.01421				187	1.21965	0.474219	0.13128	-0.02531
								187.2	0.892873	0.320602	0.050304	-0.04207			187.2	1.16487	0.475001	0.143786	-0.01422				187.2	1.22049	0.475567	0.131597	-0.02474
								187.4	0.893648	0.321268	0.050391	-0.0421			187.4	1.16533	0.475606	0.144431	-0.01418				187.4	1.22124	0.476322	0.13146	-0.02489
								187.6	0.89428	0.321806	0.050431	-0.04181			187.6	1.16649	0.476209	0.144873	-0.01388				187.6	1.22256	0.477104	0.131695	-0.02514
								187.8	0.894808	0.322673	0.050025	-0.04179			187.8	1.16721	0.476856	0.144878	-0.01405				187.8	1.22402	0.477327	0.131829	-0.02498
								188	0.895442	0.323386	0.049844	-0.04156			188	1.16804	0.477524	0.144839	-0.01369				188	1.22531	0.477464	0.132353	-0.0253
								188.2	0.896143	0.323541	0.049848	-0.04161			188.2	1.16917	0.478001	0.145201	-0.01389				188.2	1.22644	0.478266	0.132413	-0.02508
								188.4	0.897056	0.323844	0.049558	-0.04143			188.4	1.1702	0.478365	0.14522	-0.0131				188.4	1.22728	0.478161	0.132702	-0.02478
								188.6	0.897916	0.324015	0.050504	-0.04171			188.6	1.17082	0.478831	0.145312	-0.01323				188.6	1.22797	0.47786	0.132642	-0.02498
								188.8	0.899302	0.324569	0.051429	-0.04184			188.8	1.17126	0.479497	0.145201	-0.01326				188.8	1.2285	0.478107	0.133022	-0.02554
								189	0.900106	0.324318	0.051667	-0.04152			189	1.172	0.479953	0.145051	-0.01349				189	1.22869	0.478751	0.133171	-0.02557
								189.2	0.900322	0.324838	0.051701	-0.04123			189.2	1.17202	0.479838	0.144991	-0.01332				189.2	1.22966	0.479244	0.133297	-0.02618
								189.4	0.900926	0.324988	0.051588	-0.041			189.4	1.17259	0.479869	0.145183	-0.01328				189.4	1.23028	0.479187	0.133664	-0.02615
								189.6	0.901388	0.325223	0.051931	-0.04094			189.6	1.17321	0.479739	0.145075	-0.01298				189.6	1.23057	0.479474	0.134145	-0.02584
								189.8	0.902185	0.325299	0.052558	-0.04098			189.8	1.1744	0.479878	0.145389	-0.01264				189.8	1.23102	0.479887	0.134322	-0.02588
								190	0.902455	0.325709	0.052743	-0.04121			190	1.17559	0.48027	0.145444	-0.01232				190	1.23185	0.480035	0.134626	-0.0261
								190.2	0.903258	0.325895	0.052706	-0.041			190.2	1.17635	0.479635	0.145933	-0.01238				190.2	1.23226	0.480499	0.134761	-0.02542
								190.4	0.904107	0.326034	0.052877	-0.04108			190.4	1.17736	0.480175	0.146209	-0.01253				190.4	1.23273	0.480539	0.135019	-0.02471
								190.6	0.904601	0.325905	0.053037	-0.0415			190.6	1.17793	0.480428	0.146622	-0.01297				190.6	1.23332	0.480836	0.135536	-0.02457
								190.8	0.904879	0.326638	0.052718	-0.04151			190.8	1.17921	0.480948	0.147037	-0.01263				190.8	1.2344	0.482352	0.135726	-0.02438
								191	0.905201	0.326778	0.052476	-0.04168			191	1.18013	0.480991	0.147565	-0.01236				191	1.23522	0.483318	0.136059	-0.02428
								191.2	0.905334	0.327314	0.052297	-0.0411			191.2	1.18123	0.481292	0.148051	-0.01231				191.2	1.23571	0.483885	0.135965	-0.02464
								191.4	0.9056	0.327967	0.052187	-0.04121			191.4	1.18233	0.48177	0.148706	-0.01225				191.4	1.23668	0.48458	0.136163	-0.02489
								191.6	0.905963	0.32858	0.051516	-0.0418			191.6	1.1831	0.482447	0.149038	-0.0119				191.6	1.23778	0.484761	0.13596	-0.02449
								191.8	0.90648	0.328891	0.051474	-0.04191			191.8	1.1833	0.483268	0.149067	-0.01215				191.8	1.23859	0.485268	0.135951	-0.02443
								192	0.906981	0.329275	0.051378	-0.0419			192	1.18398	0.483532	0.149606	-0.01211				192	1.23974	0.485964	0.135914	-0.02478
								192.2	0.907146	0.329834	0.051268	-0.04173			192.2	1.18495	0.484282	0.149498	-0.01261				192.2	1.24071	0.486306	0.135723	-0.02437
								192.4	0.907721	0.330225	0.051143	-0.04193			192.4	1.18562	0.484909	0.14929	-0.01216				192.4	1.24162	0.486123	0.135816	-0.02491
								192.6	0.908117	0.330312	0.051319	-0.0422			192.6	1.18567	0.485579	0.149204	-0.01207				192.6	1.24242	0.486557	0.13546	-0.02539
								192.8	0.908231	0.330708	0.051406	-0.04223			192.8	1.18554	0.486555	0.149562	-0.01172				192.8	1.243	0.487158	0.135857	-0.0251
								193	0.90833	0.33093	0.05105	-0.04175			193	1.18588	0.48704	0.149789	-0.01148				193	1.24352	0.487853	0.13589	-0.02519
								193.2	0.909034	0.331719	0.05126	-0.04183			193.2	1.18603	0.487541	0.149816	-0.01107				193.2	1.24463	0.488471	0.136168	-0.0256
								193.4	0.909938	0.331799	0.051489	-0.04182			193.4	1.18649	0.488545	0.150106	-0.01099				193.4	1.24485	0.488632	0.136339	-0.02527
								193.6	0.910531	0.332273	0.052027	-0.0417			193.6	1.18685	0.488997	0.150329	-0.01076				193.6	1.24517	0.488914	0.136756	-0.0252
								193.8	0.911282	0.332589	0.053007	-0.04189			193.8	1.18742	0.489705	0.150447	-0.01031				193.8	1.24564	0.48953	0.136762	-0.02444
								194	0.91215	0.332644	0.053386	-0.04184			194	1.18796	0.49048	0.150723	-0.01039				194	1.24612	0.489812	0.137491	-0.02388
								194.2	0.913128	0.332884	0.054234	-0.04204			194.2	1.18828	0.490639	0.150661	-0.01098				194.2	1.24714	0.490178	0.138542	-0.02349
								194.4	0.913562	0.332918	0.054461	-0.04226			194.4	1.18848	0.491573	0.15064	-0.0112				194.4	1.24753	0.4903	0.139262	-0.02334
								194.6	0.914126	0.332763	0.054393	-0.0424			194.6	1.18955	0.492195	0.150907	-0.01129				194.6	1.24824	0.491441	0.139698	-0.02365
								194.8	0.914861	0.333373	0.05427	-0.04238			194.8	1.19045	0.492363	0.151158	-0.01098				194.8	1.2488	0.492083	0.140184	-0.02353
								195	0.915927	0.333547	0.054015	-0.04208			195	1.19138	0.492598	0.15148	-0.01099				195	1.24931	0.492845	0.140747	-0.02344
								195.2	0.916562	0.333963	0.054515	-0.04193			195.2	1.19228	0.493024	0.151869	-0.01133				195.2	1.24973	0.492925	0.140334	-0.02334
								195.4	0.917485	0.334316	0.05465	-0.042			195.4	1.19315	0.493753	0.152394	-0.0119				195.4	1.25043	0.493499	0.140603	-0.02297
								195.6	0.918066	0.334499	0.054864	-0.04238			195.6	1.19342	0.493856	0.152631	-0.01213				195.6	1.25114	0.494227	0.140624	-0.02271
								195.8	0.918417	0.334948	0.05516	-0.04217			195.8	1.19425	0.494583	0.152535	-0.01221				195.8	1.25175	0.494848	0.140841	-0.02313
								196	0.918834	0.335769	0.055392	-0.04216			196	1.19526	0.494919	0.152829	-0.01229				196	1.25257	0.495118	0.140756	-0.02337
								196.2	0.919378	0.336339	0.055522	-0.0422			196.2	1.19605	0.495782	0.15282	-0.01213				196.2	1.25304	0.495369	0.140911	-0.0232
								196.4	0.919918	0.336213	0.055405	-0.04218			196.4	1.19648	0.496217	0.153058	-0.0116				196.4	1.25338	0.495838	0.140792	-0.02368
								196.6	0.91988	0.336635	0.05581	-0.0422			196.6	1.19677	0.496583	0.153362	-0.01118				196.6	1.25392	0.496093	0.140328	-0.02339
								196.8	0.919935	0.337258	0.055811	-0.04195			196.8	1.19758	0.496702	0.154176	-0.01126				196.8	1.25415	0.496714	0.140394	-0.02308
								197	0.920215	0.337586	0.056039	-0.04173			197	1.19828	0.497151	0.154248	-0.01168				197	1.25462	0.497336	0.140023	-0.02338
								197.2	0.921001	0.337891	0.056272	-0.04169			197.2	1.19874	0.497347	0.154725	-0.01151				197.2	1.25543	0.497729	0.139735	-0.02328
								197.4	0.9211	0.337968	0.056545	-0.04125			197.4	1.19946	0.497614	0.155062	-0.01117				197.4	1.25597	0.497981	0.139582	-0.02289
								197.6	0.921572	0.337991	0.057181	-0.04098			197.6	1.20014	0.49777	0.155431	-0.01075				197.6	1.25627	0.497939	0.139765	-0.02286
								197.8	0.922222	0.338069	0.05765	-0.04099			197.8	1.20055	0.497781	0.155292	-0.01021				197.8	1.25718	0.498305	0.140222	-0.02242
								198	0.922843	0.33818	0.057196	-0.04078			198	1.20126	0.498024	0.155387	-0.01042				198	1.25861	0.49911	0.140755	-0.02256
								198.2	0.922928	0.338093	0.057173	-0.04087			198.2	1.20196	0.498116	0.155209	-0.01054				198.2	1.26012	0.499182	0.141526	-0.02278
								198.4	0.923323	0.337309	0.056698	-0.041			198.4	1.2021	0.498394	0.155429	-0.00989				198.4	1.26015	0.499245	0.141264	-0.02288
								198.6	0.924423	0.337733	0.056617	-0.04107			198.6	1.20339	0.498749	0.155418	-0.00981				198.6	1.26133	0.500022	0.141521	-0.02291
								198.8	0.925151	0.338459	0.056614	-0.04104			198.8	1.20437	0.499072	0.15598	-0.00947				198.8	1.26197	0.500227	0.142333	-0.02265
								199	0.926318	0.33879	0.056873	-0.04109			199	1.20533	0.499775	0.156305	-0.0097				199	1.26297	0.5009	0.142281	-0.02272
								199.2	0.926782	0.339109	0.057615	-0.04127			199.2	1.2058	0.500053	0.156628	-0.0096				199.2	1.26366	0.501054	0.142315	-0.02269
								199.4	0.927849	0.339582	0.057931	-0.04109			199.4	1.20639	0.500345	0.156873	-0.00968				199.4	1.26452	0.50185	0.143046	-0.02291
								199.6	0.928329	0.340231	0.058627	-0.04131			199.6	1.20696	0.500717	0.156636	-0.0093				199.6	1.26497	0.502209	0.142948	-0.02287
								199.8	0.928814	0.341321	0.058641	-0.04175			199.8	1.20776	0.501641	0.156659	-0.00932				199.8	1.2656	0.502546	0.143115	-0.02286
								200	0.929569	0.341996	0.059187	-0.0419			200	1.20803	0.502115	0.156525	-0.00913				200	1.26613	0.503421	0.143371	-0.02259
								200.2	0.930378	0.342234	0.059341	-0.04196			200.2	1.20861	0.502662	0.156482	-0.00907				200.2	1.26671	0.503957	0.143494	-0.02252
								200.4	0.930881	0.342684	0.05942	-0.04174			200.4	1.20907	0.50304	0.156343	-0.00868				200.4	1.26683	0.50437	0.143615	-0.02238
								200.6	0.93097	0.343587	0.059723	-0.04191			200.6	1.20968	0.503697	0.156629	-0.00889				200.6	1.26765	0.504657	0.143981	-0.02239
								200.8	0.931506	0.344179	0.059635	-0.04157			200.8	1.2102	0.503444	0.15692	-0.00953				200.8	1.26828	0.505384	0.14433	-0.02232
								201	0.931929	0.344867	0.059579	-0.04122			201	1.21065	0.504338	0.156662	-0.00975				201	1.26898	0.505904	0.144049	-0.02252
								201.2	0.932759	0.345225	0.059244	-0.04093			201.2	1.21179	0.504815	0.1567	-0.00987				201.2	1.26979	0.506552	0.144209	-0.02247
								201.4	0.933052	0.345466	0.059366	-0.04061			201.4	1.21286	0.505281	0.156448	-0.01024				201.4	1.27051	0.506899	0.144797	-0.0224
								201.6	0.933662	0.345638	0.059053	-0.0405			201.6	1.21392	0.5058	0.156141	-0.01001				201.6	1.27098	0.507146	0.145265	-0.02256
								201.8	0.93416	0.345956	0.058499	-0.04084			201.8	1.2144	0.506246	0.155806	-0.01046				201.8	1.27197	0.50775	0.145699	-0.0228
								202	0.934403	0.346279	0.057926	-0.04101			202	1.21491	0.507015	0.15612	-0.01075				202	1.27253	0.50781	0.146103	-0.02314
								202.2	0.93501	0.346131	0.057388	-0.04118			202.2	1.21542	0.507699	0.156179	-0.01069				202.2	1.27352	0.507969	0.14639	-0.02359
								202.4	0.935877	0.346331	0.05708	-0.04119			202.4	1.21576	0.508409	0.15624	-0.01016				202.4	1.27397	0.508189	0.146499	-0.02357
								202.6	0.936749	0.347044	0.057032	-0.04097			202.6	1.21668	0.509087	0.156189	-0.01049				202.6	1.27494	0.508761	0.146817	-0.02331
								202.8	0.937455	0.347389	0.056787	-0.04137			202.8	1.21719	0.509423	0.156542	-0.01054				202.8	1.27542	0.509119	0.14706	-0.02308
								203	0.938358	0.347122	0.056346	-0.04193			203	1.21751	0.509783	0.156417	-0.01064				203	1.27601	0.509628	0.146746	-0.0233
								203.2	0.939053	0.34732	0.056324	-0.04164			203.2	1.21793	0.509816	0.156589	-0.0103				203.2	1.27684	0.509875	0.147247	-0.02296
								203.4	0.940107	0.347312	0.056049	-0.04164			203.4	1.21833	0.510387	0.156966	-0.01017				203.4	1.27768	0.509894	0.147518	-0.02286
								203.6	0.940807	0.347683	0.056366	-0.04213			203.6	1.21855	0.51064	0.156701	-0.01004				203.6	1.27815	0.509983	0.147323	-0.02264
								203.8	0.941564	0.348314	0.055856	-0.04226			203.8	1.21874	0.511049	0.156908	-0.00985				203.8	1.27923	0.511061	0.147678	-0.02272
								204	0.942164	0.348369	0.056059	-0.04221			204	1.21903	0.511053	0.156927	-0.00914				204	1.27955	0.511482	0.148012	-0.02301
								204.2	0.942759	0.348699	0.05623	-0.04206			204.2	1.21977	0.511087	0.157147	-0.00893				204.2	1.28047	0.511568	0.14797	-0.02328
								204.4	0.943306	0.349103	0.056717	-0.04179			204.4	1.22067	0.511174	0.157578	-0.00823				204.4	1.28095	0.512491	0.147809	-0.02299
								204.6	0.943613	0.349496	0.057206	-0.04132			204.6	1.22138	0.511708	0.15819	-0.00858				204.6	1.28219	0.512966	0.148392	-0.02296
								204.8	0.944309	0.349692	0.057802	-0.04103			204.8	1.22211	0.511494	0.158223	-0.00861				204.8	1.28292	0.513924	0.148578	-0.02265
								205	0.94484	0.349904	0.058016	-0.0409			205	1.22277	0.512337	0.158461	-0.00865				205	1.28368	0.514816	0.148089	-0.02253
								205.2	0.945157	0.349983	0.058615	-0.04082			205.2	1.22388	0.512728	0.159087	-0.0089				205.2	1.28454	0.516111	0.148435	-0.02192
								205.4	0.945478	0.350553	0.059087	-0.04075			205.4	1.22464	0.512923	0.159332	-0.00885				205.4	1.28505	0.516683	0.148916	-0.022
								205.6	0.945636	0.351163	0.059339	-0.04071			205.6	1.22539	0.513439	0.159914	-0.00845				205.6	1.28558	0.517194	0.148875	-0.02197
								205.8	0.945722	0.351503	0.059478	-0.04084			205.8	1.22588	0.514309	0.160579	-0.00886				205.8	1.28587	0.517768	0.148974	-0.02215
								206	0.945798	0.351681	0.059981	-0.04067			206	1.22655	0.514974	0.161245	-0.00854				206	1.28627	0.518002	0.149427	-0.02211
								206.2	0.946201	0.352103	0.059964	-0.04035			206.2	1.22744	0.51537	0.160968	-0.00835				206.2	1.28682	0.519093	0.149367	-0.02207
								206.4	0.946853	0.352369	0.060166	-0.04048			206.4	1.22813	0.515833	0.161312	-0.00833				206.4	1.28738	0.519686	0.149636	-0.02175
								206.6	0.947419	0.352471	0.060569	-0.04063			206.6	1.22872	0.516845	0.161319	-0.00848				206.6	1.28756	0.520246	0.149465	-0.02151
								206.8	0.947868	0.352601	0.060254	-0.04084			206.8	1.22894	0.517499	0.161325	-0.00857				206.8	1.28761	0.520303	0.149693	-0.02116
								207	0.948416	0.35278	0.060292	-0.04083			207	1.22967	0.518628	0.161554	-0.00877				207	1.28793	0.520636	0.149754	-0.02116
								207.2	0.949355	0.353031	0.060448	-0.04058			207.2	1.23038	0.51954	0.161614	-0.00906				207.2	1.289	0.520249	0.150111	-0.02088
								207.4	0.949843	0.353084	0.06053	-0.04093			207.4	1.23059	0.520247	0.161836	-0.00881				207.4	1.28965	0.520267	0.150063	-0.02147
								207.6	0.950197	0.353836	0.060542	-0.04088			207.6	1.23091	0.520666	0.161725	-0.00916				207.6	1.28999	0.520504	0.15017	-0.02144
								207.8	0.950151	0.354023	0.0603	-0.04074			207.8	1.23145	0.521172	0.161807	-0.00941				207.8	1.29084	0.520552	0.150192	-0.02172
								208	0.950321	0.354389	0.06017	-0.0407			208	1.23229	0.52168	0.161941	-0.00937				208	1.29148	0.52039	0.150437	-0.022
								208.2	0.95063	0.354595	0.060301	-0.0407			208.2	1.23293	0.522608	0.162184	-0.00912				208.2	1.29221	0.520722	0.150045	-0.02188
								208.4	0.951378	0.354437	0.060539	-0.04061			208.4	1.23345	0.523298	0.162499	-0.00918				208.4	1.29256	0.521264	0.149912	-0.02159
								208.6	0.952135	0.354587	0.060902	-0.04064			208.6	1.23362	0.524035	0.162839	-0.00884				208.6	1.29332	0.52122	0.150374	-0.02154
								208.8	0.952613	0.354769	0.061087	-0.04123			208.8	1.23401	0.524386	0.163249	-0.00861				208.8	1.29412	0.521448	0.150292	-0.02101
								209	0.952878	0.355309	0.060839	-0.04102			209	1.23425	0.524653	0.163656	-0.00831				209	1.29493	0.521954	0.14987	-0.02055
								209.2	0.953297	0.355857	0.060922	-0.04079			209.2	1.23483	0.524549	0.164181	-0.00828				209.2	1.2954	0.522679	0.150411	-0.02061
								209.4	0.953911	0.356325	0.061089	-0.04027			209.4	1.23504	0.524388	0.164287	-0.00794				209.4	1.29582	0.522868	0.150744	-0.02073
								209.6	0.954385	0.356329	0.061357	-0.04015			209.6	1.23562	0.524942	0.164953	-0.00799				209.6	1.29665	0.522919	0.151038	-0.02082
								209.8	0.954481	0.356274	0.061718	-0.04004			209.8	1.23655	0.524953	0.165047	-0.00772				209.8	1.29731	0.523678	0.15178	-0.02088
								210	0.955086	0.356225	0.062013	-0.03984			210	1.2375	0.524618	0.165263	-0.00739				210	1.29787	0.524357	0.152166	-0.02062
								210.2	0.956016	0.356783	0.061865	-0.04001			210.2	1.23822	0.524682	0.165357	-0.00748				210.2	1.29872	0.525503	0.152089	-0.02091
								210.4	0.956906	0.357173	0.0624	-0.04057			210.4	1.23929	0.524876	0.165654	-0.00749				210.4	1.29937	0.526208	0.152148	-0.02051
								210.6	0.957246	0.357732	0.062429	-0.04017			210.6	1.23993	0.525375	0.165414	-0.00721				210.6	1.29944	0.526493	0.152332	-0.02024
								210.8	0.95771	0.358202	0.062253	-0.04022			210.8	1.24038	0.525653	0.165597	-0.00768				210.8	1.30004	0.526959	0.15269	-0.02021
								211	0.958135	0.358582	0.062311	-0.04027			211	1.24178	0.52602	0.165846	-0.00763				211	1.3009	0.527906	0.153193	-0.02024
								211.2	0.958806	0.35871	0.062638	-0.04021			211.2	1.24265	0.526316	0.166166	-0.00787				211.2	1.30142	0.528128	0.153713	-0.02047
								211.4	0.959167	0.358993	0.062734	-0.04058			211.4	1.24349	0.526457	0.166267	-0.00789				211.4	1.30186	0.528954	0.154203	-0.02112
								211.6	0.959769	0.359506	0.062444	-0.04067			211.6	1.2448	0.527178	0.166362	-0.00844				211.6	1.30246	0.529264	0.15506	-0.02096
								211.8	0.959821	0.359938	0.062381	-0.04141			211.8	1.24589	0.52751	0.166164	-0.00863				211.8	1.3032	0.52939	0.155383	-0.02114
								212	0.960555	0.36049	0.062528	-0.04146			212	1.2468	0.528201	0.166384	-0.00802				212	1.30343	0.530235	0.155773	-0.02139
								212.2	0.961382	0.360487	0.062778	-0.04177			212.2	1.24756	0.528531	0.166569	-0.00789				212.2	1.30368	0.53048	0.155802	-0.02109
								212.4	0.962147	0.360583	0.062961	-0.04165			212.4	1.2484	0.529064	0.166528	-0.00793				212.4	1.30411	0.53061	0.156278	-0.02107
								212.6	0.962377	0.361138	0.063067	-0.04191			212.6	1.24948	0.529509	0.166535	-0.00723				212.6	1.30496	0.530601	0.156721	-0.02105
								212.8	0.962937	0.361829	0.063028	-0.04205			212.8	1.25023	0.530009	0.166448	-0.00727				212.8	1.30557	0.531207	0.156885	-0.02058
								213	0.963634	0.362121	0.063114	-0.04135			213	1.25089	0.530578	0.16648	-0.00756				213	1.30562	0.531931	0.156762	-0.02082
								213.2	0.964384	0.362263	0.063776	-0.04065			213.2	1.25132	0.530741	0.166198	-0.00745				213.2	1.30613	0.531825	0.157126	-0.02095
								213.4	0.964868	0.362055	0.0643	-0.04016			213.4	1.2517	0.531324	0.166293	-0.00754				213.4	1.30733	0.532134	0.157203	-0.0206
								213.6	0.965009	0.362008	0.064339	-0.04019			213.6	1.25222	0.532285	0.166398	-0.00746				213.6	1.30838	0.532737	0.157699	-0.02075
								213.8	0.965031	0.362446	0.064712	-0.04009			213.8	1.25275	0.532178	0.166231	-0.00749				213.8	1.30976	0.533564	0.157953	-0.02021
								214	0.965755	0.363043	0.064838	-0.04002			214	1.25295	0.532428	0.166238	-0.00773				214	1.31084	0.534343	0.157191	-0.02016
								214.2	0.966126	0.3636	0.065513	-0.03987			214.2	1.2528	0.532809	0.166631	-0.008				214.2	1.31177	0.534495	0.157086	-0.02023
								214.4	0.966212	0.364218	0.065592	-0.03967			214.4	1.25335	0.53305	0.166982	-0.00798				214.4	1.31284	0.535364	0.156955	-0.0199
								214.6	0.966168	0.364531	0.065376	-0.03936			214.6	1.25342	0.533822	0.167614	-0.00793				214.6	1.31393	0.536235	0.156943	-0.01996
								214.8	0.966269	0.365087	0.06555	-0.03917			214.8	1.25333	0.53417	0.168335	-0.00796				214.8	1.31486	0.536887	0.157117	-0.02021
								215	0.966762	0.365639	0.065748	-0.03897			215	1.25368	0.534665	0.168932	-0.00767				215	1.31543	0.53721	0.157294	-0.02014
								215.2	0.967688	0.366293	0.06606	-0.03885			215.2	1.25412	0.53532	0.16962	-0.00795				215.2	1.31621	0.537407	0.157036	-0.02067
								215.4	0.968055	0.366645	0.066015	-0.03888			215.4	1.25452	0.535668	0.170177	-0.00752				215.4	1.31673	0.537905	0.157421	-0.02088
								215.6	0.968439	0.367497	0.066087	-0.03895			215.6	1.25506	0.536266	0.170821	-0.00741				215.6	1.31748	0.538248	0.157918	-0.02091
								215.8	0.968579	0.367766	0.066231	-0.03884			215.8	1.2552	0.536424	0.171179	-0.00676				215.8	1.31831	0.538595	0.158333	-0.02054
								216	0.969544	0.368168	0.066459	-0.03867			216	1.25532	0.536716	0.171868	-0.00607				216	1.31889	0.538787	0.158937	-0.02067
								216.2	0.970327	0.368247	0.066192	-0.03928			216.2	1.25623	0.537352	0.172202	-0.00611				216.2	1.32003	0.538551	0.159382	-0.02089
								216.4	0.971102	0.368347	0.066232	-0.03941			216.4	1.25683	0.538203	0.172313	-0.00625				216.4	1.32049	0.538922	0.159837	-0.02119
								216.6	0.972069	0.368689	0.066583	-0.04009			216.6	1.25777	0.538705	0.172398	-0.00617				216.6	1.32114	0.539514	0.159789	-0.02105
								216.8	0.97348	0.368784	0.066719	-0.04026			216.8	1.25829	0.538723	0.172452	-0.00605				216.8	1.32126	0.540351	0.159699	-0.02082
								217	0.974129	0.368464	0.066722	-0.03988			217	1.25884	0.539483	0.172417	-0.006				217	1.32133	0.540597	0.159921	-0.02074
								217.2	0.974525	0.368413	0.066559	-0.03967			217.2	1.25944	0.539438	0.172294	-0.00547				217.2	1.32231	0.540753	0.160192	-0.02039
								217.4	0.975385	0.36819	0.066395	-0.04007			217.4	1.26032	0.539416	0.17252	-0.00516				217.4	1.32358	0.541684	0.160284	-0.02007
								217.6	0.976037	0.368196	0.066088	-0.04021			217.6	1.26097	0.539891	0.172172	-0.00484				217.6	1.324	0.542142	0.160388	-0.01981
								217.8	0.976933	0.3685	0.066509	-0.04066			217.8	1.26174	0.53988	0.17211	-0.00527				217.8	1.32505	0.542445	0.160003	-0.01938
								218	0.977517	0.369178	0.066431	-0.04076			218	1.26251	0.54038	0.171885	-0.0053				218	1.32565	0.542768	0.159668	-0.0192
								218.2	0.978328	0.369478	0.066808	-0.04052			218.2	1.26329	0.540572	0.172322	-0.00534				218.2	1.32578	0.543023	0.159955	-0.01927
								218.4	0.978807	0.369625	0.066439	-0.0409			218.4	1.26453	0.540639	0.172484	-0.00532				218.4	1.32644	0.543896	0.15996	-0.01924
								218.6	0.979496	0.369995	0.066352	-0.04095			218.6	1.26525	0.541163	0.172509	-0.00542				218.6	1.32685	0.544245	0.159988	-0.01881
								218.8	0.979775	0.37059	0.066632	-0.04059			218.8	1.26581	0.54118	0.172729	-0.00505				218.8	1.32685	0.544592	0.159849	-0.01847
								219	0.980575	0.371311	0.06636	-0.0408			219	1.2665	0.541487	0.173293	-0.00491				219	1.32716	0.545218	0.159692	-0.01847
								219.2	0.980973	0.371908	0.065964	-0.04084			219.2	1.26733	0.542073	0.17374	-0.00467				219.2	1.3276	0.546045	0.159649	-0.01873
								219.4	0.980877	0.371959	0.066076	-0.0408			219.4	1.26785	0.542228	0.174187	-0.00435				219.4	1.32833	0.546598	0.160222	-0.01852
								219.6	0.980944	0.372328	0.066032	-0.04079			219.6	1.26796	0.54248	0.174193	-0.00449				219.6	1.32949	0.547009	0.160658	-0.01851
								219.8	0.98093	0.372484	0.066071	-0.04086			219.8	1.26837	0.543224	0.174139	-0.00418				219.8	1.33018	0.547029	0.161226	-0.01854
								220	0.981204	0.372788	0.066344	-0.04144			220	1.26921	0.543598	0.174232	-0.00417				220	1.33071	0.546918	0.161688	-0.01898
								220.2	0.981424	0.372678	0.0668	-0.04201			220.2	1.27011	0.544567	0.174356	-0.00445				220.2	1.33144	0.5475	0.162028	-0.01937
								220.4	0.981879	0.372824	0.067298	-0.0416			220.4	1.2707	0.545106	0.174488	-0.00474				220.4	1.33217	0.548095	0.162286	-0.01952
								220.6	0.981822	0.373004	0.067758	-0.04187			220.6	1.2717	0.545785	0.174537	-0.00494				220.6	1.33275	0.548516	0.162845	-0.01931
								220.8	0.981964	0.37299	0.067502	-0.04157			220.8	1.27213	0.54625	0.175019	-0.00509				220.8	1.3331	0.54885	0.163193	-0.01927
								221	0.981877	0.373408	0.067531	-0.04147			221	1.27226	0.547255	0.17494	-0.00526				221	1.3338	0.549545	0.163624	-0.01941
								221.2	0.982237	0.373678	0.067388	-0.04151			221.2	1.27272	0.547751	0.175195	-0.00509				221.2	1.33487	0.550396	0.163489	-0.01926
								221.4	0.982794	0.373873	0.067589	-0.0414			221.4	1.27333	0.548427	0.175364	-0.00509				221.4	1.33563	0.551034	0.163671	-0.01908
								221.6	0.98335	0.374001	0.067369	-0.04116			221.6	1.27376	0.549872	0.174919	-0.00549				221.6	1.33592	0.550903	0.163543	-0.01908
								221.8	0.983605	0.374409	0.067249	-0.04146			221.8	1.27397	0.550188	0.175157	-0.00554				221.8	1.33657	0.551498	0.16357	-0.01909
								222	0.984197	0.3751	0.06762	-0.04142			222	1.27409	0.550844	0.175171	-0.00554				222	1.33722	0.551901	0.163685	-0.01898
								222.2	0.985395	0.375541	0.067715	-0.04086			222.2	1.27445	0.550834	0.175886	-0.00546				222.2	1.33716	0.552236	0.163902	-0.01909
								222.4	0.986065	0.375466	0.067189	-0.04081			222.4	1.27473	0.550847	0.175805	-0.00519				222.4	1.3378	0.55295	0.164069	-0.01904
								222.6	0.986824	0.375964	0.067142	-0.03981			222.6	1.27496	0.551479	0.175779	-0.00482				222.6	1.33848	0.553776	0.164201	-0.01866
								222.8	0.987097	0.376622	0.066908	-0.03924			222.8	1.27519	0.551302	0.176298	-0.00437				222.8	1.33895	0.554599	0.164006	-0.01837
								223	0.987923	0.377314	0.066666	-0.03913			223	1.27544	0.55199	0.176646	-0.00431				223	1.33952	0.555046	0.164438	-0.0185
								223.2	0.98869	0.37751	0.066834	-0.03901			223.2	1.2762	0.552652	0.176727	-0.00403				223.2	1.34052	0.555614	0.164695	-0.01851
								223.4	0.988937	0.377869	0.06743	-0.03868			223.4	1.27652	0.55247	0.177031	-0.00391				223.4	1.34142	0.555836	0.165018	-0.01823
								223.6	0.989406	0.378443	0.067855	-0.03892			223.6	1.27689	0.552624	0.177093	-0.00358				223.6	1.34167	0.556169	0.165524	-0.01829
								223.8	0.98981	0.378706	0.068759	-0.03888			223.8	1.27784	0.552833	0.176995	-0.00348				223.8	1.34185	0.556422	0.166434	-0.01811
								224	0.990468	0.378929	0.069426	-0.03892			224	1.279	0.553023	0.177459	-0.00315				224	1.34257	0.556644	0.167258	-0.01829
								224.2	0.991027	0.379048	0.070166	-0.03887			224.2	1.27961	0.553402	0.177762	-0.00312				224.2	1.34331	0.556702	0.167918	-0.01813
								224.4	0.991285	0.379563	0.070364	-0.03871			224.4	1.27986	0.55335	0.177762	-0.0035				224.4	1.34407	0.556813	0.167941	-0.01837
								224.6	0.991502	0.379769	0.070692	-0.03933			224.6	1.28016	0.553648	0.178008	-0.00375				224.6	1.3446	0.557371	0.16851	-0.01803
								224.8	0.992116	0.380173	0.071242	-0.03972			224.8	1.28031	0.554054	0.178811	-0.00377				224.8	1.3453	0.557764	0.168388	-0.01836
								225	0.992248	0.380474	0.071555	-0.04036			225	1.2807	0.554233	0.178515	-0.00378				225	1.34607	0.558839	0.168688	-0.01853
								225.2	0.992834	0.380663	0.071559	-0.04064			225.2	1.28093	0.555145	0.178736	-0.00402				225.2	1.34649	0.559449	0.168737	-0.01841
								225.4	0.993353	0.380924	0.071553	-0.04106			225.4	1.28129	0.555741	0.179109	-0.00424				225.4	1.34688	0.559685	0.168901	-0.01812
								225.6	0.993755	0.38127	0.071373	-0.04102			225.6	1.28129	0.555924	0.179146	-0.00452				225.6	1.34721	0.559692	0.168641	-0.01785
								225.8	0.993923	0.381609	0.071312	-0.04114			225.8	1.28144	0.555709	0.179904	-0.00444				225.8	1.34776	0.56008	0.168708	-0.01784
								226	0.99504	0.382301	0.071548	-0.04042			226	1.28165	0.556264	0.180179	-0.00439				226	1.34852	0.560601	0.168379	-0.01729
								226.2	0.995667	0.382901	0.070752	-0.03961			226.2	1.28254	0.556658	0.18049	-0.00469				226.2	1.34885	0.560656	0.168402	-0.01709
								226.4	0.996204	0.382955	0.070083	-0.03938			226.4	1.28277	0.557298	0.180418	-0.00492				226.4	1.34962	0.561251	0.168242	-0.01729
								226.6	0.996768	0.383456	0.070136	-0.0387			226.6	1.28317	0.557973	0.180388	-0.00491				226.6	1.35019	0.561619	0.168079	-0.01694
								226.8	0.997445	0.384171	0.069609	-0.03857			226.8	1.28406	0.558579	0.18064	-0.00486				226.8	1.35062	0.561601	0.167895	-0.0168
								227	0.998314	0.384674	0.069896	-0.03887			227	1.28509	0.559895	0.180785	-0.00439				227	1.35128	0.561878	0.168034	-0.01713
								227.2	0.999043	0.384926	0.070025	-0.03903			227.2	1.28631	0.560372	0.181056	-0.00397				227.2	1.35172	0.562055	0.167975	-0.0168
								227.4	1.00011	0.385245	0.070336	-0.03931			227.4	1.28707	0.56072	0.181035	-0.00397				227.4	1.352	0.562321	0.167761	-0.01651
								227.6	1.00086	0.385086	0.070599	-0.03902			227.6	1.2879	0.560965	0.180801	-0.00365				227.6	1.35267	0.562627	0.168458	-0.01647
								227.8	1.00155	0.385326	0.070794	-0.03893			227.8	1.28844	0.561238	0.180597	-0.00367				227.8	1.35348	0.563105	0.168979	-0.01655
								228	1.00215	0.385678	0.070662	-0.03944			228	1.28972	0.561839	0.180978	-0.0032				228	1.35419	0.563217	0.169303	-0.01693
								228.2	1.00255	0.385852	0.070889	-0.03973			228.2	1.29015	0.561958	0.181128	-0.00301				228.2	1.3552	0.563384	0.169311	-0.01703
								228.4	1.00286	0.386127	0.071139	-0.03987			228.4	1.29025	0.562292	0.18155	-0.00322				228.4	1.3557	0.564117	0.16915	-0.01753
								228.6	1.00348	0.385961	0.071587	-0.04052			228.6	1.29086	0.562739	0.181922	-0.00348				228.6	1.35654	0.56482	0.169613	-0.01757
								228.8	1.00361	0.38617	0.071766	-0.04081			228.8	1.2917	0.563545	0.182789	-0.00367				228.8	1.35663	0.565007	0.169726	-0.01801
								229	1.00368	0.386275	0.071962	-0.04124			229	1.29225	0.563902	0.183164	-0.00379				229	1.3573	0.565981	0.169438	-0.01799
								229.2	1.00411	0.386746	0.072007	-0.0414			229.2	1.29267	0.564702	0.183968	-0.00404				229.2	1.35816	0.566312	0.169739	-0.0179
								229.4	1.00442	0.387087	0.072004	-0.04186			229.4	1.29329	0.564984	0.184406	-0.00388				229.4	1.35901	0.566885	0.170276	-0.01739
								229.6	1.00445	0.387614	0.07208	-0.04137			229.6	1.29367	0.565431	0.184968	-0.00399				229.6	1.35974	0.566795	0.170869	-0.01755
								229.8	1.00471	0.387832	0.072254	-0.04138			229.8	1.29484	0.565651	0.185587	-0.00358				229.8	1.36044	0.566865	0.171053	-0.01782
								230	1.00516	0.388226	0.072456	-0.04079			230	1.29554	0.5665	0.185611	-0.00342				230	1.3612	0.567639	0.171234	-0.01762
								230.2	1.00545	0.388706	0.072403	-0.04083			230.2	1.29635	0.567192	0.185646	-0.0034				230.2	1.36184	0.568182	0.171849	-0.01804
								230.4	1.00592	0.388632	0.072354	-0.04101			230.4	1.2965	0.567572	0.185593	-0.00297				230.4	1.36232	0.568839	0.172235	-0.01835
								230.6	1.00609	0.389007	0.072537	-0.04076			230.6	1.29689	0.568019	0.185602	-0.00247				230.6	1.36313	0.569382	0.172196	-0.01815
								230.8	1.00644	0.389257	0.072025	-0.04091			230.8	1.29766	0.568387	0.18569	-0.00203				230.8	1.36338	0.569765	0.171922	-0.01816
								231	1.00675	0.389473	0.072355	-0.04091			231	1.29836	0.568688	0.186114	-0.00162				231	1.36397	0.570419	0.171723	-0.01786
								231.2	1.0072	0.389283	0.072761	-0.04048			231.2	1.29899	0.568736	0.185761	-0.00164				231.2	1.36432	0.57074	0.171803	-0.01735
								231.4	1.00802	0.389405	0.072548	-0.04022			231.4	1.29914	0.568806	0.185327	-0.0018				231.4	1.36474	0.571632	0.171684	-0.01735
								231.6	1.00841	0.389662	0.072498	-0.03964			231.6	1.29949	0.568715	0.185124	-0.0017				231.6	1.36525	0.572014	0.17203	-0.01718
								231.8	1.00866	0.390185	0.072421	-0.0399			231.8	1.3001	0.568678	0.185145	-0.00147				231.8	1.36587	0.573144	0.172364	-0.01723
								232	1.00885	0.390185	0.072486	-0.04011			232	1.30086	0.568917	0.185157	-0.00151				232	1.36655	0.573946	0.172623	-0.01706
								232.2	1.00922	0.390567	0.072569	-0.03985			232.2	1.30058	0.569035	0.185148	-0.00135				232.2	1.36695	0.574284	0.172783	-0.01717
								232.4	1.00963	0.390914	0.073	-0.03931			232.4	1.30063	0.569505	0.185189	-0.00176				232.4	1.36715	0.574798	0.172858	-0.01699
								232.6	1.00997	0.391421	0.073022	-0.03954			232.6	1.30085	0.569623	0.18536	-0.00198				232.6	1.36752	0.575073	0.173069	-0.01696
								232.8	1.01002	0.392159	0.073163	-0.03958			232.8	1.30119	0.569868	0.186224	-0.00165				232.8	1.36797	0.575822	0.173086	-0.01657
								233	1.0107	0.392799	0.073333	-0.0397			233	1.30195	0.570203	0.186163	-0.00162				233	1.3687	0.576475	0.172938	-0.01601
								233.2	1.01128	0.393093	0.073146	-0.03959			233.2	1.30289	0.570933	0.186527	-0.00176				233.2	1.36922	0.576683	0.174001	-0.01561
								233.4	1.01185	0.393595	0.073394	-0.03962			233.4	1.30342	0.571435	0.186475	-0.00117				233.4	1.3697	0.576965	0.174818	-0.01526
								233.6	1.01286	0.394073	0.073956	-0.03911			233.6	1.30421	0.57215	0.186855	-0.00103				233.6	1.36972	0.576659	0.175192	-0.01528
								233.8	1.01363	0.394468	0.074263	-0.03891			233.8	1.30529	0.572516	0.187264	-0.00073				233.8	1.36985	0.5769	0.175587	-0.01559
								234	1.01416	0.395081	0.074407	-0.03862			234	1.3056	0.573478	0.187048	-0.00062				234	1.37051	0.577563	0.176244	-0.01553
								234.2	1.01497	0.395669	0.074551	-0.03873			234.2	1.30613	0.573968	0.187021	-0.00078				234.2	1.37125	0.577802	0.177237	-0.01575
								234.4	1.01551	0.395677	0.074541	-0.03883			234.4	1.30664	0.574808	0.187657	-0.00087				234.4	1.37165	0.577584	0.177535	-0.01575
								234.6	1.01562	0.395846	0.074799	-0.03868			234.6	1.30722	0.575426	0.188105	-0.00128				234.6	1.37218	0.57793	0.177561	-0.01538
								234.8	1.01622	0.395613	0.07472	-0.03888			234.8	1.30773	0.576072	0.188258	-0.00144				234.8	1.37271	0.577999	0.177625	-0.01541
								235	1.01654	0.395909	0.075479	-0.03864			235	1.30812	0.576617	0.188727	-0.00121				235	1.37387	0.578747	0.178001	-0.01537
								235.2	1.01726	0.395674	0.076081	-0.03838			235.2	1.30885	0.576941	0.188276	-0.00158				235.2	1.37451	0.57884	0.178511	-0.01525
								235.4	1.0177	0.396083	0.075555	-0.03836			235.4	1.3092	0.577265	0.188466	-0.00175				235.4	1.37508	0.579285	0.178608	-0.01509
								235.6	1.01823	0.396407	0.07555	-0.0387			235.6	1.31006	0.577482	0.188487	-0.00169				235.6	1.37602	0.579544	0.178825	-0.01486
								235.8	1.01829	0.396307	0.075534	-0.03906			235.8	1.31056	0.577698	0.188803	-0.00128				235.8	1.37684	0.580765	0.178946	-0.01527
								236	1.0186	0.3964	0.075576	-0.03927			236	1.31058	0.57799	0.188726	-0.00116				236	1.37779	0.580993	0.178876	-0.01539
								236.2	1.01952	0.397284	0.075313	-0.03934			236.2	1.31059	0.578468	0.189088	-0.00104				236.2	1.37844	0.58103	0.178473	-0.01559
								236.4	1.01963	0.397684	0.075383	-0.03932			236.4	1.31111	0.578532	0.189544	-0.00131				236.4	1.37916	0.581581	0.178033	-0.01526
								236.6	1.01992	0.398015	0.074918	-0.03989			236.6	1.31159	0.578561	0.190186	-0.00106				236.6	1.3797	0.58204	0.177797	-0.0152
								236.8	1.02016	0.398062	0.074802	-0.04017			236.8	1.31243	0.578923	0.190853	-0.00089				236.8	1.38036	0.582658	0.177668	-0.01503
								237	1.02094	0.398315	0.074896	-0.04021			237	1.31381	0.579328	0.191443	-0.00092				237	1.38061	0.583202	0.177472	-0.0153
								237.2	1.02118	0.397906	0.07536	-0.04007			237.2	1.31442	0.579617	0.191951	-0.00069				237.2	1.38116	0.583158	0.177576	-0.01579
								237.4	1.02211	0.39863	0.075352	-0.04028			237.4	1.31506	0.579729	0.192604	-0.00044				237.4	1.38169	0.583625	0.177231	-0.01594
								237.6	1.02256	0.398941	0.075271	-0.03991			237.6	1.31582	0.579834	0.193144	-0.00097				237.6	1.38185	0.584209	0.176955	-0.01622
								237.8	1.02301	0.399322	0.075223	-0.03992			237.8	1.31635	0.580167	0.193327	-0.00111				237.8	1.38263	0.584606	0.177278	-0.01665
								238	1.02335	0.399591	0.075676	-0.04011			238	1.31651	0.580417	0.193264	-0.00181				238	1.38366	0.585098	0.177342	-0.01669
								238.2	1.02367	0.399861	0.076055	-0.03987			238.2	1.31728	0.581074	0.193339	-0.00196				238.2	1.38396	0.585183	0.177829	-0.01711
								238.4	1.02378	0.400213	0.076375	-0.03974			238.4	1.31775	0.58178	0.193975	-0.00164				238.4	1.38403	0.585327	0.177897	-0.01696
								238.6	1.02359	0.400149	0.076715	-0.03938			238.6	1.31835	0.582622	0.193752	-0.00195				238.6	1.38474	0.586445	0.177651	-0.01676
								238.8	1.02398	0.4003	0.07697	-0.03927			238.8	1.3184	0.58336	0.193432	-0.00199				238.8	1.38596	0.586389	0.177622	-0.01654
								239	1.02401	0.40079	0.07736	-0.03905			239	1.31869	0.583661	0.19303	-0.00181				239	1.38661	0.587255	0.178011	-0.0161
								239.2	1.02439	0.401264	0.077283	-0.03887			239.2	1.31933	0.584256	0.192818	-0.00232				239.2	1.38683	0.587744	0.178157	-0.0161
								239.4	1.02445	0.402012	0.077149	-0.03872			239.4	1.31989	0.584774	0.192841	-0.00209				239.4	1.38708	0.58818	0.178228	-0.01588
								239.6	1.02455	0.402138	0.07742	-0.03867			239.6	1.32038	0.585268	0.19227	-0.00199				239.6	1.38731	0.588399	0.178497	-0.01583
								239.8	1.02456	0.402278	0.077502	-0.03861			239.8	1.32041	0.585797	0.192365	-0.00183				239.8	1.38783	0.589052	0.178403	-0.01603
								240	1.02551	0.402842	0.07794	-0.03819			240	1.32062	0.585889	0.192306	-0.00183				240	1.38846	0.589117	0.178786	-0.01549
								240.2	1.0265	0.40377	0.077782	-0.03825			240.2	1.3209	0.586328	0.192429	-0.00199				240.2	1.38875	0.589524	0.178745	-0.01521
								240.4	1.02644	0.403837	0.077925	-0.038			240.4	1.32165	0.586434	0.192517	-0.002				240.4	1.38919	0.58994	0.179402	-0.01468
								240.6	1.02693	0.403809	0.078085	-0.03791			240.6	1.32197	0.586778	0.192767	-0.00212				240.6	1.38961	0.590009	0.179914	-0.01496
								240.8	1.0273	0.40435	0.078598	-0.03779			240.8	1.32258	0.587135	0.193198	-0.00182				240.8	1.39026	0.590544	0.180385	-0.01505
								241	1.02822	0.404761	0.078956	-0.03752			241	1.32314	0.587191	0.193687	-0.00169				241	1.391	0.591277	0.180396	-0.01487
								241.2	1.02867	0.40447	0.078801	-0.03734			241.2	1.32353	0.587545	0.193602	-0.00142				241.2	1.3918	0.591138	0.180726	-0.01449
								241.4	1.02958	0.405613	0.078721	-0.03729			241.4	1.32411	0.587486	0.194244	-0.00122				241.4	1.39232	0.591665	0.18057	-0.01436
								241.6	1.03034	0.40558	0.078909	-0.03732			241.6	1.32444	0.587506	0.194467	-0.00133				241.6	1.39323	0.592299	0.180661	-0.01442
								241.8	1.03163	0.405385	0.079159	-0.03774			241.8	1.32503	0.587774	0.194368	-0.00126				241.8	1.39386	0.592632	0.181227	-0.01464
								242	1.0323	0.405553	0.079708	-0.03773			242	1.32535	0.588077	0.194883	-0.00077				242	1.39475	0.593073	0.181293	-0.01457
								242.2	1.03261	0.405619	0.079888	-0.03763			242.2	1.326	0.588576	0.195475	-0.00017				242.2	1.39497	0.593236	0.181617	-0.01471
								242.4	1.03293	0.405745	0.080091	-0.03801			242.4	1.32671	0.588649	0.195802	0.000483				242.4	1.39571	0.593977	0.181633	-0.01423
								242.6	1.03318	0.40564	0.080274	-0.03811			242.6	1.32755	0.589198	0.195966	0.000588				242.6	1.39656	0.594447	0.181577	-0.01478
								242.8	1.03369	0.405679	0.080095	-0.03838			242.8	1.32811	0.589288	0.195796	0.000683				242.8	1.39738	0.594683	0.182067	-0.01462
								243	1.03392	0.40586	0.080048	-0.03869			243	1.32878	0.589688	0.195997	0.001154				243	1.39799	0.59576	0.182529	-0.0153
								243.2	1.03406	0.405799	0.079983	-0.0388			243.2	1.32981	0.59019	0.196654	0.001209				243.2	1.39849	0.596483	0.182894	-0.0159
								243.4	1.0343	0.405849	0.080183	-0.03893			243.4	1.33049	0.590094	0.196896	0.001625				243.4	1.39886	0.596252	0.183349	-0.01575
								243.6	1.0344	0.406065	0.079937	-0.03895			243.6	1.33119	0.590567	0.196942	0.001482				243.6	1.39946	0.596717	0.183702	-0.01635
								243.8	1.03493	0.406373	0.080212	-0.03931			243.8	1.33164	0.59096	0.197218	0.001586				243.8	1.40011	0.597263	0.183861	-0.01652
								244	1.03558	0.406711	0.080718	-0.03948			244	1.33246	0.591226	0.196926	0.001567				244	1.40071	0.597848	0.184157	-0.01646
								244.2	1.03556	0.407243	0.080303	-0.03967			244.2	1.33298	0.591858	0.197239	0.00163				244.2	1.40153	0.598274	0.184128	-0.0169
								244.4	1.03529	0.407425	0.080538	-0.03931			244.4	1.33368	0.592472	0.197108	0.001546				244.4	1.4023	0.598233	0.184192	-0.01704
								244.6	1.03551	0.407995	0.080803	-0.03905			244.6	1.33371	0.592951	0.197551	0.001249				244.6	1.40275	0.598157	0.183873	-0.01721
								244.8	1.03599	0.40908	0.080766	-0.03909			244.8	1.33425	0.593314	0.197977	0.001215				244.8	1.40354	0.598762	0.183698	-0.01677
								245	1.03655	0.409393	0.080502	-0.03903			245	1.33431	0.593765	0.198043	0.001232				245	1.40392	0.599005	0.183934	-0.0167
								245.2	1.03693	0.410028	0.080499	-0.03878			245.2	1.33442	0.594355	0.197741	0.001269				245.2	1.40456	0.598843	0.183849	-0.01687
								245.4	1.03746	0.410927	0.080993	-0.03863			245.4	1.3345	0.594919	0.198029	0.001353				245.4	1.40494	0.599164	0.18375	-0.01737
								245.6	1.03857	0.410948	0.081147	-0.03864			245.6	1.33474	0.595377	0.198438	0.001276				245.6	1.40536	0.59962	0.183968	-0.01721
								245.8	1.03956	0.411518	0.081728	-0.03861			245.8	1.33541	0.596221	0.1982	0.001029				245.8	1.40573	0.599658	0.184223	-0.01745
								246	1.04005	0.411996	0.082229	-0.03811			246	1.33577	0.597025	0.19834	0.001153				246	1.40636	0.599798	0.18421	-0.01689
								246.2	1.04029	0.41229	0.082535	-0.03787			246.2	1.33637	0.597657	0.198816	0.000942				246.2	1.40646	0.60026	0.184732	-0.01682
								246.4	1.04092	0.412537	0.083036	-0.0381			246.4	1.33703	0.598309	0.198776	0.001238				246.4	1.40689	0.601049	0.184853	-0.01649
								246.6	1.04164	0.412937	0.083376	-0.03784			246.6	1.33782	0.598847	0.199611	0.001193				246.6	1.40706	0.601495	0.184997	-0.01655
								246.8	1.04229	0.413163	0.083356	-0.03782			246.8	1.33834	0.599636	0.199533	0.001385				246.8	1.40758	0.602177	0.185161	-0.01594
								247	1.04287	0.413141	0.083546	-0.03776			247	1.33841	0.600469	0.200171	0.001726				247	1.40808	0.602642	0.185469	-0.01588
								247.2	1.04349	0.413174	0.083644	-0.03766			247.2	1.33909	0.600795	0.200647	0.001723				247.2	1.40844	0.603233	0.185771	-0.01559
								247.4	1.04465	0.413907	0.083924	-0.03783			247.4	1.33943	0.601022	0.200819	0.001768				247.4	1.40935	0.603681	0.185613	-0.01552
								247.6	1.04521	0.413538	0.08418	-0.03854			247.6	1.34007	0.601748	0.200998	0.001873				247.6	1.41012	0.604618	0.185675	-0.01569
								247.8	1.04562	0.413572	0.08421	-0.0388			247.8	1.33996	0.602046	0.201171	0.002245				247.8	1.41091	0.60551	0.185621	-0.01561
								248	1.04608	0.414039	0.084257	-0.03889			248	1.34092	0.602418	0.201311	0.002317				248	1.41173	0.606001	0.185674	-0.01529
								248.2	1.04619	0.414353	0.084342	-0.03892			248.2	1.34134	0.602692	0.201794	0.002659				248.2	1.41233	0.606349	0.185623	-0.01538
								248.4	1.04668	0.414834	0.084492	-0.03915			248.4	1.34173	0.60282	0.201817	0.002738				248.4	1.41281	0.606553	0.185717	-0.01541
								248.6	1.04708	0.415155	0.08485	-0.03946			248.6	1.34148	0.602816	0.202397	0.002178				248.6	1.41317	0.607505	0.186024	-0.01541
								248.8	1.04753	0.415765	0.084578	-0.03961			248.8	1.34146	0.602548	0.202445	0.002468				248.8	1.41399	0.60818	0.186284	-0.01531
								249	1.04782	0.415952	0.084602	-0.03956			249	1.34122	0.602738	0.202524	0.002768				249	1.41435	0.608882	0.186952	-0.01529
								249.2	1.04786	0.416172	0.084578	-0.039			249.2	1.34129	0.602385	0.202421	0.002763				249.2	1.41505	0.609343	0.187338	-0.01552
								249.4	1.04759	0.416555	0.084939	-0.03884			249.4	1.34163	0.602641	0.202919	0.002784				249.4	1.41528	0.609966	0.18838	-0.01563
								249.6	1.04859	0.417444	0.084894	-0.03894			249.6	1.34227	0.602705	0.203022	0.0024				249.6	1.41585	0.610047	0.188818	-0.01532
								249.8	1.04859	0.417888	0.085424	-0.03907			249.8	1.34282	0.603246	0.202803	0.00172				249.8	1.41639	0.610252	0.189471	-0.01542
								250	1.0489	0.418029	0.085019	-0.03858			250	1.34338	0.603283	0.202752	0.001556				250	1.41673	0.610845	0.190372	-0.01453
								250.2	1.0493	0.418166	0.085359	-0.03843			250.2	1.34413	0.603535	0.20333	0.001522				250.2	1.41673	0.611482	0.191208	-0.01411
								250.4	1.04985	0.418207	0.085894	-0.03855			250.4	1.34455	0.603993	0.20314	0.001384				250.4	1.41716	0.611782	0.191781	-0.01346
								250.6	1.05003	0.418658	0.085927	-0.03817			250.6	1.34496	0.604294	0.203521	0.001412				250.6	1.41772	0.61205	0.191984	-0.01312
								250.8	1.05056	0.418867	0.085574	-0.03808			250.8	1.34485	0.604781	0.203304	0.001608				250.8	1.41848	0.612149	0.192652	-0.01301
								251	1.05088	0.418876	0.085487	-0.03753			251	1.34477	0.605114	0.203647	0.001484				251	1.41924	0.612335	0.193134	-0.01296
								251.2	1.05164	0.41948	0.085398	-0.03696			251.2	1.34562	0.604848	0.203638	0.001618				251.2	1.42011	0.613187	0.193299	-0.01271
								251.4	1.05222	0.419644	0.08538	-0.03653			251.4	1.34603	0.605265	0.203621	0.001547				251.4	1.42072	0.614334	0.193248	-0.01271
								251.6	1.05242	0.419304	0.085016	-0.03665			251.6	1.34575	0.606278	0.203894	0.001792				251.6	1.42158	0.615429	0.193219	-0.01268
								251.8	1.05279	0.419893	0.084688	-0.03624			251.8	1.34627	0.606558	0.204045	0.001787				251.8	1.42193	0.616089	0.193278	-0.01286
								252	1.05335	0.420169	0.085	-0.03622			252	1.34733	0.607486	0.203938	0.001836				252	1.42261	0.616144	0.193117	-0.01285
								252.2	1.05402	0.420496	0.084948	-0.03678			252.2	1.34739	0.608118	0.203786	0.002246				252.2	1.42296	0.616844	0.193092	-0.01312
								252.4	1.0548	0.420691	0.084529	-0.03685			252.4	1.34813	0.609017	0.203803	0.00249				252.4	1.42323	0.617513	0.193152	-0.0134
								252.6	1.0548	0.420494	0.084365	-0.03666			252.6	1.34849	0.609469	0.203823	0.002471				252.6	1.42378	0.618154	0.193326	-0.01314
								252.8	1.05502	0.420813	0.083447	-0.0367			252.8	1.34902	0.609855	0.203899	0.002929				252.8	1.42416	0.618553	0.19327	-0.01287
								253	1.05514	0.420578	0.083005	-0.03657			253	1.35005	0.610279	0.204091	0.002646				253	1.42399	0.619046	0.193511	-0.01276
								253.2	1.05474	0.420674	0.082867	-0.03679			253.2	1.35084	0.610802	0.203961	0.002927				253.2	1.42409	0.619094	0.193505	-0.01332
								253.4	1.05465	0.421161	0.083545	-0.03709			253.4	1.35174	0.611507	0.204403	0.002873				253.4	1.42444	0.619232	0.193391	-0.01337
								253.6	1.05559	0.421422	0.083187	-0.03799			253.6	1.35263	0.611818	0.204206	0.002948				253.6	1.42485	0.619295	0.192988	-0.01341
								253.8	1.05586	0.421862	0.083521	-0.0384			253.8	1.35345	0.612415	0.204306	0.002679				253.8	1.42501	0.619623	0.193561	-0.0132
								254	1.0567	0.422014	0.083481	-0.03861			254	1.35427	0.612602	0.204633	0.002788				254	1.42518	0.61986	0.193514	-0.01265
								254.2	1.05684	0.422383	0.08398	-0.03881			254.2	1.35493	0.613045	0.205096	0.002758				254.2	1.42531	0.619628	0.193483	-0.01226
								254.4	1.0569	0.423008	0.083971	-0.03951			254.4	1.35516	0.613753	0.205109	0.002646				254.4	1.42609	0.619261	0.193412	-0.01248
								254.6	1.05724	0.423619	0.083795	-0.0391			254.6	1.35572	0.613999	0.205851	0.002755				254.6	1.42687	0.61897	0.193227	-0.01244
								254.8	1.05762	0.424143	0.084175	-0.03902			254.8	1.35564	0.614188	0.206073	0.002971				254.8	1.42747	0.618843	0.193473	-0.01254
								255	1.05805	0.424696	0.084514	-0.03844			255	1.35563	0.614498	0.206491	0.002995				255	1.42776	0.619416	0.193419	-0.01254
								255.2	1.05865	0.42531	0.085128	-0.03775			255.2	1.35613	0.614689	0.206542	0.002878				255.2	1.4281	0.620364	0.193418	-0.01252
								255.4	1.05886	0.42525	0.085561	-0.03775			255.4	1.35619	0.615543	0.207007	0.003127				255.4	1.42859	0.621281	0.193063	-0.01283
								255.6	1.05931	0.425668	0.085992	-0.03772			255.6	1.35625	0.61638	0.207678	0.003334				255.6	1.4302	0.621727	0.193194	-0.01303
								255.8	1.05971	0.425748	0.086633	-0.0376			255.8	1.35722	0.617119	0.208041	0.003269				255.8	1.43069	0.621763	0.193697	-0.01321
								256	1.06062	0.426274	0.086645	-0.03705			256	1.35775	0.618052	0.208134	0.003443				256	1.4318	0.621921	0.193869	-0.01345
								256.2	1.06168	0.426648	0.086884	-0.03644			256.2	1.35813	0.61844	0.207973	0.003358				256.2	1.43222	0.622487	0.194661	-0.01333
								256.4	1.06175	0.42666	0.087019	-0.03575			256.4	1.35895	0.618944	0.207884	0.003301				256.4	1.43301	0.62277	0.195137	-0.01333
								256.6	1.06204	0.426623	0.087215	-0.0355			256.6	1.35904	0.618704	0.207886	0.003106				256.6	1.43365	0.623134	0.195562	-0.01279
								256.8	1.0623	0.426801	0.087421	-0.03579			256.8	1.35916	0.619122	0.207749	0.002742				256.8	1.43372	0.623741	0.195732	-0.01288
								257	1.06257	0.42681	0.088145	-0.0356			257	1.35975	0.619342	0.207468	0.002896				257	1.43402	0.624327	0.195675	-0.01266
								257.2	1.06271	0.42707	0.088958	-0.03605			257.2	1.36024	0.619972	0.207095	0.003428				257.2	1.43439	0.624735	0.1956	-0.01292
								257.4	1.06333	0.427613	0.088929	-0.03629			257.4	1.36067	0.620146	0.207014	0.003702				257.4	1.43528	0.625631	0.195725	-0.01266
								257.6	1.06433	0.427646	0.088813	-0.03699			257.6	1.36091	0.620195	0.206604	0.003727				257.6	1.43593	0.62603	0.195948	-0.01247
								257.8	1.06474	0.428199	0.089274	-0.03737			257.8	1.36109	0.620421	0.206686	0.003333				257.8	1.43619	0.626761	0.195913	-0.01182
								258	1.06518	0.428336	0.089714	-0.03744			258	1.36105	0.620528	0.206626	0.003635				258	1.43639	0.626942	0.195348	-0.01153
								258.2	1.0655	0.429138	0.089462	-0.03714			258.2	1.36148	0.620922	0.206645	0.003482				258.2	1.4369	0.626969	0.195323	-0.01115
								258.4	1.06605	0.429435	0.08938	-0.03751			258.4	1.36201	0.621519	0.206991	0.003856				258.4	1.43721	0.627177	0.195541	-0.01114
								258.6	1.06683	0.429571	0.089461	-0.03698			258.6	1.36231	0.621926	0.206994	0.00407				258.6	1.43763	0.627677	0.195793	-0.01131
								258.8	1.06726	0.429865	0.089393	-0.03707			258.8	1.36233	0.621999	0.206851	0.004353				258.8	1.43809	0.628188	0.195733	-0.01155
								259	1.06776	0.429945	0.08917	-0.03683			259	1.36233	0.622433	0.207177	0.004128				259	1.43862	0.629042	0.195758	-0.01141
								259.2	1.068	0.430351	0.088886	-0.03636			259.2	1.36295	0.622772	0.207529	0.003838				259.2	1.43917	0.629438	0.195845	-0.01126
								259.4	1.0677	0.430447	0.088441	-0.03662			259.4	1.36382	0.622829	0.208459	0.004209				259.4	1.43993	0.629816	0.195763	-0.0114
								259.6	1.06787	0.43073	0.088223	-0.03632			259.6	1.36496	0.623416	0.209415	0.004088				259.6	1.44095	0.630255	0.196077	-0.01158
								259.8	1.06784	0.430979	0.088049	-0.03624			259.8	1.36583	0.624094	0.210106	0.004021				259.8	1.44138	0.630052	0.196625	-0.01185
								260	1.06845	0.431584	0.087518	-0.03585			260	1.36666	0.624155	0.210447	0.004173				260	1.44222	0.63031	0.196991	-0.01182
								260.2	1.06841	0.431574	0.08745	-0.03544			260.2	1.36727	0.624455	0.211113	0.004198				260.2	1.44265	0.630751	0.197374	-0.01172
								260.4	1.06858	0.431916	0.087549	-0.03559			260.4	1.36798	0.624982	0.211193	0.00403				260.4	1.44277	0.631173	0.197369	-0.01158
								260.6	1.06878	0.432505	0.087748	-0.03585			260.6	1.36809	0.625526	0.211626	0.003589				260.6	1.44285	0.631537	0.197543	-0.0113
								260.8	1.06902	0.432651	0.087469	-0.03612			260.8	1.36858	0.626008	0.211599	0.003674				260.8	1.44312	0.632059	0.197491	-0.01123
								261	1.06931	0.433118	0.087634	-0.03634			261	1.36944	0.626492	0.211608	0.004406				261	1.44359	0.63216	0.197637	-0.0108
								261.2	1.06937	0.433576	0.087792	-0.03681			261.2	1.37008	0.627328	0.211528	0.004758				261.2	1.444	0.632512	0.197764	-0.01085
								261.4	1.06957	0.434028	0.087722	-0.0372			261.4	1.37065	0.627536	0.211462	0.004978				261.4	1.4449	0.632861	0.197574	-0.01041
								261.6	1.0701	0.433728	0.088332	-0.03761			261.6	1.37089	0.627481	0.211286	0.004514				261.6	1.44529	0.632581	0.197446	-0.01025
								261.8	1.07023	0.434399	0.089016	-0.03814			261.8	1.37106	0.627725	0.211676	0.004192				261.8	1.44561	0.632873	0.197426	-0.01015
								262	1.07111	0.435105	0.089667	-0.03844			262	1.37137	0.627808	0.211765	0.004236				262	1.44625	0.632945	0.197623	-0.01019
								262.2	1.07148	0.435314	0.089323	-0.03852			262.2	1.37155	0.628168	0.211969	0.004346				262.2	1.44664	0.633427	0.198364	-0.01003
								262.4	1.072	0.43557	0.089358	-0.03857			262.4	1.37187	0.628557	0.21202	0.004331				262.4	1.44704	0.633989	0.198875	-0.01003
								262.6	1.07261	0.435679	0.089363	-0.03823			262.6	1.372	0.628448	0.211904	0.004346				262.6	1.44762	0.634409	0.199052	-0.01014
								262.8	1.07316	0.435867	0.089245	-0.03782			262.8	1.37257	0.628494	0.212045	0.004228				262.8	1.44843	0.634786	0.199194	-0.00959
								263	1.07352	0.436097	0.089595	-0.0376			263	1.37227	0.628604	0.212528	0.004171				263	1.44886	0.635346	0.19954	-0.00926
								263.2	1.07413	0.436793	0.089462	-0.03751			263.2	1.37259	0.62888	0.212538	0.003892				263.2	1.44917	0.635413	0.200032	-0.00956
								263.4	1.0743	0.436875	0.089787	-0.03792			263.4	1.37314	0.628841	0.21288	0.004467				263.4	1.44947	0.635931	0.200715	-0.00977
								263.6	1.07518	0.437102	0.089882	-0.03739			263.6	1.37395	0.629533	0.213121	0.004569				263.6	1.44982	0.636504	0.200827	-0.00985
								263.8	1.07557	0.437088	0.090157	-0.03732			263.8	1.37422	0.629673	0.213274	0.004772				263.8	1.45005	0.636653	0.201462	-0.0099
								264	1.07601	0.437414	0.09024	-0.03701			264	1.37464	0.630123	0.213387	0.005047				264	1.45072	0.636921	0.201567	-0.00948
								264.2	1.07618	0.437447	0.089907	-0.0368			264.2	1.37525	0.630762	0.21407	0.004983				264.2	1.45081	0.637357	0.20182	-0.00937
								264.4	1.07682	0.437944	0.090446	-0.03673			264.4	1.3758	0.631665	0.214166	0.005076				264.4	1.45094	0.637563	0.201748	-0.00927
								264.6	1.07737	0.43832	0.090321	-0.0368			264.6	1.37579	0.631804	0.215056	0.005518				264.6	1.45107	0.637511	0.202106	-0.00917
								264.8	1.07793	0.438018	0.090046	-0.03695			264.8	1.37612	0.632053	0.215332	0.005821				264.8	1.4514	0.637803	0.201977	-0.00921
								265	1.07824	0.438678	0.090395	-0.03744			265	1.37693	0.632698	0.21534	0.006262				265	1.45168	0.638002	0.201995	-0.00893
								265.2	1.07858	0.439123	0.090667	-0.03783			265.2	1.37746	0.633011	0.215718	0.006422				265.2	1.45218	0.638299	0.202018	-0.00903
								265.4	1.07895	0.439428	0.090845	-0.03835			265.4	1.37822	0.632978	0.216108	0.006597				265.4	1.4531	0.638655	0.202242	-0.00897
								265.6	1.07973	0.439547	0.090882	-0.03883			265.6	1.37832	0.632924	0.21656	0.006821				265.6	1.45354	0.639067	0.202442	-0.00906
								265.8	1.08031	0.440276	0.090956	-0.03954			265.8	1.37879	0.633212	0.217289	0.006699				265.8	1.45399	0.639983	0.202711	-0.00899
								266	1.08086	0.440359	0.091013	-0.03947			266	1.37933	0.633382	0.217387	0.006845				266	1.45436	0.640581	0.202687	-0.00878
								266.2	1.08156	0.440691	0.090361	-0.039			266.2	1.37974	0.633924	0.21736	0.007262				266.2	1.45436	0.641523	0.202877	-0.00865
								266.4	1.08239	0.440699	0.090543	-0.0387			266.4	1.38083	0.633912	0.217469	0.007187				266.4	1.45505	0.642468	0.203182	-0.00902
								266.6	1.08312	0.440883	0.090593	-0.0386			266.6	1.38169	0.634517	0.217593	0.007648				266.6	1.45514	0.643496	0.203694	-0.0096
								266.8	1.08402	0.440831	0.090682	-0.03833			266.8	1.38266	0.635351	0.217651	0.007385				266.8	1.45583	0.644217	0.203965	-0.00968
								267	1.08451	0.441088	0.090994	-0.03792			267	1.38303	0.635759	0.21768	0.007579				267	1.45597	0.645122	0.204107	-0.00995
								267.2	1.08527	0.441563	0.091303	-0.03772			267.2	1.38341	0.636508	0.217388	0.007176				267.2	1.45649	0.645705	0.204543	-0.0101
								267.4	1.08538	0.441366	0.091526	-0.03754			267.4	1.38385	0.63697	0.217231	0.007364				267.4	1.4568	0.646558	0.204886	-0.00979
								267.6	1.08564	0.441572	0.09163	-0.03709			267.6	1.38462	0.637265	0.217431	0.006836				267.6	1.45755	0.646483	0.204849	-0.00989
								267.8	1.08585	0.441686	0.091802	-0.03741			267.8	1.38481	0.6374	0.217487	0.006542				267.8	1.45862	0.646599	0.204942	-0.00984
								268	1.08617	0.442472	0.091662	-0.03735			268	1.38507	0.637696	0.217578	0.006557				268	1.45908	0.646629	0.205507	-0.01012
								268.2	1.08669	0.442708	0.091533	-0.03713			268.2	1.38554	0.638153	0.217953	0.00631				268.2	1.45928	0.64757	0.20556	-0.01028
								268.4	1.0873	0.443301	0.091751	-0.03729			268.4	1.38544	0.638641	0.218429	0.006496				268.4	1.46029	0.64769	0.205626	-0.01013
								268.6	1.08809	0.443558	0.091533	-0.0372			268.6	1.38541	0.639016	0.218873	0.00623				268.6	1.46079	0.647478	0.206095	-0.01019
								268.8	1.08846	0.443788	0.091342	-0.03735			268.8	1.38557	0.639952	0.218934	0.005747				268.8	1.46172	0.647956	0.205938	-0.00995
								269	1.0889	0.444233	0.091281	-0.03771			269	1.38563	0.640491	0.219071	0.00629				269	1.46236	0.648384	0.206076	-0.00999
								269.2	1.08934	0.444671	0.090622	-0.03772			269.2	1.38538	0.640717	0.219577	0.006377				269.2	1.46306	0.648464	0.206233	-0.01036
								269.4	1.0896	0.444916	0.090326	-0.038			269.4	1.38575	0.640913	0.219917	0.006431				269.4	1.46388	0.648938	0.206555	-0.00999
								269.6	1.0901	0.445366	0.090237	-0.03783			269.6	1.38596	0.641476	0.220312	0.006768				269.6	1.46425	0.649187	0.206467	-0.00988
								269.8	1.09038	0.445395	0.090475	-0.03774			269.8	1.38661	0.641789	0.220417	0.006434				269.8	1.46487	0.648878	0.20668	-0.00976
								270	1.09034	0.445226	0.090823	-0.03747			270	1.38688	0.642032	0.220513	0.006642				270	1.46502	0.648529	0.206715	-0.01002
								270.2	1.09087	0.446031	0.091105	-0.03755			270.2	1.38719	0.642131	0.220359	0.006583				270.2	1.46524	0.649027	0.207252	-0.01007
								270.4	1.09075	0.446151	0.091316	-0.03716			270.4	1.388	0.642544	0.220582	0.006488				270.4	1.4663	0.649374	0.207743	-0.01046
								270.6	1.09055	0.446592	0.091449	-0.03698			270.6	1.38842	0.643266	0.220751	0.006843				270.6	1.4667	0.649969	0.207947	-0.01073
								270.8	1.09069	0.446802	0.091961	-0.03674			270.8	1.38914	0.643536	0.220913	0.00703				270.8	1.46709	0.650073	0.207806	-0.01018
								271	1.09064	0.447038	0.092407	-0.03622			271	1.38917	0.643578	0.220771	0.007409				271	1.46769	0.650221	0.20747	-0.00999
								271.2	1.09069	0.44697	0.092895	-0.03625			271.2	1.3892	0.644004	0.22073	0.007212				271.2	1.46806	0.650479	0.208011	-0.00954
								271.4	1.09033	0.447032	0.092996	-0.03658			271.4	1.38969	0.644312	0.220784	0.007661				271.4	1.46895	0.650629	0.208196	-0.00942
								271.6	1.0907	0.447484	0.09343	-0.03667			271.6	1.39025	0.644142	0.220644	0.00766				271.6	1.46957	0.651045	0.208592	-0.00941
								271.8	1.09101	0.447589	0.093508	-0.03672			271.8	1.39058	0.644638	0.220144	0.007439				271.8	1.46977	0.651969	0.208648	-0.00939
								272	1.09149	0.447882	0.093611	-0.03654			272	1.39135	0.644668	0.219972	0.007971				272	1.46975	0.65257	0.209321	-0.00978
								272.2	1.09167	0.448247	0.094263	-0.03612			272.2	1.39184	0.645347	0.220277	0.007997				272.2	1.4705	0.65331	0.209005	-0.00895
								272.4	1.09238	0.448819	0.094032	-0.03585			272.4	1.39229	0.645774	0.220651	0.008241				272.4	1.47137	0.653301	0.209509	-0.0086
								272.6	1.09288	0.448928	0.09407	-0.03555			272.6	1.39316	0.646509	0.220805	0.008168				272.6	1.47118	0.653464	0.209423	-0.0085
								272.8	1.09312	0.449042	0.093582	-0.03538			272.8	1.39362	0.646753	0.220772	0.008517				272.8	1.47133	0.654007	0.209566	-0.00844
								273	1.09326	0.448947	0.093283	-0.03553			273	1.39393	0.647421	0.221034	0.008612				273	1.47144	0.654295	0.209591	-0.00858
								273.2	1.0937	0.449267	0.092668	-0.0357			273.2	1.39461	0.647983	0.221706	0.008203				273.2	1.4714	0.654347	0.209604	-0.008
								273.4	1.09378	0.449925	0.093002	-0.03573			273.4	1.3954	0.648557	0.222384	0.008153				273.4	1.47194	0.654883	0.210286	-0.00753
								273.6	1.09403	0.449934	0.093557	-0.03547			273.6	1.39569	0.649332	0.222945	0.008216				273.6	1.47175	0.655244	0.210728	-0.00774
								273.8	1.09416	0.449913	0.094027	-0.03556			273.8	1.39563	0.64939	0.223119	0.008029				273.8	1.47203	0.654999	0.211132	-0.00771
								274	1.09451	0.450442	0.094183	-0.03588			274	1.39579	0.649471	0.223981	0.007852				274	1.47183	0.655874	0.211547	-0.00756
								274.2	1.09453	0.451341	0.094435	-0.03607			274.2	1.39604	0.649739	0.224765	0.007466				274.2	1.47237	0.656615	0.212375	-0.00715
								274.4	1.09477	0.451581	0.094064	-0.03581			274.4	1.39667	0.650246	0.225503	0.007587				274.4	1.47334	0.656904	0.211836	-0.00746
								274.6	1.09502	0.45187	0.09423	-0.0366			274.6	1.39716	0.650651	0.225717	0.00773				274.6	1.47375	0.657646	0.211632	-0.00789
								274.8	1.09585	0.452233	0.094375	-0.03692			274.8	1.39758	0.651242	0.226232	0.00776				274.8	1.47407	0.658235	0.211274	-0.00761
								275	1.09632	0.452334	0.094429	-0.03716			275	1.39796	0.651258	0.226641	0.007684				275	1.47515	0.658655	0.21127	-0.00772
								275.2	1.09675	0.452604	0.094481	-0.03798			275.2	1.39822	0.651549	0.227234	0.007734				275.2	1.47553	0.659295	0.211704	-0.00779
								275.4	1.09712	0.452848	0.094708	-0.03837			275.4	1.39843	0.651443	0.227774	0.008136				275.4	1.47673	0.659653	0.211375	-0.00819
								275.6	1.09765	0.453287	0.0949	-0.03837			275.6	1.39878	0.651249	0.227433	0.008188				275.6	1.4771	0.660393	0.211227	-0.00857
								275.8	1.09816	0.453133	0.094944	-0.03859			275.8	1.39939	0.651437	0.227729	0.008415				275.8	1.47771	0.660834	0.211285	-0.00906
								276	1.09904	0.453449	0.095227	-0.03827			276	1.39974	0.651195	0.227707	0.009064				276	1.47829	0.660833	0.211561	-0.00922
								276.2	1.09981	0.453797	0.095637	-0.03791			276.2	1.40004	0.65145	0.22802	0.009092				276.2	1.47857	0.660841	0.211128	-0.00901
								276.4	1.10121	0.454207	0.095354	-0.03773			276.4	1.4007	0.651464	0.228028	0.009474				276.4	1.47894	0.660615	0.211264	-0.00919
								276.6	1.10168	0.454421	0.095633	-0.0378			276.6	1.40143	0.6521	0.228154	0.009958				276.6	1.47877	0.660283	0.210945	-0.00883
								276.8	1.1021	0.454547	0.095654	-0.0375			276.8	1.40196	0.652589	0.22775	0.01047				276.8	1.47918	0.660699	0.211345	-0.00896
								277	1.10278	0.454448	0.095838	-0.0378			277	1.40238	0.653063	0.227642	0.01021				277	1.47943	0.661111	0.211316	-0.00855
								277.2	1.10352	0.454706	0.095966	-0.03809			277.2	1.4025	0.65348	0.22788	0.010598				277.2	1.4799	0.661619	0.211514	-0.00823
								277.4	1.10396	0.455102	0.096269	-0.03768			277.4	1.40289	0.653953	0.227765	0.010766				277.4	1.48028	0.66279	0.212079	-0.00833
								277.6	1.10447	0.455067	0.096754	-0.03771			277.6	1.40291	0.654281	0.227553	0.010807				277.6	1.48032	0.663307	0.212701	-0.00835
								277.8	1.10473	0.455693	0.09675	-0.03766			277.8	1.40318	0.65476	0.227352	0.010646				277.8	1.48076	0.664128	0.212928	-0.00845
								278	1.10504	0.456203	0.096849	-0.0377			278	1.40401	0.655031	0.227715	0.010592				278	1.48083	0.665281	0.213198	-0.00799
								278.2	1.10506	0.456727	0.097208	-0.03765			278.2	1.40436	0.655552	0.227555	0.010234				278.2	1.48142	0.665445	0.213576	-0.00798
								278.4	1.10513	0.457303	0.096784	-0.03742			278.4	1.40499	0.655991	0.227243	0.009841				278.4	1.48191	0.665979	0.213317	-0.00798
								278.6	1.10512	0.457811	0.096736	-0.0378			278.6	1.40524	0.656847	0.226709	0.009593				278.6	1.48255	0.666557	0.213734	-0.00786
								278.8	1.10551	0.45836	0.096805	-0.03752			278.8	1.40558	0.657166	0.22687	0.00939				278.8	1.48287	0.667169	0.213849	-0.00759
								279	1.10541	0.458881	0.096846	-0.03768			279	1.40609	0.657097	0.227064	0.009172				279	1.48412	0.667497	0.214554	-0.00783
								279.2	1.10561	0.458977	0.09649	-0.03772			279.2	1.40627	0.657321	0.227195	0.009181				279.2	1.4847	0.667976	0.214476	-0.00782
								279.4	1.10541	0.459208	0.096689	-0.03739			279.4	1.40647	0.657751	0.227065	0.009209				279.4	1.48535	0.668337	0.21453	-0.00813
								279.6	1.10559	0.459897	0.096697	-0.03748			279.6	1.40691	0.657592	0.227266	0.009148				279.6	1.48581	0.668845	0.214509	-0.0084
								279.8	1.10589	0.459956	0.096978	-0.03718			279.8	1.40732	0.658186	0.227431	0.009027				279.8	1.48612	0.669334	0.215152	-0.00835
								280	1.10654	0.460452	0.096422	-0.03639			280	1.40752	0.658845	0.227709	0.009032				280	1.48647	0.669323	0.215558	-0.008
								280.2	1.10706	0.460793	0.096645	-0.03615			280.2	1.40811	0.659538	0.228196	0.009347				280.2	1.48679	0.669622	0.215897	-0.00774
								280.4	1.10742	0.46115	0.09665	-0.03599			280.4	1.40863	0.659814	0.228401	0.010098				280.4	1.48758	0.669853	0.216267	-0.0071
								280.6	1.10753	0.461713	0.097153	-0.03572			280.6	1.40907	0.660469	0.228652	0.010399				280.6	1.4883	0.670191	0.216391	-0.00677
								280.8	1.10799	0.461479	0.097119	-0.03533			280.8	1.41016	0.660527	0.228601	0.010648				280.8	1.48908	0.670754	0.216652	-0.0067
								281	1.10844	0.461572	0.097131	-0.03581			281	1.4105	0.660362	0.228563	0.010823				281	1.4895	0.670809	0.216448	-0.00675
								281.2	1.10877	0.461779	0.097785	-0.03583			281.2	1.41123	0.660903	0.229169	0.011002				281.2	1.49011	0.671426	0.216829	-0.00657
								281.4	1.10933	0.461783	0.098215	-0.03548			281.4	1.4118	0.661502	0.229448	0.011135				281.4	1.49021	0.672407	0.217047	-0.00652
								281.6	1.10966	0.462053	0.098403	-0.03583			281.6	1.41214	0.661715	0.229808	0.011112				281.6	1.49091	0.672601	0.217348	-0.00629
								281.8	1.11003	0.46182	0.098347	-0.0357			281.8	1.41261	0.662377	0.230103	0.010952				281.8	1.49163	0.672798	0.217337	-0.00671
								282	1.11049	0.461683	0.098779	-0.03598			282	1.41278	0.662691	0.230504	0.011013				282	1.49169	0.672942	0.217528	-0.0063
								282.2	1.11097	0.461406	0.099417	-0.03621			282.2	1.41298	0.662895	0.230671	0.010678				282.2	1.49212	0.673014	0.217966	-0.00628
								282.4	1.11123	0.461463	0.099103	-0.03616			282.4	1.41365	0.663158	0.230877	0.00993				282.4	1.49299	0.673466	0.218186	-0.00635
								282.6	1.11167	0.461368	0.099391	-0.03617			282.6	1.41371	0.663514	0.230816	0.009793				282.6	1.49352	0.673367	0.218193	-0.00622
								282.8	1.11223	0.461339	0.099404	-0.03575			282.8	1.41425	0.663505	0.231286	0.009798				282.8	1.49368	0.673806	0.218225	-0.00638
								283	1.11261	0.461307	0.099377	-0.0358			283	1.41479	0.663713	0.231553	0.009498				283	1.49479	0.673895	0.218584	-0.00648
								283.2	1.11301	0.461206	0.099469	-0.03572			283.2	1.41534	0.663865	0.231775	0.009142				283.2	1.49494	0.674241	0.218817	-0.00651
								283.4	1.11275	0.461353	0.099787	-0.03595			283.4	1.41521	0.664294	0.232323	0.008953				283.4	1.49531	0.67431	0.218988	-0.00674
								283.6	1.11311	0.4622	0.09966	-0.0357			283.6	1.41515	0.664134	0.232883	0.008827				283.6	1.4955	0.674617	0.219103	-0.00673
								283.8	1.11328	0.462762	0.099438	-0.03539			283.8	1.4154	0.664898	0.232732	0.008784				283.8	1.49598	0.674998	0.219768	-0.0065
								284	1.11332	0.463029	0.098973	-0.03551			284	1.41595	0.665438	0.233114	0.009011				284	1.49681	0.674866	0.22024	-0.00646
								284.2	1.11327	0.463225	0.099261	-0.03573			284.2	1.41588	0.665667	0.233366	0.009502				284.2	1.49744	0.675673	0.220783	-0.0066
								284.4	1.1132	0.463916	0.099254	-0.03586			284.4	1.41639	0.665979	0.233298	0.009343				284.4	1.49814	0.67577	0.220814	-0.00659
								284.6	1.11327	0.464891	0.099511	-0.03602			284.6	1.41673	0.666693	0.233657	0.009349				284.6	1.49848	0.675946	0.221187	-0.00679
								284.8	1.1134	0.465268	0.0995	-0.03633			284.8	1.41758	0.666718	0.23369	0.009752				284.8	1.49858	0.676285	0.221368	-0.00665
								285	1.11322	0.46602	0.099978	-0.03687			285	1.4178	0.667218	0.23359	0.010066				285	1.49866	0.676913	0.221422	-0.00674
								285.2	1.11352	0.466503	0.100436	-0.03686			285.2	1.41819	0.66751	0.233801	0.010249				285.2	1.49921	0.677851	0.222112	-0.0062
								285.4	1.11398	0.46673	0.100741	-0.03728			285.4	1.4184	0.668144	0.233878	0.010983				285.4	1.49943	0.678253	0.221756	-0.00607
								285.6	1.11439	0.467095	0.100445	-0.03758			285.6	1.41915	0.668496	0.233765	0.010994				285.6	1.50028	0.678469	0.221846	-0.00607
								285.8	1.11518	0.467237	0.10045	-0.03744			285.8	1.41987	0.669159	0.233405	0.011042				285.8	1.50026	0.679256	0.221826	-0.00639
								286	1.11574	0.46762	0.100931	-0.03791			286	1.42038	0.669712	0.23342	0.011482				286	1.49998	0.68029	0.221815	-0.00658
								286.2	1.11659	0.467827	0.101603	-0.03778			286.2	1.42079	0.670236	0.233382	0.011353				286.2	1.5002	0.681248	0.221939	-0.00668
								286.4	1.11763	0.468089	0.101365	-0.0372			286.4	1.42181	0.670602	0.233496	0.01139				286.4	1.50056	0.681415	0.221895	-0.00709
								286.6	1.11838	0.468251	0.101496	-0.03695			286.6	1.42213	0.67099	0.233893	0.01149				286.6	1.50034	0.681489	0.221918	-0.00679
								286.8	1.11918	0.468711	0.101312	-0.03647			286.8	1.42299	0.671172	0.233789	0.012119				286.8	1.50066	0.681814	0.222099	-0.00703
								287	1.11983	0.468802	0.101413	-0.03606			287	1.42364	0.671258	0.233948	0.012106				287	1.5013	0.681253	0.222095	-0.00689
								287.2	1.12013	0.468609	0.101511	-0.03589			287.2	1.42403	0.671939	0.233714	0.012228				287.2	1.50146	0.681618	0.22233	-0.0069
								287.4	1.12043	0.468861	0.101254	-0.03585			287.4	1.42403	0.672057	0.23373	0.012619				287.4	1.50191	0.681759	0.222263	-0.00683
								287.6	1.12076	0.469244	0.101479	-0.03528			287.6	1.42396	0.672654	0.233964	0.012411				287.6	1.50234	0.682231	0.222166	-0.0068
								287.8	1.1213	0.469053	0.101303	-0.03555			287.8	1.42453	0.673232	0.233807	0.012265				287.8	1.50312	0.682604	0.222758	-0.00658
								288	1.12185	0.469222	0.101129	-0.03542			288	1.42522	0.673651	0.2341	0.012282				288	1.50392	0.682611	0.222949	-0.00664
								288.2	1.12212	0.469164	0.100953	-0.03537			288.2	1.425	0.673832	0.23454	0.012176				288.2	1.50457	0.682968	0.223233	-0.00666
								288.4	1.12238	0.469738	0.101061	-0.03548			288.4	1.42526	0.674561	0.234536	0.01218				288.4	1.50487	0.682809	0.223147	-0.00638
								288.6	1.12211	0.47013	0.101298	-0.03538			288.6	1.42525	0.674812	0.234887	0.012192				288.6	1.50583	0.682935	0.223102	-0.00588
								288.8	1.12222	0.470544	0.101028	-0.03529			288.8	1.42553	0.67497	0.234855	0.012095				288.8	1.50637	0.683425	0.223107	-0.00581
								289	1.12189	0.470791	0.101217	-0.03521			289	1.42596	0.675158	0.235239	0.012204				289	1.50708	0.683401	0.223146	-0.00543
								289.2	1.12212	0.471361	0.10151	-0.03554			289.2	1.42604	0.675204	0.23569	0.012552				289.2	1.50745	0.683861	0.223215	-0.00515
								289.4	1.12228	0.471196	0.101985	-0.03549			289.4	1.42678	0.67564	0.235929	0.012932				289.4	1.50791	0.683886	0.223088	-0.00498
								289.6	1.12273	0.471067	0.101546	-0.03553			289.6	1.42753	0.675631	0.236114	0.012978				289.6	1.50839	0.684316	0.223286	-0.00491
								289.8	1.12338	0.471085	0.101932	-0.0356			289.8	1.42813	0.675959	0.236086	0.012859				289.8	1.5087	0.685195	0.223106	-0.00498
								290	1.12361	0.470989	0.102589	-0.03555			290	1.428	0.676563	0.236487	0.013459				290	1.50875	0.685647	0.223212	-0.00546
								290.2	1.12417	0.471367	0.103491	-0.03565			290.2	1.42797	0.677005	0.23717	0.013369				290.2	1.509	0.685773	0.223432	-0.00517
								290.4	1.12487	0.471538	0.103624	-0.03588			290.4	1.4285	0.67682	0.237843	0.013702				290.4	1.50973	0.686247	0.223632	-0.00501
								290.6	1.12498	0.471742	0.103967	-0.03585			290.6	1.42852	0.676791	0.238339	0.013764				290.6	1.51032	0.686977	0.223644	-0.00489
								290.8	1.12502	0.472298	0.104092	-0.03609			290.8	1.42923	0.676535	0.238013	0.014354				290.8	1.51126	0.687495	0.223753	-0.00505
								291	1.12523	0.472363	0.10453	-0.0361			291	1.42977	0.676769	0.238408	0.014046				291	1.51175	0.688051	0.224	-0.00498
								291.2	1.12524	0.472868	0.104763	-0.03637			291.2	1.4301	0.677551	0.23871	0.013472				291.2	1.51238	0.689499	0.224512	-0.00512
								291.4	1.12534	0.473308	0.104999	-0.03641			291.4	1.43038	0.677295	0.238983	0.013068				291.4	1.51299	0.690293	0.22516	-0.005
								291.6	1.12545	0.473632	0.105159	-0.03641			291.6	1.43042	0.678008	0.23928	0.012776				291.6	1.51334	0.690689	0.225337	-0.00531
								291.8	1.12618	0.47409	0.104958	-0.03669			291.8	1.43073	0.677875	0.23942	0.012456				291.8	1.51372	0.691226	0.226111	-0.00496
								292	1.1262	0.474614	0.105207	-0.03637			292	1.4314	0.678179	0.239878	0.012299				292	1.51405	0.691636	0.226112	-0.00525
								292.2	1.12636	0.474933	0.104985	-0.03683			292.2	1.43167	0.678573	0.239967	0.012029				292.2	1.51453	0.691611	0.226227	-0.00538
								292.4	1.12668	0.475751	0.104886	-0.03673			292.4	1.43197	0.6792	0.239997	0.011833				292.4	1.51523	0.692356	0.226333	-0.00501
								292.6	1.1266	0.476251	0.104656	-0.03651			292.6	1.43267	0.679413	0.240243	0.011337				292.6	1.51601	0.69268	0.226604	-0.00532
								292.8	1.12679	0.476856	0.10433	-0.03673			292.8	1.43297	0.680208	0.240283	0.011349				292.8	1.51625	0.693452	0.22715	-0.00547
								293	1.12676	0.477213	0.104257	-0.03649			293	1.43363	0.680571	0.240722	0.011567				293	1.51666	0.693552	0.227536	-0.00499
								293.2	1.12728	0.477026	0.10413	-0.03639			293.2	1.43406	0.681336	0.240838	0.011704				293.2	1.51654	0.694415	0.227952	-0.00528
								293.4	1.1274	0.476597	0.103565	-0.03609			293.4	1.43439	0.682106	0.240531	0.011839				293.4	1.51705	0.694055	0.228573	-0.00529
								293.6	1.12807	0.476621	0.102738	-0.03626			293.6	1.4348	0.682316	0.240799	0.012175				293.6	1.51703	0.693857	0.228723	-0.00525
								293.8	1.12851	0.476934	0.102719	-0.03587			293.8	1.43497	0.682975	0.240297	0.012455				293.8	1.51725	0.693819	0.22884	-0.00518
								294	1.12893	0.477064	0.10283	-0.03573			294	1.43497	0.683837	0.240666	0.013085				294	1.51696	0.693738	0.228678	-0.0053
								294.2	1.12966	0.477752	0.102992	-0.03555			294.2	1.43528	0.684335	0.241101	0.013399				294.2	1.51734	0.693492	0.228244	-0.00474
								294.4	1.1303	0.478216	0.10308	-0.03503			294.4	1.43521	0.684851	0.241264	0.013498				294.4	1.51799	0.694165	0.228306	-0.00461
								294.6	1.13053	0.478649	0.102838	-0.03493			294.6	1.43562	0.685039	0.241618	0.013274				294.6	1.51837	0.694532	0.228223	-0.00502
								294.8	1.13086	0.479251	0.10296	-0.03531			294.8	1.43654	0.685693	0.241781	0.013326				294.8	1.51874	0.694806	0.228415	-0.00523
								295	1.13182	0.47981	0.102995	-0.03554			295	1.43685	0.686401	0.241823	0.013355				295	1.51906	0.695392	0.229012	-0.00515
								295.2	1.13223	0.480034	0.103243	-0.03536			295.2	1.43684	0.686978	0.241792	0.013273				295.2	1.51973	0.695981	0.229433	-0.00536
								295.4	1.13252	0.480045	0.103617	-0.03551			295.4	1.43678	0.686996	0.241856	0.013576				295.4	1.52018	0.695908	0.229756	-0.00522
								295.6	1.13298	0.480297	0.103943	-0.03557			295.6	1.43668	0.687532	0.242285	0.013746				295.6	1.52037	0.696063	0.22976	-0.00534
								295.8	1.13357	0.480577	0.104489	-0.03565			295.8	1.43676	0.6874	0.242672	0.013504				295.8	1.52111	0.69674	0.230036	-0.00462
								296	1.13395	0.480901	0.104928	-0.03576			296	1.437	0.687766	0.242601	0.013697				296	1.52187	0.697202	0.230366	-0.00462
								296.2	1.13482	0.481353	0.105278	-0.03638			296.2	1.43712	0.687754	0.242763	0.013746				296.2	1.52255	0.697244	0.230833	-0.00454
								296.4	1.13497	0.481522	0.106061	-0.03641			296.4	1.43744	0.687916	0.242931	0.014147				296.4	1.52361	0.698178	0.230973	-0.00415
								296.6	1.13502	0.482012	0.106322	-0.03677			296.6	1.43772	0.688272	0.242769	0.014441				296.6	1.52428	0.698453	0.231196	-0.00424
								296.8	1.13468	0.482344	0.106796	-0.03676			296.8	1.4379	0.688599	0.242528	0.014637				296.8	1.52503	0.699151	0.231813	-0.00375
								297	1.13476	0.482485	0.106604	-0.03654			297	1.43836	0.688653	0.242693	0.014843				297	1.5256	0.699735	0.232318	-0.0038
								297.2	1.13485	0.482369	0.106618	-0.03676			297.2	1.43858	0.689024	0.243032	0.015236				297.2	1.52585	0.700025	0.23301	-0.00368
								297.4	1.13499	0.482957	0.106407	-0.03675			297.4	1.43873	0.688976	0.243282	0.015524				297.4	1.52635	0.699554	0.233097	-0.0035
								297.6	1.13556	0.483113	0.105973	-0.03682			297.6	1.43938	0.688803	0.244109	0.015582				297.6	1.5268	0.699515	0.232705	-0.00292
								297.8	1.13585	0.483395	0.105924	-0.03687			297.8	1.43957	0.689024	0.244026	0.015647				297.8	1.52668	0.699622	0.23238	-0.00255
								298	1.13621	0.483638	0.105711	-0.0366			298	1.44015	0.689647	0.244484	0.015775				298	1.52698	0.699746	0.231905	-0.00223
								298.2	1.13679	0.484177	0.105551	-0.03622			298.2	1.44069	0.6895	0.245012	0.016017				298.2	1.52738	0.699919	0.231684	-0.00171
								298.4	1.13696	0.484563	0.105595	-0.03632			298.4	1.44078	0.689841	0.245011	0.015869				298.4	1.5279	0.700588	0.232052	-0.00211
								298.6	1.1374	0.484697	0.105202	-0.03679			298.6	1.44179	0.689813	0.244969	0.015471				298.6	1.52796	0.701726	0.232035	-0.00247
								298.8	1.13778	0.484416	0.105028	-0.03689			298.8	1.44258	0.690596	0.245126	0.015489				298.8	1.52791	0.702267	0.232173	-0.00284
								299	1.13856	0.4849	0.105175	-0.03743			299	1.44298	0.691136	0.245208	0.015257				299	1.528	0.703114	0.232732	-0.00277
								299.2	1.13911	0.484416	0.105116	-0.03703			299.2	1.44306	0.691945	0.245878	0.014873				299.2	1.52819	0.703982	0.232983	-0.00277
								299.4	1.13938	0.484701	0.105149	-0.03699			299.4	1.44341	0.692335	0.246773	0.01467				299.4	1.52869	0.704387	0.232937	-0.00278
								299.6	1.13978	0.48463	0.105678	-0.03661			299.6	1.44336	0.692707	0.247406	0.01414				299.6	1.52893	0.704818	0.233114	-0.00295
								299.8	1.14024	0.484789	0.106208	-0.03685			299.8	1.44365	0.693045	0.247713	0.013762				299.8	1.5293	0.705251	0.233832	-0.00325
								300	1.14031	0.484529	0.107036	-0.03689			300	1.44366	0.693338	0.247844	0.013569				300	1.52958	0.705348	0.234192	-0.00332
								300.2	1.14057	0.484656	0.10753	-0.0369			300.2	1.44407	0.693466	0.248196	0.013603				300.2	1.52997	0.70573	0.234487	-0.00344
								300.4	1.14026	0.484806	0.108169	-0.0369			300.4	1.44424	0.694271	0.248388	0.013524				300.4	1.53064	0.706201	0.234414	-0.0036
								300.6	1.14004	0.485256	0.10822	-0.03671			300.6	1.44462	0.694695	0.248028	0.013455				300.6	1.53101	0.70651	0.234901	-0.00414
								300.8	1.1399	0.485584	0.108676	-0.03592			300.8	1.44519	0.694903	0.248013	0.013967				300.8	1.53151	0.707273	0.235306	-0.00459
								301	1.14006	0.485899	0.108554	-0.03554			301	1.44545	0.695295	0.248409	0.014292				301	1.53226	0.707878	0.235032	-0.00479
								301.2	1.14056	0.486057	0.108833	-0.03516			301.2	1.44574	0.69572	0.248862	0.014654				301.2	1.53259	0.707957	0.2346	-0.00474
								301.4	1.14087	0.486283	0.109343	-0.03476			301.4	1.44622	0.696214	0.24865	0.014992				301.4	1.53281	0.708159	0.234468	-0.0048
								301.6	1.1416	0.486582	0.109272	-0.03489			301.6	1.4462	0.696839	0.248418	0.01509				301.6	1.53314	0.708287	0.234271	-0.00399
								301.8	1.14183	0.487489	0.109381	-0.03457			301.8	1.44625	0.69715	0.247552	0.015639				301.8	1.53333	0.708187	0.234372	-0.00357
								302	1.14223	0.488041	0.109064	-0.03437			302	1.44688	0.697552	0.246787	0.015638				302	1.5337	0.708407	0.234321	-0.00332
								302.2	1.14296	0.488755	0.109052	-0.03442			302.2	1.44757	0.697496	0.246241	0.015937				302.2	1.5342	0.708746	0.234046	-0.00316
								302.4	1.14342	0.489044	0.108933	-0.03471			302.4	1.4482	0.697997	0.246107	0.015541				302.4	1.53494	0.708765	0.234159	-0.003
								302.6	1.14442	0.489175	0.108944	-0.0348			302.6	1.44908	0.698352	0.246084	0.01484				302.6	1.53506	0.709616	0.233998	-0.00294
								302.8	1.14492	0.489338	0.108637	-0.03491			302.8	1.4496	0.698911	0.246738	0.0153				302.8	1.53516	0.709403	0.23402	-0.00237
								303	1.14579	0.48974	0.10907	-0.03516			303	1.4503	0.699661	0.246942	0.015168				303	1.5354	0.710014	0.234542	-0.00183
								303.2	1.14665	0.489279	0.108809	-0.03478			303.2	1.45046	0.700271	0.24709	0.01482				303.2	1.53617	0.70986	0.234967	-0.00162
								303.4	1.14703	0.489689	0.10932	-0.03477			303.4	1.451	0.699835	0.247212	0.014672				303.4	1.5369	0.70997	0.234707	-0.00146
								303.6	1.14749	0.489409	0.10926	-0.03511			303.6	1.45187	0.700323	0.247861	0.014551				303.6	1.53742	0.709895	0.23507	-0.00121
								303.8	1.14786	0.489501	0.109081	-0.03526			303.8	1.45294	0.700376	0.248532	0.014647				303.8	1.53766	0.710229	0.235407	-0.00127
								304	1.14828	0.489748	0.109167	-0.03494			304	1.45317	0.700443	0.249346	0.01488				304	1.53823	0.710427	0.235286	-0.00087
								304.2	1.14827	0.490048	0.108584	-0.03517			304.2	1.45392	0.700839	0.250077	0.015058				304.2	1.53893	0.711153	0.235793	-0.00115
								304.4	1.14791	0.489997	0.108667	-0.03487			304.4	1.45408	0.701362	0.250685	0.014813				304.4	1.53899	0.711429	0.236186	-0.00139
								304.6	1.1479	0.490128	0.108105	-0.03423			304.6	1.45457	0.70155	0.250821	0.01562				304.6	1.53947	0.712146	0.236472	-0.00161
								304.8	1.14831	0.490436	0.108415	-0.03371			304.8	1.45473	0.701555	0.251141	0.015963				304.8	1.53964	0.71279	0.236313	-0.00188
								305	1.1483	0.490454	0.108495	-0.03351			305	1.45487	0.702043	0.252029	0.016372				305	1.54013	0.713215	0.235993	-0.00172
								305.2	1.14888	0.490782	0.108646	-0.0333			305.2	1.455	0.702563	0.252129	0.016903				305.2	1.54014	0.713433	0.236015	-0.00164
								305.4	1.14905	0.491067	0.109135	-0.03299			305.4	1.45488	0.702949	0.252403	0.017454				305.4	1.53998	0.71371	0.236319	-0.0015
								305.6	1.14965	0.49192	0.109032	-0.03291			305.6	1.45469	0.702993	0.252403	0.016985				305.6	1.54027	0.713877	0.236416	-0.00127
								305.8	1.14961	0.492447	0.109378	-0.03279			305.8	1.45484	0.703278	0.252512	0.016824				305.8	1.54032	0.714154	0.236725	-0.00166
								306	1.15011	0.492571	0.109534	-0.03325			306	1.45512	0.70358	0.252831	0.016426				306	1.54049	0.714885	0.236519	-0.00174
								306.2	1.15064	0.493186	0.109795	-0.0334			306.2	1.4551	0.703864	0.253145	0.016861				306.2	1.54121	0.715152	0.236669	-0.00189
								306.4	1.151	0.493031	0.110241	-0.03373			306.4	1.45498	0.704281	0.253562	0.016583				306.4	1.5412	0.715567	0.23698	-0.0017
								306.6	1.15154	0.493328	0.110988	-0.03359			306.6	1.45483	0.704766	0.253544	0.016615				306.6	1.54085	0.716438	0.236881	-0.00189
								306.8	1.15163	0.49358	0.111371	-0.03384			306.8	1.45496	0.705087	0.253555	0.016768				306.8	1.54106	0.716324	0.237258	-0.00171
								307	1.15219	0.493579	0.111731	-0.03394			307	1.45526	0.705624	0.253298	0.016287				307	1.54161	0.716951	0.237753	-0.00209
								307.2	1.15245	0.493836	0.111705	-0.0341			307.2	1.45536	0.705833	0.253051	0.016471				307.2	1.54242	0.716969	0.237408	-0.00234
								307.4	1.15264	0.494285	0.111689	-0.03441			307.4	1.45619	0.706135	0.253475	0.016279				307.4	1.54291	0.717525	0.237446	-0.00178
								307.6	1.15302	0.494469	0.111387	-0.03457			307.6	1.45696	0.706944	0.253958	0.01614				307.6	1.54347	0.717856	0.23793	-0.00172
								307.8	1.15316	0.49488	0.111612	-0.03461			307.8	1.45714	0.707237	0.254535	0.016138				307.8	1.54409	0.718537	0.238196	-0.00164
								308	1.15326	0.495273	0.111891	-0.03491			308	1.45769	0.707528	0.254272	0.016303				308	1.54485	0.718894	0.238819	-0.00157
								308.2	1.15303	0.49529	0.111826	-0.03518			308.2	1.45803	0.708072	0.254128	0.016332				308.2	1.54581	0.719561	0.239672	-0.00162
								308.4	1.15325	0.495877	0.111656	-0.03504			308.4	1.4582	0.707844	0.254055	0.016109				308.4	1.54636	0.720125	0.239864	-0.00123
								308.6	1.15347	0.496374	0.11108	-0.03498			308.6	1.45857	0.708432	0.253897	0.016258				308.6	1.54677	0.720574	0.240341	-0.00159
								308.8	1.15401	0.496742	0.111415	-0.0352			308.8	1.45884	0.70849	0.253866	0.016016				308.8	1.54711	0.720696	0.240491	-0.00165
								309	1.15416	0.497167	0.110831	-0.03552			309	1.45957	0.708612	0.25448	0.016023				309	1.54769	0.721262	0.240899	-0.00143
								309.2	1.15474	0.497596	0.110567	-0.03546			309.2	1.45989	0.708615	0.254573	0.015949				309.2	1.5477	0.721439	0.241634	-0.00133
								309.4	1.15507	0.497587	0.110985	-0.03556			309.4	1.45987	0.708795	0.255125	0.01596				309.4	1.54811	0.722024	0.242091	-0.00139
								309.6	1.15513	0.497786	0.110761	-0.0357			309.6	1.46038	0.709024	0.25521	0.015841				309.6	1.54855	0.722421	0.242466	-0.00115
								309.8	1.15502	0.498055	0.111118	-0.0356			309.8	1.46104	0.709565	0.255287	0.015901				309.8	1.54896	0.723055	0.242508	-0.00122
								310	1.15515	0.49833	0.111063	-0.03583			310	1.46149	0.709927	0.255465	0.015998				310	1.54959	0.723193	0.242614	-0.00115
								310.2	1.1557	0.498494	0.111282	-0.0359			310.2	1.4618	0.71009	0.255209	0.016363				310.2	1.54996	0.723326	0.24306	-0.00119
								310.4	1.15558	0.498501	0.112113	-0.03568			310.4	1.46188	0.710252	0.255171	0.016478				310.4	1.55016	0.723686	0.242823	-0.00113
								310.6	1.15573	0.498773	0.112166	-0.03547			310.6	1.46202	0.710187	0.255282	0.01677				310.6	1.55069	0.723897	0.242556	-0.00147
								310.8	1.1559	0.498738	0.112435	-0.03558			310.8	1.46216	0.710594	0.255429	0.016979				310.8	1.55129	0.72373	0.242466	-0.00157
								311	1.15586	0.498944	0.11205	-0.0353			311	1.46237	0.710672	0.255461	0.017566				311	1.55227	0.724648	0.242309	-0.0013
								311.2	1.15622	0.499304	0.112148	-0.03534			311.2	1.46231	0.711343	0.255565	0.018083				311.2	1.55286	0.724391	0.241942	-0.0009
								311.4	1.15666	0.49938	0.111983	-0.03527			311.4	1.46218	0.712081	0.255894	0.017663				311.4	1.55316	0.724502	0.242491	-0.0005
								311.6	1.15699	0.499808	0.112355	-0.03557			311.6	1.46244	0.712094	0.255889	0.018291				311.6	1.5535	0.724553	0.242488	-0.00039
								311.8	1.15717	0.500284	0.112644	-0.03595			311.8	1.46298	0.712368	0.256125	0.018647				311.8	1.55402	0.725157	0.242449	-0.00046
								312	1.15783	0.500731	0.112812	-0.03616			312	1.46383	0.712558	0.256056	0.018902				312	1.55479	0.725301	0.242495	-0.00107
								312.2	1.15815	0.501342	0.112872	-0.03617			312.2	1.46359	0.713544	0.256522	0.018851				312.2	1.55566	0.725682	0.242454	-0.00108
								312.4	1.15885	0.50233	0.112672	-0.03594			312.4	1.46427	0.713619	0.256508	0.018566				312.4	1.55595	0.725896	0.242131	-0.00086
								312.6	1.15926	0.502533	0.112398	-0.03566			312.6	1.4645	0.714727	0.256521	0.019156				312.6	1.55614	0.726497	0.242601	-0.00114
								312.8	1.16013	0.502637	0.112737	-0.0359			312.8	1.46507	0.7148	0.256806	0.019163				312.8	1.55626	0.726961	0.242517	-0.00109
								313	1.16049	0.503017	0.112488	-0.03572			313	1.46595	0.714957	0.257278	0.019086				313	1.55629	0.727338	0.242995	-0.00115
								313.2	1.16073	0.502508	0.112632	-0.03524			313.2	1.46568	0.715726	0.257899	0.019513				313.2	1.55639	0.727879	0.243429	-0.00077
								313.4	1.16111	0.502675	0.112869	-0.0353			313.4	1.46618	0.716647	0.258248	0.019791				313.4	1.55723	0.728691	0.243617	-0.00051
								313.6	1.16108	0.502362	0.112891	-0.03506			313.6	1.46695	0.716828	0.258302	0.019817				313.6	1.5574	0.729086	0.243984	-0.00032
								313.8	1.16139	0.50242	0.113235	-0.03491			313.8	1.46776	0.717541	0.258293	0.019576				313.8	1.55779	0.729079	0.244532	-0.00056
								314	1.16193	0.502208	0.113056	-0.03532			314	1.46749	0.717568	0.258382	0.019649				314	1.5581	0.728843	0.24487	-0.00085
								314.2	1.16248	0.502251	0.113407	-0.03499			314.2	1.46779	0.717697	0.258504	0.019726				314.2	1.5589	0.729134	0.24523	-0.0006
								314.4	1.1624	0.502561	0.113355	-0.03484			314.4	1.46801	0.717578	0.258798	0.019888				314.4	1.5598	0.729675	0.245253	-0.00074
								314.6	1.16274	0.502611	0.113167	-0.03484			314.6	1.46823	0.717628	0.258999	0.01998				314.6	1.56025	0.730024	0.245607	-0.00076
								314.8	1.16288	0.502724	0.113822	-0.03479			314.8	1.46826	0.718085	0.259375	0.019566				314.8	1.56083	0.730325	0.246132	-0.00054
								315	1.16316	0.503024	0.113609	-0.03477			315	1.46868	0.718041	0.259114	0.019761				315	1.56194	0.73133	0.246173	-0.00031
								315.2	1.16393	0.503154	0.113649	-0.03491			315.2	1.46879	0.718553	0.259574	0.019444				315.2	1.56239	0.731182	0.246659	-0.0003
								315.4	1.16393	0.503509	0.113879	-0.03553			315.4	1.46945	0.718428	0.259705	0.019096				315.4	1.56273	0.731766	0.247151	-0.0006
								315.6	1.16396	0.504029	0.114334	-0.03607			315.6	1.47053	0.718246	0.259757	0.01868				315.6	1.56284	0.731987	0.247188	-0.00069
								315.8	1.16406	0.504426	0.114189	-0.03609			315.8	1.47125	0.718397	0.259893	0.017543				315.8	1.56299	0.73287	0.247206	-0.00097
								316	1.16463	0.504793	0.114348	-0.036			316	1.4717	0.71869	0.259936	0.017369				316	1.56354	0.733311	0.24721	-0.00118
								316.2	1.16475	0.505232	0.114341	-0.03562			316.2	1.47206	0.719343	0.260016	0.017133				316.2	1.56365	0.733884	0.246962	-0.00062
								316.4	1.16556	0.505964	0.114389	-0.03512			316.4	1.47315	0.719275	0.260072	0.017155				316.4	1.56308	0.734403	0.246504	-0.00031
								316.6	1.16614	0.50594	0.11452	-0.035			316.6	1.47365	0.719768	0.260231	0.017663				316.6	1.56335	0.734639	0.246094	-0.0007
								316.8	1.16628	0.506075	0.114671	-0.03506			316.8	1.47419	0.720101	0.260602	0.01731				316.8	1.56307	0.734535	0.246151	-0.00083
								317	1.16643	0.506173	0.114814	-0.0345			317	1.47458	0.720582	0.260658	0.017523				317	1.56298	0.734715	0.246603	-0.00057
								317.2	1.16691	0.506081	0.114996	-0.03443			317.2	1.47475	0.721106	0.261062	0.017718				317.2	1.56324	0.735194	0.247097	-2e-05
								317.4	1.16781	0.506578	0.115198	-0.03468			317.4	1.4754	0.721439	0.261083	0.017768				317.4	1.56362	0.735587	0.24733	-6.3e-05
								317.6	1.16807	0.506309	0.115291	-0.03458			317.6	1.47506	0.721521	0.261283	0.018067				317.6	1.56358	0.735574	0.24769	-0.00032
								317.8	1.16854	0.506745	0.115334	-0.03466			317.8	1.47484	0.722259	0.261679	0.018655				317.8	1.56386	0.735197	0.248164	-0.00022
								318	1.16911	0.507098	0.115334	-0.03495			318	1.47468	0.722402	0.261811	0.018964				318	1.56455	0.735248	0.248492	-0.0002
								318.2	1.16933	0.507447	0.115404	-0.03451			318.2	1.47513	0.722798	0.262556	0.019346				318.2	1.56542	0.735422	0.249112	7.03e-05
								318.4	1.16964	0.507513	0.115923	-0.03454			318.4	1.47534	0.723035	0.262814	0.019926				318.4	1.56597	0.735811	0.249349	0.000401
								318.6	1.16981	0.507987	0.116797	-0.03442			318.6	1.4756	0.723652	0.263134	0.02025				318.6	1.5662	0.736218	0.249795	0.000447
								318.8	1.17025	0.508348	0.11708	-0.03446			318.8	1.47564	0.723878	0.263363	0.020501				318.8	1.56682	0.736581	0.249913	0.000391
								319	1.17117	0.508736	0.116835	-0.03476			319	1.47568	0.723967	0.263522	0.020913				319	1.56773	0.73772	0.250045	0.000342
								319.2	1.17091	0.508884	0.116729	-0.0346			319.2	1.47595	0.724287	0.264224	0.020681				319.2	1.5681	0.737703	0.250494	0.000385
								319.4	1.17139	0.509079	0.116807	-0.03486			319.4	1.47635	0.724342	0.264476	0.020662				319.4	1.56832	0.738367	0.250316	0.000508
								319.6	1.17177	0.509239	0.11646	-0.03464			319.6	1.47678	0.724452	0.264575	0.020085				319.6	1.56831	0.738794	0.250149	0.000583
								319.8	1.17188	0.509403	0.116262	-0.03463			319.8	1.47724	0.724718	0.265013	0.019811				319.8	1.56814	0.739538	0.25002	0.001213
								320	1.17252	0.510014	0.116488	-0.03458			320	1.47769	0.725071	0.265147	0.020343				320	1.56795	0.739934	0.249931	0.001149
								320.2	1.17293	0.510197	0.116351	-0.0344			320.2	1.47864	0.725611	0.265284	0.020511				320.2	1.56813	0.74044	0.249412	0.001481
								320.4	1.1738	0.510645	0.116532	-0.03429			320.4	1.47905	0.725823	0.265127	0.020483				320.4	1.56848	0.740944	0.249159	0.001127
								320.6	1.17355	0.510394	0.116292	-0.0345			320.6	1.47921	0.726039	0.265102	0.02052				320.6	1.56894	0.741174	0.249157	0.000601
								320.8	1.17331	0.510495	0.1162	-0.03456			320.8	1.47977	0.726371	0.264779	0.020237				320.8	1.56908	0.741792	0.249681	0.000792
								321	1.1739	0.510933	0.116294	-0.0345			321	1.48025	0.726186	0.264306	0.020091				321	1.56936	0.742421	0.249927	0.000851
								321.2	1.17435	0.511141	0.116513	-0.03464			321.2	1.48072	0.725947	0.264579	0.020046				321.2	1.56969	0.742768	0.249825	0.000629
								321.4	1.17456	0.51154	0.11655	-0.03506			321.4	1.48064	0.72632	0.264426	0.020135				321.4	1.56995	0.743354	0.249664	0.000398
								321.6	1.1741	0.511873	0.116549	-0.03471			321.6	1.47996	0.726809	0.264689	0.020408				321.6	1.57033	0.743289	0.249889	0.000338
								321.8	1.17418	0.512191	0.116726	-0.03493			321.8	1.48008	0.726981	0.264493	0.02031				321.8	1.57066	0.743412	0.25062	0.00015
								322	1.17397	0.512782	0.116911	-0.03535			322	1.48054	0.727226	0.264678	0.02				322	1.57141	0.74372	0.250916	0.000229
								322.2	1.17371	0.513092	0.117015	-0.03504			322.2	1.48067	0.728442	0.264784	0.019831				322.2	1.57163	0.744098	0.251178	0.000194
								322.4	1.17397	0.513701	0.117462	-0.03505			322.4	1.48103	0.729219	0.264688	0.02001				322.4	1.57191	0.744626	0.251121	0.000399
								322.6	1.17405	0.514206	0.117384	-0.03497			322.6	1.48143	0.729757	0.264994	0.019985				322.6	1.57262	0.745196	0.251475	0.000288
								322.8	1.17435	0.514296	0.116942	-0.03479			322.8	1.48132	0.730131	0.264977	0.020273				322.8	1.57314	0.745466	0.251743	-0.00021
								323	1.17498	0.514517	0.116885	-0.03483			323	1.48148	0.730597	0.265402	0.019954				323	1.57355	0.74563	0.252235	-0.00034
								323.2	1.17473	0.514851	0.116843	-0.03448			323.2	1.482	0.731006	0.265701	0.019414				323.2	1.57381	0.745497	0.252221	-0.00031
								323.4	1.17547	0.514825	0.116725	-0.03451			323.4	1.48189	0.73139	0.265764	0.019322				323.4	1.57458	0.745889	0.25247	-0.00012
								323.6	1.17554	0.515067	0.116988	-0.03437			323.6	1.48248	0.731713	0.266047	0.019322				323.6	1.57481	0.746164	0.252823	0.000133
								323.8	1.1756	0.515037	0.117242	-0.0344			323.8	1.48327	0.732152	0.266366	0.01973				323.8	1.57493	0.746496	0.252654	0.000429
								324	1.17589	0.515303	0.117767	-0.03426			324	1.4838	0.731977	0.266511	0.020043				324	1.57508	0.746543	0.253119	-4.4e-05
								324.2	1.17627	0.515015	0.117572	-0.03426			324.2	1.48468	0.732447	0.266773	0.020458				324.2	1.57588	0.747106	0.253174	0.000136
								324.4	1.17631	0.515256	0.117457	-0.03431			324.4	1.4848	0.732573	0.267167	0.02064				324.4	1.57654	0.747287	0.253523	0.000241
								324.6	1.17587	0.515334	0.117354	-0.0347			324.6	1.48541	0.732444	0.267251	0.020711				324.6	1.57678	0.747559	0.253803	0.00074
								324.8	1.17654	0.51583	0.117972	-0.03452			324.8	1.48604	0.732765	0.267426	0.021074				324.8	1.57719	0.747866	0.254007	0.000949
								325	1.17723	0.516552	0.118651	-0.03487			325	1.48601	0.732813	0.267775	0.02152				325	1.57734	0.74759	0.254201	0.000959
								325.2	1.17743	0.516548	0.118758	-0.03488			325.2	1.48594	0.732846	0.268251	0.021839				325.2	1.57747	0.747755	0.2543	0.001598
								325.4	1.17745	0.517089	0.118753	-0.03486			325.4	1.48599	0.733238	0.268472	0.022032				325.4	1.57804	0.748219	0.254649	0.001894
								325.6	1.17769	0.51721	0.118799	-0.03441			325.6	1.48619	0.733041	0.268632	0.021748				325.6	1.57842	0.748597	0.254898	0.002078
								325.8	1.17836	0.51752	0.118909	-0.03463			325.8	1.48701	0.733274	0.268726	0.021553				325.8	1.579	0.74905	0.255675	0.002065
								326	1.17852	0.518067	0.119035	-0.03477			326	1.48745	0.733835	0.26912	0.021274				326	1.57946	0.749567	0.255957	0.00252
								326.2	1.17922	0.517909	0.119051	-0.03445			326.2	1.48779	0.734759	0.269115	0.020861				326.2	1.57968	0.750173	0.256043	0.002611
								326.4	1.17995	0.518211	0.118806	-0.03448			326.4	1.48803	0.734599	0.269642	0.021257				326.4	1.58032	0.750713	0.256113	0.0029
								326.6	1.18048	0.518124	0.118949	-0.03413			326.6	1.48836	0.73524	0.269652	0.021055				326.6	1.58099	0.751674	0.256039	0.002589
								326.8	1.18093	0.518369	0.118837	-0.03388			326.8	1.48824	0.735853	0.269734	0.021263				326.8	1.58133	0.751893	0.255905	0.002335
								327	1.18182	0.518758	0.118753	-0.03404			327	1.48842	0.736082	0.270003	0.021014				327	1.58178	0.752388	0.255502	0.002281
								327.2	1.18186	0.518814	0.119069	-0.03373			327.2	1.48871	0.736597	0.270251	0.020884				327.2	1.5822	0.753059	0.255284	0.002298
								327.4	1.18192	0.51833	0.119447	-0.03354			327.4	1.48902	0.737265	0.270375	0.021096				327.4	1.58282	0.75337	0.255289	0.002697
								327.6	1.18203	0.518305	0.11965	-0.0332			327.6	1.48996	0.737347	0.271027	0.021314				327.6	1.58311	0.753995	0.2553	0.002829
								327.8	1.18214	0.518185	0.119575	-0.0333			327.8	1.49056	0.73783	0.271111	0.021294				327.8	1.58357	0.754225	0.255287	0.00262
								328	1.18218	0.518346	0.119541	-0.03321			328	1.49111	0.738376	0.271506	0.021231				328	1.58402	0.754445	0.255712	0.002459
								328.2	1.18221	0.518292	0.118918	-0.0335			328.2	1.49158	0.739348	0.271789	0.021474				328.2	1.58468	0.755055	0.255831	0.002728
								328.4	1.18234	0.518621	0.118929	-0.03352			328.4	1.49187	0.739527	0.27203	0.021453				328.4	1.58534	0.755002	0.256016	0.002755
								328.6	1.18232	0.518885	0.119224	-0.03353			328.6	1.49222	0.739729	0.27182	0.021359				328.6	1.58554	0.755152	0.256055	0.003052
								328.8	1.18279	0.519008	0.119762	-0.03374			328.8	1.49269	0.739962	0.271917	0.02179				328.8	1.58573	0.755256	0.256291	0.003028
								329	1.18275	0.519193	0.119904	-0.03384			329	1.49297	0.740068	0.271691	0.021907				329	1.58596	0.755257	0.25621	0.003267
								329.2	1.18263	0.519378	0.119653	-0.03348			329.2	1.4934	0.740159	0.271944	0.021989				329.2	1.58615	0.756128	0.25648	0.003683
								329.4	1.18289	0.520069	0.119961	-0.0332			329.4	1.49403	0.740578	0.271884	0.022164				329.4	1.58664	0.75649	0.256821	0.003381
								329.6	1.18346	0.52027	0.120025	-0.0332			329.6	1.49426	0.74056	0.27179	0.021887				329.6	1.58696	0.757051	0.257248	0.003474
								329.8	1.18413	0.520679	0.120477	-0.03333			329.8	1.49449	0.74097	0.272016	0.021994				329.8	1.58766	0.75749	0.257777	0.002969
								330	1.18481	0.521178	0.12053	-0.03362			330	1.49436	0.741253	0.272036	0.021589				330	1.58798	0.757988	0.258221	0.002965
								330.2	1.18566	0.521643	0.120683	-0.03383			330.2	1.49441	0.741444	0.272163	0.021885				330.2	1.58826	0.758817	0.258326	0.002773
								330.4	1.18629	0.522299	0.12034	-0.0341			330.4	1.49409	0.742049	0.272316	0.022337				330.4	1.58867	0.759213	0.258613	0.002552
								330.6	1.18674	0.522584	0.120521	-0.03385			330.6	1.49395	0.742999	0.271867	0.022489				330.6	1.58903	0.7598	0.258794	0.001925
								330.8	1.18727	0.523005	0.120526	-0.03394			330.8	1.49376	0.743182	0.27209	0.022941				330.8	1.58905	0.759566	0.258857	0.002349
								331	1.18771	0.523287	0.120575	-0.03369			331	1.49389	0.743344	0.272501	0.023004				331	1.58915	0.760343	0.258996	0.002204
								331.2	1.18756	0.523355	0.121308	-0.03318			331.2	1.49398	0.743945	0.273012	0.0227				331.2	1.58943	0.759943	0.25956	0.002477
								331.4	1.1877	0.52338	0.12165	-0.03294			331.4	1.4943	0.744042	0.273415	0.022993				331.4	1.58931	0.760055	0.259799	0.002488
								331.6	1.18802	0.523849	0.121448	-0.03305			331.6	1.49439	0.74366	0.273729	0.022925				331.6	1.58965	0.760399	0.26053	0.002338
								331.8	1.18827	0.524434	0.121427	-0.03338			331.8	1.49461	0.744278	0.274091	0.022307				331.8	1.58991	0.760394	0.260848	0.002135
								332	1.18843	0.524702	0.121207	-0.03347			332	1.49481	0.744569	0.274468	0.022134				332	1.59021	0.760473	0.260987	0.002347
								332.2	1.18892	0.524739	0.121214	-0.03361			332.2	1.49554	0.744344	0.275239	0.02189				332.2	1.59077	0.760641	0.261463	0.002336
								332.4	1.18922	0.524965	0.121262	-0.0334			332.4	1.49624	0.744322	0.275774	0.021666				332.4	1.59112	0.759977	0.261749	0.002495
								332.6	1.18935	0.524849	0.121668	-0.03274			332.6	1.49629	0.744237	0.276103	0.021868				332.6	1.59114	0.760158	0.261669	0.003181
								332.8	1.18972	0.525023	0.121897	-0.03269			332.8	1.49723	0.74466	0.276235	0.022375				332.8	1.59158	0.760508	0.26178	0.00329
								333	1.1897	0.525148	0.122189	-0.03246			333	1.49757	0.745109	0.27645	0.022683				333	1.59209	0.760463	0.261635	0.003595
								333.2	1.18974	0.525584	0.122229	-0.03248			333.2	1.49747	0.745031	0.276944	0.022725				333.2	1.59267	0.760818	0.261642	0.004263
								333.4	1.18984	0.526043	0.122074	-0.0325			333.4	1.49746	0.745158	0.276773	0.022886				333.4	1.59333	0.760816	0.261619	0.004262
								333.6	1.19019	0.526455	0.122153	-0.03294			333.6	1.49716	0.745428	0.276788	0.023014				333.6	1.594	0.76149	0.262007	0.004141
								333.8	1.19099	0.52685	0.122392	-0.03306			333.8	1.49743	0.745982	0.276563	0.022953				333.8	1.59432	0.762123	0.262034	0.003961
								334	1.19177	0.527522	0.122333	-0.03329			334	1.49729	0.746679	0.276235	0.023151				334	1.59473	0.762584	0.262505	0.004227
								334.2	1.19211	0.52765	0.122208	-0.03365			334.2	1.49766	0.74689	0.275944	0.024036				334.2	1.59521	0.763288	0.262622	0.003912
								334.4	1.19284	0.528256	0.121953	-0.03346			334.4	1.4979	0.747653	0.27566	0.024286				334.4	1.59578	0.76369	0.263246	0.003833
								334.6	1.19352	0.528632	0.122116	-0.03306			334.6	1.49827	0.74796	0.275588	0.024803				334.6	1.59645	0.763997	0.263559	0.003854
								334.8	1.19391	0.528915	0.122369	-0.03262			334.8	1.49846	0.748293	0.275596	0.02524				334.8	1.59613	0.764395	0.263134	0.0038
								335	1.19405	0.529292	0.122039	-0.03197			335	1.49873	0.748808	0.275894	0.02518				335	1.59657	0.764925	0.263133	0.00376
								335.2	1.19455	0.529402	0.122212	-0.03202			335.2	1.49905	0.749166	0.275974	0.024872				335.2	1.59693	0.764806	0.263608	0.003991
								335.4	1.19515	0.529555	0.122407	-0.03206			335.4	1.49977	0.749319	0.276059	0.024838				335.4	1.59683	0.765452	0.263475	0.00402
								335.6	1.19566	0.530251	0.122304	-0.0323			335.6	1.50071	0.749182	0.276326	0.024207				335.6	1.59711	0.76591	0.263679	0.004092
								335.8	1.19619	0.530705	0.12226	-0.03237			335.8	1.50147	0.749803	0.27693	0.023917				335.8	1.59773	0.766445	0.263716	0.003891
								336	1.19653	0.530845	0.122385	-0.03227			336	1.50234	0.750017	0.277673	0.023776				336	1.59792	0.76702	0.263876	0.004012
								336.2	1.19677	0.531192	0.12276	-0.03191			336.2	1.50331	0.750152	0.278066	0.023678				336.2	1.59833	0.767421	0.264164	0.003802
								336.4	1.19698	0.531388	0.12291	-0.03163			336.4	1.50379	0.750641	0.278021	0.023905				336.4	1.59852	0.767438	0.264152	0.0041
								336.6	1.1969	0.531815	0.123509	-0.03155			336.6	1.50435	0.750586	0.278144	0.024186				336.6	1.59903	0.76791	0.263902	0.004411
								336.8	1.19667	0.532086	0.123771	-0.03224			336.8	1.50517	0.751428	0.278464	0.024265				336.8	1.59951	0.767871	0.263762	0.004559
								337	1.19619	0.532263	0.12391	-0.03243			337	1.5053	0.751458	0.278533	0.024302				337	1.59992	0.767897	0.263608	0.004679
								337.2	1.196	0.5324	0.123546	-0.03266			337.2	1.50582	0.7511	0.278882	0.024212				337.2	1.60007	0.768528	0.26332	0.005212
								337.4	1.19613	0.532575	0.123588	-0.03276			337.4	1.50617	0.751593	0.279129	0.023914				337.4	1.60053	0.768843	0.263416	0.004971
								337.6	1.19608	0.532683	0.124197	-0.0331			337.6	1.5058	0.752072	0.279106	0.024329				337.6	1.60108	0.769671	0.263719	0.00481
								337.8	1.19639	0.532686	0.124347	-0.03299			337.8	1.50617	0.752206	0.279168	0.024301				337.8	1.60115	0.770135	0.263658	0.004676
								338	1.19651	0.532593	0.12477	-0.03315			338	1.50641	0.753066	0.279202	0.024623				338	1.60157	0.769929	0.263998	0.004512
								338.2	1.19692	0.532592	0.124677	-0.03362			338.2	1.5067	0.753343	0.279704	0.025061				338.2	1.60184	0.770304	0.264419	0.004182
								338.4	1.19788	0.532866	0.124843	-0.03358			338.4	1.50694	0.753892	0.279672	0.025514				338.4	1.60199	0.770649	0.26511	0.004273
								338.6	1.19821	0.532604	0.124593	-0.03357			338.6	1.50718	0.75445	0.279979	0.025982				338.6	1.60163	0.770768	0.265348	0.004244
								338.8	1.19854	0.532375	0.124368	-0.03349			338.8	1.50699	0.755337	0.279869	0.025774				338.8	1.60146	0.771038	0.265381	0.003694
								339	1.19884	0.532719	0.123836	-0.03328			339	1.5073	0.755947	0.280084	0.02542				339	1.60228	0.770989	0.265775	0.004021
								339.2	1.19939	0.532766	0.123888	-0.0332			339.2	1.50714	0.756274	0.280126	0.02498				339.2	1.60253	0.771373	0.266334	0.004332
								339.4	1.19964	0.532641	0.124023	-0.03331			339.4	1.50707	0.756423	0.279976	0.02483				339.4	1.60238	0.771757	0.26629	0.004274
								339.6	1.20006	0.533091	0.123769	-0.03346			339.6	1.50738	0.756506	0.280419	0.025167				339.6	1.60241	0.77252	0.266986	0.00427
								339.8	1.20013	0.533286	0.12399	-0.03341			339.8	1.50732	0.756582	0.280307	0.025265				339.8	1.60306	0.773226	0.267293	0.004218
								340	1.20021	0.533873	0.124372	-0.03324			340	1.50748	0.756716	0.280903	0.024945				340	1.60323	0.773657	0.267713	0.004323
								340.2	1.20017	0.534495	0.124596	-0.03324			340.2	1.50749	0.756924	0.280449	0.025067				340.2	1.60394	0.774264	0.268224	0.004296
								340.4	1.20047	0.535142	0.124596	-0.03341			340.4	1.50779	0.757526	0.280213	0.025144				340.4	1.60485	0.774706	0.268406	0.004522
								340.6	1.20021	0.535725	0.125028	-0.03368			340.6	1.50819	0.757888	0.280359	0.024695				340.6	1.60563	0.775223	0.268541	0.00467
								340.8	1.20026	0.535934	0.124859	-0.03334			340.8	1.50831	0.758263	0.280908	0.02462				340.8	1.606	0.77551	0.268662	0.004763
								341	1.19978	0.536437	0.124972	-0.03272			341	1.50885	0.758015	0.281369	0.024696				341	1.60699	0.776147	0.268993	0.004777
								341.2	1.19992	0.536351	0.125004	-0.03243			341.2	1.50907	0.758046	0.281653	0.024524				341.2	1.60772	0.776964	0.269008	0.005215
								341.4	1.19964	0.536643	0.125209	-0.03236			341.4	1.50923	0.757752	0.281483	0.024047				341.4	1.60841	0.777329	0.269012	0.005334
								341.6	1.19947	0.536913	0.12572	-0.03238			341.6	1.50907	0.757761	0.28155	0.02469				341.6	1.60888	0.777935	0.268998	0.00519
								341.8	1.19965	0.537378	0.126177	-0.0318			341.8	1.51011	0.757876	0.282055	0.024885				341.8	1.60906	0.777906	0.268974	0.005302
								342	1.19997	0.53738	0.126661	-0.03181			342	1.51071	0.7586	0.282254	0.025033				342	1.60938	0.777546	0.268993	0.005598
								342.2	1.20062	0.537732	0.126652	-0.03219			342.2	1.5109	0.758598	0.282611	0.025482				342.2	1.60943	0.778314	0.269162	0.005401
								342.4	1.20074	0.537608	0.126936	-0.03218			342.4	1.51184	0.759087	0.282236	0.025986				342.4	1.6099	0.778933	0.268947	0.00586
								342.6	1.20126	0.537658	0.127062	-0.03201			342.6	1.51222	0.759522	0.282468	0.026025				342.6	1.6101	0.778997	0.268679	0.005529
								342.8	1.20154	0.537971	0.127047	-0.03209			342.8	1.51255	0.759662	0.282368	0.026032				342.8	1.61095	0.778917	0.268411	0.005369
								343	1.20136	0.538119	0.127379	-0.03202			343	1.51336	0.759908	0.282387	0.026259				343	1.61142	0.779281	0.268378	0.005667
								343.2	1.20173	0.538053	0.127604	-0.03244			343.2	1.51342	0.760134	0.282296	0.026362				343.2	1.61121	0.779821	0.268258	0.005505
								343.4	1.20194	0.537908	0.12762	-0.03293			343.4	1.51365	0.760681	0.282859	0.026659				343.4	1.61119	0.780004	0.268343	0.005054
								343.6	1.20243	0.538291	0.127765	-0.0329			343.6	1.51432	0.760971	0.283622	0.026503				343.6	1.61119	0.780384	0.268788	0.005169
								343.8	1.20294	0.538505	0.128013	-0.03279			343.8	1.51453	0.760976	0.283932	0.026451				343.8	1.61117	0.780347	0.26856	0.005048
								344	1.20356	0.538694	0.128272	-0.03289			344	1.51484	0.761971	0.284996	0.02637				344	1.6112	0.781067	0.269273	0.004747
								344.2	1.20379	0.539296	0.128082	-0.03298			344.2	1.51519	0.762541	0.285252	0.026679				344.2	1.61163	0.781447	0.269616	0.004611
								344.4	1.20397	0.539384	0.12746	-0.03332			344.4	1.51565	0.763448	0.285478	0.026523				344.4	1.6119	0.781857	0.269607	0.004632
								344.6	1.20445	0.539351	0.127429	-0.03368			344.6	1.51622	0.764191	0.286043	0.026699				344.6	1.61216	0.782067	0.269829	0.004642
								344.8	1.20497	0.539787	0.127055	-0.03353			344.8	1.51612	0.764526	0.28644	0.027193				344.8	1.61285	0.782406	0.270409	0.004864
								345	1.20511	0.539828	0.127289	-0.0339			345	1.5167	0.764459	0.287006	0.027463				345	1.61335	0.782935	0.270723	0.00493
								345.2	1.20524	0.540128	0.127393	-0.03426			345.2	1.51653	0.764558	0.286478	0.027964				345.2	1.61357	0.783199	0.270673	0.005026
								345.4	1.20552	0.540421	0.12772	-0.03435			345.4	1.5172	0.764592	0.286731	0.028155				345.4	1.61366	0.783446	0.270761	0.005221
								345.6	1.20597	0.540473	0.128341	-0.03433			345.6	1.51724	0.765088	0.287211	0.028458				345.6	1.61367	0.783448	0.27061	0.005479
								345.8	1.20618	0.540816	0.128685	-0.03389			345.8	1.51785	0.765429	0.287425	0.028649				345.8	1.6139	0.783535	0.270943	0.005823
								346	1.20662	0.541111	0.128725	-0.03388			346	1.51782	0.765556	0.287114	0.028466				346	1.61395	0.783705	0.270755	0.005911
								346.2	1.20712	0.541302	0.128796	-0.03388			346.2	1.51778	0.765533	0.287172	0.028774				346.2	1.61424	0.78384	0.270856	0.005926
								346.4	1.20729	0.541526	0.129126	-0.03375			346.4	1.51778	0.765618	0.286633	0.028614				346.4	1.61496	0.7843	0.270851	0.005945
								346.6	1.2079	0.542047	0.129422	-0.03376			346.6	1.518	0.76535	0.286013	0.028418				346.6	1.61541	0.784605	0.27118	0.005661
								346.8	1.20775	0.542539	0.129514	-0.03377			346.8	1.51821	0.765755	0.285821	0.028186				346.8	1.61597	0.784851	0.271231	0.00568
								347	1.20783	0.542689	0.12982	-0.03362			347	1.51853	0.766216	0.285719	0.027748				347	1.6162	0.784887	0.271482	0.005389
								347.2	1.20833	0.543039	0.129917	-0.03385			347.2	1.51848	0.766882	0.2857	0.027403				347.2	1.6161	0.785522	0.27175	0.005042
								347.4	1.20861	0.543537	0.130231	-0.03339			347.4	1.51893	0.767255	0.286429	0.02701				347.4	1.61635	0.785601	0.271996	0.005116
								347.6	1.2092	0.543782	0.130674	-0.03318			347.6	1.51921	0.767125	0.2864	0.026576				347.6	1.61628	0.786369	0.272334	0.005408
								347.8	1.20963	0.543754	0.130715	-0.03285			347.8	1.5194	0.767216	0.286428	0.026911				347.8	1.61613	0.786869	0.272405	0.005163
								348	1.20965	0.543891	0.131071	-0.03286			348	1.52007	0.768176	0.286686	0.02701				348	1.61644	0.787755	0.27345	0.004985
								348.2	1.20929	0.544141	0.130871	-0.03267			348.2	1.52047	0.768198	0.286979	0.026932				348.2	1.6168	0.788209	0.273785	0.005229
								348.4	1.20943	0.544373	0.130769	-0.03273			348.4	1.52097	0.768875	0.287109	0.027058				348.4	1.6174	0.789089	0.274137	0.005409
								348.6	1.20967	0.544732	0.130971	-0.03271			348.6	1.5211	0.769067	0.287297	0.027561				348.6	1.61787	0.789434	0.274513	0.005377
								348.8	1.20992	0.545154	0.130862	-0.03256			348.8	1.52139	0.769159	0.287406	0.027352				348.8	1.61811	0.789646	0.274823	0.005608
								349	1.20969	0.545251	0.131278	-0.03275			349	1.52229	0.76886	0.287933	0.02739				349	1.61803	0.789788	0.2749	0.005677
								349.2	1.20942	0.545007	0.131217	-0.03238			349.2	1.52228	0.769577	0.28822	0.028074				349.2	1.61852	0.789542	0.274873	0.005712
								349.4	1.20961	0.544715	0.131273	-0.03221			349.4	1.52273	0.770546	0.289112	0.027949				349.4	1.61844	0.789443	0.274656	0.00614
								349.6	1.20987	0.54467	0.131199	-0.03189			349.6	1.52266	0.770827	0.289711	0.027823				349.6	1.61844	0.789054	0.274366	0.006294
								349.8	1.21033	0.544887	0.130824	-0.03119			349.8	1.52315	0.771193	0.290275	0.027504				349.8	1.61879	0.789068	0.274366	0.006131
								350	1.21107	0.545361	0.130953	-0.0308			350	1.52317	0.771469	0.290436	0.02742				350	1.61892	0.788812	0.274162	0.006203
								350.2	1.21173	0.545491	0.13052	-0.03075			350.2	1.52348	0.771831	0.290688	0.027611				350.2	1.6199	0.788823	0.27428	0.006363
								350.4	1.21216	0.54592	0.13061	-0.03073			350.4	1.5235	0.772188	0.290435	0.027028				350.4	1.62044	0.789501	0.27412	0.006094
								350.6	1.21258	0.546203	0.130426	-0.03068			350.6	1.52394	0.772784	0.290313	0.027004				350.6	1.62062	0.789371	0.273915	0.006589
								350.8	1.2132	0.54678	0.130051	-0.03076			350.8	1.52387	0.773541	0.29068	0.026874				350.8	1.62116	0.789556	0.273748	0.006433
								351	1.21399	0.547	0.129657	-0.0309			351	1.52446	0.773897	0.290453	0.027064				351	1.62164	0.789898	0.27384	0.006494
								351.2	1.21418	0.547677	0.129876	-0.03114			351.2	1.52475	0.774524	0.29012	0.027185				351.2	1.62179	0.790916	0.27407	0.006394
								351.4	1.21472	0.548033	0.129925	-0.031			351.4	1.52516	0.774946	0.290451	0.027186				351.4	1.62204	0.791169	0.274332	0.006896
								351.6	1.21543	0.548274	0.129835	-0.03151			351.6	1.52532	0.775326	0.290182	0.027131				351.6	1.62229	0.791954	0.274397	0.007114
								351.8	1.21589	0.548441	0.129875	-0.0314			351.8	1.52518	0.775795	0.290261	0.026971				351.8	1.62224	0.792337	0.274888	0.00712
								352	1.21602	0.548967	0.130136	-0.03168			352	1.52517	0.776246	0.290713	0.027018				352	1.62282	0.793115	0.275748	0.007522
								352.2	1.21612	0.549109	0.13051	-0.03108			352.2	1.52536	0.776259	0.290886	0.026811				352.2	1.62298	0.79357	0.27602	0.007624
								352.4	1.21646	0.549684	0.130383	-0.03117			352.4	1.52576	0.77651	0.291245	0.026982				352.4	1.62391	0.794296	0.275973	0.0078
								352.6	1.21627	0.54961	0.13047	-0.03166			352.6	1.52591	0.776366	0.291164	0.026894				352.6	1.62411	0.794434	0.276143	0.00778
								352.8	1.21625	0.549597	0.130859	-0.03167			352.8	1.52585	0.776729	0.291168	0.026651				352.8	1.62451	0.794374	0.276212	0.007777
								353	1.21624	0.549661	0.131188	-0.03205			353	1.52602	0.776773	0.291437	0.027374				353	1.62524	0.79459	0.27652	0.007743
								353.2	1.21616	0.549409	0.13095	-0.03218			353.2	1.52585	0.777177	0.291891	0.027979				353.2	1.62578	0.794301	0.276384	0.007429
								353.4	1.21676	0.550113	0.131171	-0.03238			353.4	1.52627	0.777376	0.292377	0.027761				353.4	1.6262	0.794672	0.276128	0.007517
								353.6	1.21745	0.550423	0.131181	-0.03225			353.6	1.52655	0.777323	0.292457	0.027467				353.6	1.6265	0.794516	0.276336	0.007164
								353.8	1.21752	0.550897	0.131338	-0.03237			353.8	1.5266	0.777675	0.292496	0.02712				353.8	1.6266	0.795032	0.276521	0.007003
								354	1.21743	0.551444	0.131558	-0.03271			354	1.52679	0.778305	0.292193	0.027348				354	1.62717	0.79538	0.27689	0.007426
								354.2	1.21774	0.551616	0.131379	-0.03287			354.2	1.52699	0.778526	0.29231	0.027459				354.2	1.62811	0.796038	0.27657	0.007358
								354.4	1.21806	0.552051	0.13168	-0.03304			354.4	1.52704	0.778733	0.29262	0.027276				354.4	1.62817	0.796401	0.276138	0.00703
								354.6	1.21846	0.552363	0.131467	-0.03291			354.6	1.52758	0.779076	0.292217	0.027763				354.6	1.62817	0.796275	0.276239	0.007329
								354.8	1.21854	0.552817	0.13187	-0.03304			354.8	1.52793	0.779497	0.292343	0.027529				354.8	1.62882	0.797005	0.276275	0.00695
								355	1.21848	0.552757	0.131482	-0.03311			355	1.52833	0.78013	0.291747	0.027498				355	1.62891	0.796861	0.276603	0.007013
								355.2	1.2182	0.553387	0.131863	-0.03295			355.2	1.52856	0.780891	0.291743	0.027004				355.2	1.62892	0.796983	0.277102	0.006994
								355.4	1.21858	0.553593	0.131575	-0.03271			355.4	1.52909	0.781371	0.292279	0.026975				355.4	1.62962	0.797253	0.277521	0.007057
								355.6	1.21901	0.554066	0.131772	-0.03262			355.6	1.52887	0.781287	0.292214	0.026751				355.6	1.63009	0.797776	0.277691	0.007071
								355.8	1.21912	0.554037	0.132379	-0.0322			355.8	1.52872	0.781401	0.292651	0.026355				355.8	1.63048	0.797936	0.278364	0.007364
								356	1.21928	0.554082	0.132648	-0.03213			356	1.52892	0.781403	0.292901	0.026735				356	1.63121	0.798265	0.278853	0.007447
								356.2	1.21955	0.553572	0.132982	-0.03142			356.2	1.52933	0.781752	0.292931	0.026754				356.2	1.63159	0.798553	0.279333	0.007388
								356.4	1.21969	0.553746	0.132901	-0.03163			356.4	1.52957	0.781449	0.293493	0.027036				356.4	1.63209	0.799403	0.279676	0.007481
								356.6	1.22015	0.553645	0.133162	-0.03142			356.6	1.52959	0.78133	0.293587	0.027235				356.6	1.63164	0.799863	0.28023	0.007354
								356.8	1.22063	0.553724	0.132994	-0.03107			356.8	1.52934	0.781663	0.293929	0.027707				356.8	1.63197	0.800243	0.280594	0.007085
								357	1.22112	0.554035	0.132758	-0.03144			357	1.52971	0.781318	0.294434	0.028807				357	1.63219	0.800615	0.280498	0.007008
								357.2	1.22142	0.554271	0.132391	-0.03105			357.2	1.52994	0.78119	0.294951	0.028943				357.2	1.63241	0.801453	0.280765	0.006678
								357.4	1.22183	0.554623	0.132241	-0.03118			357.4	1.53029	0.781581	0.295198	0.029122				357.4	1.63258	0.802634	0.280934	0.006671
								357.6	1.22209	0.554501	0.132125	-0.03134			357.6	1.53027	0.782076	0.295121	0.029612				357.6	1.63243	0.80286	0.280936	0.006451
								357.8	1.22233	0.554716	0.132407	-0.03109			357.8	1.53032	0.782399	0.295477	0.030021				357.8	1.63299	0.803697	0.280947	0.006544
								358	1.22287	0.554871	0.132145	-0.03133			358	1.53096	0.782883	0.295767	0.030153				358	1.63349	0.803936	0.280828	0.006652
								358.2	1.22351	0.554992	0.132589	-0.03123			358.2	1.5311	0.783147	0.296675	0.03008				358.2	1.63366	0.804742	0.280407	0.006575
								358.4	1.22366	0.55489	0.133091	-0.03113			358.4	1.53161	0.783498	0.297014	0.030208				358.4	1.63369	0.804654	0.280236	0.00643
								358.6	1.22395	0.55493	0.133967	-0.03127			358.6	1.53218	0.783924	0.296722	0.030251				358.6	1.6336	0.804921	0.280164	0.006652
								358.8	1.22388	0.555038	0.13451	-0.0313			358.8	1.53234	0.784388	0.296988	0.029918				358.8	1.634	0.805532	0.279668	0.006571
								359	1.22386	0.555337	0.134222	-0.0315			359	1.53306	0.784401	0.296779	0.030003				359	1.63423	0.805326	0.279751	0.006745
								359.2	1.22382	0.555959	0.135177	-0.03154			359.2	1.53341	0.784548	0.296956	0.029612				359.2	1.63472	0.805062	0.279899	0.007009
								359.4	1.22382	0.556437	0.135441	-0.0318			359.4	1.53376	0.784197	0.296944	0.029815				359.4	1.63529	0.805589	0.279964	0.006952
								359.6	1.22416	0.5571	0.136136	-0.03231			359.6	1.53398	0.784053	0.29715	0.029427				359.6	1.63545	0.805756	0.280097	0.00755
								359.8	1.22425	0.557311	0.136673	-0.03279			359.8	1.53435	0.784028	0.297206	0.028948				359.8	1.63592	0.805607	0.280481	0.007862
								360	1.22472	0.557502	0.136866	-0.03295			360	1.5344	0.783971	0.297294	0.029045				360	1.6363	0.805686	0.280923	0.007994
								360.2	1.22479	0.557477	0.137205	-0.03282			360.2	1.53473	0.784229	0.297492	0.02874				360.2	1.63625	0.806281	0.281326	0.00844
								360.4	1.22479	0.557668	0.137066	-0.0325			360.4	1.53464	0.784271	0.297776	0.028391				360.4	1.63638	0.806922	0.281656	0.008433
								360.6	1.22548	0.557755	0.137211	-0.03235			360.6	1.53472	0.784455	0.298027	0.028334				360.6	1.63713	0.807657	0.281846	0.008701
								360.8	1.22538	0.557987	0.136873	-0.03246			360.8	1.53481	0.784654	0.298185	0.028878				360.8	1.63792	0.807837	0.282128	0.008728
								361	1.22554	0.558044	0.137328	-0.0325			361	1.535	0.784956	0.298106	0.029143				361	1.6383	0.808409	0.282169	0.008759
								361.2	1.22569	0.558358	0.137383	-0.03222			361.2	1.53486	0.785699	0.298052	0.028962				361.2	1.639	0.809098	0.282604	0.008638
								361.4	1.22595	0.558521	0.137487	-0.03192			361.4	1.53492	0.78654	0.298241	0.029124				361.4	1.63944	0.809354	0.282503	0.009132
								361.6	1.22648	0.558601	0.137378	-0.03134			361.6	1.53521	0.786768	0.298619	0.02923				361.6	1.63986	0.80927	0.282546	0.009207
								361.8	1.22685	0.558957	0.137679	-0.03049			361.8	1.5353	0.787187	0.299059	0.029278				361.8	1.64041	0.809405	0.283167	0.009474
								362	1.2274	0.559569	0.137852	-0.02993			362	1.53568	0.787743	0.299344	0.029138				362	1.6406	0.809414	0.283427	0.009473
								362.2	1.22752	0.559793	0.137932	-0.02938			362.2	1.53587	0.788763	0.299384	0.029501				362.2	1.64048	0.810134	0.283386	0.009482
								362.4	1.22759	0.55979	0.137822	-0.02883			362.4	1.5363	0.78919	0.2992	0.030037				362.4	1.64095	0.810205	0.283619	0.009259
								362.6	1.22782	0.559896	0.137742	-0.02896			362.6	1.53686	0.78978	0.299173	0.029978				362.6	1.64091	0.810422	0.283518	0.009049
								362.8	1.2282	0.560122	0.136904	-0.02883			362.8	1.53725	0.790098	0.299514	0.030243				362.8	1.64134	0.810605	0.283604	0.008983
								363	1.22833	0.560299	0.136884	-0.02859			363	1.53829	0.789915	0.299521	0.030355				363	1.64163	0.81061	0.284199	0.008937
								363.2	1.22902	0.56054	0.137302	-0.02894			363.2	1.53841	0.790167	0.299522	0.030385				363.2	1.64181	0.811124	0.284785	0.009037
								363.4	1.22951	0.560675	0.13671	-0.02924			363.4	1.5394	0.790299	0.299855	0.030955				363.4	1.64228	0.811892	0.285008	0.008762
								363.6	1.22978	0.561061	0.136161	-0.03026			363.6	1.53994	0.790524	0.300234	0.031181				363.6	1.64232	0.812092	0.285136	0.008879
								363.8	1.23028	0.56147	0.135664	-0.03045			363.8	1.54031	0.790277	0.300311	0.030933				363.8	1.64256	0.811969	0.285238	0.00869
								364	1.2305	0.561597	0.135602	-0.03057			364	1.54103	0.790488	0.30053	0.030334				364	1.64274	0.812122	0.285082	0.008916
								364.2	1.23022	0.561612	0.135559	-0.03078			364.2	1.54164	0.790862	0.300637	0.030139				364.2	1.64335	0.812699	0.284961	0.009096
								364.4	1.23038	0.561789	0.135254	-0.03089			364.4	1.54158	0.790702	0.301335	0.02958				364.4	1.64403	0.813195	0.285356	0.009079
								364.6	1.23097	0.56236	0.135176	-0.03163			364.6	1.54185	0.790792	0.301858	0.029887				364.6	1.64451	0.813455	0.285512	0.009004
								364.8	1.23094	0.562571	0.135173	-0.03216			364.8	1.54242	0.791053	0.30229	0.029774				364.8	1.64481	0.813413	0.285705	0.009115
								365	1.23144	0.562411	0.136074	-0.03211			365	1.54256	0.792006	0.302647	0.029475				365	1.64503	0.814024	0.286148	0.009249
								365.2	1.23141	0.563094	0.136466	-0.03232			365.2	1.54252	0.792181	0.303402	0.029461				365.2	1.64576	0.814344	0.286025	0.009805
								365.4	1.23137	0.563528	0.136717	-0.03175			365.4	1.54285	0.792645	0.303535	0.029198				365.4	1.64593	0.814548	0.28564	0.010398
								365.6	1.23156	0.563789	0.137062	-0.03174			365.6	1.54306	0.793014	0.303848	0.029546				365.6	1.64574	0.814942	0.285691	0.010254
								365.8	1.23168	0.564463	0.137802	-0.03128			365.8	1.54319	0.793671	0.30411	0.02997				365.8	1.64596	0.815268	0.285844	0.010183
								366	1.23218	0.565026	0.137468	-0.03079			366	1.54359	0.79449	0.304136	0.029926				366	1.64658	0.815575	0.285886	0.010123
								366.2	1.23208	0.565281	0.137129	-0.031			366.2	1.54354	0.795327	0.304123	0.030327				366.2	1.64637	0.816249	0.285978	0.010032
								366.4	1.23215	0.565468	0.137476	-0.03063			366.4	1.54405	0.79583	0.304374	0.030669				366.4	1.64669	0.816364	0.286361	0.009796
								366.6	1.23249	0.564985	0.137694	-0.03047			366.6	1.54455	0.79647	0.30414	0.030856				366.6	1.64689	0.816598	0.286489	0.009911
								366.8	1.23314	0.565174	0.137954	-0.03005			366.8	1.54484	0.79672	0.30387	0.031136				366.8	1.64723	0.817526	0.286675	0.010027
								367	1.23348	0.565332	0.138636	-0.0293			367	1.54546	0.796827	0.303436	0.031441				367	1.64753	0.817931	0.287083	0.009865
								367.2	1.23411	0.565698	0.138651	-0.02934			367.2	1.54544	0.797259	0.30344	0.031644				367.2	1.6475	0.818385	0.286991	0.009669
								367.4	1.23417	0.565589	0.138143	-0.02962			367.4	1.54591	0.797616	0.3034	0.032394				367.4	1.64773	0.818341	0.286908	0.009313
								367.6	1.23432	0.56585	0.138354	-0.02988			367.6	1.54585	0.797652	0.303491	0.032361				367.6	1.64776	0.818628	0.287012	0.009132
								367.8	1.23479	0.566199	0.13854	-0.02933			367.8	1.54619	0.797206	0.303296	0.032089				367.8	1.64822	0.818247	0.286858	0.008469
								368	1.23514	0.566211	0.13883	-0.02945			368	1.54618	0.797134	0.303375	0.031331				368	1.64887	0.818766	0.286964	0.008652
								368.2	1.23527	0.566572	0.13872	-0.02944			368.2	1.54569	0.796985	0.304065	0.031312				368.2	1.6501	0.819169	0.287576	0.008509
								368.4	1.236	0.566886	0.138474	-0.02951			368.4	1.54552	0.79701	0.304723	0.030804				368.4	1.65034	0.819793	0.288045	0.007948
								368.6	1.23603	0.56714	0.138492	-0.0293			368.6	1.54586	0.797373	0.304997	0.030903				368.6	1.65072	0.819588	0.28785	0.008123
								368.8	1.23623	0.567477	0.138875	-0.02926			368.8	1.54645	0.797483	0.304622	0.030802				368.8	1.6514	0.819637	0.287989	0.008354
								369	1.23657	0.567807	0.139141	-0.0288			369	1.54627	0.798052	0.304748	0.031104				369	1.6517	0.820218	0.28799	0.008664
								369.2	1.23618	0.569019	0.139396	-0.02876			369.2	1.54608	0.798119	0.304649	0.031018				369.2	1.65289	0.820368	0.287823	0.009219
								369.4	1.23626	0.569223	0.139537	-0.02849			369.4	1.54609	0.798732	0.30459	0.030829				369.4	1.6533	0.820877	0.287355	0.009112
								369.6	1.23647	0.569517	0.139163	-0.02859			369.6	1.54627	0.798608	0.305087	0.031311				369.6	1.65387	0.821193	0.287969	0.009191
								369.8	1.23668	0.570199	0.13901	-0.02835			369.8	1.54676	0.798696	0.30575	0.031601				369.8	1.65429	0.821443	0.288131	0.009659
								370	1.23683	0.570551	0.138927	-0.02883			370	1.54694	0.799126	0.305757	0.031439				370	1.65445	0.821674	0.288508	0.009848
								370.2	1.23668	0.571042	0.139753	-0.02931			370.2	1.54721	0.799195	0.305665	0.031842				370.2	1.65386	0.821872	0.288596	0.010322
								370.4	1.23683	0.570975	0.139777	-0.02901			370.4	1.54794	0.799158	0.305849	0.032311				370.4	1.65392	0.821865	0.288594	0.010716
								370.6	1.2369	0.570586	0.140297	-0.02892			370.6	1.54867	0.799371	0.305319	0.031992				370.6	1.65415	0.821934	0.288788	0.011198
								370.8	1.23731	0.570938	0.140393	-0.02881			370.8	1.54926	0.799508	0.30591	0.031909				370.8	1.65401	0.822376	0.288864	0.011145
								371	1.23744	0.571034	0.140641	-0.02887			371	1.54977	0.799757	0.306401	0.032247				371	1.65391	0.822435	0.289135	0.01091
								371.2	1.23789	0.570794	0.140774	-0.0292			371.2	1.54989	0.800171	0.306876	0.031968				371.2	1.65376	0.82303	0.289207	0.011093
								371.4	1.23846	0.570406	0.14088	-0.02982			371.4	1.55028	0.800647	0.307125	0.032222				371.4	1.65374	0.823285	0.289645	0.010982
								371.6	1.23877	0.570287	0.141118	-0.02973			371.6	1.55066	0.800762	0.307528	0.032318				371.6	1.65429	0.823566	0.290198	0.010868
								371.8	1.23918	0.570483	0.141102	-0.02982			371.8	1.55084	0.80083	0.307498	0.03223				371.8	1.6547	0.824111	0.290394	0.010612
								372	1.23945	0.570463	0.14075	-0.03008			372	1.55116	0.801558	0.308338	0.031981				372	1.65501	0.824883	0.290923	0.010917
								372.2	1.23977	0.570442	0.140664	-0.02988			372.2	1.55109	0.802251	0.30861	0.032263				372.2	1.65553	0.825556	0.29119	0.010579
								372.4	1.23998	0.570509	0.140905	-0.02981			372.4	1.55144	0.802822	0.308334	0.032141				372.4	1.65545	0.825967	0.290934	0.010551
								372.6	1.23991	0.571065	0.140974	-0.02995			372.6	1.55164	0.803143	0.307844	0.03234				372.6	1.65595	0.825648	0.29092	0.010859
								372.8	1.24025	0.572039	0.140985	-0.03012			372.8	1.55161	0.803662	0.307199	0.032688				372.8	1.65678	0.826146	0.291198	0.010617
								373	1.24035	0.572436	0.140843	-0.02991			373	1.55149	0.804216	0.307502	0.032824				373	1.65764	0.826883	0.291326	0.011102
								373.2	1.24032	0.573013	0.140938	-0.03003			373.2	1.55167	0.804699	0.307752	0.033097				373.2	1.65888	0.827545	0.291327	0.010547
								373.4	1.24111	0.573308	0.140637	-0.03004			373.4	1.55215	0.805112	0.308053	0.032995				373.4	1.65947	0.827783	0.291304	0.010343
								373.6	1.24108	0.574142	0.140653	-0.03033			373.6	1.55233	0.805028	0.308492	0.033202				373.6	1.66017	0.828065	0.291719	0.010398
								373.8	1.24117	0.574615	0.141192	-0.03057			373.8	1.55261	0.805265	0.308795	0.033368				373.8	1.65983	0.82813	0.291548	0.010575
								374	1.24079	0.575661	0.14169	-0.03111			374	1.55259	0.805093	0.308456	0.033523				374	1.66018	0.828388	0.291495	0.010143
								374.2	1.24069	0.575871	0.14173	-0.03117			374.2	1.55274	0.804596	0.308696	0.033393				374.2	1.66082	0.828653	0.291891	0.010316
								374.4	1.24064	0.575804	0.141483	-0.03115			374.4	1.55341	0.804126	0.309116	0.032887				374.4	1.66131	0.829035	0.292318	0.010241
								374.6	1.24123	0.575905	0.141682	-0.03114			374.6	1.55368	0.804348	0.309355	0.031866				374.6	1.662	0.829276	0.292574	0.010196
								374.8	1.24144	0.575801	0.141464	-0.03119			374.8	1.55387	0.804288	0.310331	0.031524				374.8	1.66242	0.829831	0.292671	0.010105
								375	1.24154	0.575392	0.141679	-0.03161			375	1.55375	0.804789	0.311002	0.031233				375	1.66265	0.82979	0.292684	0.010388
								375.2	1.24161	0.575331	0.141546	-0.0316			375.2	1.554	0.805045	0.311281	0.031011				375.2	1.66273	0.830271	0.292575	0.010728
								375.4	1.24214	0.575289	0.141342	-0.03176			375.4	1.5545	0.805357	0.311702	0.031514				375.4	1.66299	0.830425	0.292461	0.010697
								375.6	1.24191	0.574875	0.141226	-0.03179			375.6	1.55476	0.805669	0.311821	0.032132				375.6	1.66325	0.830977	0.292834	0.010843
								375.8	1.2421	0.574643	0.14104	-0.03178			375.8	1.55502	0.806346	0.312028	0.03193				375.8	1.66328	0.831831	0.29309	0.010778
								376	1.24212	0.574061	0.140507	-0.03193			376	1.55572	0.806943	0.312494	0.032117				376	1.66301	0.832261	0.29321	0.011128
								376.2	1.24273	0.573937	0.140987	-0.03158			376.2	1.55591	0.808011	0.312328	0.032154				376.2	1.66295	0.832558	0.292985	0.010659
								376.4	1.24289	0.57416	0.141277	-0.03166			376.4	1.55626	0.808593	0.312161	0.032295				376.4	1.66278	0.832684	0.292928	0.010908
								376.6	1.24296	0.574544	0.141104	-0.03175			376.6	1.55676	0.809249	0.311769	0.032512				376.6	1.66265	0.832868	0.292557	0.010858
								376.8	1.24329	0.575084	0.141144	-0.03157			376.8	1.55727	0.809677	0.312108	0.032608				376.8	1.663	0.833324	0.29255	0.010881
								377	1.24397	0.575072	0.141343	-0.03123			377	1.5576	0.810312	0.312422	0.033334				377	1.66297	0.833499	0.292264	0.010989
								377.2	1.24434	0.575369	0.141375	-0.03098			377.2	1.55793	0.81101	0.31231	0.033627				377.2	1.6631	0.83374	0.292468	0.01074
								377.4	1.24444	0.575694	0.141751	-0.03065			377.4	1.55812	0.81171	0.311786	0.033524				377.4	1.66281	0.833457	0.292661	0.010748
								377.6	1.24462	0.576383	0.142481	-0.03049			377.6	1.55802	0.812014	0.311739	0.033904				377.6	1.6625	0.833934	0.292518	0.01096
								377.8	1.24451	0.576883	0.142737	-0.03032			377.8	1.55842	0.812093	0.311218	0.034505				377.8	1.66216	0.833543	0.292958	0.011069
								378	1.24442	0.577799	0.142641	-0.03025			378	1.55847	0.81207	0.310687	0.034354				378	1.66274	0.833968	0.293721	0.011064
								378.2	1.2444	0.577536	0.142875	-0.03037			378.2	1.55852	0.812122	0.310883	0.033563				378.2	1.66305	0.833928	0.294049	0.011119
								378.4	1.24454	0.577794	0.143209	-0.02985			378.4	1.55862	0.812069	0.310664	0.033335				378.4	1.66334	0.834337	0.29452	0.01104
								378.6	1.245	0.577928	0.143575	-0.02977			378.6	1.55813	0.812115	0.310832	0.033278				378.6	1.66431	0.83463	0.294792	0.011208
								378.8	1.24534	0.578065	0.143853	-0.02979			378.8	1.55825	0.811956	0.31111	0.033561				378.8	1.66454	0.835242	0.295196	0.0111
								379	1.24571	0.578307	0.143787	-0.02957			379	1.55786	0.811944	0.311407	0.033947				379	1.66509	0.835273	0.295511	0.011417
								379.2	1.24609	0.579143	0.143696	-0.02922			379.2	1.55821	0.8117	0.311725	0.034348				379.2	1.66577	0.83567	0.295663	0.011446
								379.4	1.24687	0.579466	0.143302	-0.02933			379.4	1.55806	0.811436	0.311975	0.034716				379.4	1.66659	0.836105	0.295937	0.011383
								379.6	1.24703	0.579568	0.142737	-0.02933			379.6	1.55853	0.811561	0.311734	0.034658				379.6	1.66684	0.836963	0.296808	0.011442
								379.8	1.24717	0.579768	0.142595	-0.02945			379.8	1.559	0.811899	0.312277	0.034578				379.8	1.66785	0.837424	0.297017	0.011288
								380	1.2474	0.580085	0.142498	-0.02951			380	1.55962	0.812242	0.312336	0.034892				380	1.66823	0.838039	0.29724	0.011504
								380.2	1.24786	0.580528	0.14322	-0.02928			380.2	1.55933	0.813282	0.312813	0.03494				380.2	1.66867	0.83785	0.297423	0.010996
								380.4	1.24774	0.581286	0.14278	-0.02922			380.4	1.55952	0.813752	0.313226	0.035029				380.4	1.66878	0.838405	0.297669	0.011445
								380.6	1.24797	0.581791	0.142647	-0.02914			380.6	1.56012	0.814052	0.313441	0.034758				380.6	1.66891	0.838546	0.297397	0.011493
								380.8	1.24828	0.582392	0.142497	-0.02943			380.8	1.56046	0.814023	0.314302	0.034726				380.8	1.66911	0.838892	0.297961	0.011316
								381	1.24853	0.582524	0.142672	-0.02922			381	1.56072	0.81447	0.314375	0.035015				381	1.66895	0.838962	0.297953	0.011873
								381.2	1.24846	0.582968	0.142565	-0.02965			381.2	1.56105	0.814913	0.314007	0.03487				381.2	1.66899	0.839545	0.298034	0.012362
								381.4	1.24845	0.583311	0.142742	-0.02973			381.4	1.56133	0.815608	0.314125	0.035179				381.4	1.66841	0.839818	0.297753	0.01222
								381.6	1.24841	0.583577	0.142624	-0.02973			381.6	1.56167	0.816162	0.314377	0.035497				381.6	1.66831	0.839972	0.298295	0.012868
								381.8	1.24827	0.583589	0.142346	-0.03012			381.8	1.56213	0.816362	0.314604	0.035054				381.8	1.6684	0.839918	0.298748	0.012443
								382	1.24848	0.583505	0.142401	-0.03046			382	1.56225	0.81666	0.314714	0.034666				382	1.66837	0.839997	0.298873	0.012548
								382.2	1.24873	0.583333	0.142559	-0.03084			382.2	1.5627	0.816774	0.31537	0.034585				382.2	1.66867	0.840164	0.298207	0.012352
								382.4	1.24874	0.583411	0.142596	-0.03054			382.4	1.56293	0.816871	0.315493	0.034816				382.4	1.66907	0.840713	0.29862	0.012146
								382.6	1.24928	0.583261	0.142615	-0.0303			382.6	1.56306	0.81719	0.315906	0.034937				382.6	1.66943	0.840984	0.298859	0.012634
								382.8	1.24984	0.5834	0.142246	-0.02996			382.8	1.56367	0.81706	0.316494	0.034741				382.8	1.66946	0.84137	0.298851	0.012793
								383	1.25027	0.583439	0.142186	-0.02966			383	1.56418	0.816922	0.31657	0.034504				383	1.67036	0.841438	0.298904	0.012935
								383.2	1.25006	0.583433	0.142387	-0.02928			383.2	1.56487	0.816985	0.316779	0.034825				383.2	1.67066	0.84212	0.299229	0.013487
								383.4	1.25026	0.582696	0.141606	-0.02941			383.4	1.56499	0.817362	0.316442	0.034888				383.4	1.67096	0.842391	0.299218	0.013585
								383.6	1.25058	0.582568	0.141622	-0.02921			383.6	1.56559	0.817815	0.316511	0.034578				383.6	1.67146	0.843369	0.299208	0.013657
								383.8	1.2502	0.582558	0.142435	-0.02966			383.8	1.56579	0.818606	0.316466	0.034677				383.8	1.67196	0.843364	0.299104	0.013645
								384	1.25067	0.58283	0.142908	-0.02951			384	1.5658	0.819175	0.316378	0.034666				384	1.67197	0.843849	0.299404	0.013883
								384.2	1.25106	0.582941	0.143537	-0.0295			384.2	1.56563	0.819953	0.316707	0.034349				384.2	1.67248	0.843667	0.299617	0.013541
								384.4	1.25139	0.583594	0.143617	-0.02967			384.4	1.56604	0.82048	0.316364	0.034322				384.4	1.67276	0.844034	0.299797	0.01395
								384.6	1.25182	0.583756	0.144386	-0.02964			384.6	1.56664	0.82067	0.316389	0.034314				384.6	1.67338	0.844247	0.299826	0.013562
								384.8	1.25203	0.584223	0.144767	-0.02951			384.8	1.56672	0.8208	0.316714	0.034598				384.8	1.67355	0.844585	0.300226	0.013326
								385	1.25285	0.584288	0.145318	-0.02931			385	1.56648	0.820622	0.316205	0.034818				385	1.67424	0.845016	0.299949	0.0138
								385.2	1.2531	0.584648	0.14555	-0.02932			385.2	1.56592	0.821189	0.315837	0.035066				385.2	1.67443	0.84569	0.299832	0.013798
								385.4	1.25334	0.584459	0.14563	-0.02906			385.4	1.56607	0.821552	0.316124	0.035048				385.4	1.67429	0.846019	0.300105	0.0134
								385.6	1.25355	0.584571	0.14585	-0.02881			385.6	1.56597	0.821865	0.315958	0.034851				385.6	1.67517	0.846398	0.300766	0.013669
								385.8	1.25405	0.585144	0.1457	-0.02911			385.8	1.56636	0.821527	0.316511	0.034321				385.8	1.67586	0.84666	0.300678	0.012833
								386	1.25399	0.585622	0.146069	-0.029			386	1.56672	0.821959	0.317011	0.034599				386	1.67628	0.846955	0.300856	0.013222
								386.2	1.25379	0.586209	0.145885	-0.02835			386.2	1.56734	0.822081	0.317827	0.034572				386.2	1.67737	0.847451	0.300803	0.01304
								386.4	1.25369	0.586211	0.146227	-0.028			386.4	1.56694	0.822467	0.318121	0.034715				386.4	1.67769	0.84755	0.301113	0.013187
								386.6	1.25387	0.586295	0.1459	-0.02771			386.6	1.56744	0.822555	0.31827	0.034427				386.6	1.67835	0.847892	0.301743	0.013801
								386.8	1.25381	0.586649	0.145979	-0.0275			386.8	1.56791	0.822401	0.318577	0.034223				386.8	1.6784	0.847999	0.30184	0.0138
								387	1.254	0.58687	0.145854	-0.02703			387	1.56843	0.822646	0.318549	0.034081				387	1.67881	0.848203	0.302538	0.013756
								387.2	1.25374	0.586877	0.145702	-0.02675			387.2	1.56855	0.823185	0.319106	0.034029				387.2	1.67837	0.848563	0.303174	0.014002
								387.4	1.25435	0.587106	0.145373	-0.02711			387.4	1.56866	0.82361	0.319226	0.033946				387.4	1.67825	0.848846	0.303157	0.013787
								387.6	1.25466	0.587986	0.145739	-0.02704			387.6	1.56907	0.823624	0.319528	0.033839				387.6	1.67849	0.849401	0.303236	0.013802
								387.8	1.25512	0.588116	0.146109	-0.02719			387.8	1.56955	0.824292	0.319539	0.033751				387.8	1.67833	0.849491	0.303744	0.013672
								388	1.25572	0.588346	0.146009	-0.02755			388	1.56951	0.824522	0.319883	0.033952				388	1.67815	0.849773	0.30394	0.013525
								388.2	1.25633	0.588719	0.146408	-0.02761			388.2	1.56947	0.824834	0.320058	0.034248				388.2	1.67833	0.850073	0.304444	0.013213
								388.4	1.25723	0.589229	0.146585	-0.02785			388.4	1.5693	0.824805	0.320187	0.034963				388.4	1.67843	0.850403	0.305102	0.013423
								388.6	1.25755	0.589343	0.14689	-0.02768			388.6	1.56953	0.825117	0.320616	0.035168				388.6	1.67813	0.851033	0.305615	0.012976
								388.8	1.25805	0.589491	0.147308	-0.02753			388.8	1.56933	0.824915	0.320844	0.035704				388.8	1.67806	0.851111	0.305618	0.012564
								389	1.25885	0.589445	0.147516	-0.02775			389	1.56878	0.824876	0.320867	0.035786				389	1.67866	0.851636	0.305642	0.012654
								389.2	1.25944	0.589669	0.147662	-0.02792			389.2	1.56872	0.824939	0.321122	0.036167				389.2	1.67837	0.851942	0.305637	0.012507
								389.4	1.26005	0.589856	0.147722	-0.02803			389.4	1.56939	0.825128	0.321355	0.036472				389.4	1.67885	0.852271	0.30578	0.01284
								389.6	1.26064	0.590065	0.147921	-0.028			389.6	1.56999	0.825166	0.321596	0.036256				389.6	1.68006	0.852219	0.306001	0.013008
								389.8	1.26094	0.590647	0.148126	-0.0285			389.8	1.57075	0.825082	0.322066	0.036132				389.8	1.68019	0.852211	0.306076	0.012598
								390	1.26093	0.590529	0.148609	-0.02848			390	1.57133	0.825448	0.322036	0.036105				390	1.6808	0.852886	0.306068	0.012664
								390.2	1.26092	0.590523	0.148704	-0.02833			390.2	1.57141	0.825711	0.322071	0.036162				390.2	1.68164	0.852978	0.305808	0.012391
								390.4	1.26099	0.590502	0.148872	-0.02899			390.4	1.5713	0.826516	0.321568	0.03617				390.4	1.68195	0.85308	0.305847	0.012318
								390.6	1.26067	0.590867	0.148694	-0.02894			390.6	1.57239	0.826858	0.321377	0.036004				390.6	1.68274	0.853844	0.306186	0.012549
								390.8	1.26088	0.591504	0.148781	-0.02891			390.8	1.57262	0.82767	0.321292	0.036161				390.8	1.68288	0.853944	0.306389	0.012526
								391	1.26063	0.591903	0.148488	-0.02886			391	1.57308	0.828154	0.321246	0.03593				391	1.68313	0.854421	0.306934	0.012825
								391.2	1.26029	0.591924	0.148659	-0.02877			391.2	1.57351	0.828406	0.321181	0.035811				391.2	1.68321	0.854791	0.306861	0.012854
								391.4	1.26034	0.592077	0.149045	-0.02908			391.4	1.57374	0.828782	0.320882	0.035664				391.4	1.68406	0.855078	0.306732	0.013376
								391.6	1.26034	0.592522	0.149396	-0.02893			391.6	1.57397	0.829631	0.321061	0.035244				391.6	1.68466	0.855086	0.306658	0.013683
								391.8	1.25977	0.592424	0.149649	-0.02853			391.8	1.57404	0.830485	0.320911	0.035319				391.8	1.68476	0.855724	0.306332	0.013627
								392	1.25952	0.592791	0.149837	-0.02919			392	1.57393	0.830837	0.321083	0.035709				392	1.68427	0.855874	0.306368	0.014091
								392.2	1.25967	0.593175	0.150461	-0.0291			392.2	1.57354	0.830789	0.321522	0.035951				392.2	1.68404	0.856689	0.306369	0.014945
								392.4	1.25966	0.593185	0.150591	-0.0296			392.4	1.5736	0.830619	0.321791	0.036008				392.4	1.68436	0.857077	0.306442	0.015323
								392.6	1.25945	0.592844	0.150753	-0.02975			392.6	1.57375	0.831227	0.322027	0.035785				392.6	1.68393	0.857233	0.306246	0.015449
								392.8	1.25959	0.592974	0.150964	-0.02955			392.8	1.57343	0.831291	0.322502	0.036168				392.8	1.68428	0.857063	0.306225	0.01551
								393	1.25988	0.59266	0.150879	-0.02982			393	1.57322	0.831786	0.322482	0.036575				393	1.68425	0.857075	0.306396	0.016253
								393.2	1.26037	0.592582	0.151236	-0.0298			393.2	1.57322	0.831647	0.322854	0.03692				393.2	1.6844	0.857394	0.306287	0.016696
								393.4	1.26022	0.592714	0.15119	-0.02956			393.4	1.57326	0.831919	0.323338	0.037119				393.4	1.68506	0.857134	0.30644	0.01706
								393.6	1.2607	0.592367	0.151211	-0.02949			393.6	1.57373	0.832101	0.323711	0.036816				393.6	1.68549	0.856904	0.30643	0.016398
								393.8	1.2613	0.59261	0.151425	-0.02968			393.8	1.57362	0.832455	0.323751	0.036803				393.8	1.68542	0.857223	0.306655	0.015934
								394	1.26143	0.592344	0.151394	-0.02925			394	1.57405	0.832549	0.323778	0.037062				394	1.68608	0.85813	0.306901	0.015863
								394.2	1.26179	0.5925	0.151378	-0.02874			394.2	1.57401	0.833193	0.323647	0.037376				394.2	1.686	0.858535	0.307156	0.015613
								394.4	1.26201	0.592756	0.151392	-0.02894			394.4	1.57397	0.834019	0.323758	0.037157				394.4	1.68626	0.858453	0.307421	0.015085
								394.6	1.26246	0.593143	0.151232	-0.02892			394.6	1.57479	0.833965	0.324012	0.036932				394.6	1.68669	0.858864	0.308062	0.014826
								394.8	1.26301	0.594115	0.150996	-0.02877			394.8	1.57524	0.834318	0.323469	0.037097				394.8	1.68734	0.858847	0.308387	0.01436
								395	1.2634	0.594605	0.151081	-0.02827			395	1.5758	0.834433	0.32386	0.037011				395	1.68777	0.859041	0.308748	0.013932
								395.2	1.26368	0.594691	0.151176	-0.02787			395.2	1.57596	0.834114	0.323798	0.036632				395.2	1.68899	0.859429	0.308749	0.013309
								395.4	1.26449	0.595535	0.151538	-0.02799			395.4	1.57616	0.834298	0.324	0.036365				395.4	1.68969	0.859693	0.308452	0.013298
								395.6	1.26454	0.596457	0.15142	-0.02776			395.6	1.57639	0.83471	0.324286	0.036648				395.6	1.68976	0.860067	0.30824	0.01303
								395.8	1.2646	0.597177	0.15166	-0.0277			395.8	1.57697	0.83475	0.324266	0.037135				395.8	1.69007	0.860628	0.308222	0.012956
								396	1.26511	0.597751	0.151595	-0.02835			396	1.57757	0.834408	0.324481	0.037008				396	1.68991	0.860919	0.308676	0.013182
								396.2	1.26541	0.597947	0.151625	-0.02824			396.2	1.57805	0.834302	0.324544	0.037147				396.2	1.68999	0.861847	0.308459	0.013871
								396.4	1.26563	0.598164	0.151379	-0.02828			396.4	1.57876	0.834112	0.32422	0.03701				396.4	1.69023	0.862075	0.30855	0.013678
								396.6	1.26604	0.597951	0.150775	-0.02825			396.6	1.57901	0.834746	0.324316	0.037211				396.6	1.69012	0.862197	0.309144	0.013839
								396.8	1.26593	0.598645	0.150582	-0.02784			396.8	1.57914	0.83502	0.324789	0.037629				396.8	1.69061	0.862473	0.31	0.014054
								397	1.26606	0.598431	0.150994	-0.02815			397	1.57938	0.835492	0.325055	0.037908				397	1.69103	0.862691	0.310011	0.014377
								397.2	1.26642	0.598625	0.151178	-0.02805			397.2	1.57943	0.835257	0.326099	0.037594				397.2	1.69161	0.862949	0.310324	0.014568
								397.4	1.26598	0.598789	0.150946	-0.02778			397.4	1.57905	0.83522	0.326619	0.037775				397.4	1.69186	0.863083	0.310509	0.014517
								397.6	1.26685	0.598703	0.151522	-0.02747			397.6	1.57943	0.835767	0.326901	0.03782				397.6	1.69202	0.863162	0.310679	0.014468
								397.8	1.26732	0.59858	0.152138	-0.02785			397.8	1.57957	0.836199	0.32717	0.037991				397.8	1.69204	0.863424	0.311265	0.015327
								398	1.26723	0.598285	0.152471	-0.02763			398	1.57989	0.836893	0.327446	0.038193				398	1.69198	0.863959	0.311668	0.01548
								398.2	1.26788	0.598386	0.152757	-0.02774			398.2	1.57963	0.837541	0.327636	0.038348				398.2	1.692	0.863796	0.311973	0.015563
								398.4	1.26816	0.598205	0.152952	-0.02816			398.4	1.57932	0.838472	0.32817	0.038234				398.4	1.69241	0.86321	0.312298	0.015749
								398.6	1.26849	0.598512	0.15334	-0.02835			398.6	1.57989	0.838642	0.328182	0.038828				398.6	1.69271	0.863971	0.313144	0.015695
								398.8	1.26896	0.598707	0.153752	-0.02867			398.8	1.57994	0.839428	0.328181	0.0393				398.8	1.69319	0.864723	0.313178	0.016058
								399	1.26931	0.598743	0.153941	-0.02892			399	1.57962	0.839687	0.329074	0.039263				399	1.69301	0.864993	0.313608	0.016237
								399.2	1.26911	0.59903	0.154262	-0.02929			399.2	1.57914	0.839847	0.329284	0.039028				399.2	1.69317	0.865371	0.313386	0.016416
								399.4	1.26889	0.599616	0.154785	-0.0294			399.4	1.57931	0.840101	0.329729	0.039499				399.4	1.69312	0.865666	0.31335	0.016409
[truncated: 7,002 more rows]

## Sheet: Fig 1C- Nanobody PI3Kg specific
	p110a	p110a	p110b	p110b	p110y	p110y	p110d	p110d
Time1	a-1	a-2	b-1	b-2	y-1	y-2	d-1	d-2
0	-0.0246845	-0.0213506	-0.0282421	-0.0253059	-0.026972	-0.0295261	-0.0260566	-0.0228609
0.2	-0.0248091	-0.0212976	-0.0283973	-0.0253696	-0.0251385	-0.0278001	-0.0265555	-0.0230644
0.4	-0.0254192	-0.0209276	-0.028385	-0.0252107	-0.0226784	-0.0258754	-0.026863	-0.0231667
0.6	-0.0253407	-0.0202728	-0.0283976	-0.0254009	-0.0202758	-0.0237681	-0.027196	-0.0233517
0.8	-0.0256856	-0.0201519	-0.028385	-0.0251861	-0.0176401	-0.0208927	-0.0275214	-0.0236029
1	-0.025475	-0.0198985	-0.0284182	-0.0251707	-0.0148286	-0.0182323	-0.0278348	-0.0238391
1.2	-0.0255885	-0.0199551	-0.0283969	-0.0254842	-0.0120752	-0.0156523	-0.0279339	-0.0242047
1.4	-0.0257507	-0.019592	-0.0289302	-0.0256835	-0.00916783	-0.0127992	-0.0279756	-0.024579
1.6	-0.02547	-0.0191567	-0.0289287	-0.0259018	-0.00606318	-0.0100267	-0.0281766	-0.0247672
1.8	-0.0253603	-0.0191554	-0.0288399	-0.0260386	-0.0031567	-0.0071903	-0.0281455	-0.0252768
2	-0.0255526	-0.0197276	-0.02868	-0.0261364	-0.00049241	-0.00430803	-0.028497	-0.025764
2.2	-0.0258459	-0.0201306	-0.0288432	-0.0263362	0.00229858	-0.00150547	-0.0287649	-0.0259364
2.4	-0.0258806	-0.0207082	-0.0292213	-0.0265142	0.00526855	0.00141271	-0.0288266	-0.0258084
2.6	-0.02635	-0.0209311	-0.0296023	-0.0264346	0.00788428	0.00388264	-0.0288001	-0.0258466
2.8	-0.0268591	-0.0212739	-0.0297175	-0.0268376	0.0107408	0.00693237	-0.0288602	-0.0262464
3	-0.0271453	-0.0215747	-0.0297898	-0.0270491	0.0137985	0.00943742	-0.0288887	-0.0259859
3.2	-0.0274474	-0.0219858	-0.029518	-0.0274756	0.0166954	0.0123696	-0.0291768	-0.0263101
3.4	-0.0276749	-0.0218702	-0.0298918	-0.0278668	0.0196372	0.0146159	-0.0295034	-0.0262391
3.6	-0.0277837	-0.0219852	-0.0301884	-0.0280678	0.0230039	0.017214	-0.0294767	-0.0261196
3.8	-0.028116	-0.0222527	-0.0302356	-0.0282253	0.0263161	0.0202381	-0.0292227	-0.0261817
4	-0.0284397	-0.0231341	-0.0302345	-0.0280578	0.0296969	0.0230272	-0.0296724	-0.0262126
4.2	-0.0285927	-0.0232834	-0.0302632	-0.0277018	0.0328135	0.025675	-0.0299038	-0.0261879
4.4	-0.028607	-0.0229462	-0.0301549	-0.0273201	0.0358547	0.0285592	-0.0299933	-0.0265206
4.6	-0.0280682	-0.0227362	-0.030059	-0.0275601	0.0386822	0.0313451	-0.0301341	-0.0267061
4.8	-0.0277888	-0.0228877	-0.0301817	-0.0270957	0.0416328	0.03447	-0.0303297	-0.0267558
5	-0.027242	-0.0225368	-0.0305239	-0.0274007	0.0442577	0.0368936	-0.0303919	-0.026974
5.2	-0.0271438	-0.0224792	-0.0307449	-0.0281266	0.0469712	0.0398153	-0.0306275	-0.0269567
5.4	-0.0267502	-0.0218727	-0.0310021	-0.0283424	0.0494599	0.0428879	-0.030545	-0.0271596
5.6	-0.0263797	-0.0216829	-0.0302978	-0.0279888	0.05216	0.0461082	-0.0307047	-0.0271593
5.8	-0.0262766	-0.0218107	-0.0300343	-0.027993	0.0550566	0.0491778	-0.0306322	-0.0275239
6	-0.0267846	-0.0218728	-0.0301598	-0.0283667	0.0578817	0.0521807	-0.0311552	-0.0277288
6.2	-0.0269704	-0.0218107	-0.0307988	-0.0285722	0.060944	0.054961	-0.031232	-0.0275563
6.4	-0.0270463	-0.0218068	-0.0307906	-0.0291749	0.063562	0.0578422	-0.0311779	-0.0278688
6.6	-0.027435	-0.0213465	-0.0308681	-0.0291407	0.0662405	0.060195	-0.0313926	-0.0281346
6.8	-0.0279488	-0.0215506	-0.0312414	-0.029604	0.0685256	0.0630998	-0.0315961	-0.0284424
7	-0.0280699	-0.021221	-0.0311911	-0.030015	0.0712297	0.0652456	-0.0320964	-0.0287147
7.2	-0.0283252	-0.0212819	-0.0311436	-0.030806	0.0742523	0.0680763	-0.0323589	-0.0291208
7.4	-0.0283731	-0.0211254	-0.0315337	-0.0307141	0.0769036	0.0702812	-0.0325693	-0.028761
7.6	-0.0288372	-0.021587	-0.0317195	-0.0306733	0.0800292	0.0729231	-0.0323405	-0.0286883
7.8	-0.0293511	-0.0222473	-0.0316325	-0.0307136	0.0826586	0.0755541	-0.0321935	-0.0285755
8	-0.0296079	-0.0230703	-0.0318806	-0.0302507	0.0853479	0.0777959	-0.0322687	-0.0285156
8.2	-0.0294282	-0.0233862	-0.0317675	-0.0299707	0.0877741	0.0803565	-0.0321876	-0.0286563
8.4	-0.0290919	-0.023817	-0.0319549	-0.0297621	0.0903508	0.0828419	-0.0326915	-0.0291486
8.6	-0.0290731	-0.024438	-0.032114	-0.0295508	0.0931416	0.0851511	-0.0326994	-0.0290589
8.8	-0.0285626	-0.0249039	-0.0322148	-0.0294746	0.0962281	0.0874985	-0.0331858	-0.0291307
9	-0.0288177	-0.0252332	-0.0323902	-0.0297232	0.0988223	0.0900626	-0.0333441	-0.0291397
9.2	-0.028728	-0.0259014	-0.0324675	-0.0298684	0.101224	0.0925742	-0.0333863	-0.0291149
9.4	-0.0284312	-0.0260365	-0.0325454	-0.0297609	0.10394	0.0949131	-0.0332445	-0.029329
9.6	-0.0283238	-0.0259915	-0.0326417	-0.0295344	0.10699	0.0977819	-0.0333395	-0.0296747
9.8	-0.028429	-0.0260735	-0.0328922	-0.0298961	0.110307	0.100016	-0.0330194	-0.030373
10	-0.028962	-0.0260085	-0.0333304	-0.0298798	0.113067	0.102508	-0.0329789	-0.0308735
10.2	-0.028555	-0.0260297	-0.0332682	-0.0300268	0.116306	0.104888	-0.032644	-0.0313819
10.4	-0.0286607	-0.0258071	-0.0328058	-0.0305705	0.119208	0.107266	-0.0323833	-0.0318532
10.6	-0.0284894	-0.0255921	-0.0329468	-0.0304181	0.12244	0.109219	-0.0324485	-0.0321316
10.8	-0.0286294	-0.0256394	-0.0329362	-0.0311606	0.125263	0.11201	-0.0327785	-0.0323092
11	-0.0289244	-0.0250636	-0.0324359	-0.0318011	0.128671	0.113939	-0.0329951	-0.032611
11.2	-0.0290015	-0.0250853	-0.0328804	-0.0321789	0.13157	0.116804	-0.0328375	-0.032828
11.4	-0.0292623	-0.0250252	-0.0328917	-0.0322584	0.134119	0.118793	-0.0326854	-0.0323474
11.6	-0.0300263	-0.0252292	-0.0327985	-0.0323387	0.137299	0.121051	-0.0326562	-0.0322346
11.8	-0.0299207	-0.0252622	-0.0327682	-0.0324917	0.139789	0.123559	-0.032846	-0.031717
12	-0.0297406	-0.0251748	-0.0327914	-0.032235	0.142247	0.125882	-0.0329539	-0.0314539
12.2	-0.0295509	-0.0250093	-0.0323944	-0.0324397	0.144827	0.128648	-0.0335073	-0.0312784
12.4	-0.0291105	-0.0249232	-0.0327874	-0.0319898	0.147506	0.130647	-0.0341312	-0.0305778
12.6	-0.029325	-0.0249662	-0.0327291	-0.031723	0.150318	0.133015	-0.0343385	-0.0301264
12.8	-0.0291354	-0.0251003	-0.0328049	-0.0323404	0.153178	0.135373	-0.0350013	-0.0299509
13	-0.0292896	-0.0251995	-0.0335248	-0.0320459	0.155067	0.138204	-0.0349757	-0.0298253
13.2	-0.0290341	-0.0258342	-0.0339846	-0.032247	0.157137	0.140819	-0.0351718	-0.0294781
13.4	-0.028599	-0.0260318	-0.0342083	-0.032539	0.159802	0.143934	-0.0354066	-0.0293642
13.6	-0.0286771	-0.0262599	-0.0341096	-0.0325274	0.161892	0.146844	-0.0355292	-0.030057
13.8	-0.0289271	-0.0268808	-0.0340163	-0.03215	0.164384	0.149348	-0.0353165	-0.0306531
14	-0.0290327	-0.0269427	-0.0337849	-0.0322743	0.166788	0.151995	-0.035619	-0.0308602
14.2	-0.0290317	-0.0274274	-0.0336438	-0.0331087	0.169505	0.154339	-0.0358314	-0.0309541
14.4	-0.0294715	-0.0272757	-0.033796	-0.0332597	0.172035	0.156603	-0.0359095	-0.0307574
14.6	-0.0294403	-0.0274479	-0.0339903	-0.0330021	0.174907	0.159088	-0.0360816	-0.0309929
14.8	-0.0297353	-0.0274454	-0.0339461	-0.0334602	0.17748	0.161406	-0.0362331	-0.0313817
15	-0.0301625	-0.0272765	-0.0335357	-0.0330404	0.179965	0.163508	-0.0361063	-0.0318171
15.2	-0.030222	-0.0274411	-0.0338056	-0.0330204	0.182524	0.165705	-0.0359378	-0.0322588
15.4	-0.0302049	-0.0278069	-0.0337111	-0.0330623	0.185339	0.167792	-0.0359296	-0.0325509
15.6	-0.0299502	-0.0276713	-0.0336765	-0.0330917	0.188004	0.1705	-0.0361025	-0.032733
15.8	-0.0297313	-0.0275936	-0.0337548	-0.0330269	0.190457	0.173238	-0.0361264	-0.0325055
16	-0.0299332	-0.0275003	-0.0334128	-0.0329742	0.192992	0.175742	-0.0361156	-0.0326443
16.2	-0.0297719	-0.0274526	-0.0331922	-0.0327033	0.196291	0.178086	-0.0366461	-0.0328219
16.4	-0.0300643	-0.0273769	-0.033579	-0.0324491	0.199392	0.180238	-0.0371126	-0.0327716
16.6	-0.0306579	-0.0275733	-0.033513	-0.0331935	0.202416	0.182836	-0.0375145	-0.0331697
16.8	-0.0308781	-0.0276415	-0.0339447	-0.0337922	0.205299	0.185657	-0.037775	-0.0335161
17	-0.0311432	-0.0274693	-0.0344005	-0.0335757	0.208133	0.188331	-0.0377136	-0.0332915
17.2	-0.0311967	-0.0278105	-0.0343568	-0.0340691	0.21122	0.190382	-0.0377232	-0.0335263
17.4	-0.0312767	-0.0279967	-0.0343925	-0.034347	0.214172	0.192892	-0.0378163	-0.0340436
17.6	-0.0316896	-0.0279989	-0.0341224	-0.0342709	0.217105	0.19511	-0.0381427	-0.0344263
17.8	-0.0319455	-0.0285935	-0.034247	-0.0345058	0.219746	0.197112	-0.0380715	-0.0343768
18	-0.0322984	-0.0282864	-0.0341822	-0.0351615	0.222559	0.199029	-0.0382084	-0.0340153
18.2	-0.0327839	-0.028578	-0.0346033	-0.0356174	0.225397	0.201077	-0.0383641	-0.033728
18.4	-0.0326968	-0.0283689	-0.0348415	-0.0355579	0.228185	0.202792	-0.0379557	-0.0336857
18.6	-0.0326962	-0.0286256	-0.0349484	-0.0354338	0.23086	0.204957	-0.0380305	-0.0339958
18.8	-0.0325137	-0.0285447	-0.0350256	-0.0356317	0.233421	0.207179	-0.0378911	-0.0341072
19	-0.0325353	-0.0283618	-0.034896	-0.0354491	0.235701	0.209795	-0.0377149	-0.0344959
19.2	-0.0321755	-0.0287153	-0.035307	-0.0359499	0.238347	0.212119	-0.0376354	-0.0347345
19.4	-0.0317771	-0.0289276	-0.0353623	-0.0356928	0.241043	0.214863	-0.0375017	-0.0347497
19.6	-0.0318258	-0.0287182	-0.0351178	-0.0357247	0.243059	0.217776	-0.0374702	-0.0343186
19.8	-0.0321483	-0.028359	-0.0346752	-0.0356262	0.245064	0.220714	-0.0373549	-0.0343163
20	-0.0320155	-0.0283607	-0.0346189	-0.0357426	0.247241	0.222986	-0.0374324	-0.0344799
20.2	-0.0318239	-0.0280378	-0.0345037	-0.0355044	0.249587	0.225399	-0.0378199	-0.0348614
20.4	-0.0322046	-0.0277719	-0.0346916	-0.0356738	0.25142	0.228046	-0.0379015	-0.0345377
20.6	-0.0320816	-0.0277482	-0.0345852	-0.0366155	0.253592	0.23058	-0.0379244	-0.0342739
20.8	-0.032121	-0.0278119	-0.0352483	-0.0363637	0.25588	0.233237	-0.0378524	-0.0340623
21	-0.031651	-0.0280196	-0.0352202	-0.0362703	0.258319	0.235155	-0.0373503	-0.0338527
21.2	-0.0314187	-0.0286678	-0.0348066	-0.0366446	0.260888	0.237196	-0.0374094	-0.0342293
21.4	-0.0314294	-0.0291211	-0.0345728	-0.0363839	0.263239	0.239909	-0.0376475	-0.0334684
21.6	-0.0311332	-0.0292686	-0.0340752	-0.0361769	0.265484	0.242025	-0.037642	-0.0330667
21.8	-0.0310409	-0.0300683	-0.0340653	-0.0365517	0.26763	0.24373	-0.0376826	-0.0327219
22	-0.0312058	-0.0295977	-0.0339423	-0.036278	0.269975	0.246042	-0.037875	-0.0325327
22.2	-0.0312862	-0.0298801	-0.0340737	-0.0368814	0.272615	0.248747	-0.0381015	-0.0323943
22.4	-0.0311433	-0.0300925	-0.0341178	-0.0368114	0.274708	0.250885	-0.0380572	-0.032534
22.6	-0.0310327	-0.0302439	-0.0341763	-0.0368124	0.277207	0.253754	-0.038733	-0.0330491
22.8	-0.0310652	-0.030039	-0.0343344	-0.0368372	0.279694	0.256344	-0.0389904	-0.033549
23	-0.0313265	-0.0300108	-0.0341276	-0.036827	0.282402	0.258806	-0.0396058	-0.0340716
23.2	-0.0313941	-0.0303814	-0.0342154	-0.0369501	0.285426	0.260821	-0.0396777	-0.03456
23.4	-0.0315629	-0.0297844	-0.0340205	-0.0369662	0.288004	0.263209	-0.0397966	-0.0349816
23.6	-0.0317267	-0.0293512	-0.0337854	-0.037023	0.29026	0.265203	-0.0400861	-0.0352849
23.8	-0.0319674	-0.0289976	-0.0338785	-0.0369489	0.293007	0.26741	-0.0402004	-0.0358961
24	-0.0319595	-0.0291305	-0.0344433	-0.0363758	0.29585	0.269341	-0.0403151	-0.0359361
24.2	-0.0322066	-0.0286203	-0.0345102	-0.0362444	0.298542	0.271748	-0.0407896	-0.0362116
24.4	-0.0323725	-0.0288577	-0.0350331	-0.0364612	0.301563	0.274218	-0.0406256	-0.0362019
24.6	-0.0322361	-0.0287502	-0.035628	-0.0365067	0.3047	0.276171	-0.0407191	-0.0364241
24.8	-0.0323966	-0.0288584	-0.0362491	-0.0360553	0.307539	0.278207	-0.0408347	-0.0364831
25	-0.0321594	-0.0290543	-0.0359364	-0.0355381	0.310176	0.28085	-0.040692	-0.036438
25.2	-0.0323371	-0.0293038	-0.0358622	-0.0353016	0.312982	0.283326	-0.0411752	-0.0361319
25.4	-0.0323446	-0.0291617	-0.0362503	-0.0345752	0.31509	0.285879	-0.0411039	-0.0355943
25.6	-0.0321852	-0.0294918	-0.0365906	-0.0349045	0.317354	0.288128	-0.0413627	-0.0356954
25.8	-0.0322054	-0.029827	-0.0369119	-0.0352073	0.319721	0.290614	-0.0415162	-0.0356944
26	-0.0318533	-0.0293353	-0.0369219	-0.0349377	0.322109	0.293228	-0.0416215	-0.0355551
26.2	-0.0318698	-0.0297525	-0.0370187	-0.0355552	0.324577	0.295859	-0.0415956	-0.0355363
26.4	-0.0322178	-0.0303397	-0.037161	-0.0354932	0.326355	0.297996	-0.0421348	-0.0357755
26.6	-0.0323606	-0.0301816	-0.0371516	-0.0360172	0.328511	0.300139	-0.0425585	-0.0363718
26.8	-0.0327881	-0.0300596	-0.036989	-0.0363529	0.330708	0.302294	-0.0427044	-0.0365035
27	-0.0329364	-0.0304043	-0.036387	-0.0369766	0.333285	0.304587	-0.0425957	-0.0365729
27.2	-0.0329207	-0.0307954	-0.0361504	-0.0374764	0.33551	0.306402	-0.0423332	-0.0367706
27.4	-0.0332814	-0.0309139	-0.0357179	-0.0377234	0.337733	0.308422	-0.0423991	-0.0365336
27.6	-0.0336378	-0.0314393	-0.0353257	-0.0379203	0.340081	0.310433	-0.0422756	-0.0361338
27.8	-0.0340802	-0.0317598	-0.0354292	-0.0378727	0.342695	0.312663	-0.0421103	-0.0360097
28	-0.0340734	-0.0319694	-0.0351518	-0.0381239	0.345202	0.315065	-0.0419906	-0.0360395
28.2	-0.0342411	-0.0318445	-0.0348051	-0.0386501	0.347354	0.317325	-0.0420928	-0.0367668
28.4	-0.0344206	-0.0317597	-0.0344637	-0.0384423	0.349846	0.319849	-0.041896	-0.0370372
28.6	-0.0340078	-0.0318791	-0.0347893	-0.0380852	0.352127	0.321802	-0.0418566	-0.0369912
28.8	-0.0339481	-0.0316169	-0.0347768	-0.0380643	0.354474	0.324006	-0.041803	-0.0365961
29	-0.0334063	-0.032129	-0.0346273	-0.0375562	0.357327	0.326838	-0.0421726	-0.0362676
29.2	-0.0329269	-0.0325012	-0.0347966	-0.037553	0.360344	0.328828	-0.041988	-0.0359859
29.4	-0.0323695	-0.0322374	-0.0350499	-0.0374636	0.362952	0.331224	-0.0418401	-0.0358237
29.6	-0.0323216	-0.0327584	-0.0350693	-0.037646	0.365752	0.333475	-0.0419322	-0.0357161
29.8	-0.0320252	-0.0326972	-0.035338	-0.0373036	0.368222	0.335862	-0.0418432	-0.0355409
30	-0.031968	-0.0328576	-0.0354305	-0.0370872	0.370722	0.337954	-0.0419017	-0.0352583
30.2	-0.0323476	-0.0330816	-0.0357868	-0.0374373	0.373162	0.339845	-0.0423167	-0.0353265
30.4	-0.0326973	-0.033126	-0.0364981	-0.0375585	0.375335	0.341461	-0.0423622	-0.0354117
30.6	-0.03314	-0.0328787	-0.036504	-0.0376626	0.377375	0.343204	-0.0423065	-0.0355883
30.8	-0.033535	-0.0331191	-0.0367113	-0.0376536	0.379943	0.345628	-0.0422765	-0.0353945
31	-0.0336949	-0.033339	-0.0366761	-0.0374208	0.38225	0.347688	-0.0424414	-0.0356891
31.2	-0.033543	-0.0341154	-0.0369576	-0.0373315	0.384318	0.349656	-0.0423142	-0.0356161
31.4	-0.0341033	-0.0342108	-0.0367523	-0.0375342	0.386828	0.351674	-0.0423999	-0.0355652
31.6	-0.0339684	-0.0339646	-0.0368689	-0.0379488	0.388956	0.35391	-0.0424059	-0.0360452
31.8	-0.0342568	-0.0339116	-0.0367628	-0.0380566	0.3913	0.355973	-0.0427157	-0.0364586
32	-0.0345669	-0.0338247	-0.0362497	-0.038779	0.393283	0.358578	-0.0424176	-0.0373464
32.2	-0.03474	-0.0332174	-0.0359967	-0.0388136	0.395149	0.360716	-0.0425971	-0.0380074
32.4	-0.0349932	-0.0325375	-0.035743	-0.0388678	0.39749	0.362575	-0.0426532	-0.0383304
32.6	-0.0347136	-0.0323031	-0.0360372	-0.039186	0.399637	0.364519	-0.0424122	-0.0386336
32.8	-0.034825	-0.0316933	-0.0351709	-0.0398801	0.402136	0.366396	-0.0426063	-0.0386895
33	-0.0343504	-0.0315135	-0.0353241	-0.040435	0.405104	0.368743	-0.043118	-0.0387688
33.2	-0.0339694	-0.0308569	-0.0352639	-0.0406498	0.40753	0.370841	-0.0428883	-0.0386992
33.4	-0.033781	-0.0304906	-0.0354337	-0.0408293	0.410242	0.372998	-0.0429326	-0.038329
33.6	-0.0334368	-0.0303521	-0.0352822	-0.0406031	0.412457	0.375175	-0.0429334	-0.0384961
33.8	-0.032834	-0.0302279	-0.035938	-0.0404307	0.414811	0.37731	-0.0431498	-0.0385524
34	-0.0323239	-0.0305046	-0.0361457	-0.0404958	0.417177	0.379399	-0.0433105	-0.038457
34.2	-0.0324926	-0.0305879	-0.0364471	-0.0401029	0.419976	0.380922	-0.0438103	-0.038793
34.4	-0.0324461	-0.0308571	-0.0369225	-0.0399608	0.421941	0.383005	-0.0433759	-0.038906
34.6	-0.0325296	-0.0311698	-0.0372197	-0.0399587	0.4242	0.385053	-0.0437707	-0.038322
34.8	-0.0323914	-0.031633	-0.0376735	-0.039883	0.427152	0.38742	-0.0436951	-0.0381063
35	-0.0321339	-0.0318479	-0.0377019	-0.0396501	0.430007	0.38912	-0.0440214	-0.0381048
35.2	-0.0319672	-0.0325898	-0.0380808	-0.0398901	0.432724	0.391162	-0.043838	-0.0377821
35.4	-0.0327258	-0.0325938	-0.0382546	-0.0399686	0.435377	0.393181	-0.0441217	-0.0381572
35.6	-0.0325569	-0.0324449	-0.0384709	-0.0393708	0.43756	0.395125	-0.0438492	-0.0384666
35.8	-0.0330261	-0.0326659	-0.0385964	-0.0390014	0.439609	0.397021	-0.0437029	-0.0384253
36	-0.0338628	-0.0329768	-0.0385554	-0.0391276	0.441875	0.398877	-0.0433383	-0.0388437
36.2	-0.0343191	-0.0327653	-0.0384324	-0.0388329	0.443774	0.400365	-0.0437877	-0.0389952
36.4	-0.034907	-0.032838	-0.0381942	-0.0391152	0.445638	0.401923	-0.0437295	-0.0395451
36.6	-0.0355017	-0.0331749	-0.0377276	-0.0395159	0.44765	0.403711	-0.0438066	-0.0395965
36.8	-0.0359885	-0.0331135	-0.0373344	-0.0398676	0.449877	0.405188	-0.0443236	-0.0396117
37	-0.0358624	-0.032979	-0.0377973	-0.0401382	0.451925	0.407196	-0.0442409	-0.0396238
37.2	-0.0358094	-0.0331979	-0.0378714	-0.0397552	0.454007	0.409278	-0.0445033	-0.0394271
37.4	-0.0354911	-0.033434	-0.0378196	-0.0397278	0.456326	0.411433	-0.0449332	-0.0394162
37.6	-0.0350652	-0.0334044	-0.0376466	-0.0393638	0.458245	0.413697	-0.0451266	-0.0396591
37.8	-0.0349818	-0.0338893	-0.037977	-0.0395135	0.460408	0.416122	-0.04522	-0.0395791
38	-0.0345951	-0.0344485	-0.0379096	-0.0397768	0.462579	0.418871	-0.0453305	-0.0396583
38.2	-0.0345281	-0.0346906	-0.0380176	-0.0399208	0.46481	0.421045	-0.0453451	-0.039615
38.4	-0.0341849	-0.0346494	-0.0381762	-0.0402519	0.467132	0.423468	-0.0452165	-0.038998
38.6	-0.033891	-0.0347688	-0.038375	-0.0404476	0.469702	0.42559	-0.0456101	-0.0382526
38.8	-0.0338475	-0.0345284	-0.0381685	-0.0405306	0.472386	0.427957	-0.0459645	-0.0383017
39	-0.0335719	-0.0342245	-0.0384485	-0.0404561	0.474414	0.430285	-0.046318	-0.0383141
39.2	-0.0334035	-0.0342723	-0.0389714	-0.0404005	0.476252	0.432557	-0.046155	-0.0384518
39.4	-0.0330604	-0.0338109	-0.0388945	-0.0402635	0.478399	0.434735	-0.0459976	-0.038762
39.6	-0.0325049	-0.0335185	-0.0390586	-0.0396196	0.480415	0.436862	-0.0460171	-0.0386171
39.8	-0.0328959	-0.0337274	-0.0396397	-0.039658	0.482515	0.439041	-0.0461975	-0.0385095
40	-0.033779	-0.0338375	-0.0398353	-0.0395987	0.484849	0.441274	-0.046114	-0.0388959
40.2	-0.0337801	-0.0335357	-0.0398561	-0.0393886	0.486726	0.443461	-0.0463573	-0.038933
40.4	-0.0346056	-0.0337592	-0.0401549	-0.0396888	0.488682	0.445613	-0.0461471	-0.0392883
40.6	-0.0349331	-0.0338721	-0.0398891	-0.0397366	0.491002	0.447641	-0.0461686	-0.0391803
40.8	-0.0351973	-0.0337018	-0.0402533	-0.03972	0.492915	0.449567	-0.0459594	-0.0394388
41	-0.0354832	-0.034113	-0.0403487	-0.0400245	0.494956	0.451855	-0.0454572	-0.0396602
41.2	-0.0357474	-0.0343826	-0.0406352	-0.0400072	0.497027	0.453811	-0.0459223	-0.0395482
41.4	-0.0360817	-0.0346712	-0.0403512	-0.0401362	0.499077	0.455848	-0.0460702	-0.0395148
41.6	-0.0362277	-0.0349693	-0.0399178	-0.0404449	0.501358	0.457784	-0.0454694	-0.039831
41.8	-0.0359569	-0.0349006	-0.0394703	-0.040923	0.503692	0.459945	-0.0455406	-0.0402526
42	-0.0356978	-0.0351597	-0.0388939	-0.0411854	0.505915	0.462056	-0.0456408	-0.0404306
42.2	-0.0359479	-0.0350623	-0.0388564	-0.0417963	0.508459	0.463717	-0.0460834	-0.0402237
42.4	-0.0358374	-0.0346855	-0.0381016	-0.0418787	0.510885	0.465636	-0.0465472	-0.0403068
42.6	-0.0354074	-0.0342823	-0.0379582	-0.0420925	0.512698	0.467607	-0.0468653	-0.0402295
42.8	-0.0351554	-0.034341	-0.0376274	-0.0421473	0.514632	0.469228	-0.0473751	-0.0404152
43	-0.0347037	-0.0345586	-0.0376162	-0.0421044	0.516153	0.471346	-0.0473383	-0.0409701
43.2	-0.0344554	-0.035018	-0.0374163	-0.0419734	0.518265	0.473045	-0.0470189	-0.041181
43.4	-0.0342667	-0.0351427	-0.0374582	-0.0420135	0.520795	0.474969	-0.0469781	-0.0413057
43.6	-0.034393	-0.0354439	-0.0380084	-0.041663	0.523115	0.476946	-0.0471704	-0.0409483
43.8	-0.0344518	-0.0354927	-0.0384949	-0.0418393	0.525704	0.478932	-0.0473827	-0.0409768
44	-0.0343277	-0.0350993	-0.0388945	-0.0416287	0.52778	0.480709	-0.0471806	-0.0412625
44.2	-0.0340432	-0.0345113	-0.0390884	-0.0416117	0.530374	0.483077	-0.0470154	-0.0409157
44.4	-0.0340904	-0.0340951	-0.0398359	-0.0416666	0.532753	0.485252	-0.0469025	-0.0412327
44.6	-0.0335559	-0.0336169	-0.0399064	-0.0416285	0.534984	0.487358	-0.0469172	-0.0411152
44.8	-0.0338308	-0.0331896	-0.0401068	-0.0417845	0.536907	0.489141	-0.0467893	-0.0406333
45	-0.0338164	-0.0330728	-0.039811	-0.0421257	0.538943	0.490896	-0.0466018	-0.0401223
45.2	-0.0339432	-0.0329954	-0.0400481	-0.0421172	0.541333	0.492791	-0.0466219	-0.0398541
45.4	-0.0342487	-0.0329503	-0.0393392	-0.0425084	0.543634	0.494803	-0.0466386	-0.0398571
45.6	-0.0342682	-0.0326969	-0.0387961	-0.0430055	0.546111	0.496939	-0.0462948	-0.0403437
45.8	-0.0344942	-0.0327279	-0.0388152	-0.0431033	0.548839	0.499215	-0.0464876	-0.0403331
46	-0.0348203	-0.0330154	-0.0386455	-0.0434742	0.551199	0.501436	-0.0462557	-0.0402613
46.2	-0.0356748	-0.0333628	-0.0387064	-0.0438127	0.553551	0.503722	-0.0462806	-0.0396369
46.4	-0.0359502	-0.0333722	-0.0382405	-0.0436182	0.555212	0.505851	-0.046217	-0.039721
46.6	-0.0364101	-0.0343554	-0.0385105	-0.0436672	0.557012	0.50776	-0.0462708	-0.0396291
46.8	-0.0369764	-0.0357843	-0.0382772	-0.0434517	0.559202	0.50956	-0.0463592	-0.039524
47	-0.0373843	-0.0364194	-0.0383145	-0.0433323	0.561338	0.512079	-0.0462574	-0.0397239
47.2	-0.0375387	-0.0372088	-0.0385367	-0.0431697	0.563708	0.51363	-0.0459729	-0.0396356
47.4	-0.0377614	-0.0374927	-0.0389665	-0.0430708	0.566493	0.515443	-0.0457484	-0.0398257
47.6	-0.0377102	-0.0381555	-0.0391001	-0.0428366	0.568454	0.517151	-0.0458411	-0.0398145
47.8	-0.0375731	-0.03827	-0.0394033	-0.0429247	0.571084	0.519228	-0.0461058	-0.0402143
48	-0.0374126	-0.037788	-0.0399833	-0.0425388	0.573024	0.521172	-0.0458506	-0.04035
48.2	-0.037441	-0.0374623	-0.0406573	-0.0425634	0.575091	0.523624	-0.0459828	-0.0403012
48.4	-0.0373781	-0.0368814	-0.0412614	-0.0426054	0.576919	0.525554	-0.0466745	-0.0404132
48.6	-0.0372063	-0.0364261	-0.0414735	-0.0425416	0.578111	0.527483	-0.0473058	-0.0402549
48.8	-0.0368117	-0.0359101	-0.0414868	-0.0423083	0.580186	0.529197	-0.0473281	-0.0401331
49	-0.0365161	-0.0357129	-0.0413429	-0.0422093	0.582152	0.530888	-0.0475771	-0.0404407
49.2	-0.0366356	-0.0358945	-0.0417842	-0.0419252	0.584517	0.532812	-0.0475337	-0.0408384
49.4	-0.0367064	-0.0356803	-0.041839	-0.0421824	0.586298	0.534923	-0.0475167	-0.0413212
49.6	-0.0363464	-0.0356478	-0.0421325	-0.0421404	0.588148	0.536707	-0.0472502	-0.0418586
49.8	-0.0364211	-0.0359094	-0.0420907	-0.0423727	0.590643	0.538676	-0.0475217	-0.0422814
50	-0.0366064	-0.0357915	-0.0422275	-0.042246	0.592593	0.540291	-0.0473368	-0.0425958
50.2	-0.0370941	-0.0358846	-0.0420849	-0.0422086	0.594715	0.541843	-0.0475743	-0.0425884
50.4	-0.0368023	-0.0356862	-0.0418457	-0.0423858	0.596812	0.543377	-0.0481755	-0.0433826
50.6	-0.0366604	-0.0364168	-0.0418268	-0.0426178	0.598569	0.544805	-0.0479204	-0.0431775
50.8	-0.0366506	-0.0362179	-0.0417626	-0.0425295	0.600857	0.546421	-0.0480678	-0.0432229
51	-0.0364166	-0.0361805	-0.0411869	-0.0427206	0.602777	0.548089	-0.0481105	-0.0436059
51.2	-0.0362327	-0.036533	-0.0411984	-0.0428869	0.604715	0.549574	-0.0480795	-0.0439858
51.4	-0.0362506	-0.0367963	-0.0407474	-0.0432615	0.607493	0.551843	-0.0481067	-0.0440492
51.6	-0.0361647	-0.0370897	-0.0409089	-0.0438506	0.609283	0.553576	-0.0486582	-0.0438827
51.8	-0.036313	-0.0367097	-0.0410207	-0.0445257	0.611717	0.556029	-0.0488696	-0.0436496
52	-0.0368349	-0.0365601	-0.0413494	-0.0445974	0.613456	0.55783	-0.0486712	-0.0432893
52.2	-0.0371123	-0.0363755	-0.0414425	-0.0448526	0.615463	0.55971	-0.0489392	-0.0429794
52.4	-0.0371027	-0.0359808	-0.0410558	-0.0447561	0.617915	0.561585	-0.0493351	-0.0428236
52.6	-0.0371792	-0.0358571	-0.0409988	-0.0441404	0.619641	0.563698	-0.0493013	-0.0431899
52.8	-0.0374045	-0.0361271	-0.0406543	-0.0438611	0.622055	0.565294	-0.0490024	-0.0428415
53	-0.0380204	-0.0365888	-0.0405335	-0.044259	0.624265	0.566498	-0.0493144	-0.0426295
53.2	-0.0380421	-0.036805	-0.0403333	-0.0442159	0.626347	0.56793	-0.0490951	-0.042572
53.4	-0.0383616	-0.0367904	-0.0401604	-0.0445883	0.628059	0.569801	-0.0488565	-0.0427848
53.6	-0.0381647	-0.037224	-0.0397529	-0.045052	0.630104	0.571503	-0.0490488	-0.0429625
53.8	-0.0385246	-0.0373898	-0.0391751	-0.0455155	0.632303	0.57287	-0.0490122	-0.0434525
54	-0.0385624	-0.0371658	-0.0394103	-0.0452608	0.634274	0.574096	-0.0483439	-0.0436284
54.2	-0.0381251	-0.0373653	-0.0394533	-0.0453325	0.63647	0.575919	-0.0482424	-0.0435066
54.4	-0.0375621	-0.0377456	-0.0390074	-0.0459483	0.638111	0.577719	-0.0480889	-0.0438103
54.6	-0.037581	-0.0378831	-0.0393378	-0.0461261	0.639301	0.579681	-0.0476112	-0.0435966
54.8	-0.0376076	-0.037722	-0.0393001	-0.046242	0.6412	0.581872	-0.0477171	-0.0440514
55	-0.037278	-0.0381487	-0.0390874	-0.0465157	0.642866	0.583972	-0.0477525	-0.0441773
55.2	-0.0367538	-0.0382635	-0.0396813	-0.0467979	0.644779	0.586029	-0.0479859	-0.0440134
55.4	-0.0365848	-0.0379511	-0.0393597	-0.0467554	0.646985	0.58798	-0.0478943	-0.0437818
55.6	-0.0367341	-0.0379537	-0.0401382	-0.0470709	0.648404	0.589984	-0.0480136	-0.0437225
55.8	-0.0369624	-0.0379161	-0.0406105	-0.0470906	0.650488	0.592235	-0.0478478	-0.0437423
56	-0.0371235	-0.0381271	-0.0412023	-0.0463797	0.652596	0.593872	-0.0476461	-0.0434111
56.2	-0.0369811	-0.0377529	-0.0413029	-0.0461643	0.654358	0.596054	-0.0479409	-0.0432949
56.4	-0.03686	-0.0375362	-0.041391	-0.0457222	0.656653	0.597609	-0.0483123	-0.0430422
56.6	-0.0371857	-0.0374568	-0.0417794	-0.0452601	0.658584	0.599454	-0.0482972	-0.0427667
56.8	-0.0373824	-0.0375054	-0.0414067	-0.0450304	0.660636	0.600686	-0.0485516	-0.0425778
57	-0.0373213	-0.0372603	-0.0416587	-0.0451294	0.662889	0.601952	-0.048974	-0.0429254
57.2	-0.0370421	-0.03703	-0.0413961	-0.045003	0.665143	0.6038	-0.0494055	-0.0428022
57.4	-0.0373875	-0.0371919	-0.0413736	-0.0455547	0.667037	0.605744	-0.0497768	-0.0431455
57.6	-0.037108	-0.0375778	-0.041221	-0.0457256	0.669018	0.607443	-0.0502974	-0.0430718
57.8	-0.0370321	-0.0374836	-0.0412907	-0.0459334	0.670791	0.608347	-0.0501426	-0.042973
58	-0.0368708	-0.0376358	-0.0415304	-0.0452902	0.672761	0.610084	-0.0497304	-0.0431968
58.2	-0.0361742	-0.0382343	-0.0412019	-0.0453554	0.67493	0.611982	-0.0496313	-0.0430027
58.4	-0.036297	-0.0386196	-0.0403905	-0.0453448	0.676545	0.613817	-0.0499169	-0.0433555
58.6	-0.0363942	-0.038418	-0.040249	-0.0449012	0.678007	0.615838	-0.0497256	-0.0434594
58.8	-0.0360987	-0.0389987	-0.0397006	-0.0446965	0.679866	0.617423	-0.0494737	-0.043599
59	-0.0358896	-0.0392207	-0.0397072	-0.0444726	0.681945	0.618904	-0.0492796	-0.0434797
59.2	-0.035968	-0.0390059	-0.0398516	-0.0441888	0.683872	0.620354	-0.0488882	-0.0431662
59.4	-0.036412	-0.0390821	-0.0399967	-0.0442761	0.68611	0.621879	-0.0483296	-0.0436782
59.6	-0.0366692	-0.0397414	-0.0405132	-0.0448366	0.688212	0.623367	-0.0482745	-0.0437979
59.8	-0.0367081	-0.0398183	-0.0409247	-0.044972	0.690127	0.624953	-0.0483402	-0.0437503
60	-0.0367663	-0.039749	-0.0408704	-0.0449735	0.691813	0.626655	-0.0481979	-0.0437043
60.2	-0.036898	-0.0394837	-0.0410011	-0.0450915	0.693836	0.628005	-0.0482219	-0.0439968
60.4	-0.0372162	-0.0394043	-0.0410147	-0.0447258	0.696108	0.629254	-0.0483201	-0.0437551
60.6	-0.0373988	-0.0390452	-0.0414408	-0.044701	0.698143	0.631249	-0.0484692	-0.0443236
60.8	-0.0371564	-0.0387726	-0.0418882	-0.0445932	0.699818	0.632519	-0.0487093	-0.0453941
61	-0.0369286	-0.0387877	-0.0425507	-0.0455899	0.702092	0.634069	-0.0489438	-0.0456405
61.2	-0.0368793	-0.0387403	-0.0424403	-0.0463005	0.70418	0.636215	-0.0496339	-0.0452554
61.4	-0.0372895	-0.0392481	-0.0425682	-0.0466754	0.705655	0.638146	-0.0501213	-0.0454087
61.6	-0.0371848	-0.0395723	-0.0429282	-0.0468023	0.707451	0.640062	-0.0502853	-0.0450652
61.8	-0.0372978	-0.0396707	-0.0429827	-0.046436	0.709138	0.641829	-0.0504928	-0.0451677
62	-0.0370684	-0.0403528	-0.0428045	-0.0457554	0.710786	0.643725	-0.0506057	-0.0453092
62.2	-0.0368219	-0.0403517	-0.0423462	-0.0456646	0.712531	0.645636	-0.0512626	-0.0450412
62.4	-0.0371104	-0.0401766	-0.0419481	-0.0446478	0.714298	0.647795	-0.0518384	-0.0449809
62.6	-0.0365141	-0.0399388	-0.0417219	-0.044612	0.716356	0.649467	-0.051914	-0.0446767
62.8	-0.0365271	-0.0400767	-0.0415963	-0.0441013	0.718363	0.651297	-0.0520865	-0.0441955
63	-0.0367647	-0.0398789	-0.0415314	-0.0437821	0.720464	0.653081	-0.0523013	-0.0440205
63.2	-0.0371195	-0.0402581	-0.0415783	-0.0435544	0.722746	0.65493	-0.0522398	-0.0439015
63.4	-0.037423	-0.0406772	-0.0415656	-0.0435212	0.724891	0.656533	-0.0523872	-0.0438589
63.6	-0.0376917	-0.040424	-0.0411615	-0.0432525	0.726464	0.658148	-0.0524199	-0.0434327
63.8	-0.0379284	-0.0400936	-0.0410833	-0.0435168	0.728058	0.660204	-0.0522546	-0.0435598
64	-0.0383024	-0.0401475	-0.0409465	-0.0434868	0.730253	0.662182	-0.0518867	-0.0438755
64.2	-0.0386306	-0.0399285	-0.0411683	-0.0432939	0.732679	0.663759	-0.0515587	-0.0438712
64.4	-0.0387269	-0.0398342	-0.0408728	-0.0432949	0.734412	0.665546	-0.0514576	-0.0438348
64.6	-0.0387085	-0.0392265	-0.0413991	-0.0438449	0.736226	0.667391	-0.0509894	-0.0445806
64.8	-0.0385597	-0.0392085	-0.0416369	-0.0444118	0.738325	0.669148	-0.050821	-0.044993
65	-0.0389267	-0.0391253	-0.0417307	-0.0454078	0.740623	0.671192	-0.0508101	-0.0445798
65.2	-0.0393552	-0.039127	-0.0417629	-0.0460283	0.742525	0.673386	-0.0512123	-0.0442522
65.4	-0.0397198	-0.0393358	-0.0419176	-0.0464725	0.744707	0.675031	-0.0513183	-0.0448322
65.6	-0.039546	-0.0393977	-0.0420367	-0.0465005	0.747236	0.676669	-0.0515175	-0.0450327
65.8	-0.0397994	-0.0395195	-0.0421728	-0.0465973	0.749021	0.678076	-0.0515512	-0.0450656
66	-0.0394992	-0.0392487	-0.0425321	-0.0466847	0.750792	0.679175	-0.0516475	-0.0449459
66.2	-0.0395091	-0.0382163	-0.0424534	-0.0467304	0.752848	0.680542	-0.0520878	-0.0452478
66.4	-0.0389881	-0.0380822	-0.0424553	-0.0464002	0.754777	0.681838	-0.0524099	-0.0451412
66.6	-0.0385218	-0.0380903	-0.0426234	-0.0468139	0.756508	0.682961	-0.0524993	-0.0449056
66.8	-0.039055	-0.0379565	-0.0423668	-0.0464219	0.757791	0.684748	-0.0528985	-0.0448275
67	-0.0391208	-0.0383746	-0.0424558	-0.0461979	0.759141	0.686318	-0.0533535	-0.0447195
67.2	-0.0394339	-0.0389561	-0.0428765	-0.0459815	0.761056	0.687925	-0.0531681	-0.0448343
67.4	-0.0396862	-0.0391147	-0.0430456	-0.0457938	0.762037	0.689283	-0.0530537	-0.0444998
67.6	-0.0397383	-0.0389093	-0.0428693	-0.0460392	0.763078	0.690761	-0.0527064	-0.0447867
67.8	-0.0396631	-0.0393955	-0.0426938	-0.0464107	0.764629	0.69268	-0.0525982	-0.0449767
68	-0.0397123	-0.0393004	-0.0427259	-0.0462851	0.766593	0.694535	-0.0523423	-0.0449096
68.2	-0.0396968	-0.0389447	-0.0427677	-0.0459769	0.768061	0.696167	-0.0520439	-0.0448773
68.4	-0.0398855	-0.0391999	-0.0424568	-0.0459905	0.769342	0.697839	-0.0517997	-0.0448671
68.6	-0.0403962	-0.0393079	-0.0428265	-0.0465668	0.770729	0.699797	-0.0517718	-0.0447438
68.8	-0.0404796	-0.0394131	-0.0429735	-0.0470913	0.772998	0.701766	-0.051796	-0.0451441
69	-0.0408697	-0.0396676	-0.0427728	-0.0470963	0.774804	0.703638	-0.0516854	-0.0448858
69.2	-0.0412408	-0.0397941	-0.0425031	-0.047483	0.776396	0.705439	-0.0516611	-0.0452274
69.4	-0.0415323	-0.0398958	-0.0423778	-0.0473329	0.778531	0.707187	-0.0516458	-0.045907
69.6	-0.0419859	-0.0400216	-0.0426347	-0.0470552	0.780715	0.708783	-0.0516314	-0.0460015
69.8	-0.0422546	-0.0398357	-0.0430372	-0.0474529	0.78243	0.710648	-0.0515245	-0.0460415
70	-0.0418838	-0.0393702	-0.0433837	-0.0472238	0.784503	0.711959	-0.0517282	-0.0465199
70.2	-0.0415971	-0.0392352	-0.0432095	-0.0473901	0.786388	0.713535	-0.0521053	-0.0469848
70.4	-0.0411918	-0.039413	-0.0433965	-0.0475205	0.788152	0.714731	-0.0525776	-0.0469069
70.6	-0.0414789	-0.0391945	-0.0438301	-0.0478029	0.789963	0.716794	-0.0528814	-0.0468333
70.8	-0.0417466	-0.0392119	-0.0439511	-0.047516	0.791417	0.718329	-0.0536789	-0.046652
71	-0.0416495	-0.0393703	-0.0449058	-0.0474832	0.793263	0.719623	-0.0539076	-0.0466875
71.2	-0.0413341	-0.0399206	-0.0452695	-0.0473834	0.795179	0.721239	-0.0538344	-0.0468114
71.4	-0.040909	-0.0395042	-0.0450963	-0.0470445	0.796502	0.722858	-0.0540459	-0.0467814
71.6	-0.0401271	-0.0397379	-0.0448635	-0.0475197	0.798112	0.724393	-0.0543354	-0.0467507
71.8	-0.03969	-0.0396469	-0.0447194	-0.047637	0.800425	0.726246	-0.0544731	-0.0465686
72	-0.0394497	-0.0394572	-0.0448752	-0.0476265	0.802416	0.728083	-0.0542192	-0.0464478
72.2	-0.0388722	-0.0396551	-0.0446201	-0.0474705	0.803884	0.729923	-0.05428	-0.0462341
72.4	-0.0387925	-0.0401654	-0.0444493	-0.0478024	0.805458	0.731699	-0.0540882	-0.0460538
72.6	-0.0386891	-0.040479	-0.0442166	-0.047993	0.807636	0.733631	-0.0540669	-0.0459432
72.8	-0.0386588	-0.04061	-0.043569	-0.0479322	0.809813	0.735569	-0.0535521	-0.0463858
73	-0.0388704	-0.0409659	-0.0430124	-0.0473861	0.811308	0.737327	-0.0534501	-0.0458005
73.2	-0.038978	-0.0414351	-0.042875	-0.0472553	0.812966	0.738772	-0.0536973	-0.0460285
73.4	-0.0390201	-0.0417828	-0.0427471	-0.0470154	0.815006	0.739895	-0.0536411	-0.0457904
73.6	-0.0395922	-0.0421045	-0.0429161	-0.0473325	0.817207	0.741068	-0.0536176	-0.0462493
73.8	-0.0395185	-0.042299	-0.0429125	-0.0478013	0.819587	0.742359	-0.0534022	-0.0460843
74	-0.0395943	-0.0424707	-0.0431217	-0.0481418	0.821768	0.743166	-0.0535488	-0.0465582
74.2	-0.0396987	-0.0428087	-0.0431978	-0.0485256	0.823363	0.744535	-0.0539172	-0.0464639
74.4	-0.0395355	-0.042711	-0.0435849	-0.0486387	0.824966	0.745837	-0.0541262	-0.0463936
74.6	-0.0398602	-0.0428481	-0.0439532	-0.048522	0.826765	0.747309	-0.0541393	-0.0463011
74.8	-0.0395793	-0.0431909	-0.0443176	-0.0482995	0.828307	0.748181	-0.0542158	-0.0460235
75	-0.0397545	-0.042875	-0.0451184	-0.0484903	0.830065	0.749995	-0.0539433	-0.0461876
75.2	-0.0397276	-0.0430113	-0.0453533	-0.0481475	0.831963	0.751732	-0.0539251	-0.0461809
75.4	-0.0393887	-0.0426976	-0.0454989	-0.048306	0.833525	0.753033	-0.0537706	-0.0465988
75.6	-0.0392834	-0.0426843	-0.0456147	-0.0485781	0.835476	0.75438	-0.053708	-0.046661
75.8	-0.0391809	-0.0421155	-0.0454022	-0.0485472	0.837339	0.756356	-0.053617	-0.0473761
76	-0.0388417	-0.0419431	-0.0455677	-0.0483742	0.838722	0.758466	-0.0535679	-0.0472332
76.2	-0.038923	-0.0418584	-0.0456884	-0.0481616	0.840198	0.760351	-0.0534468	-0.0470489
76.4	-0.0393945	-0.0417528	-0.045928	-0.0476108	0.842329	0.762301	-0.0534403	-0.0472319
76.6	-0.0393528	-0.0416267	-0.0458642	-0.0471024	0.844451	0.763978	-0.053187	-0.0474526
76.8	-0.0394488	-0.0414025	-0.0460346	-0.0469163	0.845983	0.76554	-0.0530272	-0.047124
77	-0.0395054	-0.0412737	-0.0462834	-0.0463651	0.847595	0.766814	-0.0530092	-0.0469062
77.2	-0.0394579	-0.0412824	-0.0463727	-0.0462544	0.849573	0.767695	-0.053344	-0.0472553
77.4	-0.0400164	-0.0414164	-0.0460979	-0.0466892	0.851073	0.768577	-0.0530557	-0.046846
77.6	-0.0404598	-0.041571	-0.0459948	-0.0473594	0.852616	0.769968	-0.0530592	-0.0473841
77.8	-0.0402537	-0.0414286	-0.0459842	-0.0478064	0.854547	0.771481	-0.05309	-0.0473016
78	-0.0401335	-0.0415086	-0.0456642	-0.0483211	0.855958	0.772794	-0.0534798	-0.047648
78.2	-0.0397275	-0.0418514	-0.0455006	-0.0485159	0.857071	0.774429	-0.0539212	-0.0474858
78.4	-0.0394285	-0.0417168	-0.0449507	-0.0485643	0.858429	0.775556	-0.0536995	-0.0480439
78.6	-0.039823	-0.0420933	-0.0446156	-0.049032	0.859799	0.77661	-0.0537945	-0.0479385
78.8	-0.0397298	-0.0424533	-0.0444803	-0.0495164	0.861127	0.778291	-0.0539285	-0.0476229
79	-0.0402775	-0.042109	-0.044772	-0.049994	0.862494	0.779933	-0.0539795	-0.047722
79.2	-0.0404607	-0.0420848	-0.0444423	-0.0500439	0.864242	0.780824	-0.0542306	-0.0478448
79.4	-0.0402363	-0.0419685	-0.0441002	-0.0505848	0.865702	0.782113	-0.0544428	-0.0479532
79.6	-0.0402702	-0.0414445	-0.0435784	-0.0504659	0.867375	0.783691	-0.0552561	-0.0481101
79.8	-0.0404797	-0.041447	-0.0436619	-0.0506978	0.868708	0.785757	-0.0553873	-0.0484196
80	-0.0404412	-0.0413002	-0.0440399	-0.050813	0.870211	0.787041	-0.0557945	-0.0476572
80.2	-0.0408648	-0.0411789	-0.0443644	-0.0506552	0.872163	0.788701	-0.0561373	-0.0476966
80.4	-0.0410059	-0.040792	-0.0444751	-0.0505919	0.87433	0.790421	-0.0563307	-0.047891
80.6	-0.041406	-0.0405536	-0.0447098	-0.050719	0.875657	0.791913	-0.0563334	-0.0479803
80.8	-0.0419963	-0.0401445	-0.0450008	-0.050572	0.877439	0.793374	-0.0566463	-0.0474372
81	-0.0423244	-0.0405323	-0.0452563	-0.0500862	0.87942	0.794743	-0.0567111	-0.0478241
81.2	-0.0429065	-0.0406011	-0.0453443	-0.0502473	0.881238	0.796091	-0.0568391	-0.0479469
81.4	-0.0433833	-0.0407343	-0.0449927	-0.0503424	0.882975	0.798032	-0.0566916	-0.0477219
81.6	-0.0435978	-0.0406202	-0.0455087	-0.0501558	0.884863	0.799559	-0.0567409	-0.0479842
81.8	-0.0435501	-0.0407425	-0.0458353	-0.0504655	0.887081	0.801168	-0.056707	-0.0485097
82	-0.0434759	-0.0408322	-0.0453978	-0.0504328	0.888591	0.802406	-0.0567615	-0.0484942
82.2	-0.0437707	-0.0410858	-0.0457431	-0.0501395	0.890305	0.803868	-0.0566633	-0.0482863
82.4	-0.0439983	-0.0410113	-0.0453257	-0.0499138	0.891723	0.805222	-0.0557982	-0.0487265
82.6	-0.0441745	-0.0413534	-0.0454289	-0.0499998	0.893161	0.806549	-0.0555693	-0.0486166
82.8	-0.0441177	-0.0416077	-0.0453324	-0.0499309	0.895196	0.808342	-0.0554787	-0.0484776
83	-0.044123	-0.0415665	-0.0453455	-0.0500028	0.896857	0.809759	-0.0553887	-0.0482277
83.2	-0.0437096	-0.0415287	-0.0449767	-0.0501442	0.898838	0.810826	-0.0554538	-0.0481614
83.4	-0.0433563	-0.0416751	-0.0452805	-0.0504825	0.90044	0.812115	-0.0556221	-0.0481307
83.6	-0.0431214	-0.0417604	-0.0452514	-0.0504117	0.901585	0.81336	-0.0557915	-0.0484353
83.8	-0.0430328	-0.0417059	-0.045788	-0.0506194	0.902736	0.814923	-0.0552851	-0.0484706
84	-0.0422885	-0.0416183	-0.0456032	-0.0508533	0.904452	0.816109	-0.0554686	-0.0483165
84.2	-0.0422289	-0.0414311	-0.0457849	-0.0507912	0.90608	0.817408	-0.0556342	-0.0484345
84.4	-0.0422643	-0.0415974	-0.0458789	-0.0512924	0.907773	0.818665	-0.0554654	-0.0483707
84.6	-0.0423906	-0.041622	-0.0460897	-0.0513234	0.909212	0.820042	-0.0555414	-0.0483931
84.8	-0.0421747	-0.0418092	-0.0462461	-0.051166	0.910965	0.821664	-0.0554064	-0.0483535
85	-0.0418921	-0.0423611	-0.0463309	-0.0511646	0.912968	0.823523	-0.0551109	-0.0484621
85.2	-0.0421172	-0.042395	-0.046326	-0.0511976	0.914389	0.825136	-0.0552979	-0.048206
85.4	-0.0422977	-0.0426348	-0.0465106	-0.0510167	0.916362	0.826973	-0.0553393	-0.0479676
85.6	-0.0422983	-0.0430089	-0.0472528	-0.0511906	0.918364	0.828058	-0.0553775	-0.0479669
85.8	-0.041763	-0.0430716	-0.0471357	-0.0512861	0.920134	0.829442	-0.0553	-0.0482155
86	-0.041877	-0.042736	-0.0469296	-0.0506762	0.921668	0.830696	-0.0550307	-0.0477484
86.2	-0.0425725	-0.0428135	-0.0470836	-0.0501672	0.923299	0.831838	-0.055023	-0.047399
86.4	-0.042304	-0.042742	-0.0466715	-0.0496841	0.924648	0.833292	-0.0551352	-0.0477302
86.6	-0.0426357	-0.0430108	-0.0463663	-0.0496334	0.926239	0.834602	-0.0555633	-0.0478359
86.8	-0.0427497	-0.0431953	-0.0457003	-0.0497005	0.927772	0.836289	-0.0559122	-0.0480201
87	-0.0427632	-0.043171	-0.0457386	-0.0495414	0.9294	0.837424	-0.0561519	-0.0479419
87.2	-0.0430529	-0.0432201	-0.0456691	-0.0496047	0.930981	0.83858	-0.0562372	-0.0482369
87.4	-0.0434507	-0.0433699	-0.045775	-0.0491561	0.932143	0.839619	-0.0560913	-0.0489247
87.6	-0.0433712	-0.0432531	-0.0455745	-0.0485637	0.933488	0.841103	-0.0561683	-0.0492652
87.8	-0.0431347	-0.0430421	-0.0457811	-0.048721	0.934993	0.842297	-0.0562435	-0.0495742
88	-0.0429858	-0.0426496	-0.0456197	-0.0486438	0.93689	0.843296	-0.0564434	-0.0494398
88.2	-0.0429572	-0.0426502	-0.0458089	-0.0487686	0.938265	0.844282	-0.056665	-0.0492295
88.4	-0.0426193	-0.0430053	-0.0459806	-0.0487418	0.940219	0.84532	-0.0567486	-0.0494395
88.6	-0.0424993	-0.0429429	-0.0459533	-0.0487149	0.941698	0.846928	-0.0568401	-0.0496084
88.8	-0.0419714	-0.0429829	-0.0463073	-0.0491418	0.943225	0.848684	-0.0565693	-0.0497025
89	-0.0415618	-0.0429569	-0.0460815	-0.0495403	0.944947	0.850528	-0.0566601	-0.0494813
89.2	-0.0412847	-0.0431896	-0.0461858	-0.0494942	0.946487	0.851753	-0.0564965	-0.0495801
89.4	-0.041001	-0.0428529	-0.0463276	-0.0498817	0.948322	0.85328	-0.0564409	-0.0494541
89.6	-0.0407494	-0.0426823	-0.0463056	-0.0502382	0.949958	0.854464	-0.0567139	-0.0497363
89.8	-0.0407116	-0.042574	-0.0460588	-0.0501368	0.951036	0.855988	-0.0566951	-0.0496846
90	-0.0411352	-0.0421152	-0.0459848	-0.0502202	0.952484	0.85723	-0.0565312	-0.048855
90.2	-0.0413532	-0.0423649	-0.0457246	-0.0504568	0.953437	0.858178	-0.057334	-0.04869
90.4	-0.0410281	-0.0426964	-0.0450332	-0.0507412	0.955265	0.859773	-0.0574376	-0.04859
90.6	-0.0416054	-0.0427881	-0.045367	-0.0516357	0.956552	0.861015	-0.0574681	-0.0488073
90.8	-0.0418047	-0.0430479	-0.0453912	-0.0519947	0.957787	0.862252	-0.0575671	-0.048957
91	-0.0422102	-0.04336	-0.0458243	-0.0521907	0.959558	0.863268	-0.0574195	-0.048807
91.2	-0.0426583	-0.0435947	-0.0459364	-0.0523633	0.96089	0.864408	-0.0572891	-0.0485751
91.4	-0.0431137	-0.0438193	-0.0460569	-0.0524819	0.962144	0.865411	-0.0574386	-0.0486046
91.6	-0.0430472	-0.0440913	-0.0464095	-0.0527895	0.963952	0.866846	-0.0574507	-0.0481079
91.8	-0.0436345	-0.0442781	-0.0470809	-0.0533606	0.965507	0.86797	-0.0570555	-0.0475471
92	-0.0439966	-0.0445961	-0.0474188	-0.053507	0.967132	0.869669	-0.0568732	-0.0474844
92.2	-0.0441976	-0.0453641	-0.0478896	-0.0536475	0.96876	0.870919	-0.0568461	-0.0476227
92.4	-0.0443079	-0.0458657	-0.0482534	-0.0532418	0.9703	0.871892	-0.0568342	-0.048102
92.6	-0.0446011	-0.0456451	-0.0484512	-0.0533129	0.971742	0.874117	-0.0567225	-0.0485572
92.8	-0.0443964	-0.045686	-0.0489628	-0.0533756	0.973368	0.875793	-0.056714	-0.0488883
93	-0.0444405	-0.0457612	-0.0481878	-0.0532246	0.974664	0.877251	-0.0567264	-0.0494511
93.2	-0.0443169	-0.0459472	-0.0482558	-0.0528715	0.976106	0.87806	-0.0565386	-0.0498955
93.4	-0.0439567	-0.0458396	-0.0481807	-0.052502	0.977619	0.879793	-0.056618	-0.0499605
93.6	-0.0441087	-0.0460477	-0.0481621	-0.0522898	0.979058	0.881019	-0.0566687	-0.0505542
93.8	-0.0439354	-0.0461326	-0.0483263	-0.0515962	0.980443	0.882697	-0.0570134	-0.0503901
94	-0.0433537	-0.0457532	-0.048072	-0.0513682	0.982174	0.883911	-0.0570268	-0.0501504
94.2	-0.0430477	-0.0459389	-0.0476877	-0.0509778	0.983282	0.885132	-0.0575781	-0.050298
94.4	-0.0425199	-0.0459319	-0.0471479	-0.0504448	0.985066	0.886492	-0.0575669	-0.0503524
94.6	-0.0424693	-0.0459695	-0.0476948	-0.0504129	0.986028	0.887273	-0.0577279	-0.0506472
94.8	-0.0421837	-0.0461233	-0.0475336	-0.0501127	0.987568	0.888599	-0.0581147	-0.0505474
95	-0.0420907	-0.0460362	-0.0473117	-0.0500438	0.989559	0.889731	-0.0578543	-0.0501163
95.2	-0.0420145	-0.0455418	-0.0468184	-0.0499456	0.991062	0.890963	-0.0583468	-0.0494177
95.4	-0.0422252	-0.0459116	-0.0468384	-0.0502519	0.992653	0.892418	-0.0583222	-0.0492982
95.6	-0.0421818	-0.0458137	-0.0469769	-0.050349	0.994479	0.893723	-0.057991	-0.0488513
95.8	-0.0425281	-0.0457032	-0.0472327	-0.0508602	0.995774	0.895311	-0.0576461	-0.048638
96	-0.0424812	-0.0460262	-0.0468509	-0.0514563	0.996855	0.896997	-0.0577365	-0.0485963
96.2	-0.0428171	-0.0461049	-0.0466635	-0.0517331	0.998241	0.897721	-0.0580701	-0.0483639
96.4	-0.042831	-0.0459611	-0.0463887	-0.0517927	0.99929	0.899222	-0.0581214	-0.0487056
96.6	-0.0432633	-0.0456514	-0.0462254	-0.0525501	1.00041	0.901058	-0.0583356	-0.0488318
96.8	-0.0430182	-0.0457147	-0.0463794	-0.0527189	1.00233	0.902197	-0.0586989	-0.0489899
97	-0.0425232	-0.0455986	-0.0456206	-0.0530718	1.00347	0.902796	-0.0585319	-0.0498941
97.2	-0.0421295	-0.0457771	-0.0462685	-0.052966	1.00512	0.903991	-0.0585752	-0.0502459
97.4	-0.0421247	-0.0460704	-0.0462088	-0.0529337	1.00698	0.9057	-0.0585678	-0.0504192
97.6	-0.0427456	-0.0463767	-0.0466517	-0.0533737	1.00814	0.906917	-0.0586759	-0.0510031
97.8	-0.0428838	-0.0464615	-0.0463481	-0.0534922	1.00978	0.908671	-0.0590575	-0.0508935
98	-0.0426461	-0.0462857	-0.04608	-0.0534257	1.0117	0.910043	-0.0587908	-0.051109
98.2	-0.0427377	-0.0465206	-0.0460895	-0.0529606	1.01302	0.91117	-0.0589643	-0.0514296
98.4	-0.0425468	-0.0466034	-0.0461597	-0.0526385	1.01455	0.911868	-0.0592558	-0.0521576
98.6	-0.0427795	-0.046804	-0.0465421	-0.0529161	1.01633	0.91334	-0.0596083	-0.0522046
98.8	-0.0429149	-0.0468177	-0.0467171	-0.0526459	1.01788	0.914516	-0.0596721	-0.0520452
99	-0.0427126	-0.046909	-0.0465048	-0.0529532	1.01935	0.915371	-0.0593391	-0.0521724
99.2	-0.0425077	-0.0467675	-0.0462995	-0.052767	1.02032	0.916815	-0.0598243	-0.0521566
99.4	-0.0427039	-0.0469998	-0.0466968	-0.0525752	1.0213	0.917923	-0.0593657	-0.0527334
99.6	-0.0427881	-0.0474295	-0.0465349	-0.0528113	1.02233	0.919437	-0.0592738	-0.0523534
99.8	-0.0423871	-0.0471293	-0.0466133	-0.0531305	1.0232	0.921113	-0.05925	-0.0520157
100	-0.0425288	-0.0475025	-0.0466453	-0.0532069	1.02455	0.922306	-0.0589879	-0.0513908
100.2	-0.0426571	-0.0474343	-0.0469488	-0.0531945	1.02575	0.923335	-0.0587461	-0.0513469
100.4	-0.0428201	-0.0473523	-0.0472334	-0.0531315	1.0267	0.924796	-0.058624	-0.0513814
100.6	-0.0433248	-0.0472592	-0.0471	-0.0536074	1.02767	0.926004	-0.0585424	-0.0511844
100.8	-0.0429715	-0.0469447	-0.0469461	-0.0532608	1.02976	0.926634	-0.0586742	-0.0508442
101	-0.0427478	-0.0470313	-0.0464961	-0.0534241	1.03092	0.927479	-0.05866	-0.0509776
101.2	-0.0434318	-0.0470795	-0.0471157	-0.0536465	1.03216	0.928886	-0.0584064	-0.050652
101.4	-0.0441506	-0.0475023	-0.0467561	-0.0541845	1.03372	0.930197	-0.0581103	-0.0504289
101.6	-0.0442826	-0.0475371	-0.0467074	-0.0545746	1.03522	0.931596	-0.0579723	-0.0502381
101.8	-0.0441943	-0.0474309	-0.0458185	-0.0545912	1.03737	0.933057	-0.0578543	-0.050112
102	-0.0435902	-0.0473612	-0.0460526	-0.0541908	1.03894	0.934247	-0.0581178	-0.0503958
102.2	-0.0431375	-0.0477598	-0.0462328	-0.0542291	1.0402	0.935326	-0.0581947	-0.0506684
102.4	-0.0428346	-0.0476283	-0.0464792	-0.0543783	1.0415	0.936607	-0.0589433	-0.0508486
102.6	-0.042601	-0.0476488	-0.0462946	-0.054467	1.04339	0.937864	-0.0587098	-0.0508833
102.8	-0.0426037	-0.0477136	-0.0460835	-0.0543916	1.04495	0.939031	-0.058397	-0.0513463
103	-0.0423455	-0.0478165	-0.0457525	-0.0545522	1.04656	0.94031	-0.0586343	-0.0520083
103.2	-0.0420766	-0.0474588	-0.0458133	-0.053993	1.04793	0.941816	-0.0588433	-0.0521676
103.4	-0.042206	-0.0473455	-0.045988	-0.0539549	1.04942	0.942784	-0.0581984	-0.0526091
103.6	-0.0422396	-0.0477364	-0.0459506	-0.0539253	1.05087	0.94452	-0.0582348	-0.0524844
103.8	-0.0420422	-0.0470599	-0.0462619	-0.0535937	1.05246	0.945665	-0.0583673	-0.0529301
104	-0.0424754	-0.0472168	-0.046804	-0.0530467	1.05419	0.946977	-0.0580332	-0.0530076
104.2	-0.0427598	-0.0473288	-0.047235	-0.0525964	1.05521	0.947862	-0.0581086	-0.0533923
104.4	-0.0431456	-0.0472913	-0.0475452	-0.05219	1.05663	0.949031	-0.0584131	-0.0531853
104.6	-0.0436581	-0.0468099	-0.0476235	-0.0517992	1.05867	0.949717	-0.057997	-0.0530185
104.8	-0.0433253	-0.0463003	-0.048066	-0.0519833	1.06063	0.950515	-0.0582876	-0.0525398
105	-0.0438311	-0.0468276	-0.0486622	-0.0517821	1.06165	0.95167	-0.058313	-0.052653
105.2	-0.0442616	-0.0471329	-0.0494722	-0.0519156	1.06281	0.952993	-0.0581632	-0.0525832
105.4	-0.0445846	-0.0474325	-0.049555	-0.0519121	1.06414	0.954887	-0.0586026	-0.0523047
105.6	-0.0443183	-0.0471653	-0.0497263	-0.0515471	1.06551	0.956261	-0.0588596	-0.0521874
105.8	-0.0446602	-0.0477002	-0.0497749	-0.0515637	1.06718	0.957717	-0.0587375	-0.0524979
106	-0.0446556	-0.0480883	-0.0498804	-0.0514889	1.06834	0.959041	-0.0591735	-0.0519829
106.2	-0.0447671	-0.0482779	-0.0497869	-0.0517442	1.06988	0.960272	-0.0589875	-0.0516357
106.4	-0.0449775	-0.0479928	-0.0497165	-0.051977	1.07155	0.961009	-0.0593262	-0.0516404
106.6	-0.045018	-0.0478888	-0.0494785	-0.0524752	1.07347	0.962067	-0.0584815	-0.0519208
106.8	-0.0453885	-0.0476656	-0.0492331	-0.0524503	1.07494	0.963826	-0.0585461	-0.0520654
107	-0.0453853	-0.0478409	-0.0489176	-0.0524761	1.07622	0.964959	-0.0584815	-0.0521517
107.2	-0.0451001	-0.0472887	-0.048644	-0.0526458	1.07764	0.966681	-0.0580789	-0.0522333
107.4	-0.0455791	-0.0474204	-0.0475793	-0.0531391	1.07895	0.967922	-0.0579376	-0.0521809
107.6	-0.0455396	-0.0476975	-0.0473719	-0.0531731	1.08028	0.969424	-0.0582889	-0.0521508
107.8	-0.0448963	-0.0477505	-0.0468926	-0.053379	1.08196	0.970287	-0.0584161	-0.0527412
108	-0.0448942	-0.0482003	-0.0465392	-0.0534175	1.08317	0.971775	-0.0586859	-0.052915
108.2	-0.0445099	-0.0485589	-0.0463944	-0.053205	1.08483	0.972695	-0.0587272	-0.052947
108.4	-0.0445439	-0.0486262	-0.0465734	-0.0533606	1.08648	0.974064	-0.0589062	-0.0532036
108.6	-0.0446911	-0.0487452	-0.0465184	-0.0534242	1.08813	0.974774	-0.0588359	-0.0536548
108.8	-0.0444024	-0.0491993	-0.0464782	-0.0539105	1.0892	0.976033	-0.0591724	-0.0534736
109	-0.0446141	-0.049501	-0.0467471	-0.0536298	1.08994	0.977223	-0.0597731	-0.0532526
109.2	-0.0442998	-0.0494844	-0.0472242	-0.0541165	1.091	0.97875	-0.0604262	-0.0530758
109.4	-0.0443794	-0.0492234	-0.0475391	-0.0543311	1.09191	0.980025	-0.0608113	-0.0531015
109.6	-0.0445062	-0.0491206	-0.0477072	-0.0540599	1.09329	0.980884	-0.0606821	-0.0533088
109.8	-0.0449084	-0.0493986	-0.0479322	-0.0541734	1.0943	0.982183	-0.0607307	-0.0529865
110	-0.0450346	-0.0491803	-0.0481632	-0.0542001	1.09506	0.983527	-0.0606636	-0.0528514
110.2	-0.0449259	-0.0489084	-0.048505	-0.0545205	1.09605	0.98421	-0.0604821	-0.0527471
110.4	-0.0452401	-0.0485801	-0.0490018	-0.0547783	1.097	0.984914	-0.060701	-0.0526678
110.6	-0.0453951	-0.0481684	-0.0492745	-0.0546897	1.09793	0.9864	-0.0604356	-0.0526729
110.8	-0.0457777	-0.0478896	-0.0494173	-0.0540632	1.09851	0.988107	-0.0605614	-0.0523704
111	-0.0458488	-0.0478278	-0.0495327	-0.0541892	1.09951	0.989585	-0.0602203	-0.0523401
111.2	-0.0458618	-0.0476015	-0.0496451	-0.0545417	1.10051	0.990914	-0.0603951	-0.0523358
111.4	-0.0463423	-0.0479679	-0.0500338	-0.0543697	1.10155	0.991365	-0.0607532	-0.052073
111.6	-0.0460698	-0.0480174	-0.050585	-0.0542561	1.10288	0.992067	-0.0608765	-0.0521901
111.8	-0.0458062	-0.0481783	-0.0502954	-0.0541737	1.10428	0.992887	-0.0614311	-0.0525952
112	-0.0461093	-0.0483498	-0.0501721	-0.0542036	1.10558	0.994098	-0.0616874	-0.052514
112.2	-0.0457922	-0.0482419	-0.0502556	-0.0541465	1.10714	0.994896	-0.0616562	-0.0523217
112.4	-0.0457458	-0.0483292	-0.0498813	-0.0542478	1.10817	0.995988	-0.0617964	-0.0528132
112.6	-0.045805	-0.0485436	-0.049402	-0.0540866	1.1098	0.996979	-0.0616418	-0.052527
112.8	-0.045772	-0.0489094	-0.0492318	-0.0540406	1.11132	0.998266	-0.0616751	-0.0521887
113	-0.0456762	-0.0482525	-0.0492198	-0.0544359	1.11245	0.999694	-0.0618015	-0.0521345
113.2	-0.045438	-0.0482985	-0.0491788	-0.0547597	1.11429	1.00098	-0.0612385	-0.0522916
113.4	-0.0451981	-0.0480589	-0.0493187	-0.0546209	1.11604	1.00208	-0.0605532	-0.0526191
113.6	-0.0455823	-0.047884	-0.049123	-0.0547401	1.11785	1.00369	-0.0601613	-0.0525989
113.8	-0.0457803	-0.0481082	-0.0489563	-0.0550437	1.11933	1.00516	-0.0600248	-0.0523295
114	-0.0461883	-0.0482722	-0.0486909	-0.0552982	1.12104	1.00651	-0.0598095	-0.0525808
114.2	-0.0464934	-0.0482276	-0.0486239	-0.0552783	1.1227	1.00705	-0.0595849	-0.0521725
114.4	-0.0469162	-0.0483199	-0.0488235	-0.0552196	1.12426	1.00826	-0.0597078	-0.0523602
114.6	-0.0470996	-0.0482654	-0.0490736	-0.0546257	1.12561	1.0097	-0.05995	-0.0526863
114.8	-0.0473683	-0.0483153	-0.0494797	-0.0542852	1.12658	1.01106	-0.0599963	-0.0528837
115	-0.0471756	-0.0483129	-0.0497947	-0.0545521	1.12809	1.01191	-0.0603122	-0.0531575
115.2	-0.0471737	-0.0487545	-0.0503257	-0.0543471	1.12921	1.01264	-0.0608365	-0.0533961
115.4	-0.0472574	-0.049105	-0.0507493	-0.0536251	1.13026	1.0135	-0.0616802	-0.0532617
115.6	-0.0469216	-0.0490754	-0.0505767	-0.0538886	1.13104	1.01432	-0.0625904	-0.0531812
115.8	-0.0470931	-0.0494447	-0.0503403	-0.0539623	1.13209	1.01527	-0.063532	-0.0531221
116	-0.0470428	-0.0498207	-0.0500746	-0.0543266	1.13348	1.016	-0.0636421	-0.0526594
116.2	-0.0467528	-0.0498886	-0.0502275	-0.0544678	1.13429	1.01674	-0.0640316	-0.0528677
116.4	-0.0465016	-0.0496984	-0.0497054	-0.0541774	1.13502	1.01787	-0.0642843	-0.0528788
116.6	-0.0470479	-0.0500828	-0.0498185	-0.0542544	1.13588	1.01902	-0.0641834	-0.0526392
116.8	-0.0472402	-0.0503709	-0.0498946	-0.0543484	1.13682	1.02047	-0.0639625	-0.0528428
117	-0.0468063	-0.0499326	-0.0498488	-0.0547156	1.1378	1.02176	-0.0634381	-0.0527126
117.2	-0.0466106	-0.0499985	-0.049967	-0.0543913	1.13888	1.02264	-0.0630371	-0.0526338
117.4	-0.0466221	-0.0496625	-0.0500086	-0.0543736	1.13993	1.0235	-0.0625872	-0.0527029
117.6	-0.0469048	-0.0498215	-0.0493217	-0.0545578	1.141	1.02505	-0.0622461	-0.0527198
117.8	-0.0467183	-0.050268	-0.0495433	-0.0540998	1.14259	1.02625	-0.0620403	-0.0526658
118	-0.0468062	-0.049799	-0.049704	-0.0538538	1.14352	1.02718	-0.0616151	-0.0532802
118.2	-0.047	-0.0492896	-0.0498822	-0.0536726	1.14492	1.02796	-0.0612955	-0.053464
118.4	-0.0470843	-0.0494386	-0.0500574	-0.0536146	1.14637	1.0294	-0.0615622	-0.0539228
118.6	-0.0469881	-0.0492882	-0.050205	-0.053511	1.14768	1.03049	-0.0616039	-0.0538873
118.8	-0.0469511	-0.049441	-0.0503088	-0.053615	1.14854	1.03161	-0.0617417	-0.0538568
119	-0.0464436	-0.0495848	-0.0507211	-0.0538428	1.15006	1.03335	-0.0620879	-0.053814
119.2	-0.0463494	-0.0499416	-0.0507385	-0.0539448	1.15102	1.03473	-0.0627223	-0.0542091
119.4	-0.0461115	-0.0500527	-0.0503688	-0.054553	1.15254	1.0361	-0.0635961	-0.0543213
119.6	-0.0461809	-0.0502388	-0.0498025	-0.0554513	1.15397	1.03744	-0.064008	-0.0545723
119.8	-0.046356	-0.0506385	-0.049905	-0.0558953	1.15634	1.03873	-0.0637553	-0.0545137
120	-0.0463312	-0.0508677	-0.0502706	-0.0565303	1.15848	1.03982	-0.0635317	-0.0544466
120.2	-0.0463108	-0.0502683	-0.0504974	-0.0564593	1.16001	1.04088	-0.0634708	-0.0550219
120.4	-0.0461539	-0.0499457	-0.0503899	-0.0562505	1.16126	1.04214	-0.0633603	-0.0554216
120.6	-0.0464308	-0.0501962	-0.0509546	-0.0562041	1.16265	1.04333	-0.0631795	-0.0555753
120.8	-0.0462947	-0.0504667	-0.0512844	-0.055947	1.16411	1.04468	-0.0630555	-0.0559051
121	-0.045805	-0.0504517	-0.0515455	-0.05607	1.16488	1.04526	-0.0628231	-0.0553044
121.2	-0.0459198	-0.0503215	-0.0517649	-0.0556357	1.16592	1.04599	-0.0625696	-0.0553904
121.4	-0.0458553	-0.0503858	-0.051871	-0.0554873	1.16729	1.04636	-0.0620099	-0.055911
121.6	-0.0460004	-0.0508766	-0.0517198	-0.0548476	1.1684	1.04685	-0.0615228	-0.0555122
121.8	-0.045934	-0.0509136	-0.0523715	-0.0545708	1.16961	1.04702	-0.0614824	-0.0553406
122	-0.0462704	-0.0506238	-0.0523614	-0.0544962	1.17019	1.04754	-0.0615197	-0.055356
122.2	-0.0462134	-0.0507518	-0.0518718	-0.0541874	1.17157	1.04805	-0.061513	-0.0550073
122.4	-0.0461269	-0.0510021	-0.0518661	-0.0542177	1.17271	1.04887	-0.0615445	-0.0548768
122.6	-0.046003	-0.051007	-0.0517827	-0.0543782	1.17343	1.04979	-0.0618618	-0.054422
122.8	-0.0457543	-0.0512144	-0.051854	-0.0542733	1.17423	1.05121	-0.0617746	-0.0541654
123	-0.0458203	-0.0509939	-0.0517877	-0.0544196	1.17573	1.05285	-0.0619056	-0.0544983
123.2	-0.0454143	-0.0507221	-0.0514616	-0.0548935	1.17636	1.05405	-0.0623493	-0.0551934
123.4	-0.0450487	-0.0507597	-0.0512525	-0.0553693	1.17787	1.05569	-0.0621463	-0.0553399
123.6	-0.0452011	-0.0508217	-0.0511265	-0.0555867	1.17906	1.05722	-0.0620356	-0.0553656
123.8	-0.0452356	-0.0506042	-0.0516559	-0.0558113	1.18099	1.0586	-0.0621163	-0.0553242
124	-0.0455662	-0.050446	-0.0517159	-0.0554663	1.18205	1.05966	-0.0626692	-0.0557391
124.2	-0.0457317	-0.0501073	-0.0520177	-0.0553956	1.18343	1.06099	-0.0629066	-0.0561136
124.4	-0.0458076	-0.0501248	-0.0525362	-0.0557006	1.18419	1.06237	-0.062872	-0.056436
124.6	-0.0462059	-0.0502876	-0.0528966	-0.0559125	1.18562	1.06357	-0.0630251	-0.05621
124.8	-0.046643	-0.0505131	-0.0536177	-0.0559645	1.18635	1.06492	-0.0629468	-0.0561258
125	-0.0468132	-0.0508978	-0.0535364	-0.0563387	1.18715	1.06571	-0.0626672	-0.0557185
125.2	-0.0470041	-0.050932	-0.0537281	-0.056288	1.18842	1.0666	-0.0623361	-0.0559423
125.4	-0.0471007	-0.0512055	-0.0537899	-0.0564952	1.18932	1.06723	-0.06241	-0.0558662
125.6	-0.0473373	-0.0514816	-0.053461	-0.0562414	1.19013	1.06801	-0.0625871	-0.0546605
125.8	-0.0471366	-0.0515295	-0.0533349	-0.0564134	1.19097	1.06913	-0.0631434	-0.0550232
126	-0.0470417	-0.051938	-0.0531863	-0.0562939	1.19217	1.07031	-0.0634675	-0.054815
126.2	-0.0469179	-0.0519153	-0.0529453	-0.055996	1.1933	1.07139	-0.0633848	-0.0544909
126.4	-0.0469296	-0.0516987	-0.0532994	-0.0561021	1.19464	1.07196	-0.0633684	-0.0545886
126.6	-0.0466475	-0.0517413	-0.0535113	-0.0563268	1.19568	1.07306	-0.0635457	-0.0542261
126.8	-0.0462832	-0.0516558	-0.0534747	-0.0558002	1.19702	1.07393	-0.0630291	-0.0542521
127	-0.0459358	-0.0513431	-0.0534198	-0.0558516	1.19847	1.075	-0.0635809	-0.0545188
127.2	-0.0452501	-0.0509996	-0.0537203	-0.0560359	1.19967	1.07622	-0.0634906	-0.0543965
127.4	-0.0450857	-0.050774	-0.0535973	-0.055839	1.20159	1.07688	-0.0632444	-0.0544394
127.6	-0.0452285	-0.0507667	-0.0535423	-0.0555588	1.20358	1.0774	-0.0638148	-0.0541231
127.8	-0.0457099	-0.0505534	-0.0535923	-0.0554425	1.20497	1.07817	-0.0640667	-0.0543153
128	-0.0460079	-0.050602	-0.0537436	-0.0553396	1.20665	1.07883	-0.0639856	-0.0543948
128.2	-0.046175	-0.0502669	-0.0539457	-0.0559615	1.20858	1.0801	-0.0637341	-0.0549905
128.4	-0.0462402	-0.0501111	-0.053705	-0.0562907	1.20969	1.08128	-0.0634208	-0.0552214
128.6	-0.0462411	-0.0502022	-0.0534718	-0.0561794	1.21123	1.08224	-0.0634701	-0.0555005
128.8	-0.0462492	-0.0501093	-0.0533296	-0.0566005	1.21209	1.08323	-0.0632748	-0.0558686
129	-0.0461087	-0.050146	-0.052602	-0.0569884	1.21286	1.08431	-0.0633797	-0.0562211
129.2	-0.0457093	-0.0496284	-0.0527663	-0.0573079	1.21402	1.08537	-0.063764	-0.056566
129.4	-0.0457165	-0.0496395	-0.0522243	-0.0575112	1.21495	1.08617	-0.0643911	-0.0564778
129.6	-0.0457841	-0.0497633	-0.0516605	-0.0575654	1.21574	1.08699	-0.0644242	-0.0567952
129.8	-0.0456093	-0.0498	-0.0517956	-0.0578678	1.21646	1.08766	-0.0643473	-0.0572144
130	-0.0459931	-0.0499782	-0.0521607	-0.0577265	1.21782	1.08833	-0.064279	-0.0568771
130.2	-0.0460744	-0.0497734	-0.0524585	-0.0579989	1.21844	1.08901	-0.0643868	-0.0568317
130.4	-0.0461196	-0.0498973	-0.0527209	-0.0578263	1.21942	1.08926	-0.064221	-0.0564897
130.6	-0.0456948	-0.0500339	-0.0527724	-0.0582214	1.21997	1.09014	-0.0644894	-0.0556562
130.8	-0.045495	-0.0499217	-0.052595	-0.058123	1.22068	1.09099	-0.0645423	-0.0554625
131	-0.0456212	-0.0501588	-0.0525414	-0.0582915	1.22214	1.09193	-0.064505	-0.0550479
131.2	-0.0457989	-0.0499589	-0.0527545	-0.0583247	1.2234	1.0926	-0.0642303	-0.0547123
131.4	-0.0460426	-0.0501503	-0.0526044	-0.0578632	1.22475	1.09306	-0.0642992	-0.0545516
131.6	-0.0463956	-0.0504191	-0.0526037	-0.0578017	1.2257	1.09408	-0.0644737	-0.0544006
131.8	-0.046756	-0.0499235	-0.0529103	-0.05774	1.2268	1.09531	-0.0645243	-0.0545933
132	-0.0468882	-0.0504221	-0.0531026	-0.0577128	1.22865	1.09662	-0.0644572	-0.054608
132.2	-0.0468822	-0.050278	-0.0531073	-0.0575511	1.22982	1.098	-0.0643882	-0.0551309
132.4	-0.0470331	-0.0506029	-0.0531223	-0.0573815	1.23076	1.09944	-0.06401	-0.0552473
132.6	-0.0472098	-0.0505903	-0.0531168	-0.0571265	1.23178	1.10061	-0.0639621	-0.0556226
132.8	-0.0474635	-0.0504333	-0.0534356	-0.0570983	1.23298	1.10184	-0.0642434	-0.0562338
133	-0.048066	-0.0505294	-0.0539014	-0.0567359	1.23384	1.10346	-0.064467	-0.0565187
133.2	-0.0484667	-0.0506836	-0.0539497	-0.0565065	1.23535	1.10473	-0.0641205	-0.0567063
133.4	-0.0488739	-0.0509157	-0.0540435	-0.0562776	1.23599	1.10577	-0.0640894	-0.0568267
133.6	-0.0491935	-0.0513864	-0.0540088	-0.0565058	1.23708	1.10653	-0.0633882	-0.0576181
133.8	-0.0494783	-0.0517769	-0.0540556	-0.0564654	1.23787	1.10745	-0.0630572	-0.0574409
134	-0.05009	-0.0518417	-0.0540805	-0.05626	1.23899	1.10858	-0.06339	-0.057191
134.2	-0.0500519	-0.0520841	-0.0543248	-0.0566525	1.23907	1.10945	-0.0635813	-0.0571371
134.4	-0.0498492	-0.0524722	-0.0542399	-0.0567709	1.23982	1.11063	-0.0632796	-0.0565636
134.6	-0.0493769	-0.0526443	-0.0537757	-0.0577408	1.24022	1.11161	-0.0638306	-0.0567976
134.8	-0.0493276	-0.0527152	-0.0536139	-0.0578405	1.2412	1.11277	-0.0637407	-0.0572277
135	-0.0492425	-0.0531652	-0.053398	-0.0581347	1.24255	1.1136	-0.0636482	-0.0571203
135.2	-0.0490403	-0.0528834	-0.0533598	-0.0583175	1.2438	1.11393	-0.0642226	-0.0568834
135.4	-0.0491395	-0.053081	-0.0532438	-0.0584378	1.24476	1.11452	-0.0642503	-0.0571139
135.6	-0.0486346	-0.0528284	-0.0532932	-0.0587338	1.246	1.11547	-0.0644887	-0.0575606
135.8	-0.0487635	-0.052746	-0.0536072	-0.0587288	1.24736	1.11618	-0.0645769	-0.0575904
136	-0.0489599	-0.0529463	-0.0539856	-0.0588604	1.24894	1.11646	-0.0641278	-0.057338
136.2	-0.048688	-0.0525374	-0.0542897	-0.0588023	1.25034	1.11737	-0.0638958	-0.0574652
136.4	-0.0488501	-0.0523554	-0.0542694	-0.0589442	1.25165	1.11865	-0.0636644	-0.0576731
136.6	-0.0489178	-0.0522783	-0.0545764	-0.0587738	1.25319	1.12002	-0.0640875	-0.057856
136.8	-0.0489486	-0.0526689	-0.0547897	-0.0585515	1.25491	1.12116	-0.0640806	-0.0577973
137	-0.049301	-0.0526448	-0.0545685	-0.0581473	1.25577	1.12223	-0.0636943	-0.057643
137.2	-0.0494924	-0.0526222	-0.0541048	-0.0577451	1.2568	1.12306	-0.0635383	-0.0577001
137.4	-0.0493739	-0.0528688	-0.05404	-0.0576423	1.25763	1.12366	-0.0637975	-0.0572867
137.6	-0.0493999	-0.0533728	-0.0538073	-0.0576928	1.2591	1.12443	-0.0636359	-0.0574142
137.8	-0.0493113	-0.0537382	-0.0537592	-0.0576827	1.26001	1.12553	-0.0639012	-0.0569848
138	-0.0493059	-0.0536667	-0.0535269	-0.0578836	1.26087	1.12604	-0.064171	-0.0566458
138.2	-0.0488059	-0.0537202	-0.0534795	-0.0581137	1.26117	1.12683	-0.0641975	-0.0566533
138.4	-0.0483119	-0.0540725	-0.053258	-0.0583229	1.26226	1.12777	-0.0639824	-0.0566225
138.6	-0.0479703	-0.0543893	-0.0528216	-0.0581665	1.26255	1.12895	-0.0641591	-0.0568962
138.8	-0.0477793	-0.0545631	-0.0528168	-0.0578951	1.26368	1.12962	-0.0639007	-0.0564225
139	-0.0474204	-0.0550728	-0.0529959	-0.0582969	1.26461	1.13035	-0.0642653	-0.0561322
139.2	-0.0474367	-0.0547262	-0.0532668	-0.0579117	1.26588	1.13128	-0.0645569	-0.0562124
139.4	-0.0475721	-0.0549787	-0.053314	-0.0576739	1.26671	1.13229	-0.0643918	-0.0566061
139.6	-0.0475777	-0.0547784	-0.0534703	-0.0577652	1.26816	1.13356	-0.0642005	-0.0564295
139.8	-0.0480387	-0.0549165	-0.05374	-0.057908	1.26933	1.13503	-0.063971	-0.0567484
140	-0.0475856	-0.0548818	-0.0538471	-0.0585625	1.27101	1.13634	-0.0640151	-0.0564788
140.2	-0.0472581	-0.0552118	-0.0539263	-0.0584276	1.27231	1.13796	-0.0642357	-0.0565445
140.4	-0.0472816	-0.0551282	-0.0536895	-0.0586625	1.27314	1.13904	-0.0643231	-0.0565668
140.6	-0.0477109	-0.0552867	-0.0540292	-0.0582219	1.27481	1.14019	-0.0645543	-0.0565202
140.8	-0.0475219	-0.055261	-0.0534863	-0.0580224	1.27625	1.14103	-0.0643061	-0.0560018
141	-0.0476676	-0.0543712	-0.053268	-0.0578076	1.27713	1.14181	-0.0646209	-0.056169
141.2	-0.0483299	-0.0540824	-0.0533777	-0.0582592	1.27813	1.14305	-0.0647765	-0.055753
141.4	-0.048327	-0.0540615	-0.053493	-0.0588832	1.27963	1.14391	-0.0647952	-0.0554905
141.6	-0.0486188	-0.0542694	-0.0537207	-0.0594072	1.2811	1.14494	-0.06509	-0.0554606
141.8	-0.0487391	-0.0538753	-0.0534102	-0.0599592	1.28231	1.1455	-0.065127	-0.0553092
142	-0.0486907	-0.0531525	-0.0531488	-0.0603528	1.28294	1.14592	-0.064892	-0.0553069
142.2	-0.0486161	-0.0527996	-0.0530222	-0.0604975	1.28363	1.14706	-0.0650103	-0.0556134
142.4	-0.0491978	-0.0530422	-0.0532096	-0.0604087	1.2849	1.14769	-0.0647534	-0.0556244
142.6	-0.0495371	-0.0529887	-0.0533779	-0.0604235	1.28529	1.14855	-0.0647049	-0.0554168
142.8	-0.0498822	-0.0526438	-0.0535657	-0.0605376	1.28632	1.14899	-0.0646443	-0.0549769
143	-0.0496259	-0.0526254	-0.053947	-0.0605945	1.28727	1.15027	-0.0646343	-0.0552155
143.2	-0.050029	-0.0523846	-0.0540738	-0.0603388	1.28852	1.1515	-0.064946	-0.0552908
143.4	-0.05019	-0.0525634	-0.0540231	-0.0603965	1.28933	1.15243	-0.0652608	-0.0553825
143.6	-0.0502466	-0.0528868	-0.0541706	-0.0607646	1.29033	1.15401	-0.0654526	-0.0555878
143.8	-0.0499858	-0.0530634	-0.0542325	-0.0611792	1.29144	1.15508	-0.0658996	-0.0563138
144	-0.0491516	-0.053506	-0.0545872	-0.0612599	1.29212	1.15574	-0.0662561	-0.0559393
144.2	-0.0492305	-0.0537872	-0.0548136	-0.0607141	1.29271	1.1564	-0.0666991	-0.0558743
144.4	-0.0493389	-0.0537521	-0.0546337	-0.0605311	1.29339	1.15723	-0.0667233	-0.0563069
144.6	-0.0494057	-0.0537259	-0.0548266	-0.0601568	1.29466	1.15815	-0.0670304	-0.0563962
144.8	-0.0489678	-0.0537779	-0.0545394	-0.0601793	1.2955	1.1592	-0.0671483	-0.0563133
145	-0.048957	-0.0538416	-0.0549174	-0.0605105	1.2958	1.15996	-0.0672593	-0.0565384
145.2	-0.0489266	-0.053998	-0.0550168	-0.0605963	1.2966	1.16126	-0.0669449	-0.0565078
145.4	-0.0482579	-0.053959	-0.0549481	-0.0603732	1.29785	1.16221	-0.0667567	-0.0569806
145.6	-0.0480828	-0.0539314	-0.0547206	-0.0603043	1.29898	1.16332	-0.0668875	-0.0568309
145.8	-0.0480495	-0.0537708	-0.0543786	-0.0605709	1.30015	1.16405	-0.0665154	-0.0570541
146	-0.0476878	-0.0534469	-0.0542987	-0.0605143	1.30089	1.16505	-0.066047	-0.0574036
146.2	-0.0480045	-0.0534854	-0.0542822	-0.0602006	1.30179	1.16589	-0.0658662	-0.057941
146.4	-0.0483223	-0.0535688	-0.0545241	-0.0598377	1.30257	1.16623	-0.0657512	-0.0576728
146.6	-0.0487613	-0.0535788	-0.054669	-0.0601086	1.30319	1.16715	-0.0654886	-0.0578035
146.8	-0.0486977	-0.0533417	-0.0545403	-0.0601479	1.30392	1.168	-0.0654021	-0.0576286
147	-0.048778	-0.0531776	-0.0546921	-0.0600112	1.30515	1.16903	-0.0654879	-0.0581199
147.2	-0.0493158	-0.0534474	-0.0547737	-0.059987	1.30626	1.16978	-0.0659433	-0.0582207
147.4	-0.049591	-0.0535081	-0.0546665	-0.0600246	1.30687	1.17059	-0.0659967	-0.0587405
147.6	-0.050384	-0.0534863	-0.0544684	-0.0600759	1.30787	1.17128	-0.0661812	-0.0590004
147.8	-0.0507383	-0.0532989	-0.0546549	-0.060181	1.30921	1.17162	-0.0663354	-0.0587231
148	-0.050762	-0.0536017	-0.0552554	-0.0597152	1.30986	1.17231	-0.0663502	-0.0585838
148.2	-0.0512889	-0.053544	-0.0547719	-0.0598852	1.31064	1.17258	-0.0667424	-0.0585841
148.4	-0.0512545	-0.0534742	-0.0548561	-0.0599941	1.31189	1.17328	-0.0667188	-0.0585783
148.6	-0.0512313	-0.0535314	-0.0550509	-0.0603235	1.31284	1.17406	-0.0671035	-0.0579878
148.8	-0.0512294	-0.0540282	-0.0555137	-0.0602716	1.31407	1.17487	-0.0669231	-0.0582102
149	-0.0510375	-0.0541704	-0.0561042	-0.0602687	1.3153	1.17528	-0.066781	-0.0580115
149.2	-0.0509933	-0.0540033	-0.0560064	-0.0598468	1.31652	1.17661	-0.0669191	-0.0579644
149.4	-0.0505768	-0.0540117	-0.056513	-0.0600499	1.31821	1.17729	-0.0666703	-0.0577834
149.6	-0.050415	-0.0541402	-0.0562594	-0.0607532	1.31927	1.17787	-0.0667286	-0.0575347
149.8	-0.0503051	-0.0543631	-0.0561793	-0.0608441	1.32034	1.17868	-0.0668271	-0.0572319
150	-0.0496374	-0.0540671	-0.0560806	-0.0607916	1.32098	1.17958	-0.066681	-0.057524
150.2	-0.0493567	-0.054078	-0.0558352	-0.060873	1.32194	1.18041	-0.0668289	-0.0576802
150.4	-0.0491612	-0.0543093	-0.0555485	-0.0611072	1.32273	1.18144	-0.0668036	-0.0574798
150.6	-0.0491526	-0.0546299	-0.055393	-0.0613626	1.32359	1.18266	-0.0664631	-0.0580897
150.8	-0.0487735	-0.0547662	-0.0551885	-0.0610293	1.32423	1.18371	-0.0664163	-0.05804
151	-0.0487122	-0.0546895	-0.0550762	-0.0612924	1.32535	1.18449	-0.0667575	-0.0583776
151.2	-0.0488375	-0.0550041	-0.0549659	-0.0614112	1.32596	1.18518	-0.0665499	-0.0585179
151.4	-0.0490188	-0.0547513	-0.0548507	-0.0613094	1.32681	1.18603	-0.0664115	-0.0586436
151.6	-0.0492925	-0.0545872	-0.0547813	-0.0615596	1.32793	1.18672	-0.0668619	-0.0584579
151.8	-0.0490428	-0.0546403	-0.055115	-0.0615208	1.32913	1.18746	-0.0670651	-0.058318
152	-0.0493304	-0.0548112	-0.0552263	-0.0613501	1.33033	1.18813	-0.0670327	-0.0586475
152.2	-0.0495971	-0.0547791	-0.0550749	-0.0618293	1.33153	1.18866	-0.0674866	-0.0585656
152.4	-0.0498857	-0.054673	-0.0558571	-0.0618783	1.33298	1.18971	-0.0675557	-0.0585451
152.6	-0.050686	-0.0547859	-0.0563524	-0.0616658	1.33403	1.19015	-0.0676547	-0.0583982
152.8	-0.0510218	-0.054889	-0.0568903	-0.0613534	1.33524	1.19074	-0.0678466	-0.0587181
153	-0.0515712	-0.0549307	-0.057556	-0.0611388	1.33651	1.19149	-0.068195	-0.0585543
153.2	-0.0519783	-0.0550636	-0.057796	-0.0613373	1.33742	1.19218	-0.0682052	-0.0585721
153.4	-0.0517922	-0.0548983	-0.0579945	-0.0615911	1.33857	1.19227	-0.0680397	-0.0586639
153.6	-0.0520188	-0.0549585	-0.0571987	-0.0613387	1.33879	1.1927	-0.0685185	-0.0589219
153.8	-0.0520245	-0.055118	-0.0565239	-0.0610103	1.3398	1.19343	-0.068772	-0.0588313
154	-0.0516015	-0.0550006	-0.0563158	-0.0614166	1.3408	1.19412	-0.0688468	-0.0593331
154.2	-0.0510658	-0.0551734	-0.0556332	-0.0613093	1.3415	1.19501	-0.0689258	-0.0594003
154.4	-0.0511087	-0.0556552	-0.0554839	-0.0614364	1.34218	1.19578	-0.068722	-0.0595958
154.6	-0.050653	-0.0561177	-0.0555834	-0.0614316	1.34245	1.19662	-0.0689025	-0.0599526
154.8	-0.0501873	-0.0560247	-0.055599	-0.0614845	1.34333	1.1974	-0.0692464	-0.0594624
155	-0.0500697	-0.0558618	-0.0557001	-0.0621715	1.34426	1.19796	-0.0693409	-0.0595571
155.2	-0.0499761	-0.0558609	-0.0556839	-0.0621551	1.3452	1.19886	-0.0689045	-0.05986
155.4	-0.0498279	-0.0559188	-0.0557911	-0.06194	1.34629	1.19997	-0.0692578	-0.0595897
155.6	-0.0497991	-0.0562892	-0.0555714	-0.0620737	1.3473	1.20093	-0.0695918	-0.0598903
155.8	-0.0497714	-0.056784	-0.0556139	-0.0621506	1.34858	1.2019	-0.0693321	-0.0599395
156	-0.0502853	-0.0572282	-0.055563	-0.0622158	1.34976	1.20285	-0.0688604	-0.060173
156.2	-0.0506186	-0.0573582	-0.0557038	-0.0623241	1.35103	1.20344	-0.0685031	-0.0602739
156.4	-0.0508866	-0.05728	-0.0559288	-0.0622958	1.3516	1.20403	-0.0681081	-0.0603738
156.6	-0.0511277	-0.0571356	-0.05592	-0.061879	1.35222	1.20476	-0.0678609	-0.0598039
156.8	-0.0512298	-0.0568384	-0.0557226	-0.0622245	1.35353	1.20546	-0.0677532	-0.0599613
157	-0.0518722	-0.0568157	-0.0557584	-0.0618414	1.35457	1.20583	-0.0676009	-0.0601771
157.2	-0.0518137	-0.0566832	-0.0553536	-0.0619811	1.35579	1.20592	-0.0674189	-0.0601587
157.4	-0.0518222	-0.0567462	-0.0550159	-0.0616177	1.35656	1.20628	-0.0670082	-0.0604629
157.6	-0.05203	-0.0568006	-0.054436	-0.0615549	1.35728	1.20687	-0.0668406	-0.0606373
157.8	-0.0516367	-0.0562619	-0.0548187	-0.0619958	1.35872	1.20809	-0.0667849	-0.0604789
158	-0.0508983	-0.055807	-0.055183	-0.0622772	1.35975	1.2093	-0.0674193	-0.0605305
158.2	-0.0506021	-0.0555802	-0.05528	-0.0623216	1.36021	1.21007	-0.0673597	-0.0605993
158.4	-0.0507077	-0.055579	-0.0555859	-0.0625253	1.36125	1.21136	-0.0672343	-0.060692
158.6	-0.0508108	-0.055318	-0.0560378	-0.0622335	1.36193	1.21262	-0.0673584	-0.0608461
158.8	-0.0509929	-0.0550793	-0.0562018	-0.0622073	1.36281	1.21388	-0.0672715	-0.0603003
159	-0.0511948	-0.0550574	-0.0565485	-0.0623489	1.36359	1.21521	-0.0671917	-0.0604659
159.2	-0.0505967	-0.0551898	-0.0570033	-0.0622714	1.36432	1.21646	-0.0672442	-0.060382
159.4	-0.0505848	-0.0557506	-0.0573959	-0.0620445	1.36505	1.21762	-0.0675899	-0.0597325
159.6	-0.0504279	-0.0558708	-0.0573473	-0.0623738	1.36571	1.21843	-0.0676734	-0.059889
159.8	-0.0506956	-0.0560393	-0.057608	-0.0624328	1.36645	1.21952	-0.0675129	-0.0597932
160	-0.0508528	-0.0560832	-0.0576655	-0.0622251	1.36719	1.22017	-0.0674866	-0.0597248
160.2	-0.0509595	-0.0557071	-0.0577658	-0.0621308	1.36834	1.22023	-0.0675517	-0.0599113
160.4	-0.0509701	-0.0557331	-0.0582255	-0.0623331	1.36884	1.22096	-0.0679	-0.059487
160.6	-0.0511118	-0.0557208	-0.0580221	-0.0623207	1.36995	1.22143	-0.0679524	-0.0591413
160.8	-0.0514024	-0.0556692	-0.0580165	-0.0624001	1.37136	1.22164	-0.068048	-0.0593408
161	-0.0511019	-0.0560196	-0.0579981	-0.0621853	1.3721	1.22203	-0.0684456	-0.0595879
161.2	-0.0508673	-0.0564759	-0.0579354	-0.0625028	1.37336	1.22267	-0.0684468	-0.0593741
161.4	-0.0507041	-0.0565722	-0.0581542	-0.0622783	1.37427	1.22326	-0.0682019	-0.0593121
161.6	-0.0505086	-0.0565935	-0.0578395	-0.0627227	1.37531	1.22444	-0.0689091	-0.0590414
161.8	-0.0501519	-0.056308	-0.0579138	-0.0626596	1.37668	1.22569	-0.0695162	-0.0590871
162	-0.0500158	-0.0564989	-0.0572048	-0.0623622	1.37748	1.22619	-0.069881	-0.0594004
162.2	-0.0502046	-0.056758	-0.0567767	-0.0625286	1.37842	1.2266	-0.0692686	-0.0600046
162.4	-0.0500455	-0.0569024	-0.0562362	-0.0622483	1.37983	1.22765	-0.0690288	-0.060387
162.6	-0.0501454	-0.0570172	-0.0561495	-0.0619747	1.38044	1.22875	-0.069344	-0.0602447
162.8	-0.0497783	-0.0573527	-0.0562172	-0.0619593	1.38152	1.2299	-0.0695353	-0.060133
163	-0.0496793	-0.0575535	-0.0563529	-0.0619203	1.38229	1.23097	-0.0695932	-0.0600288
163.2	-0.0495623	-0.0575341	-0.0563975	-0.0619107	1.38285	1.23172	-0.0696218	-0.0598137
163.4	-0.0500684	-0.0574058	-0.0565823	-0.0621787	1.38388	1.23244	-0.069893	-0.0595717
163.6	-0.0506216	-0.0570162	-0.0564164	-0.0618555	1.38492	1.23318	-0.0700662	-0.0596819
163.8	-0.0510902	-0.0565772	-0.0568637	-0.0613929	1.3859	1.23421	-0.0703367	-0.0598942
164	-0.050963	-0.0561885	-0.0568976	-0.0612978	1.3871	1.23474	-0.0704211	-0.0601482
164.2	-0.0513348	-0.0555571	-0.0571079	-0.0618864	1.38823	1.23546	-0.0704646	-0.0604466
164.4	-0.0514833	-0.0555804	-0.0578057	-0.0621773	1.38894	1.23686	-0.0704932	-0.0599743
164.6	-0.0514747	-0.055262	-0.0576735	-0.0620957	1.38941	1.23753	-0.0696697	-0.0601932
164.8	-0.0509928	-0.0552441	-0.058175	-0.061914	1.38995	1.23841	-0.0693512	-0.0601254
165	-0.0507856	-0.0551546	-0.0580027	-0.0621537	1.39028	1.23898	-0.0690683	-0.059844
165.2	-0.0510338	-0.0554682	-0.0581617	-0.0621175	1.39077	1.23981	-0.0687534	-0.059277
165.4	-0.0509906	-0.0558225	-0.0580967	-0.0620475	1.39117	1.24011	-0.0683298	-0.0593675
165.6	-0.0511465	-0.0562688	-0.0579497	-0.0624049	1.39132	1.24112	-0.0681549	-0.0593787
165.8	-0.0508302	-0.0561669	-0.0577928	-0.0622569	1.39228	1.24172	-0.0679747	-0.0595633
166	-0.0507529	-0.0564401	-0.0579425	-0.0625064	1.39276	1.24219	-0.0675248	-0.0595126
166.2	-0.0508311	-0.0569051	-0.058023	-0.0632276	1.39357	1.24287	-0.0672711	-0.0598239
166.4	-0.0508663	-0.0568186	-0.0578446	-0.0631296	1.39417	1.24383	-0.0677086	-0.0599051
166.6	-0.0507819	-0.0573499	-0.0577649	-0.06314	1.39472	1.24494	-0.0681019	-0.0599145
166.8	-0.0511598	-0.0577838	-0.0578095	-0.0633674	1.39582	1.24605	-0.0681755	-0.0605297
167	-0.0519651	-0.0580963	-0.0579148	-0.0639241	1.39643	1.24682	-0.068352	-0.0604548
167.2	-0.0520769	-0.05805	-0.0578028	-0.0638079	1.39726	1.24721	-0.0688835	-0.0607192
167.4	-0.0523986	-0.0583895	-0.0580453	-0.0643443	1.39854	1.24843	-0.0696236	-0.0610727
167.6	-0.0529286	-0.0584898	-0.0578495	-0.0638897	1.39998	1.24936	-0.0699989	-0.0612678
167.8	-0.052928	-0.0577933	-0.0576857	-0.0640958	1.4008	1.25059	-0.0706759	-0.0617549
168	-0.052715	-0.0577163	-0.0571986	-0.0644435	1.40189	1.25159	-0.0707256	-0.0617697
168.2	-0.0532779	-0.0574753	-0.0574459	-0.0651274	1.40307	1.25222	-0.0713427	-0.0616768
168.4	-0.0531334	-0.0572662	-0.0572221	-0.0645796	1.40401	1.25311	-0.0712001	-0.0617584
168.6	-0.0529664	-0.0575718	-0.0570505	-0.0649106	1.40509	1.25364	-0.0709762	-0.0619122
168.8	-0.0525366	-0.057768	-0.0573309	-0.0648159	1.40633	1.25382	-0.0709752	-0.0617651
169	-0.0525694	-0.0575991	-0.0570657	-0.0647364	1.40736	1.25416	-0.0711123	-0.0615052
169.2	-0.0526577	-0.0579825	-0.0573744	-0.0644379	1.40792	1.25495	-0.0709536	-0.0616846
169.4	-0.0524284	-0.0577827	-0.0574334	-0.0642333	1.40883	1.25561	-0.0708633	-0.0619549
169.6	-0.0521481	-0.0570307	-0.0579478	-0.0639082	1.40972	1.25678	-0.070906	-0.0613406
169.8	-0.0519459	-0.0566875	-0.0584193	-0.0640239	1.41102	1.2577	-0.0707082	-0.0608477
170	-0.0520232	-0.0568239	-0.0587545	-0.0641012	1.41118	1.25856	-0.0701561	-0.0605818
170.2	-0.0525764	-0.0565129	-0.0586808	-0.0643508	1.41229	1.25902	-0.070123	-0.0602471
170.4	-0.052575	-0.0563506	-0.0584729	-0.0639598	1.41283	1.25973	-0.0699839	-0.0599116
170.6	-0.0525569	-0.0561942	-0.058499	-0.0640424	1.41374	1.2603	-0.0696489	-0.0597689
170.8	-0.0529193	-0.0562109	-0.0590619	-0.0641421	1.41455	1.26113	-0.0694189	-0.0596619
171	-0.0532009	-0.0567213	-0.0594132	-0.0642586	1.4152	1.26203	-0.0693973	-0.0593361
171.2	-0.0532114	-0.0568432	-0.0595446	-0.0639452	1.41597	1.26245	-0.0692024	-0.0592201
171.4	-0.0534743	-0.0570945	-0.0595232	-0.063959	1.4169	1.2639	-0.0693072	-0.0591176
171.6	-0.0534278	-0.0571903	-0.059202	-0.0637928	1.41769	1.2647	-0.0691107	-0.0593342
171.8	-0.0538889	-0.0569811	-0.0587496	-0.0641793	1.41842	1.26537	-0.0692078	-0.0593926
172	-0.0542083	-0.057266	-0.0586919	-0.0646279	1.41949	1.26606	-0.069523	-0.0597002
172.2	-0.0545338	-0.0577437	-0.0589644	-0.0648946	1.42097	1.2659	-0.0698758	-0.0603552
172.4	-0.0541224	-0.058022	-0.0586829	-0.0645436	1.42219	1.26639	-0.0698503	-0.060983
172.6	-0.0536365	-0.0581443	-0.0591124	-0.064954	1.42352	1.26682	-0.0702627	-0.0614449
172.8	-0.0529195	-0.0579972	-0.0590808	-0.0641168	1.42432	1.26671	-0.0702747	-0.061908
173	-0.0528268	-0.0578979	-0.0586314	-0.0638287	1.42532	1.26735	-0.0707797	-0.0624629
173.2	-0.0529123	-0.0582149	-0.0584776	-0.0637534	1.4254	1.26822	-0.0707901	-0.0626524
173.4	-0.0524662	-0.0577049	-0.0583639	-0.0634881	1.42632	1.26887	-0.070962	-0.0626687
173.6	-0.052214	-0.0576709	-0.0582393	-0.063601	1.42702	1.26962	-0.0706203	-0.0622827
173.8	-0.0521323	-0.0584611	-0.0579874	-0.064006	1.42749	1.2703	-0.0706153	-0.062173
174	-0.0520336	-0.0586518	-0.057747	-0.0636668	1.4283	1.27106	-0.0705032	-0.0622658
174.2	-0.0525138	-0.0585537	-0.0575389	-0.0640446	1.42965	1.27147	-0.0706511	-0.0619963
174.4	-0.0526641	-0.0591087	-0.0578276	-0.0641879	1.42975	1.27221	-0.0705932	-0.0618943
174.6	-0.0525427	-0.0591844	-0.0583056	-0.0641383	1.43047	1.27295	-0.0703665	-0.0619772
174.8	-0.0527723	-0.0595558	-0.0590547	-0.0641273	1.43139	1.27413	-0.0701351	-0.0615177
175	-0.0532024	-0.0599368	-0.0589162	-0.0642385	1.43222	1.27526	-0.069909	-0.0612417
175.2	-0.0536292	-0.0599339	-0.0590647	-0.0640937	1.43335	1.27598	-0.0695046	-0.0605704
175.4	-0.0536541	-0.0602276	-0.0592029	-0.0638309	1.43394	1.27725	-0.0695835	-0.0604529
175.6	-0.0538644	-0.0601221	-0.0595562	-0.0641897	1.43449	1.27806	-0.0694237	-0.0609177
175.8	-0.054775	-0.0600782	-0.0597269	-0.0637958	1.4358	1.27845	-0.0691106	-0.0604888
176	-0.0548464	-0.0599485	-0.0601135	-0.0637217	1.43684	1.27939	-0.0695605	-0.0604797
176.2	-0.0546727	-0.0602758	-0.0602992	-0.0633742	1.43795	1.27957	-0.0693215	-0.060542
176.4	-0.0544775	-0.0601765	-0.0602946	-0.0627837	1.4392	1.28057	-0.0695667	-0.0607022
176.6	-0.0543612	-0.0599922	-0.0600232	-0.0626295	1.43973	1.28113	-0.0695932	-0.0605778
176.8	-0.0543888	-0.0602994	-0.0597548	-0.0624953	1.44019	1.28142	-0.069529	-0.0604018
177	-0.0546069	-0.0606397	-0.0591213	-0.0627191	1.4409	1.28228	-0.0699791	-0.0599873
177.2	-0.0544828	-0.0607669	-0.0590235	-0.0628082	1.44083	1.28308	-0.0703987	-0.0597905
177.4	-0.0542015	-0.0605368	-0.0592485	-0.0627906	1.44185	1.28378	-0.0706473	-0.0598219
177.6	-0.0536973	-0.060941	-0.0590592	-0.0632362	1.44248	1.28423	-0.0707862	-0.0601629
177.8	-0.0536868	-0.0610664	-0.059213	-0.0633075	1.44309	1.28516	-0.0712233	-0.0604513
178	-0.0537311	-0.0607196	-0.0593609	-0.0635889	1.44396	1.28593	-0.0707437	-0.0609152
178.2	-0.0538729	-0.0610265	-0.059124	-0.064508	1.44459	1.28628	-0.0710111	-0.0611769
178.4	-0.0538688	-0.060932	-0.0592157	-0.0649325	1.4446	1.28705	-0.071115	-0.0615301
178.6	-0.0533921	-0.0605211	-0.0593715	-0.0646348	1.44515	1.28788	-0.0711617	-0.0619917
178.8	-0.0536039	-0.0604234	-0.0593009	-0.0653573	1.44559	1.28848	-0.0715162	-0.0622755
179	-0.053309	-0.0599551	-0.0590658	-0.0658173	1.44595	1.28914	-0.0716932	-0.0625064
179.2	-0.0534174	-0.0595437	-0.0592635	-0.0657783	1.4464	1.28981	-0.0716351	-0.062504
179.4	-0.0534582	-0.0592324	-0.0593374	-0.0663163	1.4468	1.29038	-0.0716473	-0.0632573
179.6	-0.0538883	-0.0587212	-0.0593287	-0.066323	1.44758	1.29145	-0.0717594	-0.063314
179.8	-0.0539064	-0.0586456	-0.0592145	-0.0661979	1.44871	1.29204	-0.0717063	-0.0631657
180	-0.0538363	-0.0584675	-0.0592542	-0.0661872	1.44971	1.29306	-0.0719025	-0.0631877
180.2	-0.0541526	-0.0585896	-0.0589039	-0.0659458	1.45038	1.29345	-0.071529	-0.063172
180.4	-0.0543598	-0.0590051	-0.0588889	-0.065713	1.45145	1.29401	-0.0718279	-0.0629177
180.6	-0.0546427	-0.0588473	-0.0590089	-0.0655974	1.45202	1.29459	-0.0714588	-0.0626022
180.8	-0.0548532	-0.0590525	-0.0592203	-0.0654736	1.45269	1.2953	-0.0714054	-0.0625677
181	-0.0547718	-0.0590245	-0.0595765	-0.06516	1.45324	1.29602	-0.0714352	-0.0622051
181.2	-0.0549432	-0.0587359	-0.0601353	-0.0651614	1.45407	1.29614	-0.0715773	-0.0621714
181.4	-0.0549865	-0.0590156	-0.0606029	-0.0651854	1.45486	1.29667	-0.0710236	-0.0616572
181.6	-0.0549809	-0.0588532	-0.0607817	-0.0650638	1.45565	1.2971	-0.0706754	-0.0616454
181.8	-0.0551752	-0.0587316	-0.0611773	-0.064657	1.45646	1.29799	-0.0704938	-0.0613718
182	-0.0552835	-0.0591002	-0.0610922	-0.0648514	1.45725	1.29842	-0.0700627	-0.061176
182.2	-0.0551617	-0.0592106	-0.0608489	-0.064489	1.45845	1.29897	-0.0707635	-0.0615074
182.4	-0.0550032	-0.0589714	-0.0611066	-0.0643069	1.45881	1.29942	-0.0713168	-0.0618028
182.6	-0.0546348	-0.0590978	-0.0613984	-0.0642688	1.45941	1.30007	-0.0714839	-0.0619631
182.8	-0.0546531	-0.0590973	-0.0614403	-0.0647156	1.46012	1.30071	-0.0719947	-0.0624258
183	-0.0547639	-0.0587832	-0.0613213	-0.064857	1.46113	1.30154	-0.0724097	-0.0626891
183.2	-0.0552214	-0.0588949	-0.0615246	-0.065176	1.4621	1.30234	-0.0722684	-0.0627481
183.4	-0.0552579	-0.0590141	-0.0614898	-0.0660265	1.46305	1.30297	-0.072393	-0.0630275
183.6	-0.055284	-0.0592229	-0.0614444	-0.0657258	1.46385	1.30365	-0.0728167	-0.063037
183.8	-0.0548842	-0.0591931	-0.0614471	-0.0661912	1.46469	1.30424	-0.0727697	-0.0634136
184	-0.0548587	-0.0588733	-0.0612032	-0.0659876	1.46547	1.30518	-0.0725068	-0.0631566
184.2	-0.0554094	-0.0589665	-0.060955	-0.0662975	1.46573	1.30583	-0.0726212	-0.062871
184.4	-0.0551509	-0.0594515	-0.0611466	-0.0660291	1.4663	1.30673	-0.0727917	-0.0628009
184.6	-0.0552832	-0.0591639	-0.061093	-0.0660431	1.46695	1.30755	-0.07253	-0.0630444
184.8	-0.0552224	-0.05914	-0.0605429	-0.0663223	1.46758	1.30788	-0.0725441	-0.0630434
185	-0.0554473	-0.0590634	-0.0608899	-0.0662439	1.46792	1.30829	-0.0723325	-0.0624468
185.2	-0.055796	-0.0594286	-0.0606566	-0.0660895	1.46897	1.30822	-0.0722626	-0.0623245
185.4	-0.0556512	-0.0597359	-0.0608261	-0.0660507	1.46945	1.30923	-0.0721299	-0.061707
185.6	-0.055424	-0.0596228	-0.0613533	-0.0654832	1.47043	1.30968	-0.0720064	-0.0616438
185.8	-0.0552774	-0.0598614	-0.0613027	-0.0651971	1.47123	1.31013	-0.0718944	-0.0614246
186	-0.0548937	-0.0600764	-0.0612466	-0.0648098	1.47234	1.31087	-0.072131	-0.061291
186.2	-0.0549151	-0.0598642	-0.0610584	-0.0644909	1.4729	1.31161	-0.0725553	-0.0614756
186.4	-0.0549363	-0.0600135	-0.0608863	-0.064557	1.47356	1.31158	-0.0729422	-0.0615829
186.6	-0.0548546	-0.0599556	-0.0603395	-0.0643591	1.47437	1.31276	-0.0728785	-0.0614784
186.8	-0.0549539	-0.0602175	-0.0601278	-0.0643096	1.4755	1.31364	-0.0730718	-0.0618312
187	-0.0550598	-0.0602721	-0.0598025	-0.0641188	1.47615	1.31404	-0.072987	-0.0619133
187.2	-0.0551324	-0.0605532	-0.0596222	-0.0645004	1.47687	1.31442	-0.0726384	-0.0618121
187.4	-0.0551968	-0.060514	-0.0593258	-0.0648192	1.47769	1.31476	-0.0727953	-0.062309
187.6	-0.055116	-0.0607347	-0.0588719	-0.0648781	1.47838	1.31535	-0.0726534	-0.0626024
187.8	-0.0549885	-0.0611372	-0.0587866	-0.0653779	1.47867	1.31619	-0.0722394	-0.0629334
188	-0.055095	-0.0610287	-0.0585303	-0.0649912	1.47919	1.31706	-0.0719837	-0.0629153
188.2	-0.0553523	-0.0614192	-0.0585646	-0.0650749	1.47971	1.31795	-0.0721092	-0.0629517
188.4	-0.0551811	-0.0613543	-0.0582854	-0.0649642	1.48049	1.31827	-0.071748	-0.0630323
188.6	-0.0556876	-0.0611985	-0.0581038	-0.0653464	1.48107	1.31859	-0.0715616	-0.0632068
188.8	-0.0556202	-0.060945	-0.0582682	-0.065201	1.48184	1.31888	-0.0712188	-0.0634748
189	-0.0560677	-0.0611863	-0.0590367	-0.064995	1.48224	1.31946	-0.0712391	-0.0632888
189.2	-0.0563341	-0.0613566	-0.0591431	-0.064732	1.48293	1.3202	-0.0714802	-0.0636907
189.4	-0.0560168	-0.0611701	-0.0599329	-0.0650558	1.48328	1.32098	-0.0716823	-0.0631875
189.6	-0.0560842	-0.0608669	-0.0602794	-0.0644668	1.4843	1.3213	-0.0717267	-0.063385
189.8	-0.0561172	-0.0607092	-0.0602237	-0.0644589	1.48504	1.32252	-0.0721063	-0.0633124
190	-0.055756	-0.0607327	-0.0604966	-0.0643652	1.48566	1.3235	-0.072562	-0.062959
190.2	-0.0561417	-0.0601346	-0.0604357	-0.0645784	1.48608	1.32413	-0.0728752	-0.0623633
190.4	-0.0559864	-0.0600113	-0.060388	-0.0642861	1.48708	1.32465	-0.0728377	-0.0621426
190.6	-0.0554968	-0.0596106	-0.0604252	-0.0643909	1.48753	1.32596	-0.0726828	-0.0618902
190.8	-0.0552287	-0.0596249	-0.0607145	-0.0645224	1.48832	1.32663	-0.0725445	-0.0619347
191	-0.0551117	-0.0590373	-0.0608064	-0.0647462	1.48897	1.3273	-0.0725147	-0.0619216
191.2	-0.0552399	-0.0592868	-0.0608035	-0.0654594	1.49006	1.3281	-0.0727504	-0.0625023
191.4	-0.055302	-0.0590689	-0.0611511	-0.0659914	1.49082	1.32871	-0.0725918	-0.0629262
191.6	-0.0550694	-0.0593505	-0.061381	-0.066321	1.49129	1.3292	-0.072121	-0.063435
191.8	-0.0553487	-0.0599125	-0.0617289	-0.0663711	1.49196	1.3295	-0.0717565	-0.0636617
192	-0.0556352	-0.0592859	-0.06144	-0.0660999	1.49337	1.32993	-0.0718204	-0.0638051
192.2	-0.0562961	-0.0599824	-0.0612153	-0.0663621	1.49421	1.33036	-0.0718539	-0.0638002
192.4	-0.0566936	-0.0600439	-0.0610728	-0.0666778	1.49516	1.33015	-0.0717166	-0.063554
192.6	-0.0570131	-0.0598346	-0.0610214	-0.0664177	1.49571	1.33023	-0.0719696	-0.0639095
192.8	-0.0572129	-0.0601785	-0.0613664	-0.0661874	1.49692	1.33038	-0.0718866	-0.0642936
193	-0.057365	-0.0601237	-0.0613121	-0.0661594	1.49791	1.33085	-0.0722487	-0.0639851
193.2	-0.0576869	-0.0603062	-0.0613144	-0.0659555	1.49889	1.33172	-0.0722954	-0.0641466
193.4	-0.0572652	-0.0605507	-0.0615787	-0.0659314	1.49993	1.33187	-0.0725013	-0.0639204
193.6	-0.05737	-0.0606883	-0.061305	-0.0654916	1.50132	1.3325	-0.0726907	-0.0641056
193.8	-0.0572626	-0.0607568	-0.061294	-0.06528	1.50197	1.33361	-0.0728875	-0.0640352
194	-0.0569022	-0.060523	-0.0611512	-0.0654876	1.50301	1.33409	-0.0729128	-0.063651
194.2	-0.0569363	-0.0601781	-0.0609957	-0.0656795	1.50342	1.33497	-0.0731632	-0.0633907
194.4	-0.0562723	-0.0606592	-0.0611417	-0.0657472	1.50381	1.33556	-0.073026	-0.0636979
194.6	-0.0558532	-0.0608253	-0.0612929	-0.0659178	1.50464	1.33607	-0.0735033	-0.0638753
194.8	-0.0556645	-0.0610848	-0.0613049	-0.0662835	1.50572	1.33649	-0.0734521	-0.0640467
195	-0.0556343	-0.0613458	-0.0612738	-0.0665408	1.50677	1.33723	-0.0736255	-0.0642651
195.2	-0.0558039	-0.0615906	-0.0613347	-0.066367	1.50726	1.33806	-0.0736326	-0.0650488
195.4	-0.0557058	-0.0615247	-0.061599	-0.0662332	1.50792	1.33852	-0.0732249	-0.0647402
195.6	-0.05567	-0.0613755	-0.0619244	-0.066163	1.50884	1.33884	-0.0732448	-0.0647016
195.8	-0.0559414	-0.0616259	-0.0617817	-0.0661653	1.50979	1.33941	-0.0732	-0.0643927
196	-0.0562737	-0.0613075	-0.0614304	-0.0658139	1.51063	1.34021	-0.0733875	-0.0643646
196.2	-0.0567859	-0.0617351	-0.0615134	-0.0661137	1.51091	1.3408	-0.0731979	-0.0644516
196.4	-0.0566316	-0.061345	-0.0618138	-0.066202	1.51175	1.34124	-0.0734759	-0.0640437
196.6	-0.0569055	-0.0612354	-0.0618811	-0.066025	1.51204	1.34191	-0.0737413	-0.0642228
196.8	-0.0571579	-0.0617112	-0.0625003	-0.0657303	1.51318	1.34267	-0.0734223	-0.0641332
197	-0.0571071	-0.0610744	-0.0623693	-0.0655289	1.51417	1.34341	-0.0732911	-0.0636782
197.2	-0.0572519	-0.0612894	-0.0629153	-0.0653284	1.51514	1.34439	-0.073389	-0.0633428
197.4	-0.0564945	-0.0614599	-0.0629703	-0.0654827	1.51567	1.34502	-0.0736891	-0.0632761
197.6	-0.0567196	-0.0613614	-0.0630615	-0.0651199	1.51626	1.34598	-0.0740525	-0.062774
197.8	-0.0570085	-0.0612092	-0.0631734	-0.0652616	1.51667	1.34712	-0.0739662	-0.0631644
198	-0.0568559	-0.0617335	-0.0629747	-0.0657289	1.51714	1.34791	-0.0742909	-0.0627767
198.2	-0.0570649	-0.0626854	-0.0626924	-0.0662355	1.51741	1.34833	-0.075155	-0.0625966
198.4	-0.0568036	-0.0632235	-0.0628595	-0.0665757	1.51803	1.34867	-0.0756049	-0.0625545
198.6	-0.0571327	-0.0634884	-0.0628527	-0.0664811	1.51873	1.34888	-0.0760104	-0.0627658
198.8	-0.057247	-0.063677	-0.0625562	-0.0668488	1.5195	1.34926	-0.0761981	-0.0632052
199	-0.0571173	-0.0635506	-0.0625389	-0.0666937	1.51999	1.35002	-0.0761934	-0.063384
199.2	-0.0569966	-0.0629323	-0.0624647	-0.0667477	1.52048	1.35066	-0.0755918	-0.0635322
199.4	-0.0568398	-0.0623481	-0.0626498	-0.0667168	1.52096	1.3512	-0.0751739	-0.0633101
199.6	-0.0568278	-0.06213	-0.0628906	-0.0667846	1.52122	1.35197	-0.0749057	-0.0637887
199.8	-0.0568215	-0.0620077	-0.063067	-0.0670905	1.52134	1.35226	-0.0744159	-0.0643306
200	-0.0569606	-0.061623	-0.0629272	-0.0668664	1.52205	1.35304	-0.0741625	-0.0648619
200.2	-0.0568297	-0.0614163	-0.063041	-0.0671633	1.52247	1.35324	-0.0742837	-0.0653641
200.4	-0.0568178	-0.0606549	-0.063272	-0.0669287	1.52306	1.35384	-0.0744917	-0.0656023
200.6	-0.0571889	-0.0601474	-0.0630851	-0.0667987	1.5234	1.3544	-0.0744482	-0.0660854
200.8	-0.0572061	-0.059908	-0.0632011	-0.0665967	1.52442	1.35501	-0.0737683	-0.0660166
201	-0.0572957	-0.0595395	-0.0629627	-0.0667508	1.52515	1.35514	-0.0732115	-0.0658733
201.2	-0.057259	-0.0595612	-0.0633605	-0.0668156	1.52543	1.35591	-0.0731491	-0.0657068
201.4	-0.0569681	-0.0597695	-0.0632541	-0.0672523	1.52548	1.35687	-0.0731351	-0.066147
201.6	-0.0575779	-0.0598614	-0.0632293	-0.0671476	1.52599	1.35746	-0.0729938	-0.0657923
201.8	-0.0583135	-0.0601834	-0.0629159	-0.0676327	1.52661	1.3581	-0.0728638	-0.06616
202	-0.0585287	-0.0608438	-0.06212	-0.0679682	1.52695	1.35877	-0.0736192	-0.0652724
202.2	-0.0590118	-0.0608396	-0.0616763	-0.0682552	1.5278	1.35923	-0.0742411	-0.0651407
202.4	-0.0591274	-0.0608987	-0.0618101	-0.0684204	1.52823	1.35977	-0.0744433	-0.0651794
202.6	-0.0592514	-0.0609806	-0.0613397	-0.068235	1.52883	1.36036	-0.0749863	-0.065582
202.8	-0.0589536	-0.0610471	-0.061199	-0.0681825	1.53025	1.36126	-0.0748877	-0.0655733
203	-0.0585021	-0.0611979	-0.0611669	-0.0684678	1.53096	1.36202	-0.0745676	-0.0652655
203.2	-0.0585254	-0.0611426	-0.0612472	-0.0679919	1.53174	1.3624	-0.0745392	-0.0649837
203.4	-0.0583928	-0.0610383	-0.0615537	-0.0675234	1.53235	1.36288	-0.0746319	-0.0651445
203.6	-0.0583425	-0.0614644	-0.0618085	-0.067567	1.53313	1.36357	-0.0750112	-0.0651393
203.8	-0.0582063	-0.061009	-0.0619192	-0.0677199	1.53428	1.36388	-0.0750845	-0.0649866
204	-0.0582634	-0.060962	-0.0619612	-0.0673955	1.53525	1.36498	-0.075601	-0.0650269
204.2	-0.0580695	-0.0607269	-0.0624183	-0.0673557	1.53627	1.36557	-0.0758305	-0.0651224
204.4	-0.0579622	-0.060192	-0.0627177	-0.067419	1.53713	1.36677	-0.0757163	-0.0651575
204.6	-0.0577937	-0.060704	-0.0626004	-0.0674671	1.53774	1.36753	-0.0757474	-0.0650649
204.8	-0.0574291	-0.0613175	-0.0630566	-0.0676511	1.53829	1.36796	-0.0753754	-0.0651623
205	-0.0571917	-0.0617415	-0.0634829	-0.0677063	1.53895	1.36829	-0.0751337	-0.0652551
205.2	-0.0570041	-0.0619699	-0.0640531	-0.0676048	1.53911	1.36894	-0.0752769	-0.0649439
205.4	-0.0570375	-0.0619696	-0.064866	-0.0674236	1.53984	1.36945	-0.0749321	-0.0652696
205.6	-0.0573331	-0.0620284	-0.0650648	-0.0668111	1.54053	1.36954	-0.0746412	-0.0649012
205.8	-0.0577665	-0.0621277	-0.0651432	-0.0665023	1.54124	1.3704	-0.0747003	-0.0649785
206	-0.0576889	-0.0620367	-0.0649692	-0.0663725	1.54199	1.37111	-0.0745975	-0.0648093
206.2	-0.0577375	-0.0620259	-0.0649626	-0.0659464	1.54268	1.37126	-0.0742245	-0.0651102
206.4	-0.0578248	-0.0623904	-0.064808	-0.0660243	1.54308	1.37187	-0.0740481	-0.0656109
206.6	-0.0571065	-0.0619086	-0.0645025	-0.065819	1.54408	1.37262	-0.0742346	-0.0655551
206.8	-0.0568749	-0.0620679	-0.0644443	-0.0656524	1.54495	1.37296	-0.073775	-0.0656679
207	-0.0566876	-0.0621	-0.0643718	-0.0658849	1.5451	1.37318	-0.0739065	-0.0653427
207.2	-0.056699	-0.0617932	-0.0641885	-0.0657332	1.54541	1.37348	-0.073861	-0.0652055
207.4	-0.0566882	-0.0616846	-0.0638044	-0.0663991	1.54603	1.37412	-0.0741489	-0.0650236
207.6	-0.0572075	-0.0618833	-0.063706	-0.0671193	1.54652	1.3753	-0.0745457	-0.0648656
207.8	-0.0574897	-0.0614858	-0.0633693	-0.0674678	1.54695	1.37605	-0.0746822	-0.0645488
208	-0.0575123	-0.0619323	-0.0631579	-0.0677217	1.54726	1.37689	-0.07516	-0.0645384
208.2	-0.0573198	-0.0620898	-0.0629307	-0.067796	1.5481	1.37762	-0.0753039	-0.0645537
208.4	-0.0572266	-0.062301	-0.0630035	-0.0681974	1.54826	1.37828	-0.0755196	-0.0645539
208.6	-0.0569807	-0.0633839	-0.0627118	-0.0682475	1.54851	1.37829	-0.0759203	-0.0651131
208.8	-0.05666	-0.0641021	-0.0633939	-0.068447	1.54871	1.37869	-0.0759303	-0.065061
209	-0.0567763	-0.0646445	-0.0637303	-0.0684027	1.54941	1.37956	-0.0759074	-0.0644695
209.2	-0.0569808	-0.0652603	-0.0641555	-0.0679056	1.54981	1.3802	-0.0763654	-0.0645571
209.4	-0.0567492	-0.0651663	-0.0648089	-0.067439	1.55063	1.38093	-0.0760231	-0.0646765
209.6	-0.0567574	-0.0658434	-0.0650979	-0.0670198	1.55135	1.38164	-0.0761092	-0.0647041
209.8	-0.0569976	-0.0661287	-0.0648936	-0.0672143	1.55233	1.38241	-0.0760492	-0.0653597
210	-0.0572232	-0.0662229	-0.0648794	-0.0670864	1.55297	1.38271	-0.0756818	-0.0656548
210.2	-0.0573857	-0.0664765	-0.0648261	-0.0673741	1.55337	1.38299	-0.0752718	-0.0660986
210.4	-0.0573801	-0.0662898	-0.0652946	-0.0676819	1.5546	1.38345	-0.0751225	-0.0665902
210.6	-0.0571371	-0.0659504	-0.0656878	-0.0677647	1.55576	1.38318	-0.07494	-0.066565
210.8	-0.0572826	-0.0660347	-0.0657195	-0.0677791	1.55629	1.38363	-0.0748086	-0.0667063
211	-0.057416	-0.0657261	-0.0658639	-0.0681963	1.55653	1.38407	-0.0750287	-0.0661621
211.2	-0.0579839	-0.065436	-0.0657486	-0.0686675	1.5573	1.38453	-0.0749652	-0.0666063
211.4	-0.0584061	-0.064999	-0.0654621	-0.0689844	1.55804	1.38456	-0.0749803	-0.0666608
211.6	-0.0590222	-0.0645802	-0.0654828	-0.0693646	1.55826	1.3849	-0.0750562	-0.0663689
211.8	-0.0589759	-0.064425	-0.0653439	-0.0693823	1.55872	1.38461	-0.0750813	-0.0666332
212	-0.0591822	-0.0642044	-0.06528	-0.0693739	1.55896	1.38475	-0.0749969	-0.0668986
212.2	-0.0596682	-0.0637655	-0.065152	-0.0693709	1.55918	1.38501	-0.0751442	-0.0672551
212.4	-0.0595276	-0.063635	-0.0654791	-0.0694057	1.55993	1.38507	-0.0758464	-0.0675495
212.6	-0.0592807	-0.063869	-0.0651065	-0.0690183	1.56038	1.38546	-0.0762521	-0.0673994
212.8	-0.0591004	-0.063198	-0.0651877	-0.0689706	1.56066	1.38662	-0.0763342	-0.0670284
213	-0.0588989	-0.0633174	-0.0647838	-0.0690237	1.56141	1.38716	-0.0769086	-0.0668255
213.2	-0.0584467	-0.0635464	-0.0649207	-0.0684173	1.56182	1.38782	-0.0771371	-0.0667637
213.4	-0.0577153	-0.0634032	-0.0649522	-0.0681995	1.56252	1.38842	-0.0768524	-0.066281
213.6	-0.0579599	-0.0636136	-0.0648669	-0.0682641	1.56303	1.38905	-0.0768666	-0.0665308
213.8	-0.0578488	-0.0634359	-0.0642657	-0.0684093	1.5639	1.38949	-0.0765208	-0.0669568
214	-0.0574622	-0.0635207	-0.0644064	-0.0685249	1.56456	1.39011	-0.0760747	-0.0667042
214.2	-0.0572726	-0.0636695	-0.0642601	-0.0685156	1.56539	1.39085	-0.0760016	-0.066383
214.4	-0.057343	-0.0639899	-0.064427	-0.0682684	1.56658	1.39148	-0.075603	-0.066171
214.6	-0.0576623	-0.0643857	-0.0638954	-0.0683968	1.56706	1.39183	-0.0754967	-0.0657739
214.8	-0.0575825	-0.0644297	-0.0639752	-0.068071	1.56763	1.39279	-0.075606	-0.0650769
215	-0.0578171	-0.0648171	-0.0635634	-0.0685146	1.5681	1.39348	-0.075057	-0.0646936
215.2	-0.0583127	-0.0650216	-0.0637942	-0.0685041	1.56898	1.39405	-0.0745324	-0.0648345
215.4	-0.0583825	-0.0648819	-0.0638664	-0.0684453	1.56961	1.39416	-0.0740436	-0.0646111
215.6	-0.0585842	-0.0650927	-0.0640046	-0.0683636	1.56968	1.39438	-0.0738391	-0.0648254
215.8	-0.0586246	-0.0655123	-0.0639961	-0.0680297	1.57027	1.39478	-0.07361	-0.0651768
216	-0.0591399	-0.0654717	-0.0637723	-0.0680375	1.57057	1.39557	-0.073763	-0.0654576
216.2	-0.0594949	-0.0653648	-0.0639667	-0.0678559	1.57103	1.39609	-0.0739728	-0.0657797
216.4	-0.0592921	-0.065351	-0.0644738	-0.0676522	1.57186	1.39626	-0.0743352	-0.0660658
216.6	-0.0594338	-0.0646149	-0.0642769	-0.067748	1.57272	1.39722	-0.0739719	-0.0665059
216.8	-0.0592883	-0.0644881	-0.0644385	-0.067967	1.57352	1.39832	-0.0739382	-0.0668582
217	-0.0592882	-0.0647087	-0.0646474	-0.0683507	1.57421	1.39868	-0.0743223	-0.0667742
217.2	-0.0595464	-0.064413	-0.0647574	-0.0681789	1.57476	1.3993	-0.0741887	-0.0669281
217.4	-0.0595662	-0.0640263	-0.0646531	-0.0688098	1.57575	1.39997	-0.0744062	-0.0674708
217.6	-0.0597573	-0.0632313	-0.064369	-0.0692126	1.57665	1.40061	-0.0742289	-0.0683168
217.8	-0.0595066	-0.0629024	-0.0642883	-0.0694565	1.57742	1.40115	-0.0741842	-0.0687267
218	-0.0592985	-0.0629301	-0.0640827	-0.0692862	1.5783	1.40209	-0.0741263	-0.0686165
218.2	-0.059569	-0.0627398	-0.0638345	-0.0692818	1.57884	1.40299	-0.0743693	-0.0685401
218.4	-0.0597049	-0.062744	-0.0638316	-0.069519	1.57945	1.40329	-0.0745003	-0.0685107
218.6	-0.0597004	-0.0623831	-0.0635936	-0.0698198	1.58014	1.404	-0.0746844	-0.0683295
218.8	-0.0592072	-0.0622294	-0.063994	-0.0697733	1.58052	1.40479	-0.0747733	-0.067569
219	-0.0587418	-0.062437	-0.0637812	-0.0703406	1.5812	1.40543	-0.0748723	-0.0672326
219.2	-0.0587577	-0.0625107	-0.0642873	-0.0702492	1.58134	1.4058	-0.0752588	-0.0672877
219.4	-0.0583407	-0.0627023	-0.0643622	-0.0700213	1.58194	1.40575	-0.0756396	-0.0672104
219.6	-0.0581334	-0.0628214	-0.0643733	-0.0698316	1.5821	1.40609	-0.0757991	-0.067146
219.8	-0.0580501	-0.0635056	-0.0644331	-0.06993	1.58224	1.40617	-0.0758394	-0.0664983
220	-0.0579898	-0.0640707	-0.0647447	-0.0700072	1.58227	1.4064	-0.0759987	-0.0664879
220.2	-0.0578319	-0.0643142	-0.0652315	-0.0693664	1.58273	1.40641	-0.075998	-0.0664581
220.4	-0.0576511	-0.0646814	-0.0654525	-0.0694133	1.58341	1.40654	-0.0768096	-0.0663577
220.6	-0.0570817	-0.0648884	-0.0658405	-0.069395	1.58412	1.40754	-0.077145	-0.0663946
220.8	-0.0573556	-0.065755	-0.0661806	-0.0691248	1.5843	1.40821	-0.0772278	-0.0657021
221	-0.0580569	-0.0654803	-0.0662056	-0.06936	1.58454	1.40861	-0.0779266	-0.0656014
221.2	-0.0585039	-0.0656207	-0.0662953	-0.0692143	1.58531	1.40902	-0.077994	-0.0659384
221.4	-0.058687	-0.0653977	-0.0663683	-0.0694742	1.586	1.40909	-0.0780099	-0.0661457
221.6	-0.0587222	-0.0657096	-0.0661188	-0.0693846	1.58649	1.40953	-0.0778221	-0.0662809
221.8	-0.0588441	-0.0659882	-0.066031	-0.0695422	1.58694	1.41031	-0.0779387	-0.0660015
222	-0.0593426	-0.0659046	-0.0654126	-0.0694	1.58769	1.41134	-0.077718	-0.0659089
222.2	-0.0597476	-0.0660118	-0.0655946	-0.0697459	1.5881	1.41189	-0.0775729	-0.066061
222.4	-0.0601631	-0.0662085	-0.0650494	-0.0703367	1.58876	1.41259	-0.0772554	-0.0658492
222.6	-0.060517	-0.0656585	-0.0646546	-0.0702647	1.58946	1.41381	-0.0771687	-0.065256
222.8	-0.0603634	-0.0654865	-0.0645017	-0.0706524	1.58974	1.41422	-0.0773608	-0.065067
223	-0.0603746	-0.0652568	-0.0643418	-0.0710998	1.59063	1.415	-0.0771111	-0.0649722
223.2	-0.0610824	-0.0654956	-0.0644304	-0.0710232	1.59123	1.41582	-0.0768554	-0.0652463
223.4	-0.0611769	-0.0652955	-0.0638249	-0.0707986	1.5921	1.41619	-0.0768575	-0.0651809
223.6	-0.0612738	-0.064882	-0.0635304	-0.070891	1.59263	1.41721	-0.0763837	-0.0654192
223.8	-0.0611038	-0.0652626	-0.0634965	-0.0709415	1.59267	1.41746	-0.0762542	-0.0652304
224	-0.0605458	-0.065142	-0.0637867	-0.0707351	1.59328	1.41818	-0.0766668	-0.0650534
224.2	-0.0599168	-0.0651269	-0.0638782	-0.070129	1.59443	1.41842	-0.0767467	-0.0653807
224.4	-0.0594225	-0.064746	-0.0642851	-0.0702761	1.59499	1.41935	-0.0773004	-0.0654687
224.6	-0.0588783	-0.0645904	-0.0647956	-0.0699197	1.59574	1.42005	-0.0767508	-0.0657614
224.8	-0.0590718	-0.0646084	-0.0647418	-0.0699303	1.59678	1.42061	-0.076596	-0.0657315
225	-0.0592157	-0.0645277	-0.065187	-0.0700087	1.59752	1.4215	-0.0769563	-0.0660226
225.2	-0.0588739	-0.0645171	-0.0655346	-0.0698479	1.59822	1.42138	-0.0768827	-0.0664857
225.4	-0.0584234	-0.0646449	-0.0655071	-0.0701413	1.59867	1.42101	-0.0768746	-0.0664177
225.6	-0.0581319	-0.0650734	-0.065657	-0.070635	1.59941	1.42173	-0.0769667	-0.0669148
225.8	-0.0580811	-0.0651562	-0.065467	-0.0710088	1.60007	1.4221	-0.0769335	-0.0668653
226	-0.0583762	-0.0653736	-0.0653678	-0.0711896	1.60053	1.42203	-0.0766529	-0.0672543
226.2	-0.0581083	-0.0659387	-0.0655299	-0.0712273	1.60115	1.4222	-0.0763528	-0.0676204
226.4	-0.0585307	-0.0657841	-0.0650462	-0.071505	1.60168	1.42272	-0.0765112	-0.0672705
226.6	-0.058651	-0.0657046	-0.0649667	-0.0711778	1.60191	1.42314	-0.0768113	-0.0667875
226.8	-0.0584539	-0.0659038	-0.0648035	-0.0714517	1.60245	1.42323	-0.0766628	-0.0673447
227	-0.0583727	-0.0658931	-0.0648888	-0.0715627	1.60292	1.42399	-0.0761836	-0.0674153
227.2	-0.0584871	-0.0663184	-0.0647026	-0.0712428	1.60306	1.42461	-0.076718	-0.0675959
227.4	-0.0583153	-0.0661568	-0.064475	-0.0715004	1.6031	1.42492	-0.076781	-0.0675412
227.6	-0.0581693	-0.0660947	-0.0646949	-0.0719347	1.60341	1.42548	-0.0767408	-0.067105
227.8	-0.057569	-0.0659652	-0.0650641	-0.0718601	1.60328	1.42572	-0.076819	-0.0667581
228	-0.0574863	-0.0652935	-0.0650712	-0.0716597	1.60398	1.42615	-0.0769073	-0.066733
228.2	-0.0572147	-0.0654426	-0.0650657	-0.0715401	1.60468	1.42658	-0.0765083	-0.0673302
228.4	-0.0570164	-0.0648936	-0.0651267	-0.0714037	1.60515	1.42684	-0.0763324	-0.0674122
228.6	-0.0573297	-0.0649038	-0.0653741	-0.0716159	1.60612	1.42679	-0.0761712	-0.0677885
228.8	-0.0578913	-0.0646836	-0.0654936	-0.0714388	1.60701	1.42766	-0.0763722	-0.067572
229	-0.0582665	-0.0642779	-0.0657108	-0.0717964	1.60721	1.42845	-0.0765825	-0.0675223
229.2	-0.0584713	-0.0643524	-0.0658684	-0.0718995	1.60773	1.42786	-0.0765387	-0.0675645
229.4	-0.0590508	-0.0647877	-0.0658143	-0.0723567	1.6085	1.42825	-0.0765445	-0.0672773
229.6	-0.0596699	-0.0650198	-0.0662334	-0.0724556	1.60883	1.42922	-0.0768526	-0.0676818
229.8	-0.0601315	-0.0652147	-0.0661341	-0.0721791	1.60963	1.42968	-0.0769312	-0.0674137
230	-0.0604055	-0.0656565	-0.0665447	-0.0717712	1.61033	1.43009	-0.0771368	-0.067534
230.2	-0.060439	-0.0658168	-0.0663069	-0.0711716	1.61118	1.43074	-0.0775175	-0.0674469
230.4	-0.0605873	-0.0660843	-0.0661001	-0.0707636	1.61193	1.43124	-0.0776828	-0.0670607
230.6	-0.060458	-0.0666832	-0.0662023	-0.0703216	1.61269	1.43179	-0.0778396	-0.0670107
230.8	-0.0603501	-0.0665064	-0.0662023	-0.0699452	1.61375	1.43248	-0.078025	-0.0673737
231	-0.0600989	-0.066339	-0.0663677	-0.0698055	1.61419	1.43334	-0.0784431	-0.0676061
231.2	-0.0600038	-0.0667149	-0.066613	-0.0694828	1.61461	1.43366	-0.0790892	-0.0676981
231.4	-0.0598991	-0.066943	-0.0669882	-0.069751	1.61504	1.4341	-0.0790331	-0.0676701
231.6	-0.0594819	-0.0668102	-0.066966	-0.0697028	1.61545	1.43454	-0.079168	-0.0674982
231.8	-0.0590048	-0.0668581	-0.0670976	-0.0693376	1.61565	1.4354	-0.0791485	-0.0681529
232	-0.0588592	-0.0663341	-0.0669152	-0.0691786	1.61648	1.43606	-0.0790297	-0.0687222
232.2	-0.0584947	-0.0669002	-0.067004	-0.0690155	1.61674	1.43639	-0.0784543	-0.0689715
232.4	-0.0584706	-0.066744	-0.0664347	-0.0689065	1.61724	1.43627	-0.0779796	-0.0686623
232.6	-0.0590408	-0.066727	-0.0668215	-0.0695421	1.61816	1.43681	-0.0780885	-0.0687111
232.8	-0.059317	-0.0661201	-0.066841	-0.0696492	1.61864	1.43732	-0.0779475	-0.0683524
233	-0.0594686	-0.0662123	-0.0666216	-0.0701186	1.61836	1.43756	-0.0781732	-0.0683653
233.2	-0.0598363	-0.0661879	-0.0668561	-0.0700312	1.61843	1.43741	-0.0779328	-0.0680081
233.4	-0.0601799	-0.0660803	-0.0667157	-0.070472	1.61868	1.4381	-0.0783383	-0.0679279
233.6	-0.0601487	-0.0658108	-0.0667377	-0.0705905	1.61881	1.43877	-0.0787451	-0.0681961
233.8	-0.0599432	-0.0655032	-0.0667536	-0.0710917	1.61968	1.43882	-0.0788407	-0.0677142
234	-0.0599556	-0.065881	-0.0665653	-0.0710102	1.62015	1.4388	-0.0793036	-0.0677442
234.2	-0.0599407	-0.0659827	-0.0661872	-0.0709098	1.62072	1.43886	-0.0793157	-0.0675488
234.4	-0.0599395	-0.0661764	-0.0662653	-0.0712612	1.6214	1.43935	-0.0792219	-0.067572
234.6	-0.0599344	-0.0657026	-0.0668669	-0.0712607	1.62214	1.43983	-0.0795743	-0.0677876
234.8	-0.0598442	-0.0656227	-0.0670093	-0.0713364	1.62302	1.44043	-0.079538	-0.0677578
235	-0.0595445	-0.0658666	-0.0671121	-0.0713747	1.62383	1.44067	-0.0797663	-0.0682944
235.2	-0.0596624	-0.0661621	-0.0670514	-0.0717124	1.62428	1.44151	-0.079558	-0.0682324
235.4	-0.0596114	-0.0659734	-0.067233	-0.0715348	1.62473	1.4426	-0.0792055	-0.0682911
235.6	-0.0594876	-0.0654436	-0.0669185	-0.0716157	1.625	1.44386	-0.0787605	-0.0688118
235.8	-0.0591902	-0.0653742	-0.0662774	-0.0710317	1.62562	1.44506	-0.0781405	-0.0696444
236	-0.0594537	-0.0649812	-0.0659359	-0.0705058	1.62611	1.44596	-0.0775648	-0.0698061
236.2	-0.0596972	-0.0654855	-0.065499	-0.0702487	1.62586	1.44654	-0.0770583	-0.0699132
236.4	-0.0599673	-0.0655196	-0.0649669	-0.0702541	1.62644	1.44759	-0.0771386	-0.0697872
236.6	-0.0602468	-0.0652843	-0.0651641	-0.070059	1.62733	1.44869	-0.0772761	-0.070065
236.8	-0.0602455	-0.065132	-0.0647091	-0.0697965	1.62775	1.44938	-0.0773354	-0.0701622
237	-0.0601921	-0.0650086	-0.0646393	-0.0692975	1.62774	1.4497	-0.0778127	-0.0700875
237.2	-0.0604122	-0.0646816	-0.0644508	-0.0693115	1.62813	1.44982	-0.0781381	-0.0699978
237.4	-0.06017	-0.0650816	-0.0644057	-0.0693487	1.62886	1.45008	-0.0786288	-0.0702457
237.6	-0.0599445	-0.0652867	-0.0643391	-0.0694726	1.62929	1.45007	-0.0787779	-0.0702232
237.8	-0.0597688	-0.0655211	-0.0645826	-0.0698845	1.62988	1.45007	-0.0791477	-0.0696518
238	-0.0598388	-0.0661175	-0.0644837	-0.0698031	1.63022	1.44998	-0.0796477	-0.0692774
238.2	-0.0594305	-0.0663669	-0.0646987	-0.0699653	1.63044	1.45007	-0.0793249	-0.069041
238.4	-0.0590481	-0.06643	-0.0652976	-0.0704501	1.63117	1.45027	-0.0799358	-0.0690489
238.6	-0.0585262	-0.0666675	-0.0657982	-0.0707109	1.63186	1.45028	-0.0796607	-0.068878
238.8	-0.0581502	-0.067372	-0.0662498	-0.070892	1.63267	1.45023	-0.0795336	-0.0684591
239	-0.0578867	-0.0669858	-0.0664117	-0.0716291	1.63311	1.45049	-0.0798331	-0.0685043
239.2	-0.0583095	-0.0669745	-0.0667028	-0.0719972	1.63291	1.45091	-0.0794535	-0.068521
239.4	-0.0580094	-0.0667893	-0.067076	-0.0720306	1.63325	1.45119	-0.0792165	-0.0688597
239.6	-0.0577084	-0.0665855	-0.0668916	-0.072488	1.63338	1.45157	-0.0791277	-0.0691744
239.8	-0.0578603	-0.066727	-0.0670077	-0.0723029	1.63375	1.4514	-0.0788681	-0.0689853
240	-0.0583494	-0.0667716	-0.067216	-0.0725162	1.63382	1.4522	-0.0788072	-0.0688573
240.2	-0.0588465	-0.0670142	-0.0672452	-0.0726298	1.63436	1.45288	-0.0787221	-0.069044
240.4	-0.0592338	-0.0668167	-0.0675471	-0.0723525	1.63544	1.45341	-0.0786925	-0.0688077
240.6	-0.0593521	-0.0665403	-0.0674676	-0.0721355	1.63626	1.4542	-0.0786892	-0.0690522
240.8	-0.0595218	-0.0661369	-0.0675864	-0.0723257	1.63714	1.4544	-0.0786594	-0.068975
241	-0.0596173	-0.0655588	-0.0679969	-0.0721086	1.6375	1.4549	-0.0785566	-0.0686574
241.2	-0.0599664	-0.0651241	-0.0678087	-0.0722972	1.63776	1.45541	-0.0787372	-0.0686962
241.4	-0.0597424	-0.065449	-0.0680912	-0.0721651	1.63832	1.45573	-0.0784031	-0.0686761
241.6	-0.0601739	-0.0651555	-0.0676363	-0.0725637	1.63872	1.45626	-0.0784873	-0.0687293
241.8	-0.0604486	-0.0651039	-0.067465	-0.0727708	1.6392	1.45694	-0.0788764	-0.0683085
242	-0.0602117	-0.0654163	-0.067436	-0.0729164	1.63949	1.45726	-0.0789608	-0.0682988
242.2	-0.0598041	-0.0653486	-0.0670569	-0.0725375	1.63974	1.45794	-0.0790297	-0.0686737
242.4	-0.0596051	-0.0654732	-0.0670199	-0.0726923	1.64039	1.45858	-0.0788779	-0.0683995
242.6	-0.0594925	-0.0659895	-0.0667891	-0.0726318	1.641	1.45905	-0.0783726	-0.0686449
242.8	-0.0594242	-0.0661456	-0.0667333	-0.0721989	1.6416	1.45912	-0.0785132	-0.0689023
243	-0.059288	-0.0660985	-0.0664336	-0.0722683	1.64198	1.45978	-0.0787155	-0.0692256
243.2	-0.0591752	-0.066485	-0.0662359	-0.0719361	1.64247	1.46028	-0.0788617	-0.0695633
243.4	-0.0586219	-0.0666662	-0.0661865	-0.0715322	1.64309	1.46088	-0.0789948	-0.0696684
243.6	-0.0586875	-0.0668045	-0.0660994	-0.0713975	1.64348	1.46159	-0.0789472	-0.0697489
243.8	-0.0588725	-0.067149	-0.0662132	-0.0713186	1.6444	1.46175	-0.0784895	-0.0692896
244	-0.0592043	-0.0674249	-0.0661891	-0.0714659	1.64513	1.46214	-0.0783163	-0.0692975
244.2	-0.0593975	-0.067443	-0.0661612	-0.0713742	1.64638	1.46234	-0.0784693	-0.069698
244.4	-0.05897	-0.0671832	-0.0662854	-0.0709137	1.64697	1.46285	-0.0781525	-0.0697107
244.6	-0.0591055	-0.0669989	-0.0665227	-0.0710521	1.64797	1.46335	-0.0785949	-0.0699303
244.8	-0.0591157	-0.06649	-0.0667951	-0.0715419	1.64859	1.46387	-0.0786447	-0.0694688
245	-0.0592315	-0.0663278	-0.0673172	-0.0718249	1.64862	1.46441	-0.0787356	-0.0690679
245.2	-0.0591934	-0.066459	-0.0671989	-0.0721817	1.64877	1.46453	-0.0790102	-0.0692052
245.4	-0.0596795	-0.0669049	-0.067302	-0.0724411	1.64936	1.4649	-0.0789635	-0.0693365
245.6	-0.0599234	-0.0665547	-0.0673724	-0.0731771	1.64991	1.46561	-0.0791413	-0.0695254
245.8	-0.0599181	-0.0666043	-0.0675193	-0.0728568	1.65017	1.46578	-0.0792123	-0.0691308
246	-0.0596999	-0.0669042	-0.0676073	-0.0728538	1.65046	1.4658	-0.0791999	-0.0686606
246.2	-0.0597201	-0.0669983	-0.0671575	-0.0726823	1.65092	1.46634	-0.0791136	-0.0683396
246.4	-0.0600856	-0.0674604	-0.0676593	-0.0729576	1.65155	1.46675	-0.0782439	-0.0683097
246.6	-0.0605449	-0.0677735	-0.0674199	-0.0727123	1.65179	1.46685	-0.0785896	-0.0685762
246.8	-0.0608129	-0.0678348	-0.0674804	-0.0721939	1.65206	1.46709	-0.0787369	-0.0686612
247	-0.0608959	-0.0678415	-0.0674096	-0.0718122	1.65252	1.46781	-0.0796308	-0.0687928
247.2	-0.0610156	-0.0681958	-0.0673867	-0.071495	1.65313	1.46816	-0.0803573	-0.0692309
247.4	-0.0615002	-0.0683811	-0.0674285	-0.0706966	1.65361	1.46852	-0.0802875	-0.0697787
247.6	-0.0619238	-0.0689025	-0.0671285	-0.0707531	1.65429	1.4685	-0.080319	-0.0699664
247.8	-0.0621551	-0.0690446	-0.0670165	-0.0707179	1.65529	1.46764	-0.0803907	-0.069872
248	-0.0623657	-0.0692797	-0.066953	-0.0703388	1.656	1.46816	-0.0809563	-0.0704089
248.2	-0.0627041	-0.0690243	-0.0666718	-0.0696677	1.65671	1.46892	-0.0817716	-0.0710287
248.4	-0.062917	-0.0692456	-0.0667988	-0.0697035	1.65724	1.46927	-0.0816873	-0.0713738
248.6	-0.0632134	-0.0692101	-0.0674216	-0.0702272	1.65778	1.46962	-0.08252	-0.0715335
248.8	-0.0630395	-0.0691601	-0.06711	-0.0707194	1.6578	1.47046	-0.0824243	-0.0714285
249	-0.0632462	-0.0694024	-0.0674945	-0.0715005	1.65841	1.47055	-0.082358	-0.0717988
249.2	-0.063345	-0.069578	-0.067158	-0.071681	1.65883	1.47124	-0.0819206	-0.072308
249.4	-0.0634256	-0.069623	-0.067445	-0.0720687	1.65952	1.47217	-0.0815201	-0.07217
249.6	-0.0631135	-0.0694143	-0.0675048	-0.0722787	1.65995	1.47276	-0.081507	-0.0717924
249.8	-0.0630652	-0.0695842	-0.067355	-0.072232	1.6603	1.47317	-0.0813157	-0.0715138
250	-0.0630221	-0.0698924	-0.067431	-0.0729747	1.66088	1.47394	-0.0807549	-0.0708533
250.2	-0.063134	-0.0696307	-0.067274	-0.0732149	1.66136	1.47496	-0.0805636	-0.0708825
250.4	-0.062826	-0.0694735	-0.0676665	-0.07342	1.66146	1.47552	-0.0799598	-0.0709178
250.6	-0.0626716	-0.0691405	-0.0676793	-0.0732412	1.66137	1.47629	-0.0801931	-0.0705845
250.8	-0.062488	-0.0688033	-0.0677309	-0.0730597	1.66217	1.47675	-0.0799522	-0.0706149
251	-0.0621805	-0.0688489	-0.0679733	-0.073105	1.66254	1.47697	-0.0802014	-0.070459
251.2	-0.0622512	-0.0690243	-0.0679725	-0.0729667	1.66304	1.47709	-0.0797793	-0.0704674
251.4	-0.0622862	-0.0688376	-0.0681258	-0.0724615	1.66324	1.47704	-0.0793723	-0.0702114
251.6	-0.0618973	-0.0687713	-0.068127	-0.0722004	1.66373	1.47662	-0.0795896	-0.0696748
251.8	-0.0616952	-0.0684925	-0.0682385	-0.0718639	1.66443	1.47699	-0.0795116	-0.069293
252	-0.0615114	-0.0683708	-0.0685956	-0.0715154	1.66476	1.4775	-0.0794968	-0.0694329
252.2	-0.0618001	-0.0682381	-0.0685214	-0.071814	1.66482	1.47752	-0.0798392	-0.0692937
252.4	-0.061292	-0.0682896	-0.0686657	-0.0724215	1.66524	1.47763	-0.0794525	-0.0695208
252.6	-0.0608635	-0.0679998	-0.0689575	-0.0725778	1.66564	1.47824	-0.0797552	-0.069819
252.8	-0.0605522	-0.0683884	-0.0685213	-0.0730115	1.66629	1.47851	-0.0796796	-0.0700273
253	-0.0604263	-0.068462	-0.0686139	-0.0736972	1.66744	1.47872	-0.0794818	-0.0705823
253.2	-0.060575	-0.0685439	-0.0685004	-0.0734771	1.66813	1.47959	-0.0791654	-0.0705684
253.4	-0.0601645	-0.0688272	-0.0686868	-0.0735829	1.66891	1.48012	-0.079226	-0.0704145
253.6	-0.0604294	-0.068837	-0.0683618	-0.0740265	1.66938	1.48041	-0.0798118	-0.0708552
253.8	-0.0608074	-0.0691972	-0.0678742	-0.0743565	1.66972	1.48117	-0.0799645	-0.0711557
254	-0.0611467	-0.0692825	-0.067773	-0.074457	1.67006	1.48202	-0.0802459	-0.0713818
254.2	-0.0616917	-0.0693169	-0.0676162	-0.0743077	1.67019	1.48275	-0.080934	-0.0717095
254.4	-0.0616671	-0.0695897	-0.0681056	-0.074357	1.67063	1.48299	-0.081158	-0.071992
254.6	-0.0619502	-0.0696377	-0.0681004	-0.0741157	1.67105	1.48362	-0.081569	-0.0715537
254.8	-0.0624157	-0.0697584	-0.0677245	-0.0742826	1.67171	1.4836	-0.0815627	-0.0715798
255	-0.0622464	-0.070327	-0.0678501	-0.0741227	1.67154	1.48408	-0.0815586	-0.0708847
255.2	-0.0626151	-0.0702077	-0.0676879	-0.0738522	1.67162	1.48446	-0.0813745	-0.0706771
255.4	-0.0623073	-0.0697989	-0.06785	-0.0734021	1.67178	1.48471	-0.0812841	-0.0703015
255.6	-0.0624787	-0.0695947	-0.0678518	-0.0730278	1.67235	1.48505	-0.0815301	-0.0700491
255.8	-0.0621932	-0.0698587	-0.0678774	-0.0730278	1.67266	1.48537	-0.0816489	-0.0699014
256	-0.0619807	-0.0697066	-0.0679576	-0.0730512	1.67266	1.48549	-0.0816954	-0.0696917
256.2	-0.0621143	-0.0695009	-0.0680117	-0.0730318	1.67293	1.48635	-0.0817205	-0.0692843
256.4	-0.0616957	-0.0694432	-0.0675007	-0.0730732	1.67372	1.48691	-0.0814871	-0.0691488
256.6	-0.0609642	-0.0694152	-0.0674131	-0.0733816	1.67467	1.48761	-0.0813363	-0.0693928
256.8	-0.0606303	-0.0694872	-0.0674161	-0.0737568	1.67577	1.48817	-0.0809486	-0.0691303
257	-0.0604187	-0.0690614	-0.0676928	-0.0733407	1.67681	1.48884	-0.0802823	-0.0693109
257.2	-0.0603146	-0.06888	-0.0679048	-0.0732774	1.67749	1.48937	-0.0803783	-0.0693237
257.4	-0.0601377	-0.0688258	-0.0679667	-0.0735472	1.67766	1.48934	-0.0799853	-0.0693552
257.6	-0.0603981	-0.0686653	-0.0673504	-0.0737712	1.67836	1.48995	-0.0802247	-0.0696021
257.8	-0.0605002	-0.0689397	-0.0671806	-0.0737314	1.67852	1.49039	-0.0803468	-0.0698055
258	-0.0607923	-0.0689594	-0.0673461	-0.0735842	1.67913	1.49111	-0.0804144	-0.0700897
258.2	-0.0611652	-0.069324	-0.0673268	-0.0735578	1.67969	1.49144	-0.0805315	-0.0699177
258.4	-0.0612287	-0.0695823	-0.067059	-0.0735916	1.68071	1.49174	-0.080348	-0.0697665
258.6	-0.0610368	-0.0695413	-0.0666536	-0.0736326	1.68095	1.49243	-0.0801537	-0.0698539
258.8	-0.0611886	-0.069756	-0.0667372	-0.0738705	1.6815	1.49332	-0.0795549	-0.0696819
259	-0.0610874	-0.0694174	-0.0666459	-0.0735188	1.68202	1.49376	-0.079167	-0.0693372
259.2	-0.0613187	-0.0694672	-0.0667085	-0.0734666	1.68237	1.49393	-0.0791227	-0.0695152
259.4	-0.0614538	-0.0699269	-0.0670918	-0.0737508	1.68277	1.49441	-0.0793675	-0.0697287
259.6	-0.0620083	-0.0702467	-0.0672216	-0.0738216	1.68318	1.49438	-0.0795807	-0.0700427
259.8	-0.0617379	-0.0703686	-0.0673532	-0.0733545	1.68359	1.49413	-0.0801871	-0.0701444
260	-0.0619868	-0.0707309	-0.067462	-0.0730096	1.68402	1.49485	-0.080003	-0.0703457
260.2	-0.0623089	-0.0706931	-0.0673031	-0.0733974	1.6846	1.49494	-0.080149	-0.0708334
260.4	-0.0617085	-0.0708439	-0.0674682	-0.0734817	1.68543	1.49479	-0.0803562	-0.071166
260.6	-0.0611629	-0.0706111	-0.0681392	-0.0737022	1.68575	1.49484	-0.0808364	-0.0717167
260.8	-0.0611879	-0.0708702	-0.068857	-0.0735273	1.68606	1.49513	-0.0811798	-0.071889
261	-0.0608793	-0.0706114	-0.0693592	-0.0731399	1.68627	1.49509	-0.0812634	-0.0721164
261.2	-0.0606026	-0.0705922	-0.0693414	-0.073161	1.68656	1.49489	-0.0816273	-0.0723128
261.4	-0.06075	-0.0706216	-0.0695831	-0.0730305	1.68644	1.49519	-0.0816415	-0.0721132
261.6	-0.0604679	-0.070124	-0.06949	-0.0727448	1.68675	1.49601	-0.0823673	-0.0724763
261.8	-0.0603318	-0.0701303	-0.0701268	-0.0724135	1.68674	1.49608	-0.0825202	-0.0723958
262	-0.0604192	-0.070463	-0.0699999	-0.0726564	1.68681	1.4969	-0.0822406	-0.071815
262.2	-0.0602331	-0.0704313	-0.0699152	-0.0727504	1.68727	1.49707	-0.0817874	-0.0717229
262.4	-0.0602079	-0.0703661	-0.0698475	-0.0726362	1.68761	1.49762	-0.0814397	-0.0714359
262.6	-0.0600856	-0.0698842	-0.0700699	-0.0727556	1.68787	1.49838	-0.0810685	-0.0713887
262.8	-0.0604933	-0.0698713	-0.0701157	-0.0724045	1.68859	1.49893	-0.0805793	-0.0705216
263	-0.0610999	-0.0693297	-0.0701431	-0.0723013	1.68869	1.49854	-0.080373	-0.0702408
263.2	-0.0613491	-0.0700187	-0.0701255	-0.0727231	1.68873	1.49893	-0.0804856	-0.0703157
263.4	-0.0615201	-0.0699655	-0.0704895	-0.0727495	1.68906	1.49944	-0.0803995	-0.070688
263.6	-0.0618271	-0.069691	-0.0702089	-0.0725114	1.68984	1.49986	-0.0801418	-0.070634
263.8	-0.0617678	-0.0700164	-0.070168	-0.0720488	1.69045	1.50001	-0.0803115	-0.071092
264	-0.0615597	-0.0701581	-0.0699714	-0.0725681	1.69102	1.5009	-0.0797197	-0.0710194
264.2	-0.0613514	-0.0699691	-0.0696897	-0.0732792	1.69136	1.50083	-0.0798379	-0.0713905
264.4	-0.0610548	-0.0701707	-0.0699211	-0.0735798	1.69189	1.50143	-0.079778	-0.0716461
264.6	-0.0611062	-0.0701338	-0.0694958	-0.0741969	1.69236	1.50201	-0.0801033	-0.0717089
264.8	-0.0609704	-0.069749	-0.0693173	-0.0744237	1.6929	1.5025	-0.0800394	-0.0721929
265	-0.0610845	-0.0693808	-0.0690015	-0.0746074	1.69342	1.5029	-0.0801117	-0.0721166
265.2	-0.061266	-0.0692125	-0.0689321	-0.0745211	1.69407	1.50342	-0.0803686	-0.0723254
265.4	-0.0616257	-0.0691019	-0.0691782	-0.0748748	1.69419	1.50413	-0.0806237	-0.0724122
265.6	-0.0615905	-0.0685793	-0.0690759	-0.0748579	1.69466	1.50431	-0.0808227	-0.0727957
265.8	-0.0617983	-0.0688288	-0.0690165	-0.0752351	1.6953	1.50458	-0.0806637	-0.0728513
266	-0.0619531	-0.0689665	-0.0684494	-0.0759792	1.69535	1.50494	-0.0803297	-0.072856
266.2	-0.0617781	-0.068699	-0.0686639	-0.0761316	1.69605	1.50527	-0.0805082	-0.0730632
266.4	-0.0619467	-0.0685038	-0.0689171	-0.0762198	1.69632	1.50568	-0.0805857	-0.0728989
266.6	-0.0622777	-0.0679015	-0.0689452	-0.0758139	1.69668	1.50602	-0.0806282	-0.0725923
266.8	-0.0626087	-0.0676966	-0.0691382	-0.0751677	1.69664	1.50624	-0.080937	-0.0723644
267	-0.0627785	-0.0675094	-0.0693404	-0.0752952	1.69667	1.50651	-0.0809966	-0.0719226
267.2	-0.0627494	-0.0678852	-0.069203	-0.0751246	1.69724	1.50689	-0.0810798	-0.0722914
267.4	-0.0626585	-0.0677745	-0.0693591	-0.0743202	1.69786	1.5075	-0.0811136	-0.0720363
267.6	-0.0623075	-0.0680212	-0.0690768	-0.0745574	1.69853	1.50828	-0.0812537	-0.0716701
267.8	-0.062139	-0.068262	-0.0689948	-0.0744327	1.6989	1.50834	-0.081268	-0.0720148
268	-0.0617765	-0.0681481	-0.0687301	-0.0742287	1.69879	1.50908	-0.0812034	-0.0712079
268.2	-0.0616295	-0.0686153	-0.068601	-0.0743945	1.69907	1.5096	-0.0814804	-0.071524
268.4	-0.0616705	-0.0688097	-0.0685527	-0.0741211	1.69967	1.51024	-0.0817318	-0.0716504
268.6	-0.0615804	-0.0687645	-0.0686933	-0.0739552	1.70028	1.51075	-0.0817643	-0.0714415
268.8	-0.0617827	-0.0686861	-0.068742	-0.0733692	1.70081	1.51104	-0.0817417	-0.0719659
269	-0.062405	-0.069236	-0.0690942	-0.0732429	1.7013	1.51186	-0.0818762	-0.071557
269.2	-0.0622659	-0.0690669	-0.0694265	-0.0731425	1.70193	1.51201	-0.082063	-0.0719317
269.4	-0.0619874	-0.069445	-0.0698726	-0.0730293	1.70225	1.51229	-0.0823793	-0.0723373
269.6	-0.0618261	-0.0694241	-0.0698254	-0.0730577	1.70255	1.51257	-0.0823635	-0.073202
269.8	-0.0615752	-0.0697345	-0.0694903	-0.0738525	1.70292	1.513	-0.0823894	-0.0735334
270	-0.0615019	-0.0698477	-0.0695694	-0.0741243	1.70303	1.51312	-0.0825148	-0.0737769
270.2	-0.0613293	-0.0698245	-0.0700837	-0.0742747	1.70385	1.51333	-0.0822998	-0.0741007
270.4	-0.0613798	-0.0697372	-0.0697553	-0.0741145	1.70435	1.51359	-0.0822028	-0.0740435
270.6	-0.0614771	-0.0695608	-0.0693242	-0.0739361	1.70462	1.51371	-0.082231	-0.0739154
270.8	-0.0614956	-0.0696954	-0.0688727	-0.074567	1.70461	1.51382	-0.0818545	-0.0736557
271	-0.0617983	-0.0697781	-0.0686189	-0.0747607	1.7049	1.51408	-0.0815851	-0.0732902
271.2	-0.0618084	-0.0700315	-0.0680412	-0.074735	1.70556	1.51421	-0.0815542	-0.0729229
271.4	-0.0618847	-0.0700474	-0.0677659	-0.0750852	1.70625	1.51475	-0.0817203	-0.072609
271.6	-0.0617675	-0.0702048	-0.0678296	-0.0759372	1.70624	1.51535	-0.081772	-0.0723289
271.8	-0.0620427	-0.0703506	-0.0676136	-0.0759463	1.7063	1.51509	-0.081726	-0.0721189
272	-0.0620983	-0.0706428	-0.0677985	-0.0756113	1.7065	1.51567	-0.0815043	-0.0714838
272.2	-0.0621222	-0.071021	-0.0681731	-0.075815	1.70726	1.51574	-0.0812925	-0.0713686
272.4	-0.0624889	-0.0711723	-0.0684958	-0.0755167	1.70759	1.51581	-0.0807024	-0.0710066
272.6	-0.0625386	-0.0714903	-0.0689029	-0.0755228	1.70774	1.51616	-0.0803123	-0.070839
272.8	-0.0625893	-0.0716378	-0.0688977	-0.0752889	1.70822	1.51645	-0.0803294	-0.070681
273	-0.0627165	-0.0714377	-0.0694139	-0.0754607	1.70888	1.51704	-0.0806447	-0.0705957
273.2	-0.0621932	-0.0708823	-0.0696194	-0.0752146	1.70926	1.51708	-0.0810894	-0.0705081
273.4	-0.0621495	-0.0711374	-0.0697143	-0.0751033	1.71013	1.51783	-0.0810896	-0.0709548
273.6	-0.0621377	-0.0708714	-0.0693856	-0.0752468	1.71066	1.51808	-0.0811114	-0.0715801
273.8	-0.0622132	-0.0711688	-0.0690713	-0.0754067	1.71126	1.51848	-0.081617	-0.0718054
274	-0.062322	-0.0711135	-0.069076	-0.0750266	1.71182	1.51913	-0.0819132	-0.0719411
274.2	-0.0623923	-0.0710631	-0.0686418	-0.0749255	1.7128	1.51971	-0.0819164	-0.0725593
274.4	-0.0625832	-0.0713226	-0.0682391	-0.0748985	1.71316	1.52024	-0.0821921	-0.0726266
274.6	-0.0628189	-0.0714158	-0.067852	-0.0748852	1.71336	1.52022	-0.0823297	-0.0729894
274.8	-0.0631328	-0.0716518	-0.0678351	-0.0751805	1.71392	1.52046	-0.0823376	-0.0728124
275	-0.0634028	-0.071924	-0.0679051	-0.074858	1.71455	1.52106	-0.0825808	-0.0727742
275.2	-0.0632561	-0.0723945	-0.0677277	-0.0754294	1.71533	1.5214	-0.0827463	-0.072535
275.4	-0.0635855	-0.0722964	-0.0685804	-0.0761553	1.71539	1.52187	-0.0829595	-0.0729027
275.6	-0.0637744	-0.0724709	-0.0684046	-0.0758966	1.71563	1.5223	-0.083142	-0.0725812
275.8	-0.0637899	-0.0727322	-0.06826	-0.076289	1.716	1.52205	-0.0831391	-0.0723531
276	-0.0639071	-0.07284	-0.0689759	-0.0763998	1.71633	1.52217	-0.0832105	-0.0720985
276.2	-0.0641031	-0.0728304	-0.069712	-0.0765902	1.71633	1.52198	-0.0830183	-0.0719658
276.4	-0.0644053	-0.07322	-0.0697861	-0.0767279	1.71674	1.52246	-0.0826813	-0.0716456
276.6	-0.0642007	-0.0729156	-0.0703596	-0.0767952	1.71706	1.52287	-0.0826444	-0.0714232
276.8	-0.0640327	-0.0723556	-0.0706548	-0.0767112	1.71718	1.52269	-0.0828756	-0.0709996
277	-0.0640861	-0.0715293	-0.070965	-0.0764333	1.71779	1.52312	-0.0829113	-0.0711356
277.2	-0.0636026	-0.0713352	-0.0708602	-0.0761161	1.71782	1.52371	-0.0829327	-0.0711423
277.4	-0.0632957	-0.0710835	-0.0706815	-0.0760234	1.71808	1.5243	-0.082435	-0.07166
277.6	-0.0632271	-0.0707803	-0.070475	-0.0755856	1.71835	1.52427	-0.0824397	-0.0720952
277.8	-0.0636	-0.0707087	-0.0701875	-0.0751592	1.71847	1.5248	-0.082723	-0.072572
278	-0.0635236	-0.0707699	-0.069902	-0.0751114	1.71856	1.52537	-0.0827542	-0.0728795
278.2	-0.0636657	-0.0707384	-0.0694664	-0.0752005	1.71898	1.52544	-0.0823995	-0.0734324
278.4	-0.0640404	-0.0708397	-0.0693855	-0.0750519	1.71909	1.5255	-0.0821628	-0.0734201
278.6	-0.0639947	-0.0709865	-0.0690016	-0.0750281	1.71911	1.52547	-0.082201	-0.0735297
278.8	-0.0642276	-0.071062	-0.0690291	-0.0753674	1.71967	1.52582	-0.0820888	-0.0733921
279	-0.0640898	-0.071214	-0.0687414	-0.075307	1.72	1.52602	-0.0825286	-0.0733797
279.2	-0.064033	-0.0713071	-0.0691006	-0.0758094	1.72033	1.52639	-0.0828647	-0.0736312
279.4	-0.0644115	-0.071051	-0.0691987	-0.0754435	1.72083	1.52711	-0.0834301	-0.0735663
279.6	-0.0646957	-0.0711292	-0.0689261	-0.0752582	1.72189	1.52754	-0.0833789	-0.0735106
279.8	-0.0646782	-0.0710902	-0.069321	-0.0758823	1.7226	1.52798	-0.0833478	-0.0732106
280	-0.0651702	-0.071458	-0.0699743	-0.0755322	1.72342	1.52838	-0.0839279	-0.0729821
280.2	-0.065296	-0.0714302	-0.0700694	-0.0756312	1.72406	1.52907	-0.0838556	-0.0727032
280.4	-0.0654261	-0.0716289	-0.0702161	-0.0756067	1.72495	1.52991	-0.0837773	-0.0725226
280.6	-0.0654752	-0.0708272	-0.0709422	-0.0758384	1.72542	1.52998	-0.0837256	-0.0724133
280.8	-0.065486	-0.0706625	-0.0710196	-0.0758728	1.72558	1.53012	-0.0837368	-0.0726726
281	-0.0655347	-0.0703901	-0.0713259	-0.0757167	1.7265	1.53069	-0.0833853	-0.0730527
281.2	-0.0658118	-0.0702019	-0.0712375	-0.0754845	1.72664	1.53105	-0.0830504	-0.073276
281.4	-0.0654991	-0.069945	-0.0712316	-0.0755406	1.72676	1.53078	-0.0825405	-0.0731572
281.6	-0.065507	-0.070196	-0.0715061	-0.0755203	1.72747	1.53083	-0.0823155	-0.0734011
281.8	-0.0657703	-0.070111	-0.0715616	-0.0755093	1.72737	1.53103	-0.082604	-0.0730914
282	-0.0655387	-0.0703968	-0.0718135	-0.075846	1.72706	1.53099	-0.0824558	-0.0726966
282.2	-0.0653957	-0.0703398	-0.071784	-0.0758498	1.72726	1.53098	-0.0822213	-0.0724909
282.4	-0.06559	-0.0701343	-0.0719003	-0.0757647	1.72701	1.53169	-0.0822106	-0.0724552
282.6	-0.0650528	-0.0703363	-0.0719314	-0.0759426	1.72703	1.5317	-0.082245	-0.0724981
282.8	-0.0647833	-0.070366	-0.0718871	-0.0759636	1.72725	1.53185	-0.082399	-0.0722867
283	-0.0642358	-0.0703552	-0.0720301	-0.0761229	1.72749	1.53212	-0.0826566	-0.0723389
283.2	-0.0638929	-0.0701495	-0.072541	-0.0763523	1.72771	1.5328	-0.0828472	-0.0721383
283.4	-0.0637346	-0.0698216	-0.0720832	-0.0762054	1.72861	1.53334	-0.0831761	-0.0719231
283.6	-0.0635716	-0.0703143	-0.0719535	-0.0764608	1.72896	1.5335	-0.082885	-0.0719019
283.8	-0.0631279	-0.0703387	-0.0714768	-0.0764573	1.72947	1.53381	-0.0829186	-0.0714218
284	-0.0629111	-0.0707573	-0.0713543	-0.0766021	1.72958	1.53392	-0.0835126	-0.0716872
284.2	-0.0623345	-0.0704084	-0.0713386	-0.0767405	1.73027	1.53433	-0.0833354	-0.071774
284.4	-0.0622136	-0.0706339	-0.0714441	-0.0767613	1.73124	1.5347	-0.0832133	-0.0719834
284.6	-0.0624526	-0.0704231	-0.0713693	-0.0769542	1.73171	1.53477	-0.0830256	-0.0720428
284.8	-0.0623094	-0.0707485	-0.0712987	-0.0770537	1.73263	1.53511	-0.0829242	-0.0723135
285	-0.0623823	-0.0706297	-0.0711132	-0.0769447	1.73352	1.53514	-0.0831823	-0.0723292
285.2	-0.0626197	-0.0706231	-0.0705928	-0.0766592	1.73417	1.53541	-0.083154	-0.0724061
285.4	-0.0619624	-0.0710772	-0.0706122	-0.07701	1.73504	1.53543	-0.083303	-0.0722998
285.6	-0.0627156	-0.071654	-0.0707857	-0.0765827	1.73576	1.53602	-0.083393	-0.0728493
285.8	-0.063297	-0.0717849	-0.0710088	-0.0761897	1.73624	1.53632	-0.083964	-0.0726341
286	-0.0633294	-0.0721939	-0.0711074	-0.0764495	1.73705	1.53671	-0.0841059	-0.0729929
286.2	-0.0636974	-0.0722282	-0.0710944	-0.0766333	1.73756	1.53786	-0.0839114	-0.0731119
286.4	-0.0640755	-0.0721948	-0.070958	-0.0765931	1.73785	1.53886	-0.0838128	-0.0727579
286.6	-0.0641168	-0.072256	-0.0710464	-0.076319	1.73828	1.53896	-0.0840321	-0.072703
286.8	-0.0641053	-0.0723403	-0.071065	-0.0762694	1.73836	1.53956	-0.0844687	-0.0724672
287	-0.0644172	-0.0722391	-0.0710356	-0.0767444	1.73894	1.53996	-0.0846176	-0.0725565
287.2	-0.0648751	-0.0723631	-0.0706808	-0.0768562	1.7389	1.54064	-0.0847922	-0.0727506
287.4	-0.0648416	-0.0727806	-0.0701581	-0.076625	1.73937	1.54077	-0.0846452	-0.0734305
287.6	-0.0646241	-0.0731766	-0.0700138	-0.0764929	1.73923	1.54122	-0.0842011	-0.0735201
287.8	-0.0644631	-0.0729692	-0.0700755	-0.0760762	1.73919	1.54169	-0.0839596	-0.0736135
288	-0.0644521	-0.0735389	-0.070251	-0.0761718	1.73905	1.54225	-0.0838254	-0.0741978
288.2	-0.0643911	-0.0736439	-0.0705321	-0.0758807	1.73927	1.54258	-0.0833856	-0.0738723
288.4	-0.0644278	-0.0740504	-0.0702327	-0.0759491	1.73914	1.54247	-0.0830025	-0.0734859
288.6	-0.0651295	-0.0744049	-0.0703742	-0.0760592	1.73899	1.54276	-0.0829826	-0.0738836
288.8	-0.0650052	-0.0745705	-0.0704214	-0.0763954	1.73929	1.54354	-0.0832087	-0.0738635
[truncated: 7,555 more rows]

## Sheet: Fig1D- TIRF microscopy p84
Figure 1D
	time [sec]	mean intensity Dy647-p84
	0	0
[truncated: 100 more rows]

## Sheet: Fig 1E- TIRF microscopy p84 NB
Figure 1E
[truncated: 43 more rows]

[truncated: 8 more sheets: Fig3_phosphorylation, Fig 4A-D raw HDX, Fig 4A-D analyzed HDX, Fig4E_assay, Fig5_A+B_Phosphorylation_MS, Fig5_D+E_Octet_Phos_Assay_NB7, Uncropped_Gels, Cropped_Gels_(purity)]
